# Supplementary material for: Heterogeneity of tumor immune microenvironment of EGFR/ALK-positive tumors versus EGFR/ALK-negative tumors in resected brain metastases from lung adenocarcinoma
Source: HighWire-hosted journal article supplement (doi:10.1136/jitc-2022-006243), 2023-03-01
Supplement: jitc-2022-006243supp013_data_supplement.xlsx [file jitc-2022-006243supp013_data_supplement.xlsx]

## Sheet: TableS1
Table S2. Demographics and pathological information of the Xiangya cohort.
Case	Sample ID of brain metastases	Sample ID of primary tumor	Smoking history	Molecular alterations	Group	Brain metastasis diagnosis to death or final follow-up (Months)	Status(0 = Alive; 1 = Dead)	Sampling method of brain metastases	Sampling method of primary tumor	The site of BM	Tumor size of brain metastases from surgical excision(cm*cm)	Tumor size of primary tumor from surgical excision(cm*cm)	EGFR/ALK-TKI	Immunotherapy	Radiotherapy	Chemotherapy	Immune phenotypes
P01	BM01		Smoker	Other	EGFR/ALK-negative	24	1	surgical excision		left frontoparietal lobe	4.5*4.5		non-treated	-	-	treated	Desert
P02	BM02		Smoker	Other	EGFR/ALK-negative	28	0	surgical excision		right occipital lobe	N/A		non-treated	treated	-	treated	Excluded
P03	BM03		Non-smoker	EGFR mutations	EGFR/ALK-positive	13	0	surgical excision		left frontal lobe	4.0*4.0		treated	-	-	-	Desert
P04	BM04		Non-smoker	Other	EGFR/ALK-negative	10	0	surgical excision		left cerebellum	5.0*6.0		-	-	-	treated	Excluded
P05	BM05		Smoker	EGFR mutations	EGFR/ALK-positive	16	0	surgical excision		left frontal lobe	N/A		treated	-	-	-	Desert
P06	BM06		Non-smoker	EGFR mutations	EGFR/ALK-positive	9	1	surgical excision		right temporal lobe	5.0*5.0		treated	-	-	-	Desert
P07	BM07		Non-smoker	ALK rearrangements	EGFR/ALK-positive	48	0	surgical excision		left occipital lobe, left cerebellum	3.0*3.5		treated	-	-	-	Desert
P08	BM08		Non-smoker	EGFR mutations	EGFR/ALK-positive	31	1	surgical excision		left frontal lobe	3.9*4.3		treated	-	SRS	-	Infiltrated
P09	BM09		Non-smoker	EGFR mutations	EGFR/ALK-positive	61	1	surgical excision		right temporal lobe	2.1*2.0		treated	-	SRS	treated	Desert
P10	BM10		Smoker	Other	EGFR/ALK-negative			surgical excision		bilateral occipital lobes, left parietal lobe	4.5*4.6						Excluded
P11	BM11		Non-smoker	EGFR mutations	EGFR/ALK-positive	34	0	surgical excision		right cerebellum	3.0*3.5		treated	-	-	-	Excluded
P12	BM12	PT01	Non-smoker	Other	EGFR/ALK-negative	20	0	surgical excision	surgical excision	left temporal lobe	3.0*3.0	2.8*2.2	non-treated	-	-	treated	Excluded
P13	BM13		Non-smoker	Other	EGFR/ALK-negative			surgical excision		right occipital lobe	4.5*6.8						Excluded
P14	BM14		Non-smoker	ALK rearrangements	EGFR/ALK-positive	34	0	surgical excision		right temporal lobe	2.0*2.0		treated	-	SRS	-	Desert
P15	BM15		Smoker	EGFR mutations	EGFR/ALK-positive	34	0	surgical excision		left occipital lobe	2.5*2.5		treated	-	-	-	Desert
P16	BM16		Smoker	EGFR mutations	EGFR/ALK-positive	15	0	surgical excision		right cerebellum	2.0*2.0		treated	-	SRS	-	Excluded
P17	BM17		Non-smoker	EGFR mutations	EGFR/ALK-positive	29	0	surgical excision		left parietal lobe	3.0*2.0		treated	-	-	treated	Desert
P18	BM18		Non-smoker	ALK rearrangements	EGFR/ALK-positive			surgical excision		right temporal lobe	5.0*4.5						Desert
P19	BM19		Non-smoker	EGFR mutations	EGFR/ALK-positive	12	0	surgical excision		left frontoparietal lobe	3.5*4.0		treated	-	-	-	Desert
P20	BM20		Non-smoker	EGFR mutations	EGFR/ALK-positive	16	0	surgical excision		right temporoparietal lobe	6.0*5.0		treated	-	-	-	Excluded
P21	BM21		Smoker	ALK rearrangements	EGFR/ALK-positive	25	0	surgical excision		left frontal lobe	3.0*2.5		treated	-	-	-	Excluded
P22	BM22		Non-smoker	EGFR mutations	EGFR/ALK-positive	12	1	surgical excision		right cerebellar hemisphere, left frontal lobe、occipital lobe	6.5*5.5		treated	-	-	-	Desert
P23	BM23		Non-smoker	EGFR mutations	EGFR/ALK-positive	4	1	surgical excision		right parietal occipital lobe	3.0*2.6		non-treated	-	-	-	Infiltrated
P24	BM24		Smoker	EGFR mutations	EGFR/ALK-positive	26	1	surgical excision		right frontal lobe	2.4*2.4		treated	-	-	-	Excluded
P25	BM25		Non-smoker	ALK rearrangements	EGFR/ALK-positive	8	1	surgical excision		right frontal lobe	4.0*4.0		-	-	-	-	Excluded
P26	BM26		Non-smoker	EGFR mutations	EGFR/ALK-positive			surgical excision		right frontal lobe	3.0*3.0						Excluded
P27	BM27		Smoker	KRAS mutations	EGFR/ALK-negative			surgical excision		right frontal lobe	3.0*2.0						Desert
P28	BM28		Non-smoker	EGFR mutations	EGFR/ALK-positive	12	0	surgical excision		left parietal occipital lobe	4.0*3.0		treated	-	-	-	Infiltrated
P29	BM29		Smoker	KRAS mutations	EGFR/ALK-negative	16	0	surgical excision		left cerebellum	4.2*3.6		non-treated	-	-	-	Desert
P30	BM30		Smoker	EGFR mutations	EGFR/ALK-positive	20	0	surgical excision		right occipital lobe, right frontoparietal lobe	4.0*3.0		treated	-	-	-	Excluded
P31	BM31		Smoker	KRAS mutations	EGFR/ALK-negative	35	0	surgical excision		left parietal occipital lobe	2.6*2.2		non-treated	treated	-	-	Excluded
P32	BM32		Smoker	ALK rearrangements	EGFR/ALK-positive			surgical excision		left parietal occipital lobe, right temporal occipital lobe	3.0*4.0						Excluded
P33	BM33		Non-smoker	EGFR mutations	EGFR/ALK-positive	12	0	surgical excision		left parietal lobe	7.8*5.7		treated	-	WBRT	-	Excluded
P34	BM34		Smoker	Other	EGFR/ALK-negative	20	0	surgical excision		left parietal occipital lobe, right parietal occipital lobe	4.0*3.0		non-treated	treated	WBRT	treated	Excluded
P35	BM35	PT02	Non-smoker	EGFR mutations	EGFR/ALK-positive	8	0	surgical excision	surgical excision	left parietal occipital lobe	N/A	1.5*1.5	non-treated	treated	WBRT	treated	N/A
P36	BM36		Non-smoker	ALK rearrangements	EGFR/ALK-positive	10	0	surgical excision		right cerebellum	N/A		treated	-	-	-	Desert
P37	BM37		Non-smoker	Other	EGFR/ALK-negative	10	0	surgical excision		cerebellar vermis	4.0*4.0		non-treated	treated	-	treated	Excluded
P38	BM38		Non-smoker	KRAS mutations	EGFR/ALK-negative	16	0	surgical excision		cerebellar vermis、dorsal brainstem	3.0*3.5		-	-	-	-	Infiltrated
P39	BM39		Non-smoker	ALK rearrangements	EGFR/ALK-positive	14	0	surgical excision		left temporal occipital lobe	5.0*4.5		treated	-	-	-	Desert
P40	BM40		Smoker	EGFR mutations	EGFR/ALK-positive	11	0	surgical excision		right frontal lobe, right pontine cerebellar angle	7.0*6.0		treated	-	SRS	-	Desert
P41	BM41		Smoker	Other	EGFR/ALK-negative			surgical excision		left temporal lobe	N/A						Desert
P42	BM42		Non-smoker	Other	EGFR/ALK-negative	42	0	surgical excision		left cerebellum	2.5*3.0		non-treated	-	SRS	treated	Infiltrated
P43	BM43	PT03	Smoker	KRAS mutations	EGFR/ALK-negative	19	1	surgical excision	surgical excision	left frontal lobe	2.8*2.6	6.5*6.0	non-treated	treated	-	-	Infiltrated
P44	BM44		Non-smoker	Other	EGFR/ALK-negative			surgical excision		right frontal lobe	3.0*2.5						Excluded
P45	BM45		Smoker	EGFR mutations	EGFR/ALK-positive			surgical excision		left thalamus	2.7*2.5						Excluded
P46	BM46		Non-smoker	EGFR mutations	EGFR/ALK-positive			surgical excision		left frontal lobe	N/A						Desert
P47	BM47		Non-smoker	Other	EGFR/ALK-negative	23	0	surgical excision		left frontal lobe	3.0*3.0		non-treated	-	-	-	N/A
P48	BM48	PT04	Non-smoker	EGFR mutations	EGFR/ALK-positive	12	0	surgical excision	surgical excision	left cerebellum	2.0*2.0	2.5*2.5	non-treated	-	-	-	Desert
P49	BM49		Smoker	KRAS mutations	EGFR/ALK-negative			surgical excision		right frontal lobe	5.0*5.0						Infiltrated
P50	BM50		Non-smoker	Co-occuring	Co-occuring	14	0	surgical excision		left cerebellum	N/A		treated	-	-	-	N/A
P51	BM51		Non-smoker	Co-occuring	Co-occuring	23	1	surgical excision		right frontal lobe	N/A		-	-	-	-	N/A
P52	BM52		Non-smoker	EGFR mutations	EGFR/ALK-positive	33	1	surgical excision		left cerebellum	3.0*3.0		treated	-	-	-	Desert
P53	BM53		Smoker	ALK rearrangements	EGFR/ALK-positive	2	1	surgical excision		left cerebellum	2.0*3.0		non-treated	-	-	-	Desert
P54	BM54		Non-smoker	EGFR mutations	EGFR/ALK-positive	26	0	surgical excision		right frontal lobe, cerebellar vermis	3.4*3.2		treated	-	-	-	Excluded
P55	BM55		Non-smoker	EGFR mutations	EGFR/ALK-positive	2	1	surgical excision		left parietal lobe	2.5*2.5		non-treated	-	-	-	Infiltrated
P56	BM56		Non-smoker	EGFR mutations	EGFR/ALK-positive			surgical excision		left frontal lobe, cerebellum	5.0*4.0						Excluded
P57	BM57		Non-smoker	Other	EGFR/ALK-negative	1	1	surgical excision		right parietal lobe	4.0*5.0		non-treated	-	-	-	Excluded
P58	BM58		Smoker	Other	EGFR/ALK-negative	18	0	surgical excision		left frontal lobe	2.7*2.5		-	-	-	-	Excluded
P59	BM59		Non-smoker	KRAS mutations	EGFR/ALK-negative	3	1	surgical excision		right frontal lobe	3.3*3.1		non-treated	-	SRS	-	Excluded
P60	BM60		Smoker	Other	EGFR/ALK-negative	25	1	surgical excision		left parietal occipital lobe	N/A		-	-	-	-	Excluded
P61	BM61		Non-smoker	KRAS mutations	EGFR/ALK-negative	4	1	surgical excision		left temporal lobe, left cerebellar hemisphere	2.5*3.0		non-treated	-	-	-	Infiltrated
P62	BM62		Smoker	Other	EGFR/ALK-negative			surgical excision		left parietal lobe	3.0*3.0						Excluded
P63	BM63		Non-smoker	EGFR mutations	EGFR/ALK-positive	11	0	surgical excision		left frontal lobe	5.0*4.0		treated	-	-	-	Excluded
P64	BM64		Non-smoker	EGFR mutations	EGFR/ALK-positive			surgical excision		right frontotemporal lobe	N/A						Desert
P65	BM65		Non-smoker	EGFR mutations	EGFR/ALK-positive	13	0	surgical excision		cerebellar vermis	4.8*4.0		treated	-	-	-	Excluded
P66	BM66		Smoker	KRAS mutations	EGFR/ALK-negative	8	1	surgical excision		left occipital lobe	3.5*3.2		non-treated	-	SRS	-	Desert
P67	BM67		Non-smoker	EGFR mutations	EGFR/ALK-positive			surgical excision		left frontal lobe	5.0*5.0						Excluded
P68	BM68		Smoker	Co-occuring	Co-occuring	10	1	surgical excision		right frontal lobe	2.0*3.0		treated	-	-	-	N/A
P69	BM69	PT05	Non-smoker	EGFR mutations	EGFR/ALK-positive	39	0	surgical excision	surgical excision	left orbital apex sphenoid crest	N/A	2.0*1.0	treated	-	WBRT	-	Desert
P70	BM70	PT06	Smoker	KRAS mutations	EGFR/ALK-negative	39	0	surgical excision	surgical excision	left temporal lobe	5.0*4.0	5.5*4.0	-	-	-	-	Excluded
