# Supplementary material for: Heterogeneity of tumor immune microenvironment of EGFR/ALK-positive tumors versus EGFR/ALK-negative tumors in resected brain metastases from lung adenocarcinoma
Source: HighWire-hosted journal article supplement (doi:10.1136/jitc-2022-006243), 2023-03-01
Supplement: jitc-2022-006243supp014_data_supplement.xlsx [file jitc-2022-006243supp014_data_supplement.xlsx]

## Sheet: Sheet1
Table S3. Sample information of paired samples in the Xiangya cohort.
Sample ID	Paired	Sampling method	Tumor size from surgical excision(cm*cm)	Tissue type
PT01	NO.001	surgical excision	2.8*2.2	primary lung cancer
PT02	NO.002	surgical excision	1.5*1.5	primary lung cancer
PT03	NO.003	surgical excision	6.5*6.0	primary lung cancer
PT04	NO.004	surgical excision	2.5*2.5	primary lung cancer
PT05	NO.005	surgical excision	2.0*1.0	primary lung cancer
PT06	NO.006	surgical excision	5.5*4.0	primary lung cancer
BM12	NO.001	surgical excision	3.0*3.0	brain metastases
BM35	NO.002	surgical excision	N/A	brain metastases
BM43	NO.003	surgical excision	2.8*2.6	brain metastases
BM48	NO.004	surgical excision	2.0*2.0	brain metastases
BM69	NO.005	surgical excision	N/A	brain metastases
BM70	NO.006	surgical excision	5.0*4.0	brain metastases
