# Supplementary material for: Heterogeneity of tumor immune microenvironment of EGFR/ALK-positive tumors versus EGFR/ALK-negative tumors in resected brain metastases from lung adenocarcinoma
Source: HighWire-hosted journal article supplement (doi:10.1136/jitc-2022-006243), 2023-03-01
Supplement: jitc-2022-006243supp015_data_supplement.xlsx [file jitc-2022-006243supp015_data_supplement.xlsx]

## Sheet: CD3R_3
Table S4. the CDR3 of the TCR β chain (TRB) was recovery from the bulk RNA-seq.
id	cloneId	cloneCount	cloneFraction	targetSequences	targetQualities	allVHitsWithScore	allDHitsWithScore	allJHitsWithScore	allCHitsWithScore	allVAlignments	allDAlignments	allJAlignments	allCAlignments	nSeqFR1	minQualFR1	nSeqCDR1	minQualCDR1	nSeqFR2	minQualFR2	nSeqCDR2	minQualCDR2	nSeqFR3	minQualFR3	nSeqCDR3	minQualCDR3	nSeqFR4	minQualFR4	aaSeqFR1	aaSeqCDR1	aaSeqFR2	aaSeqCDR2	aaSeqFR3	aaSeqCDR3	aaSeqFR4	refPoints
BM01	23	29	0.271028	TGTGCCAGCAGTTTAATGAGTGAGGCGGACACTGAAGCTTTCTTT	EEEEDEEEEEEEEEEDEEEEEEEEDEEEDEEEEEEDEEEEEEEEE	TRBV28*00(174.4)		TRBJ1-1*00(222.6)		427|442|464|0|15||75.0		23|40|68|28|45||85.0		NA	NA	NA	NA	NA	NA	NA	NA	NA	NA	TGTGCCAGCAGTTTAATGAGTGAGGCGGACACTGAAGCTTTCTTT	35	NA	NA	NA	NA	NA	NA	NA	CASSLMSEADTEAFF	NA	:::::::::0:-2:15:::::28:-3:45:::
BM01	82	10	0.0934579	TGTGCCAGCAGAACACAGGGAAGGGGGACTGAAGCTTTCTTT	EEDDCDEEDDEDEEEEEEEEECEEEEECEEEECECEEEEEED	TRBV6-1*00(141.7),TRBV6-5*00(141.7),TRBV6-6*00(141.7)	TRBD1*00(30)	TRBJ1-1*00(203.6)		427|438|464|0|11||55.0;427|438|464|0|11||55.0;427|438|464|0|11||55.0	15|21|36|14|20||30.0	25|40|68|27|42||75.0		NA	NA	NA	NA	NA	NA	NA	NA	NA	NA	TGTGCCAGCAGAACACAGGGAAGGGGGACTGAAGCTTTCTTT	34	NA	NA	NA	NA	NA	NA	NA	CASRTQGRGTEAFF	NA	:::::::::0:-6:11:14:-3:-3:20:27:-5:42:::
BM01	100	9	0.0841121	TGTGCCAGCAGTGCAGATTTCCCAGGGATCTATAATTCACCCCTCCACTTT	EEEEDEEEEEEEEEEDDDEEEEEEEEEEECEEEDEEDDDEECEDDEEEEEE	TRBV6-1*00(144.9),TRBV6-5*00(139.9)	TRBD1*00(25)	TRBJ1-6*00(213)		427|440|464|0|13||65.0;427|439|464|0|12||60.0	16|21|36|22|27||25.0	23|45|73|29|51||110.0		NA	NA	NA	NA	NA	NA	NA	NA	NA	NA	TGTGCCAGCAGTGCAGATTTCCCAGGGATCTATAATTCACCCCTCCACTTT	34	NA	NA	NA	NA	NA	NA	NA	CASSADFPGIYNSPLHF	NA	:::::::::0:-4:13:22:-4:-3:27:29:-3:51:::
BM01	197	6	0.0560748	TGTGCCAGCCTAACAGGGTTCACTGAAGCTTTCTTT	EEDDEBCE@EEDDEDDEDDDEBEEDDDCDEDEDEEC	TRBV12-3*00(190),TRBV12-4*00(190)	TRBD1*00(30)	TRBJ1-1*00(204.8)		430|439|467|0|9||45.0;430|439|467|0|9||45.0	15|21|36|12|18||30.0	24|40|68|20|36||80.0		NA	NA	NA	NA	NA	NA	NA	NA	NA	NA	TGTGCCAGCCTAACAGGGTTCACTGAAGCTTTCTTT	31	NA	NA	NA	NA	NA	NA	NA	CASLTGFTEAFF	NA	:::::::::0:-8:9:12:-3:-3:18:20:-4:36:::
BM01	439	3	0.0280374	TGTGCCAGCAGTTTGGCCTACGAGCAGTACTTC	DEDECE@DECE@CDEDDBD?BDCEDBEEACEDC	TRBV12-3*00(202.5),TRBV12-4*00(202.5)		TRBJ2-7*00(212)		430|444|467|0|14||70.0;430|444|467|0|14||70.0		22|39|67|16|33||85.0		NA	NA	NA	NA	NA	NA	NA	NA	NA	NA	TGTGCCAGCAGTTTGGCCTACGAGCAGTACTTC	30	NA	NA	NA	NA	NA	NA	NA	CASSLAYEQYF	NA	:::::::::0:-3:14:::::16:-2:33:::
BM01	440	3	0.0280374	TGTGCCAGCAGTTTTCAGGGGTGGGTGCAGTACTTC	EDEDBCECDDBDBDABCDEDECEEEEEEEEDDD@DC	TRBV28*00(225)	TRBD1*00(30)	TRBJ2-7*00(190)		427|441|464|0|14||70.0	16|22|36|15|21||30.0	29|39|67|26|36||50.0		NA	NA	NA	NA	NA	NA	NA	NA	NA	NA	TGTGCCAGCAGTTTTCAGGGGTGGGTGCAGTACTTC	31	NA	NA	NA	NA	NA	NA	NA	CASSFQGWVQYF	NA	:::::::::0:-3:14:15:-4:-2:21:26:-9:36:::
BM01	441	3	0.0280374	TGTGCCAGCAGCTTAGGGACCAACCTGGGAGGTGAGCAGTTCTTC	FEEEFEFEEFFEEEFFFFEFFFEFEFFEFFFFFEFFFFFFEEFFF	TRBV7-2*00(125),TRBV11-2*00(120),TRBV11-3*00(109),TRBV7-9*00(109)	TRBD2*00(30)	TRBJ2-1*00(173)		430|446|467|0|16||80.0;430|446|467|0|16||80.0;430|446|467|0|16||80.0;430|446|467|0|16||80.0	25|31|48|26|32||30.0	29|42|70|32|45||65.0		NA	NA	NA	NA	NA	NA	NA	NA	NA	NA	TGTGCCAGCAGCTTAGGGACCAACCTGGGAGGTGAGCAGTTCTTC	36	NA	NA	NA	NA	NA	NA	NA	CASSLGTNLGGEQFF	NA	:::::::::0:-1:16:26:-9:-1:32:32:-9:45:::
BM01	503	2	0.0186916	TGTGCCAGTAGTATAGACGGAGATTCACCCCTCCACTTT	DEEE>DBEDDCEBEEEACCEDEDCCE@DECED?DADDEE	TRBV19*00(287)		TRBJ1-6*00(159.5)		427|444|464|0|17||85.0		28|45|73|22|39||85.0		NA	NA	NA	NA	NA	NA	NA	NA	NA	NA	TGTGCCAGTAGTATAGACGGAGATTCACCCCTCCACTTT	29	NA	NA	NA	NA	NA	NA	NA	CASSIDGDSPLHF	NA	:::::::::0:0:17:::::22:-8:39:::
BM01	504	2	0.0186916	TGTGCCAGTAGTATTTTCGGCGAGCAGTACTTC	EEEEDEEEAEEEECEEDEEEEEEEEEECBEDBD	TRBV19*00(240)		TRBJ2-7*00(165)		427|441|464|0|14||70.0		26|39|67|20|33||65.0		NA	NA	NA	NA	NA	NA	NA	NA	NA	NA	TGTGCCAGTAGTATTTTCGGCGAGCAGTACTTC	32	NA	NA	NA	NA	NA	NA	NA	CASSIFGEQYF	NA	:::::::::0:-3:14:::::20:-6:33:::
BM01	505	2	0.0186916	TGTGCCAGCTGGACAGGGGCCCTGAACACTGAAGCTTTCTTT	EFEDEFEFFFEEEFEEFFEFFFFEEFEFEEFEEFEFFFEFFF	TRBV25-1*00(175)	TRBD1*00(45)	TRBJ1-1*00(240)		427|436|464|0|9||45.0	13|22|36|10|19||45.0	20|40|68|22|42||100.0		NA	NA	NA	NA	NA	NA	NA	NA	NA	NA	TGTGCCAGCTGGACAGGGGCCCTGAACACTGAAGCTTTCTTT	35	NA	NA	NA	NA	NA	NA	NA	CASWTGALNTEAFF	NA	:::::::::0:-8:9:10:-1:-2:19:22:0:42:::
BM01	506	2	0.0186916	TGTGCCTGGAGCCTATTCTCTAGCGGGAGCAATGAGCAGTTCTTC	EEFEEEEEFEEEEEEEEEEEEFFEEEEFEFEEEEEEEEEEEEEEE	TRBV30*00(592)	TRBD2*00(50)	TRBJ2-1*00(98)		421|432|455|0|11||55.0	20|30|48|19|29||50.0	26|42|70|29|45||80.0		NA	NA	NA	NA	NA	NA	NA	NA	NA	NA	TGTGCCTGGAGCCTATTCTCTAGCGGGAGCAATGAGCAGTTCTTC	36	NA	NA	NA	NA	NA	NA	NA	CAWSLFSSGSNEQFF	NA	:::::::::0:-3:11:19:-4:-2:29:29:-6:45:::
BM01	507	2	0.0186916	TGTGCCAGCAGTCCCGGACAGAACACTGAAGCTTTCTTT	EEEEEEECEDEBEEDEEDBEDDCEEDEDDEDEEEEEEEE	TRBV6-1*00(200),TRBV6-5*00(200),TRBV6-6*00(200),TRBV6-2*00(184),TRBV6-3*00(184)	TRBD1*00(25),TRBD2*00(25)	TRBJ1-1*00(235)		427|439|464|0|12||60.0;427|439|464|0|12||60.0;427|439|464|0|12||60.0;427|439|464|0|12||60.0;427|439|464|0|12||60.0	9|14|36|12|17||25.0;13|18|48|12|17||25.0	21|40|68|20|39||95.0		NA	NA	NA	NA	NA	NA	NA	NA	NA	NA	TGTGCCAGCAGTCCCGGACAGAACACTGAAGCTTTCTTT	33	NA	NA	NA	NA	NA	NA	NA	CASSPGQNTEAFF	NA	:::::::::0:-5:12:12:3:-10:17:20:-1:39:::
BM01	508	2	0.0186916	TGTGCCAGCAGTTACTCGATCGAGACTGAAGCTTTCTTT	CEEEEE?EE>EEEBDEDE=E@EEECEEEDEEEEEB:DCE	TRBV6-5*00(235),TRBV6-6*00(235),TRBV6-2*00(219),TRBV6-3*00(219),TRBV6-8*00(219)		TRBJ1-1*00(215)		427|446|464|0|19||95.0;427|446|464|0|19||95.0;427|446|464|0|19||95.0;427|446|464|0|19||95.0;424|443|461|0|19||95.0		25|40|68|24|39||75.0		NA	NA	NA	NA	NA	NA	NA	NA	NA	NA	TGTGCCAGCAGTTACTCGATCGAGACTGAAGCTTTCTTT	25	NA	NA	NA	NA	NA	NA	NA	CASSYSIETEAFF	NA	:::::::::0:2:19:::::24:-5:39:::
BM01	557	1	0.00934579	TGTGCCACCTCCGGGACTAGAACCTACGAGCAGTACTTC	EDEDEEEDEEDDEEE>EC6EBDEDD=EE>EE?E7CEEED	TRBV10-3*00(195)	TRBD2*00(50)	TRBJ2-7*00(150)		427|434|464|0|7||35.0	14|24|48|10|20||50.0	22|39|67|22|39||85.0		NA	NA	NA	NA	NA	NA	NA	NA	NA	NA	TGTGCCACCTCCGGGACTAGAACCTACGAGCAGTACTTC	21	NA	NA	NA	NA	NA	NA	NA	CATSGTRTYEQYF	NA	:::::::::0:-10:7:10:2:-8:20:22:-2:39:::
BM01	558	1	0.00934579	TGTGCCAGCAGTATCGGGACTCGTAATGAGCAGTTCTTC	DEDCD@EEDEEDEEDEDE?E@EE=E@DEEEEDEEDDED?	TRBV12-3*00(180),TRBV12-4*00(180)	TRBD2*00(35),TRBD1*00(30)	TRBJ2-1*00(215)		430|442|467|0|12||60.0;430|442|467|0|12||60.0	15|22|48|14|21||35.0;11|17|36|14|20||30.0	27|42|70|24|39||75.0		NA	NA	NA	NA	NA	NA	NA	NA	NA	NA	TGTGCCAGCAGTATCGGGACTCGTAATGAGCAGTTCTTC	28	NA	NA	NA	NA	NA	NA	NA	CASSIGTRNEQFF	NA	:::::::::0:-5:12:14:1:-10:21:24:-7:39:::
BM01	559	1	0.00934579	TGTGCCAGCAGCCTGGGACTAGTGTTTGGCGGGGAGCTGTTTTTT	EEEECEDDEEEDDEEEDDCEEEEEEEEEBBEEEEEEEEEEEEEEE	TRBV12-3*00(165),TRBV12-4*00(165)	TRBD2*00(40)	TRBJ2-2*00(220)		430|441|467|0|11||55.0;430|441|467|0|11||55.0	16|24|48|14|22||40.0	27|43|71|29|45||80.0		NA	NA	NA	NA	NA	NA	NA	NA	NA	NA	TGTGCCAGCAGCCTGGGACTAGTGTTTGGCGGGGAGCTGTTTTTT	33	NA	NA	NA	NA	NA	NA	NA	CASSLGLVFGGELFF	NA	:::::::::0:-6:11:14:0:-8:22:29:-7:45:::
BM01	560	1	0.00934579	TGTGCCACTAAAGGGGCGGGCTACACCTTC	EE?EECDEEEEECEEECDEDDADECEEEEE	TRBV19*00(299)	TRBD1*00(30)	TRBJ1-2*00(130)		427|434|464|0|7||35.0	19|25|36|12|18||30.0	28|40|68|18|30||60.0		NA	NA	NA	NA	NA	NA	NA	NA	NA	NA	TGTGCCACTAAAGGGGCGGGCTACACCTTC	30	NA	NA	NA	NA	NA	NA	NA	CATKGAGYTF	NA	:::::::::0:-10:7:12:-7:1:18:18:-8:30:::
BM01	561	1	0.00934579	TGTGCCAGTAGTACTGGTAGCTCCTACGAGCAGTACTTC	?CEE=BE=EDCECEEEAECBD<EEC?EA7=AE6?E?EDD	TRBV19*00(329)		TRBJ2-7*00(213)		427|440|464|0|13||65.0		18|39|67|18|39||105.0		NA	NA	NA	NA	NA	NA	NA	NA	NA	NA	TGTGCCAGTAGTACTGGTAGCTCCTACGAGCAGTACTTC	21	NA	NA	NA	NA	NA	NA	NA	CASSTGSSYEQYF	NA	:::::::::0:-4:13:::::18:2:39:::
BM01	562	1	0.00934579	TGTGCCAGCAGTGAAGTCCACACTGAAGCTTTCTTT	CEEEEDE@EEDEEEEEDEEEEEEEEEEEEEEEEEED	TRBV2*00(235)		TRBJ1-1*00(225)		430|446|467|0|16||80.0		23|40|68|19|36||85.0		NA	NA	NA	NA	NA	NA	NA	NA	NA	NA	TGTGCCAGCAGTGAAGTCCACACTGAAGCTTTCTTT	31	NA	NA	NA	NA	NA	NA	NA	CASSEVHTEAFF	NA	:::::::::0:-1:16:::::19:-3:36:::
BM01	563	1	0.00934579	TGTGCCAGCAGTACCCGACAGGGGGTTCAGCCCCAGCATTTT	EEEEEDEEEEE@DEEDE@EDEECEEEDDEEEE?EDEE?EEEE	TRBV2*00(319)	TRBD1*00(45)	TRBJ1-5*00(220)		430|442|467|0|12||60.0	14|23|36|16|25||45.0	26|42|70|26|42||80.0		NA	NA	NA	NA	NA	NA	NA	NA	NA	NA	TGTGCCAGCAGTACCCGACAGGGGGTTCAGCCCCAGCATTTT	30	NA	NA	NA	NA	NA	NA	NA	CASSTRQGVQPQHF	NA	:::::::::0:-5:12:16:-2:-1:25:26:-6:42:::
BM01	564	1	0.00934579	TGTGCCAGCAGCGAAGGACTTGTTGAGACCCAGTACTTC	BDCD<DDADDDCECDCB?EEDEEEEEECDCDE?ED;DBD	TRBV2*00(229)		TRBJ2-5*00(215)		430|446|467|0|16|ST441C|64.0		25|40|68|24|39||75.0		NA	NA	NA	NA	NA	NA	NA	NA	NA	NA	TGTGCCAGCAGCGAAGGACTTGTTGAGACCCAGTACTTC	26	NA	NA	NA	NA	NA	NA	NA	CASSEGLVETQYF	NA	:::::::::0:-1:16:::::24:-5:39:::
BM01	566	1	0.00934579	TGTGCCAGCAGTGAAGAGGGATCCCCTCCCCGCCACGAGCAGTACTTC	EEEEEEEDEEEEEEEEDDDEA;EEDECEDEDEDEBDEDEDEEE?DDDE	TRBV2*00(175)	TRBD2*00(35)	TRBJ2-7*00(210)		430|446|467|0|16||80.0	0|7|48|23|30||35.0	25|39|67|34|48||70.0		NA	NA	NA	NA	NA	NA	NA	NA	NA	NA	TGTGCCAGCAGTGAAGAGGGATCCCCTCCCCGCCACGAGCAGTACTTC	26	NA	NA	NA	NA	NA	NA	NA	CASSEEGSPPRHEQYF	NA	:::::::::0:-1:16:23:16:-25:30:34:-5:48:::
BM01	567	1	0.00934579	TGTGCCAGCACCGAAAGGGGGAAAGAGACCCAGTACTTC	EEEEDEDEEEEEEEEEEFEEEBEEEEE9EEEEDCECEAE	TRBV25-1*00(185)	TRBD1*00(30)	TRBJ2-5*00(124)		427|437|464|0|10||50.0	17|23|36|15|21||30.0	23|40|68|22|39||85.0		NA	NA	NA	NA	NA	NA	NA	NA	NA	NA	TGTGCCAGCACCGAAAGGGGGAAAGAGACCCAGTACTTC	24	NA	NA	NA	NA	NA	NA	NA	CASTERGKETQYF	NA	:::::::::0:-7:10:15:-5:-1:21:22:-3:39:::
BM01	568	1	0.00934579	TGTGCCAGCAGTTTTAACACCGGGGAGCTGTTTTTT	EEEDEEEEEDEDEEEECEDEDEEEEEECEEEEEEEE	TRBV27*00(225)		TRBJ2-2*00(245)		427|441|464|0|14||70.0		22|43|71|15|36||105.0		NA	NA	NA	NA	NA	NA	NA	NA	NA	NA	TGTGCCAGCAGTTTTAACACCGGGGAGCTGTTTTTT	34	NA	NA	NA	NA	NA	NA	NA	CASSFNTGELFF	NA	:::::::::0:-3:14:::::15:-2:36:::
BM01	569	1	0.00934579	TGTGCCATCGCGGATGCAGGGGCTTATGGCTACACCTTC	FEEEEEEEEEEEEEEFEEEEEFEFEEEEEFEEEEFEEEE	TRBV28*00(239)	TRBD1*00(30)	TRBJ1-2*00(215)		427|434|464|0|7||35.0	16|22|36|16|22||30.0	25|40|68|24|39||75.0		NA	NA	NA	NA	NA	NA	NA	NA	NA	NA	TGTGCCATCGCGGATGCAGGGGCTTATGGCTACACCTTC	36	NA	NA	NA	NA	NA	NA	NA	CAIADAGAYGYTF	NA	:::::::::0:-10:7:16:-4:-2:22:24:-5:39:::
BM01	570	1	0.00934579	TGTGCCAGCAGTTTACACTCTGGAAACACCATATATTTT	EEFEEEEECEEDEE9EEDDEEEEEDEDEEEEEEEEEEBE	TRBV28*00(215)		TRBJ1-3*00(250)		427|442|464|0|15||75.0		20|42|70|17|39||110.0		NA	NA	NA	NA	NA	NA	NA	NA	NA	NA	TGTGCCAGCAGTTTACACTCTGGAAACACCATATATTTT	24	NA	NA	NA	NA	NA	NA	NA	CASSLHSGNTIYF	NA	:::::::::0:-2:15:::::17:0:39:::
BM01	571	1	0.00934579	TGTGCCAGCAGTCCCTGGAGCAGGAGCAATGAAAAACTGTTTTTT	E>CA7?;9=A7B@;=AD8DDCDED=DEE;ED8:C;ACDD?DBDCC	TRBV28*00(189)	TRBD1*00(25)	TRBJ1-4*00(220)		427|439|464|0|12||60.0	3|8|36|12|17||25.0	25|43|71|27|45||90.0		NA	NA	NA	NA	NA	NA	NA	NA	NA	NA	TGTGCCAGCAGTCCCTGGAGCAGGAGCAATGAAAAACTGTTTTTT	22	NA	NA	NA	NA	NA	NA	NA	CASSPWSRSNEKLFF	NA	:::::::::0:-5:12:12:9:-16:17:27:-5:45:::
BM01	572	1	0.00934579	TGTGCCAGCAGTTTACTAGCGGAGACCGGGGAGCTGTTTTTT	EEEEEEDBCEEEDE?DBDEDEEEEDE6EEDEDEEEEEEEEDE	TRBV28*00(200)	TRBD2*00(35)	TRBJ2-2*00(230)		427|442|464|0|15||75.0	20|27|48|15|22||35.0	25|43|71|24|42||90.0		NA	NA	NA	NA	NA	NA	NA	NA	NA	NA	TGTGCCAGCAGTTTACTAGCGGAGACCGGGGAGCTGTTTTTT	21	NA	NA	NA	NA	NA	NA	NA	CASSLLAETGELFF	NA	:::::::::0:-2:15:15:-4:-5:22:24:-5:42:::
BM01	573	1	0.00934579	TGTGCCAGCTACTCCAGGGACCCACGTTTGGGCGGGGAGCTGTTTTTT	FEEEEEEEFEEEEEFEEEEEEEEEEE<EEEEEEEEEEEEEEEFEEFEE	TRBV28*00(249)	TRBD1*00(29),TRBD2*00(29)	TRBJ2-2*00(220)		427|436|464|0|9||45.0	8|17|36|12|21|SC11A|29.0;12|21|48|12|21|SC15A|29.0	27|43|71|32|48||80.0		NA	NA	NA	NA	NA	NA	NA	NA	NA	NA	TGTGCCAGCTACTCCAGGGACCCACGTTTGGGCGGGGAGCTGTTTTTT	27	NA	NA	NA	NA	NA	NA	NA	CASYSRDPRLGGELFF	NA	:::::::::0:-8:9:12:4:-7:21:32:-7:48:::
BM01	574	1	0.00934579	TGTGCCAGCAGGATCAGAGACCAAGAGACCCAGTACTTC	EEEEEEFEEEEEEEEEEEEEEEEEEEEEEEEEFECEEED	TRBV28*00(259)		TRBJ2-5*00(240)		427|438|464|0|11||55.0		20|40|68|19|39||100.0		NA	NA	NA	NA	NA	NA	NA	NA	NA	NA	TGTGCCAGCAGGATCAGAGACCAAGAGACCCAGTACTTC	34	NA	NA	NA	NA	NA	NA	NA	CASRIRDQETQYF	NA	:::::::::0:-6:11:::::19:0:39:::
BM01	575	1	0.00934579	TGTGCCAGCGGGACTAGCGTTCGGTACGAGCAGTACTTC	EEED7BEEDEDE>7E9DBEDD@EEEEDE@CDEEE7ADED	TRBV28*00(185)	TRBD2*00(50)	TRBJ2-7*00(215)		427|436|464|0|9||45.0	16|26|48|9|19||50.0	24|39|67|24|39||75.0		NA	NA	NA	NA	NA	NA	NA	NA	NA	NA	TGTGCCAGCGGGACTAGCGTTCGGTACGAGCAGTACTTC	22	NA	NA	NA	NA	NA	NA	NA	CASGTSVRYEQYF	NA	:::::::::0:-8:9:9:0:-6:19:24:-4:39:::
BM01	576	1	0.00934579	TGTGCCAGCAGTTTTGGTCCGGGCGACAACTCCGGCTACGAGCAGTACTTC	EE<EDEEEEEE9EEEEECDEEE@BEE9CBEEEEDEE<DEEDCD>EA9DEA>	TRBV28*00(274)	TRBD1*00(25),TRBD2*00(25)	TRBJ2-7*00(105)		427|441|464|0|14||70.0	10|15|36|18|23||25.0;14|19|48|18|23||25.0	23|39|67|35|51||80.0		NA	NA	NA	NA	NA	NA	NA	NA	NA	NA	TGTGCCAGCAGTTTTGGTCCGGGCGACAACTCCGGCTACGAGCAGTACTTC	24	NA	NA	NA	NA	NA	NA	NA	CASSFGPGDNSGYEQYF	NA	:::::::::0:-3:14:18:2:-9:23:35:-3:51:::
BM01	577	1	0.00934579	TGCAGCGTTGAAGATAGGACTTGGGTAGATACGCAGTATTTT	EEDEEEEEEE@EEEAEEEEDEEEE:EEECDEDEEEEECEEED	TRBV29-1*00(298)	TRBD2*00(25)	TRBJ2-3*00(115)		421|436|455|0|15||75.0	17|22|48|16|21||25.0	25|41|69|26|42||80.0		NA	NA	NA	NA	NA	NA	NA	NA	NA	NA	TGCAGCGTTGAAGATAGGACTTGGGTAGATACGCAGTATTTT	25	NA	NA	NA	NA	NA	NA	NA	CSVEDRTWVDTQYF	NA	:::::::::0:1:15:16:-1:-10:21:26:-5:42:::
BM01	578	1	0.00934579	TGCAGCGTTGAAGGGGGCCCGGGACCACCCTACGAGCAGTACTTC	FD:<=BE?EE=EEDEEABEECEE=CE9EEEE>E<C9E?EECEEED	TRBV29-1*00(288)	TRBD1*00(40),TRBD2*00(40)	TRBJ2-7*00(105)		421|434|455|0|13||65.0	9|17|36|17|25||40.0;13|21|48|17|25||40.0	22|39|67|28|45||85.0		NA	NA	NA	NA	NA	NA	NA	NA	NA	NA	TGCAGCGTTGAAGGGGGCCCGGGACCACCCTACGAGCAGTACTTC	24	NA	NA	NA	NA	NA	NA	NA	CSVEGGPGPPYEQYF	NA	:::::::::0:-1:13:17:3:-7:25:28:-2:45:::
BM01	579	1	0.00934579	TGTGCCTGGAGCCTATTCTCTAGTGGGAGCAATGAGCAGTTCTTC	EEEED?CEEEDD?EDECDEC<EEECEEDEEEDEEEEEEE?EEDEE	TRBV30*00(592)	TRBD2*00(34)	TRBJ2-1*00(98)		421|432|455|0|11||55.0	20|30|48|19|29|SC24T|34.0	26|42|70|29|45||80.0		NA	NA	NA	NA	NA	NA	NA	NA	NA	NA	TGTGCCTGGAGCCTATTCTCTAGTGGGAGCAATGAGCAGTTCTTC	27	NA	NA	NA	NA	NA	NA	NA	CAWSLFSSGSNEQFF	NA	:::::::::0:-3:11:19:-4:-2:29:29:-6:45:::
BM01	580	1	0.00934579	TGCGCCAGCAGCTCGGGGACGGCGAACACTGAAGCTTTCTTT	EEEDEEEEEEEEEDEEEEEDEEEEE:EDEEEEEEEEEEEEEE	TRBV5-1*00(190)	TRBD1*00(25),TRBD2*00(25)	TRBJ1-1*00(235)		427|440|463|0|13||65.0	12|17|36|15|20||25.0;16|21|48|15|20||25.0	21|40|68|23|42||95.0		NA	NA	NA	NA	NA	NA	NA	NA	NA	NA	TGCGCCAGCAGCTCGGGGACGGCGAACACTGAAGCTTTCTTT	25	NA	NA	NA	NA	NA	NA	NA	CASSSGTANTEAFF	NA	:::::::::0:-3:13:15:0:-7:20:23:-1:42:::
BM01	581	1	0.00934579	TGCGCCAGCAGCTTGCTGGGTACGAACACTGAAGCTTTCTTT	:DA6:EB@CBBEEED?AEECC;EBBBED>E@BECDBBEDDEE	TRBV5-1*00(200)		TRBJ1-1*00(235)		427|442|463|0|15||75.0		21|40|68|23|42||95.0		NA	NA	NA	NA	NA	NA	NA	NA	NA	NA	TGCGCCAGCAGCTTGCTGGGTACGAACACTGAAGCTTTCTTT	21	NA	NA	NA	NA	NA	NA	NA	CASSLLGTNTEAFF	NA	:::::::::0:-1:15:::::23:-1:42:::
BM01	582	1	0.00934579	TGTGCCAGCAGTTACCAAGGACAGCAGCCCCAGCATTTT	DEED>D8CABEDD>7@EDDB?DB=@CE8@9B<CB?BECE	TRBV6-2*00(199),TRBV6-3*00(199),TRBV6-5*00(183),TRBV6-6*00(183)	TRBD1*00(30)	TRBJ1-5*00(215)		427|442|464|0|15||75.0;427|442|464|0|15||75.0;427|442|464|0|15||75.0;427|442|464|0|15||75.0	13|19|36|18|24||30.0	27|42|70|24|39||75.0		NA	NA	NA	NA	NA	NA	NA	NA	NA	NA	TGTGCCAGCAGTTACCAAGGACAGCAGCCCCAGCATTTT	22	NA	NA	NA	NA	NA	NA	NA	CASSYQGQQPQHF	NA	:::::::::0:-2:15:18:-1:-5:24:24:-7:39:::
BM01	584	1	0.00934579	TGTGCCAGCAGCATGACAGGGTCGGATGAAGCTTTCTTT	EEEB@EDEEEEE8DEBBCEEE<AEEADE@DEEEDEAEEE	TRBV6-1*00(195),TRBV6-5*00(195),TRBV6-6*00(195),TRBV6-2*00(179),TRBV6-3*00(179)	TRBD1*00(35)	TRBJ1-1*00(205)		427|438|464|0|11||55.0;427|438|464|0|11||55.0;427|438|464|0|11||55.0;427|438|464|0|11||55.0;427|438|464|0|11||55.0	14|21|36|14|21||35.0	27|40|68|26|39||65.0		NA	NA	NA	NA	NA	NA	NA	NA	NA	NA	TGTGCCAGCAGCATGACAGGGTCGGATGAAGCTTTCTTT	23	NA	NA	NA	NA	NA	NA	NA	CASSMTGSDEAFF	NA	:::::::::0:-6:11:14:-2:-3:21:26:-7:39:::
BM01	586	1	0.00934579	TGTGCCAGCAGCGCCTCAAGTTATTCACCCCTCCACTTT	EECDEEEEE<DECEE9EE@EC7EEAEEDEADEDEDECEE	TRBV6-1*00(195),TRBV6-5*00(195),TRBV6-6*00(195),TRBV6-2*00(179),TRBV6-3*00(179)		TRBJ1-6*00(225)		427|438|464|0|11||55.0;427|438|464|0|11||55.0;427|438|464|0|11||55.0;427|438|464|0|11||55.0;427|438|464|0|11||55.0		28|45|73|22|39||85.0		NA	NA	NA	NA	NA	NA	NA	NA	NA	NA	TGTGCCAGCAGCGCCTCAAGTTATTCACCCCTCCACTTT	22	NA	NA	NA	NA	NA	NA	NA	CASSASSYSPLHF	NA	:::::::::0:-6:11:::::22:-8:39:::
BM01	588	1	0.00934579	TGTGCCAGCACTGCCCAGGATACGCAGTATTTT	BBEDEEEEEEEECEEDEEEDE@DEEEEEEEEDE	TRBV6-1*00(205),TRBV6-5*00(205),TRBV6-6*00(205),TRBV6-2*00(189),TRBV6-3*00(189)		TRBJ2-3*00(215)		427|437|464|0|10||50.0;427|437|464|0|10||50.0;427|437|464|0|10||50.0;427|437|464|0|10||50.0;427|437|464|0|10||50.0		26|41|69|18|33||75.0		NA	NA	NA	NA	NA	NA	NA	NA	NA	NA	TGTGCCAGCACTGCCCAGGATACGCAGTATTTT	31	NA	NA	NA	NA	NA	NA	NA	CASTAQDTQYF	NA	:::::::::0:-7:10:::::18:-6:33:::
BM01	589	1	0.00934579	TGTGCCAGCAGCTCGAACAGGGTCGGCGAGCAGTACTTC	EDEEEEEEEEFEDEFEEEEEEEEEEEEEDEEDEEEEEC<	TRBV7-2*00(348),TRBV7-8*00(338)	TRBD1*00(30)	TRBJ2-7*00(205)		430|443|467|0|13||65.0;430|443|467|0|13||65.0	15|21|36|16|22||30.0	26|39|67|26|39||65.0		NA	NA	NA	NA	NA	NA	NA	NA	NA	NA	TGTGCCAGCAGCTCGAACAGGGTCGGCGAGCAGTACTTC	27	NA	NA	NA	NA	NA	NA	NA	CASSSNRVGEQYF	NA	:::::::::0:-4:13:16:-3:-3:22:26:-6:39:::
BM01	590	1	0.00934579	TGTGCCAGCAGCTTAGCAGGGACAGGCGGAAACACCATATATTTT	EBEDBECDECEEECCDDAEDCDDEBEDEDDEAEDBCEEEEDEEEE	TRBV7-6*00(195),TRBV7-7*00(179)	TRBD1*00(40)	TRBJ1-3*00(230)		430|447|467|0|17||85.0;430|447|467|0|17||85.0	12|20|36|18|26||40.0	24|42|70|27|45||90.0		NA	NA	NA	NA	NA	NA	NA	NA	NA	NA	TGTGCCAGCAGCTTAGCAGGGACAGGCGGAAACACCATATATTTT	32	NA	NA	NA	NA	NA	NA	NA	CASSLAGTGGNTIYF	NA	:::::::::0:0:17:18:0:-4:26:27:-4:45:::
BM01	591	1	0.00934579	TGTGCTAGCAGCTTAGATGCTCACAATGAGCAGTTCTTC	:CCC;A=A?<=CBC8?@6>9;;6BC6E>@D<?BA=>BBC	TRBV7-7*00(184),TRBV7-6*00(168)		TRBJ2-1*00(225)		430|446|467|0|16|SC435T|64.0;430|446|467|0|16|SC435T|64.0		25|42|70|22|39||85.0		NA	NA	NA	NA	NA	NA	NA	NA	NA	NA	TGTGCTAGCAGCTTAGATGCTCACAATGAGCAGTTCTTC	21	NA	NA	NA	NA	NA	NA	NA	CASSLDAHNEQFF	NA	:::::::::0:-1:16:::::22:-5:39:::
BM01	592	1	0.00934579	TGTGCCAGCAGCTCCGGGGTAGCGGGGACCTACGAGCAGTACTTC	FEEDEEFEEEEEFEEDEEEEEEEEEEEEFEFCEEEDEDEFBEEEE	TRBV9*00(353)	TRBD2*00(35)	TRBJ2-7*00(225)		427|439|463|0|12||60.0	21|28|48|19|26||35.0	22|39|67|28|45||85.0		NA	NA	NA	NA	NA	NA	NA	NA	NA	NA	TGTGCCAGCAGCTCCGGGGTAGCGGGGACCTACGAGCAGTACTTC	33	NA	NA	NA	NA	NA	NA	NA	CASSSGVAGTYEQYF	NA	:::::::::0:-4:12:19:-5:-4:26:28:-2:45:::
BM02	0	234	0.507592	TGTGCCAGCTCACCACTTGGACAGGGAATCTATGGCTACACCTTC	FFFFFFFFFEFFFFEFFFFFEFFFFFFFFFFFFFFFFEFFFFFFF	TRBV18*00(601.9)	TRBD1*00(40)	TRBJ1-2*00(219.9)		430|446|467|0|16||80.0	13|21|36|18|26||40.0	24|40|68|29|45||80.0		NA	NA	NA	NA	NA	NA	NA	NA	NA	NA	TGTGCCAGCTCACCACTTGGACAGGGAATCTATGGCTACACCTTC	36	NA	NA	NA	NA	NA	NA	NA	CASSPLGQGIYGYTF	NA	:::::::::0:-1:16:18:-1:-3:26:29:-4:45:::
BM02	1	110	0.238612	TGTGCCAGCAGAGGCTGGGGTAGGGATAGCACAGATACGCAGTATTTT	FFFFFFFFFFFFFFFFFFFFEFFFFFFFFFFFFFFFFFFFFFFFFFFF	TRBV12-3*00(247.6),TRBV12-4*00(247.6)		TRBJ2-3*00(249.9)		430|441|467|0|11||55.0;430|441|467|0|11||55.0		19|41|69|26|48||110.0		NA	NA	NA	NA	NA	NA	NA	NA	NA	NA	TGTGCCAGCAGAGGCTGGGGTAGGGATAGCACAGATACGCAGTATTTT	36	NA	NA	NA	NA	NA	NA	NA	CASRGWGRDSTDTQYF	NA	:::::::::0:-6:11:::::26:1:48:::
BM02	2	104	0.225597	TGTGCCAGCAGTGAAGGGGGAGGGATCTATGGCTACACCTTC	FFFFFFFFEFFFFFFFFFFFFFFFFEFFFFFFFEFFFFFFFF	TRBV6-2*00(236.9),TRBV6-3*00(236.9),TRBV6-1*00(225)	TRBD2*00(35),TRBD1*00(30)	TRBJ1-2*00(220)		427|439|464|0|12||60.0;427|439|464|0|12||60.0;427|443|464|0|16||80.0	25|32|48|17|24||35.0;17|23|36|14|20||30.0	24|40|68|26|42||80.0		NA	NA	NA	NA	NA	NA	NA	NA	NA	NA	TGTGCCAGCAGTGAAGGGGGAGGGATCTATGGCTACACCTTC	36	NA	NA	NA	NA	NA	NA	NA	CASSEGGGIYGYTF	NA	:::::::::0:-5:12:17:-9:0:24:26:-4:42:::
BM02	7	2	0.0043384	TGTGCCAGCAGTGTGGGACAGGAGAACACTGAAGCTTTCTTT	EEEE?6ECDDDEEEDEEEEE?DEEEBEDDEEEBDEDEDDEEE	TRBV6-1*00(190),TRBV6-5*00(185),TRBV6-6*00(185),TRBV6-2*00(169),TRBV6-3*00(169)	TRBD1*00(40)	TRBJ1-1*00(235)		427|440|464|0|13||65.0;427|439|464|0|12||60.0;427|439|464|0|12||60.0;427|439|464|0|12||60.0;427|439|464|0|12||60.0	12|20|36|14|22||40.0	21|40|68|23|42||95.0		NA	NA	NA	NA	NA	NA	NA	NA	NA	NA	TGTGCCAGCAGTGTGGGACAGGAGAACACTGAAGCTTTCTTT	21	NA	NA	NA	NA	NA	NA	NA	CASSVGQENTEAFF	NA	:::::::::0:-4:13:14:0:-4:22:23:-1:42:::
BM02	8	1	0.0021692	TGTGCCAGCGGCCACAGGGGCAACGAGCAGTACTTC	:DEEDDEECEEED>EEEEEEDEDECCEDEEDCCEEC	TRBV12-3*00(200),TRBV12-4*00(200)	TRBD1*00(35)	TRBJ2-7*00(210)		430|439|467|0|9||45.0;430|439|467|0|9||45.0	15|22|36|13|20||35.0	25|39|67|22|36||70.0		NA	NA	NA	NA	NA	NA	NA	NA	NA	NA	TGTGCCAGCGGCCACAGGGGCAACGAGCAGTACTTC	25	NA	NA	NA	NA	NA	NA	NA	CASGHRGNEQYF	NA	:::::::::0:-8:9:13:-3:-2:20:22:-5:36:::
BM02	9	1	0.0021692	TGTGCCAGTAGTCTGGCGGGAGCGGGGTTTGAGCAGTTCTTC	EEE:D9EEEEEDAEEE?EEEACEEEEEDEEEEDDECEEEEDB	TRBV19*00(165)	TRBD2*00(35)	TRBJ2-1*00(205)		427|439|464|0|12||60.0	23|30|48|15|22||35.0	29|42|70|29|42||65.0		NA	NA	NA	NA	NA	NA	NA	NA	NA	NA	TGTGCCAGTAGTCTGGCGGGAGCGGGGTTTGAGCAGTTCTTC	24	NA	NA	NA	NA	NA	NA	NA	CASSLAGAGFEQFF	NA	:::::::::0:-5:12:15:-7:-2:22:29:-9:42:::
BM02	10	1	0.0021692	TGTGCCAGTAGTAGAGGGACAGGGACCTACAATGAGCAGTTCTTC	EEEDEEEDEEEEEEEEEEDDEEEEDEEBCEEDEEEEEEEDAEEEB	TRBV19*00(155)	TRBD1*00(45)	TRBJ2-1*00(240)		427|440|464|0|13||65.0	12|21|36|15|24||45.0	22|42|70|25|45||100.0		NA	NA	NA	NA	NA	NA	NA	NA	NA	NA	TGTGCCAGTAGTAGAGGGACAGGGACCTACAATGAGCAGTTCTTC	32	NA	NA	NA	NA	NA	NA	NA	CASSRGTGTYNEQFF	NA	:::::::::0:-4:13:15:0:-3:24:25:-2:45:::
BM02	12	1	0.0021692	TGCAGCGTTGAAGGGAGTGAAGCTTTCTTT	E@EEEBEDED@DDBD@DDBDDDAEDC@ED;	TRBV29-1*00(250)		TRBJ1-1*00(205)		421|434|455|0|13||65.0		27|40|68|17|30||65.0		NA	NA	NA	NA	NA	NA	NA	NA	NA	NA	TGCAGCGTTGAAGGGAGTGAAGCTTTCTTT	26	NA	NA	NA	NA	NA	NA	NA	CSVEGSEAFF	NA	:::::::::0:-1:13:::::17:-7:30:::
BM02	13	1	0.0021692	TGTGCCAGCAGCGAAGGACATTACTATGGCTACACCTTC	EE?DEC6@EEEEECEA:<DECD?EADDEDED<C8E?=EC	TRBV5-8*00(200),TRBV5-4*00(184)	TRBD1*00(25)	TRBJ1-2*00(225)		427|439|463|0|12||60.0;427|439|463|0|12||60.0	13|18|36|15|20||25.0	23|40|68|22|39||85.0		NA	NA	NA	NA	NA	NA	NA	NA	NA	NA	TGTGCCAGCAGCGAAGGACATTACTATGGCTACACCTTC	21	NA	NA	NA	NA	NA	NA	NA	CASSEGHYYGYTF	NA	:::::::::0:-4:12:15:-1:-6:20:22:-3:39:::
BM02	15	1	0.0021692	TGTGCCAGCAGCCGGGACAGGGGGCCAGATACGCAGTATTTT	EEEE@EE>DDE@DE@B?CE@EEDEE?EEEEEE8D@87DE?ED	TRBV6-1*00(216),TRBV6-5*00(216),TRBV6-8*00(216),TRBV6-6*00(200),TRBV6-2*00(190)	TRBD1*00(70)	TRBJ2-3*00(150)		427|438|464|0|11||55.0;427|438|464|0|11||55.0;424|435|461|0|11||55.0;427|438|464|0|11||55.0;427|438|464|0|11||55.0	10|24|36|11|25||70.0	24|41|69|25|42||85.0		NA	NA	NA	NA	NA	NA	NA	NA	NA	NA	TGTGCCAGCAGCCGGGACAGGGGGCCAGATACGCAGTATTTT	22	NA	NA	NA	NA	NA	NA	NA	CASSRDRGPDTQYF	NA	:::::::::0:-6:11:11:2:0:25:25:-4:42:::
BM02	16	1	0.0021692	TGTGCCAGCGAACTAGCGGGGAGTACCACAGATACGCAGTATTTT	EEEE;DCE?ED==EAD>EDDDDEE7EEDEDCEEBECDAEEDEEDE	TRBV6-1*00(140),TRBV6-5*00(140),TRBV6-6*00(140),TRBV10-3*00(130)	TRBD2*00(45)	TRBJ2-3*00(235)		427|436|464|0|9||45.0;427|436|464|0|9||45.0;427|436|464|0|9||45.0;427|434|464|0|7||35.0	19|28|48|11|20||45.0	22|41|69|26|45||95.0		NA	NA	NA	NA	NA	NA	NA	NA	NA	NA	TGTGCCAGCGAACTAGCGGGGAGTACCACAGATACGCAGTATTTT	22	NA	NA	NA	NA	NA	NA	NA	CASELAGSTTDTQYF	NA	:::::::::0:-8:9:11:-3:-4:20:26:-2:45:::
BM02	17	1	0.0021692	TGTGCCAGCAGCTTAGAGGGGCCCCGTGGCTACACCTTC	EEED8E@DBEA@EDBDDCD>CDA:AEEDADC6D<=DDDC	TRBV7-2*00(220),TRBV7-8*00(204)	TRBD2*00(30)	TRBJ1-2*00(205)		430|446|467|0|16||80.0;430|446|467|0|16||80.0	29|35|48|18|24||30.0	27|40|68|26|39||65.0		NA	NA	NA	NA	NA	NA	NA	NA	NA	NA	TGTGCCAGCAGCTTAGAGGGGCCCCGTGGCTACACCTTC	21	NA	NA	NA	NA	NA	NA	NA	CASSLEGPRGYTF	NA	:::::::::0:-1:16:18:-13:3:24:26:-7:39:::
BM02	18	1	0.0021692	TGTGCCAGCAGCTTAGCCTACCCACGCTACGAGCAGTACTTC	DDCADBEED?DE=DDDEEB8EEEDECDECDEDED@EDBDDCD	TRBV7-2*00(194),TRBV7-8*00(178)		TRBJ2-7*00(220)		430|447|467|0|17||85.0;430|447|467|0|17||85.0		23|39|67|26|42||80.0		NA	NA	NA	NA	NA	NA	NA	NA	NA	NA	TGTGCCAGCAGCTTAGCCTACCCACGCTACGAGCAGTACTTC	23	NA	NA	NA	NA	NA	NA	NA	CASSLAYPRYEQYF	NA	:::::::::0:0:17:::::26:-3:42:::
BM02	19	1	0.0021692	TGTGCCAGCAGCTTCGGTCCTCCCTACGAGCAGTACTTC	BDEDEE@EEDEBCDEBD>EEDB:EDCEE@CEDEEBECCE	TRBV7-6*00(210),TRBV7-7*00(194)		TRBJ2-7*00(225)		430|444|467|0|14||70.0;430|444|467|0|14||70.0		22|39|67|22|39||85.0		NA	NA	NA	NA	NA	NA	NA	NA	NA	NA	TGTGCCAGCAGCTTCGGTCCTCCCTACGAGCAGTACTTC	25	NA	NA	NA	NA	NA	NA	NA	CASSFGPPYEQYF	NA	:::::::::0:-3:14:::::22:-2:39:::
BM02	20	1	0.0021692	TGTGCCAGCAGCTTCCGGACAGCGGAGAACACTGAAGCTTTCTTT	FEEEEEEEEEEEEFEEEEFEEECEEEEEEEFEEEEEEEEEEEFEE	TRBV7-8*00(343),TRBV7-2*00(321)	TRBD1*00(30)	TRBJ1-1*00(235)		430|444|467|0|14||70.0;430|444|467|0|14||70.0	13|19|36|16|22||30.0	21|40|68|26|45||95.0		NA	NA	NA	NA	NA	NA	NA	NA	NA	NA	TGTGCCAGCAGCTTCCGGACAGCGGAGAACACTGAAGCTTTCTTT	34	NA	NA	NA	NA	NA	NA	NA	CASSFRTAENTEAFF	NA	:::::::::0:-3:14:16:-1:-5:22:26:-1:45:::
BM03	19	5	0.0793651	TGTGCCAGCAGTTATCAGGGGGCCACTGAAGCTTTCTTT	EEEEFEEEFFEEFEEEEEEEEEEFEFEEEFEEEEFEEEF	TRBV6-1*00(237),TRBV6-6*00(231),TRBV6-9*00(228)	TRBD1*00(40)	TRBJ1-1*00(200)		427|439|464|0|12||60.0;427|441|464|0|14||70.0;427|442|464|0|15||75.0	16|24|36|15|23||40.0	24|40|68|23|39||80.0		NA	NA	NA	NA	NA	NA	NA	NA	NA	NA	TGTGCCAGCAGTTATCAGGGGGCCACTGAAGCTTTCTTT	36	NA	NA	NA	NA	NA	NA	NA	CASSYQGATEAFF	NA	:::::::::0:-5:12:15:-4:0:23:23:-4:39:::
BM03	20	5	0.0793651	TGTGCCAGCAGCTTAACCGGGGCGGGAGGTGGAAACACCATATATTTT	FEFEEEEEEEFEEEEEEEEFEFEEEFEEFEFFEEEEEEFEEFEEEEEE	TRBV7-3*00(374)	TRBD2*00(40)	TRBJ1-3*00(235)		430|447|467|0|17||85.0	23|31|48|21|29||40.0	23|42|70|29|48||95.0		NA	NA	NA	NA	NA	NA	NA	NA	NA	NA	TGTGCCAGCAGCTTAACCGGGGCGGGAGGTGGAAACACCATATATTTT	36	NA	NA	NA	NA	NA	NA	NA	CASSLTGAGGGNTIYF	NA	:::::::::0:0:17:21:-7:-1:29:29:-3:48:::
BM03	102	3	0.047619	TGTGCCAGCAGCGCCTTTTCCGGGCGGGGGTTGAATGAGCAGTTCTTC	FEEEEEEFEEEEEECEEEEEEEEFEEEEEFCEECEEFEFEEFEEEEEE	TRBV11-1*00(162),TRBV11-3*00(146)	TRBD1*00(25),TRBD2*00(25)	TRBJ2-1*00(215)	TRBC2*00(225)	430|442|467|0|12||60.0;430|442|467|0|12||60.0	10|15|36|19|24||25.0;14|19|48|19|24||25.0	27|42|70|33|48||75.0		NA	NA	NA	NA	NA	NA	NA	NA	NA	NA	TGTGCCAGCAGCGCCTTTTCCGGGCGGGGGTTGAATGAGCAGTTCTTC	34	NA	NA	NA	NA	NA	NA	NA	CASSAFSGRGLNEQFF	NA	:::::::::0:-5:12:19:2:-9:24:33:-7:48:::
BM03	103	3	0.047619	TGTGCCAGCTCACCGGGGGGTGACTATGGCTACACCTTC	EEEEEEEEEBECEEEEEEEEEEEFEEEFEEEDEEEEEEE	TRBV18*00(604)	TRBD1*00(25)	TRBJ1-2*00(209)		430|444|467|0|14||70.0	18|23|36|14|19||25.0	23|40|68|22|39||85.0		NA	NA	NA	NA	NA	NA	NA	NA	NA	NA	TGTGCCAGCTCACCGGGGGGTGACTATGGCTACACCTTC	33	NA	NA	NA	NA	NA	NA	NA	CASSPGGDYGYTF	NA	:::::::::0:-3:14:14:-6:-1:19:22:-3:39:::
BM03	104	3	0.047619	TGTGCCAGCAGTTCGGGGGTGATGCTCCGGCAGCCCCAGCATTTT	FFEFFFEFEEFEFEEFEFFEFEFFEFEFEFEEFFFEFEEFFFFFE	TRBV28*00(269)	TRBD1*00(25)	TRBJ1-5*00(215)		427|440|464|0|13||65.0	18|23|36|14|19||25.0	27|42|70|30|45||75.0		NA	NA	NA	NA	NA	NA	NA	NA	NA	NA	TGTGCCAGCAGTTCGGGGGTGATGCTCCGGCAGCCCCAGCATTTT	36	NA	NA	NA	NA	NA	NA	NA	CASSSGVMLRQPQHF	NA	:::::::::0:-4:13:14:-6:-1:19:30:-7:45:::
BM03	105	3	0.047619	TGTGCCTGGAGCGAGGGACTAGGAGCCGGGGAGCTGTTTTTT	EFEEEEDFEEEEEDFEEEEEEEEEEECFEEEEEEEEEEEEEE	TRBV30*00(573)	TRBD2*00(40)	TRBJ2-2*00(225)		421|432|455|0|11||55.0	16|24|48|14|22||40.0	26|43|71|25|42||85.0		NA	NA	NA	NA	NA	NA	NA	NA	NA	NA	TGTGCCTGGAGCGAGGGACTAGGAGCCGGGGAGCTGTTTTTT	34	NA	NA	NA	NA	NA	NA	NA	CAWSEGLGAGELFF	NA	:::::::::0:-3:11:14:0:-8:22:25:-6:42:::
BM03	106	3	0.047619	TGTGCCAGCAGACAGGGGACCCGGGAGACCCAGTACTTC	EEEFEFEFEEEEEEEEEEEEEEEEFEEEEEEEEEEEEFF	TRBV6-1*00(223.3),TRBV6-5*00(223.3),TRBV6-8*00(223.3),TRBV6-6*00(207.3)	TRBD1*00(35)	TRBJ2-5*00(215)		427|438|464|0|11||55.0;427|438|464|0|11||55.0;424|435|461|0|11||55.0;427|438|464|0|11||55.0	15|22|36|11|18||35.0	25|40|68|24|39||75.0		NA	NA	NA	NA	NA	NA	NA	NA	NA	NA	TGTGCCAGCAGACAGGGGACCCGGGAGACCCAGTACTTC	36	NA	NA	NA	NA	NA	NA	NA	CASRQGTRETQYF	NA	:::::::::0:-6:11:11:-3:-2:18:24:-5:39:::
BM03	194	2	0.031746	TGTGCCAGCAGCTTTGCGTGGACAGCACAAGAGACCCAGTACTTC	EFEEEFEEEEEEEEFEEEEFEEEEEEEEEEEEEEEEEEEEEFEEF	TRBV11-2*00(423),TRBV11-3*00(391)	TRBD1*00(30)	TRBJ2-5*00(230)		430|444|467|0|14||70.0;430|444|467|0|14||70.0	13|19|36|19|25||30.0	22|40|68|27|45||90.0		NA	NA	NA	NA	NA	NA	NA	NA	NA	NA	TGTGCCAGCAGCTTTGCGTGGACAGCACAAGAGACCCAGTACTTC	36	NA	NA	NA	NA	NA	NA	NA	CASSFAWTAQETQYF	NA	:::::::::0:-3:14:19:-1:-5:25:27:-2:45:::
BM03	195	2	0.031746	TGTGCCAGCAGTTTAGTTTCCAGCACGAATGAGCAGTTCTTC	EEEEFEEEEEEFEEEEFEEFEEEEEEEFEEEEFEEFEEEFFE	TRBV12-3*00(273),TRBV12-4*00(273)		TRBJ2-1*00(215)		430|446|467|0|16||80.0;430|446|467|0|16||80.0		27|42|70|27|42||75.0		NA	NA	NA	NA	NA	NA	NA	NA	NA	NA	TGTGCCAGCAGTTTAGTTTCCAGCACGAATGAGCAGTTCTTC	36	NA	NA	NA	NA	NA	NA	NA	CASSLVSSTNEQFF	NA	:::::::::0:-1:16:::::27:-7:42:::
BM03	197	2	0.031746	TGTGCCAGCAGCCGGTGGGACAGAAGTTACTATGGCTACACCTTC	EEEEEEBCED>EEFEEFEEDEFEEDEEEEEEEEEEEEEFEEEFD@	TRBV3-1*00(525),TRBV3-2*00(477)	TRBD1*00(35)	TRBJ1-2*00(201)		427|440|464|0|13||65.0;427|440|464|0|13||65.0	12|19|36|16|23||35.0	23|40|68|28|45||85.0		NA	NA	NA	NA	NA	NA	NA	NA	NA	NA	TGTGCCAGCAGCCGGTGGGACAGAAGTTACTATGGCTACACCTTC	29	NA	NA	NA	NA	NA	NA	NA	CASSRWDRSYYGYTF	NA	:::::::::0:-4:13:16:0:-5:23:28:-3:45:::
BM03	198	2	0.031746	TGTGCCTGGAGCGGTTCGGGCGAAAAACTGTTTTTT	EEEEEEEEEEEEEEEEEEEEEEEEEEEEEEEEEEEE	TRBV30*00(573)		TRBJ1-4*00(205)		421|432|455|0|11||55.0		28|43|71|21|36||75.0		NA	NA	NA	NA	NA	NA	NA	NA	NA	NA	TGTGCCTGGAGCGGTTCGGGCGAAAAACTGTTTTTT	36	NA	NA	NA	NA	NA	NA	NA	CAWSGSGEKLFF	NA	:::::::::0:-3:11:::::21:-8:36:::
BM03	199	2	0.031746	TGTGCCAGCTGGGACAGGGAAGGAGGCTACACCTTC	FFEEEFEFEEFFEEEEFEFEFFEEFFEFEFEFEFFE	TRBV6-4*00(238)	TRBD1*00(45)	TRBJ1-2*00(200)		427|436|464|0|9||45.0	12|21|36|10|19||45.0	28|40|68|24|36||60.0		NA	NA	NA	NA	NA	NA	NA	NA	NA	NA	TGTGCCAGCTGGGACAGGGAAGGAGGCTACACCTTC	36	NA	NA	NA	NA	NA	NA	NA	CASWDREGGYTF	NA	:::::::::0:-8:9:10:0:-3:19:24:-8:36:::
BM03	200	2	0.031746	TGTGCCAGCAGATCCGACAGGGCGACGGTTGGTGGCTACACCTTC	EEEEEFEEEFEEFEEEEEEEEEEEEEFFEEEEEEFEEEEEFFEEE	TRBV6-1*00(216),TRBV6-5*00(216),TRBV6-8*00(216),TRBV6-2*00(190),TRBV6-3*00(190)	TRBD1*00(35)	TRBJ1-2*00(205)		427|438|464|0|11||55.0;427|438|464|0|11||55.0;424|435|461|0|11||55.0;427|438|464|0|11||55.0;427|438|464|0|11||55.0	14|21|36|15|22||35.0	27|40|68|32|45||65.0		NA	NA	NA	NA	NA	NA	NA	NA	NA	NA	TGTGCCAGCAGATCCGACAGGGCGACGGTTGGTGGCTACACCTTC	36	NA	NA	NA	NA	NA	NA	NA	CASRSDRATVGGYTF	NA	:::::::::0:-6:11:15:-2:-3:22:32:-7:45:::
BM03	201	2	0.031746	TGTGCCAGCAGCCTCGGACACTCCTACGAGCAGTACTTC	EEEEFEEEEEEEFEFEEEEEFEFEEDEEEEEEEEEFEFE	TRBV6-1*00(232),TRBV6-5*00(232),TRBV6-8*00(232)	TRBD1*00(25)	TRBJ2-7*00(235)		427|438|464|0|11||55.0;427|438|464|0|11||55.0;424|435|461|0|11||55.0	13|18|36|15|20||25.0	20|39|67|20|39||95.0		NA	NA	NA	NA	NA	NA	NA	NA	NA	NA	TGTGCCAGCAGCCTCGGACACTCCTACGAGCAGTACTTC	35	NA	NA	NA	NA	NA	NA	NA	CASSLGHSYEQYF	NA	:::::::::0:-6:11:15:-1:-6:20:20:0:39:::
BM03	203	2	0.031746	TGTGCCAGCAGCTGGACAGGGGGCCGAGGCTACACCTTC	EFEEFFEEEEEEEEEEEEFEEEFFFEEEFEEEEEFEEEE	TRBV7-2*00(364),TRBV7-8*00(322)	TRBD1*00(55)	TRBJ1-2*00(200)		430|443|467|0|13||65.0;430|443|467|0|13||65.0	13|24|36|13|24||55.0	28|40|68|27|39||60.0		NA	NA	NA	NA	NA	NA	NA	NA	NA	NA	TGTGCCAGCAGCTGGACAGGGGGCCGAGGCTACACCTTC	36	NA	NA	NA	NA	NA	NA	NA	CASSWTGGRGYTF	NA	:::::::::0:-4:13:13:-1:0:24:27:-8:39:::
BM03	325	1	0.015873	TGCGCCAGCGGGAAGACAAATTTGGGGGAAAAACTGTTTTTT	EEEEEEEEDEEEEEEAEEDEEEFEEEEEEEEE>EEEEEEEEE	TRBV10-1*00(253)		TRBJ1-4*00(205)		427|436|464|0|9||45.0		28|43|71|27|42||75.0		NA	NA	NA	NA	NA	NA	NA	NA	NA	NA	TGCGCCAGCGGGAAGACAAATTTGGGGGAAAAACTGTTTTTT	29	NA	NA	NA	NA	NA	NA	NA	CASGKTNLGEKLFF	NA	:::::::::0:-8:9:::::27:-8:42:::
BM03	326	1	0.015873	TGCGCCAGCAGTGACCATACCTCGGTTAGCACAGATACGCAGTATTTT	EEEEEFEEEEEEFEEFEFEEFEEEEEEEEEEEEEEEEEEEEEEFEEEE	TRBV10-1*00(278)		TRBJ2-3*00(250)		427|441|464|0|14||70.0		19|41|69|26|48||110.0		NA	NA	NA	NA	NA	NA	NA	NA	NA	NA	TGCGCCAGCAGTGACCATACCTCGGTTAGCACAGATACGCAGTATTTT	36	NA	NA	NA	NA	NA	NA	NA	CASSDHTSVSTDTQYF	NA	:::::::::0:-3:14:::::26:1:48:::
BM03	327	1	0.015873	TGTGCCAGCAGCCGCCCGACTAGTTGGGAGCAGTTCTTC	EEEEEEEEEDEEEEEEEEEEEEEEEFEEFFEFFEEFEEE	TRBV12-3*00(184),TRBV12-4*00(184)	TRBD2*00(30)	TRBJ2-1*00(200)		430|441|467|0|11||55.0;430|441|467|0|11||55.0	18|24|48|17|23||30.0	30|42|70|27|39||60.0		NA	NA	NA	NA	NA	NA	NA	NA	NA	NA	TGTGCCAGCAGCCGCCCGACTAGTTGGGAGCAGTTCTTC	35	NA	NA	NA	NA	NA	NA	NA	CASSRPTSWEQFF	NA	:::::::::0:-6:11:17:-2:-8:23:27:-10:39:::
BM03	328	1	0.015873	TGTGCCAGCAGTCTCCAACTCAAGCAGTACTTC	FFEEEEEEEFEEFEFDEEFEEEFFEEEEEEEEF	TRBV12-3*00(189),TRBV12-4*00(189)		TRBJ2-7*00(115),TRBJ1-1*00(110)		430|442|467|0|12||60.0;430|442|467|0|12||60.0		28|39|67|22|33||55.0;36|40|68|29|33|ST39C|4.0		NA	NA	NA	NA	NA	NA	NA	NA	NA	NA	TGTGCCAGCAGTCTCCAACTCAAGCAGTACTTC	35	NA	NA	NA	NA	NA	NA	NA	CASSLQLKQYF	NA	:::::::::0:-5:12:::::22:-8:33:::
BM03	330	1	0.015873	TGTGCCAGCAGCCACTACGACAGGCACAAGAGGTACTACGAGCAGTACTTC	EE?EEEDEEEEEE@EDEEEDEDEEEEEEEEBEEEEEEEEEEDEEEEAEDDF	TRBV14*00(363)	TRBD1*00(30)	TRBJ2-7*00(220)		430|444|467|0|14||70.0	14|20|36|18|24||30.0	23|39|67|35|51||80.0		NA	NA	NA	NA	NA	NA	NA	NA	NA	NA	TGTGCCAGCAGCCACTACGACAGGCACAAGAGGTACTACGAGCAGTACTTC	30	NA	NA	NA	NA	NA	NA	NA	CASSHYDRHKRYYEQYF	NA	:::::::::0:-3:14:18:-2:-4:24:35:-3:51:::
BM03	331	1	0.015873	TGTGCCAGTAGTGCCCTTCGGACAGGCCGCTGGTTGATTATGAACACTGAAGCTTTCTTT	EEEFEEEFDFEFEEEEEFFEEEEEEEEEEEFEFEEEEFEEFFEEEEEEEFEEEFFFEEEE	TRBV19*00(324)	TRBD1*00(35)	TRBJ1-1*00(245)		427|439|464|0|12||60.0	13|20|36|19|26||35.0	19|40|68|39|60||105.0		NA	NA	NA	NA	NA	NA	NA	NA	NA	NA	TGTGCCAGTAGTGCCCTTCGGACAGGCCGCTGGTTGATTATGAACACTGAAGCTTTCTTT	35	NA	NA	NA	NA	NA	NA	NA	CASSALRTGRWLIMNTEAFF	NA	:::::::::0:-5:12:19:-1:-4:26:39:1:60:::
BM03	332	1	0.015873	TGTGCCAGTAAGCCCCGGGCAGGGGGCCTAGGGATAGAAAAACTGTTTTTT	EEEEEEEEEECEEEEEEEEEDEEEEEEEEEEEEEDEEEEEEEEEEEEDEEE	TRBV19*00(314)	TRBD1*00(49)	TRBJ1-4*00(205)		427|437|464|0|10||50.0	9|24|36|13|27|DA15|49.0	28|43|71|36|51||75.0		NA	NA	NA	NA	NA	NA	NA	NA	NA	NA	TGTGCCAGTAAGCCCCGGGCAGGGGGCCTAGGGATAGAAAAACTGTTTTTT	34	NA	NA	NA	NA	NA	NA	NA	CASKPRAGGLGIEKLFF	NA	:::::::::0:-7:10:13:3:0:27:36:-8:51:::
BM03	333	1	0.015873	TGCAGTGCCGCAGCGGCAATCCAAGAGACCCAGTACTTC	EEEEEEFEFEEEEEEEEEEDEEEFEEDEEEBEEECEEEB	TRBV20-1*00(378)	TRBD2*00(25)	TRBJ2-5*00(235)		421|429|455|0|8||40.0	22|27|48|11|16||25.0	21|40|68|20|39||95.0		NA	NA	NA	NA	NA	NA	NA	NA	NA	NA	TGCAGTGCCGCAGCGGCAATCCAAGAGACCCAGTACTTC	33	NA	NA	NA	NA	NA	NA	NA	CSAAAAIQETQYF	NA	:::::::::0:-6:8:11:-6:-5:16:20:-1:39:::
BM03	334	1	0.015873	TGTGCCACCAGTGATGTGACTAAGAGCCTGAGCTCCTACAATGAGCAGTTCTTC	EEEEFEEEEEEEEDEEEEEEEEDEEEEEFEDEEEEEEEEFEFEEEEEEEEEDEE	TRBV24-1*00(298)	TRBD2*00(25)	TRBJ2-1*00(265)		427|442|465|0|15||75.0	18|23|48|17|22||25.0	17|42|70|29|54||125.0		NA	NA	NA	NA	NA	NA	NA	NA	NA	NA	TGTGCCACCAGTGATGTGACTAAGAGCCTGAGCTCCTACAATGAGCAGTTCTTC	35	NA	NA	NA	NA	NA	NA	NA	CATSDVTKSLSSYNEQFF	NA	:::::::::0:-3:15:17:-2:-9:22:29:3:54:::
BM03	335	1	0.015873	TGTGCCACCAGTGTCCCTAGCGGGAGGGCTGGAGATACGCAGTATTTT	EEEEEFEEEEEEEEEEEEEFEEEFEEEEEEEFEEEEDDEEEEEEEFDE	TRBV24-1*00(288)	TRBD2*00(65)	TRBJ2-3*00(220)		427|440|465|0|13||65.0	20|33|48|16|29||65.0	25|41|69|32|48||80.0		NA	NA	NA	NA	NA	NA	NA	NA	NA	NA	TGTGCCACCAGTGTCCCTAGCGGGAGGGCTGGAGATACGCAGTATTTT	35	NA	NA	NA	NA	NA	NA	NA	CATSVPSGRAGDTQYF	NA	:::::::::0:-5:13:16:-4:1:29:32:-5:48:::
BM03	336	1	0.015873	TGTGCCAGCAGTGCTACTAGCGGCCTGGGGACCGGGGAGCTGTTTTTT	EEFEEEEEEEDEFF@DEEEDFEFEEEEEEE?EEFFDDEEEEEEEEEEE	TRBV25-1*00(200)	TRBD2*00(40)	TRBJ2-2*00(230)		427|440|464|0|13||65.0	19|27|48|15|23||40.0	25|43|71|30|48||90.0		NA	NA	NA	NA	NA	NA	NA	NA	NA	NA	TGTGCCAGCAGTGCTACTAGCGGCCTGGGGACCGGGGAGCTGTTTTTT	30	NA	NA	NA	NA	NA	NA	NA	CASSATSGLGTGELFF	NA	:::::::::0:-4:13:15:-3:-5:23:30:-5:48:::
BM03	337	1	0.015873	TGTGCCAGCAGTTTGAGAGGGTTGTCGAACACTGAAGCTTTCTTT	FEEEEEEEEEEFEFFEFEFFEEEFEEEEEFEEFEEFEFEEEFEEE	TRBV27*00(263)	TRBD2*00(25)	TRBJ1-1*00(155)		427|441|464|0|14||70.0	27|32|48|16|21||25.0	21|40|68|26|45||95.0		NA	NA	NA	NA	NA	NA	NA	NA	NA	NA	TGTGCCAGCAGTTTGAGAGGGTTGTCGAACACTGAAGCTTTCTTT	36	NA	NA	NA	NA	NA	NA	NA	CASSLRGLSNTEAFF	NA	:::::::::0:-3:14:16:-11:0:21:26:-1:45:::
BM03	338	1	0.015873	TGTGCCAGCAGTTTACTTAGCGGTCAGTTCTTC	EDEEFEEEEFFFEFEFEEEEFEFEFFEEFEEEE	TRBV28*00(279)	TRBD2*00(30)	TRBJ2-1*00(185)		427|442|464|0|15||75.0	21|27|48|17|23||30.0	33|42|70|24|33||45.0		NA	NA	NA	NA	NA	NA	NA	NA	NA	NA	TGTGCCAGCAGTTTACTTAGCGGTCAGTTCTTC	35	NA	NA	NA	NA	NA	NA	NA	CASSLLSGQFF	NA	:::::::::0:-2:15:17:-5:-5:23:24:-13:33:::
BM03	339	1	0.015873	TGTGCCTGGAGTCTGCGACAGAAACTATATATGAACACTGAAGCTTTCTTT	FEEEEEEEEEEEEDEEEEEEEFEEEEEEEEEEEEEEEEEEEEEEEEEEEEE	TRBV30*00(562)	TRBD1*00(25)	TRBJ1-1*00(245)		421|433|455|0|12||60.0	14|19|36|16|21||25.0	19|40|68|30|51||105.0		NA	NA	NA	NA	NA	NA	NA	NA	NA	NA	TGTGCCTGGAGTCTGCGACAGAAACTATATATGAACACTGAAGCTTTCTTT	35	NA	NA	NA	NA	NA	NA	NA	CAWSLRQKLYMNTEAFF	NA	:::::::::0:-2:12:16:-2:-5:21:30:1:51:::
BM03	340	1	0.015873	TGTGCCTGGAGTGTAACAGGGGCCTATGGCTACACCTTC	EEEDEEEEEEEDEEDEEEEEEEEEECEEEEEEEEEEEEE	TRBV30*00(593)	TRBD1*00(35)	TRBJ1-2*00(220)		421|436|455|0|15||75.0	15|22|36|15|22||35.0	24|40|68|23|39||80.0		NA	NA	NA	NA	NA	NA	NA	NA	NA	NA	TGTGCCTGGAGTGTAACAGGGGCCTATGGCTACACCTTC	34	NA	NA	NA	NA	NA	NA	NA	CAWSVTGAYGYTF	NA	:::::::::0:1:15:15:-3:-2:22:23:-4:39:::
BM03	341	1	0.015873	TGCGCCAGTAACGACGGGGGAAATTCACCCCTCCACTTT	FEEEEEFEEEEFEEFFEEEEEEEEEFEEEEFEEFEEEFE	TRBV5-1*00(373)	TRBD1*00(25)	TRBJ1-6*00(214)		427|435|463|0|8||40.0	18|23|36|15|20||25.0	27|45|73|21|39||90.0		NA	NA	NA	NA	NA	NA	NA	NA	NA	NA	TGCGCCAGTAACGACGGGGGAAATTCACCCCTCCACTTT	36	NA	NA	NA	NA	NA	NA	NA	CASNDGGNSPLHF	NA	:::::::::0:-8:8:15:-6:-1:20:21:-7:39:::
BM03	342	1	0.015873	TGTGCCAGCAGAACCGGGAGGTATAATTCACCCCTCCACTTT	EFEEEEFFEFEEEFEFFFEFFDEEEFFFFEEEFEEFEEFEFF	TRBV6-2*00(232),TRBV6-3*00(232)	TRBD2*00(35),TRBD1*00(30)	TRBJ1-6*00(229)		427|438|464|0|11||55.0;427|438|464|0|11||55.0	24|31|48|14|21||35.0;10|16|36|13|19||30.0	24|45|73|21|42||105.0		NA	NA	NA	NA	NA	NA	NA	NA	NA	NA	TGTGCCAGCAGAACCGGGAGGTATAATTCACCCCTCCACTTT	35	NA	NA	NA	NA	NA	NA	NA	CASRTGRYNSPLHF	NA	:::::::::0:-6:11:14:-8:-1:21:21:-4:42:::
BM03	343	1	0.015873	TGTGCCAGCAGTATTTGGGTAGGCACAGATACGCAGTATTTT	EEEEEEEEEEEEEEEFEEEEEFEEEFFEEEEEEEEFEEEFEF	TRBV6-1*00(237),TRBV6-5*00(237),TRBV6-8*00(237),TRBV6-6*00(221)		TRBJ2-3*00(240)		427|439|464|0|12||60.0;427|439|464|0|12||60.0;424|436|461|0|12||60.0;427|439|464|0|12||60.0		21|41|69|22|42||100.0		NA	NA	NA	NA	NA	NA	NA	NA	NA	NA	TGTGCCAGCAGTATTTGGGTAGGCACAGATACGCAGTATTTT	36	NA	NA	NA	NA	NA	NA	NA	CASSIWVGTDTQYF	NA	:::::::::0:-5:12:::::22:-1:42:::
BM03	344	1	0.015873	TGTGCCAGCAGTTACCCCAGTGAGGGGCGGGAAGAGACACAGTACTTC	EDEEEEEEEEEEDEEEEEEFEFEFEEFDEFEEFEEEEEEEFEEEEEEE	TRBV6-7*00(188)	TRBD1*00(30)	TRBJ2-5*00(209)		427|442|464|0|15||75.0	19|25|36|23|29||30.0	23|40|68|31|48|SC30A|69.0		NA	NA	NA	NA	NA	NA	NA	NA	NA	NA	TGTGCCAGCAGTTACCCCAGTGAGGGGCGGGAAGAGACACAGTACTTC	35	NA	NA	NA	NA	NA	NA	NA	CASSYPSEGREETQYF	NA	:::::::::0:-2:15:23:-7:1:29:31:-3:48:::
BM03	345	1	0.015873	TGTGCCAGCAGCTCTGGACTTGGAAACACCATATATTTT	EEFEEEEEEEEEEEEEEEEFEEEEEEFEEEEFEEEEEEE	TRBV7-2*00(332),TRBV7-8*00(322)	TRBD2*00(25)	TRBJ1-3*00(235)		430|443|467|0|13||65.0;430|443|467|0|13||65.0	17|22|48|15|20||25.0	23|42|70|20|39||95.0		NA	NA	NA	NA	NA	NA	NA	NA	NA	NA	TGTGCCAGCAGCTCTGGACTTGGAAACACCATATATTTT	36	NA	NA	NA	NA	NA	NA	NA	CASSSGLGNTIYF	NA	:::::::::0:-4:13:15:-1:-10:20:20:-3:39:::
BM03	346	1	0.015873	TGTGCCAGCAGCTTTAGCCGCAACCAAGAGACCCAGTACTTC	FEEEEEEEEEEEEEEDEEEEEEEFEEFEEEEFEEEEEDEEDE	TRBV7-2*00(353),TRBV7-8*00(311)		TRBJ2-5*00(240)		430|444|467|0|14||70.0;430|444|467|0|14||70.0		20|40|68|22|42||100.0		NA	NA	NA	NA	NA	NA	NA	NA	NA	NA	TGTGCCAGCAGCTTTAGCCGCAACCAAGAGACCCAGTACTTC	35	NA	NA	NA	NA	NA	NA	NA	CASSFSRNQETQYF	NA	:::::::::0:-3:14:::::22:0:42:::
BM03	347	1	0.015873	TGTGCCAGCAGCTTAAAACAGTCCTACGAGCAGTACTTC	EEEEEEEEEFEEEEFFEFEEFEEEEEFEFEEFEEEEEEE	TRBV7-2*00(284),TRBV7-8*00(252)		TRBJ2-7*00(230)	TRBC2*00(95)	430|445|467|0|15||75.0;430|445|467|0|15||75.0		21|39|67|21|39||90.0		NA	NA	NA	NA	NA	NA	NA	NA	NA	NA	TGTGCCAGCAGCTTAAAACAGTCCTACGAGCAGTACTTC	36	NA	NA	NA	NA	NA	NA	NA	CASSLKQSYEQYF	NA	:::::::::0:-2:15:::::21:-1:39:::
BM04	23	6	0.146341	TGTGCCAGCAGTGAATATGAGAGTGGTAACACTGAAGCTTTCTTT	EEEEEEEEEEEEFEEEEEEEEEFEEEEEEFEEEEEEEEEEEEEEF	TRBV2*00(218.3)		TRBJ1-1*00(230)		430|445|467|0|15||75.0		22|40|68|27|45||90.0		NA	NA	NA	NA	NA	NA	NA	NA	NA	NA	TGTGCCAGCAGTGAATATGAGAGTGGTAACACTGAAGCTTTCTTT	36	NA	NA	NA	NA	NA	NA	NA	CASSEYESGNTEAFF	NA	:::::::::0:-2:15:::::27:-2:45:::
BM04	48	4	0.097561	TGTGCCAGCAGCATCGTTAAGGGATATGGCTACACCTTC	EEEEEEEEEEEEEEEEEDDEEEEEDDEEDEDDEEEDED?	TRBV6-1*00(179)		TRBJ1-2*00(215)		427|438|464|0|11||55.0		25|40|68|24|39||75.0		NA	NA	NA	NA	NA	NA	NA	NA	NA	NA	TGTGCCAGCAGCATCGTTAAGGGATATGGCTACACCTTC	30	NA	NA	NA	NA	NA	NA	NA	CASSIVKGYGYTF	NA	:::::::::0:-6:11:::::24:-5:39:::
BM04	49	4	0.097561	TGTGCCAGCAACTCGGGATCTGGAAACGAAAAACTGTTTTTT	EEBEEADDEEDEDEEEEEEEEEEEEEEEDEEE>EDECDEBEE	TRBV6-1*00(190.8),TRBV6-5*00(190.8)	TRBD1*00(25),TRBD2*00(25)	TRBJ1-4*00(172)		427|437|464|0|10||50.0;427|437|464|0|10||50.0	11|16|36|13|18||25.0;15|20|48|13|18||25.0	28|43|71|27|42||75.0		NA	NA	NA	NA	NA	NA	NA	NA	NA	NA	TGTGCCAGCAACTCGGGATCTGGAAACGAAAAACTGTTTTTT	29	NA	NA	NA	NA	NA	NA	NA	CASNSGSGNEKLFF	NA	:::::::::0:-7:10:13:1:-8:18:27:-8:42:::
BM04	140	2	0.0487805	TGTGCCAGCAGGGGGGACAGTAGCAATTCACCCCTCCACTTT	EEEDEDAEDBEEDEEDDDEEECBEEDEED<=ADBADEDDEEE	TRBV2*00(90),TRBV13*00(82)	TRBD1*00(35)	TRBJ1-6*00(214)		430|441|467|0|11||55.0;457|468|494|0|11||55.0	12|19|36|13|20||35.0	27|45|73|24|42||90.0		NA	NA	NA	NA	NA	NA	NA	NA	NA	NA	TGTGCCAGCAGGGGGGACAGTAGCAATTCACCCCTCCACTTT	27	NA	NA	NA	NA	NA	NA	NA	CASRGDSSNSPLHF	NA	:::::::::0:-6:11:13:0:-5:20:24:-7:42:::
BM04	142	2	0.0487805	TGTGCCAGCATGATAGGGGGTCAGCCCCAGCATTTT	DED=ADBDCBEEEEBEEEEEBE<CEEDEBDC?DDCB	TRBV6-1*00(187),TRBV6-5*00(187),TRBV6-6*00(187)	TRBD1*00(30)	TRBJ1-5*00(220)		427|437|464|0|10||50.0;427|437|464|0|10||50.0;427|437|464|0|10||50.0	17|23|36|14|20||30.0	26|42|70|20|36||80.0		NA	NA	NA	NA	NA	NA	NA	NA	NA	NA	TGTGCCAGCATGATAGGGGGTCAGCCCCAGCATTTT	27	NA	NA	NA	NA	NA	NA	NA	CASMIGGQPQHF	NA	:::::::::0:-7:10:14:-5:-1:20:20:-6:36:::
BM04	143	2	0.0487805	TGTGCCAGCAGTTATATCGGGACAGGAGTGACTGGGGCCAACGTCCTGACTTTC	EEDEEEEEEEE7EDEEEEEEEBEEEEEEEEEEEEEEEEEE>DDCEEE>EEECED	TRBV6-5*00(285)	TRBD1*00(45)	TRBJ2-6*00(255)	TRBC2*00(90)	427|441|464|0|14||70.0	11|20|36|17|26||45.0	22|45|73|31|54||115.0		NA	NA	NA	NA	NA	NA	NA	NA	NA	NA	TGTGCCAGCAGTTATATCGGGACAGGAGTGACTGGGGCCAACGTCCTGACTTTC	22	NA	NA	NA	NA	NA	NA	NA	CASSYIGTGVTGANVLTF	NA	:::::::::0:-3:14:17:1:-4:26:31:-2:54:::
BM04	234	1	0.0243902	TGCGCCAGTGGACCCTCCTACGAGCAGTACTTC	EEEEFFEEEEEEEFFEEEEEEEEEDFFEEEEEE	TRBV10-2*00(248)		TRBJ2-7*00(155)		427|435|464|0|8||40.0		20|39|67|14|33||95.0		NA	NA	NA	NA	NA	NA	NA	NA	NA	NA	TGCGCCAGTGGACCCTCCTACGAGCAGTACTTC	35	NA	NA	NA	NA	NA	NA	NA	CASGPSYEQYF	NA	:::::::::0:-9:8:::::14:0:33:::
BM04	235	1	0.0243902	TGTGCCATCAGTGAGTCTACCGGGCAGGAGTTCTTC	EEFDEEBEEEEEEEEECEECEDEDCEEEEEEEEEE>	TRBV10-3*00(220)	TRBD1*00(25),TRBD2*00(25)	TRBJ2-1*00(180)		427|444|464|0|17||85.0	10|15|36|19|24||25.0;14|19|48|19|24||25.0	34|42|70|28|36||40.0		NA	NA	NA	NA	NA	NA	NA	NA	NA	NA	TGTGCCATCAGTGAGTCTACCGGGCAGGAGTTCTTC	29	NA	NA	NA	NA	NA	NA	NA	CAISESTGQEFF	NA	:::::::::0:0:17:19:2:-9:24:28:-14:36:::
BM04	236	1	0.0243902	TGTGCCAGCAGGAGAACCTTGGGGGCCTCGTACCAAGAGACCCAGTACTTC	BED@BDDDDEEDE<DEE;EEB:AADE>=?DBC>EE=DD@CCD?CBDBEAE9	TRBV12-3*00(160),TRBV12-4*00(160)	TRBD1*00(30)	TRBJ2-5*00(250)		430|441|467|0|11||55.0;430|441|467|0|11||55.0	18|24|36|20|26||30.0	18|40|68|29|51||110.0		NA	NA	NA	NA	NA	NA	NA	NA	NA	NA	TGTGCCAGCAGGAGAACCTTGGGGGCCTCGTACCAAGAGACCCAGTACTTC	24	NA	NA	NA	NA	NA	NA	NA	CASRRTLGASYQETQYF	NA	:::::::::0:-6:11:20:-6:0:26:29:2:51:::
BM04	237	1	0.0243902	TGTGCCAGCAGTTTAGTACAGGGCCGCGAGCAGTACTTC	EEEE>EEEEEDEEEECADEEE@EDDEEEEDEEED?EEE<	TRBV12-3*00(273),TRBV12-4*00(273)	TRBD1*00(30),TRBD2*00(30)	TRBJ2-7*00(205)		430|446|467|0|16||80.0;430|446|467|0|16||80.0	15|21|36|17|23||30.0;28|34|48|19|25||30.0	26|39|67|26|39||65.0		NA	NA	NA	NA	NA	NA	NA	NA	NA	NA	TGTGCCAGCAGTTTAGTACAGGGCCGCGAGCAGTACTTC	27	NA	NA	NA	NA	NA	NA	NA	CASSLVQGREQYF	NA	:::::::::0:-1:16:17:-3:-3:23:26:-6:39:::
BM04	238	1	0.0243902	TGTGCCAGTACCCTATCGCGAAATCAGCCCCAGCATTTT	EDEDDEEEEEEEEEEEEEEEEEC@EBEEED?EEEDEDEE	TRBV19*00(190)		TRBJ1-5*00(230)		427|437|464|0|10||50.0		24|42|70|21|39||90.0		NA	NA	NA	NA	NA	NA	NA	NA	NA	NA	TGTGCCAGTACCCTATCGCGAAATCAGCCCCAGCATTTT	30	NA	NA	NA	NA	NA	NA	NA	CASTLSRNQPQHF	NA	:::::::::0:-7:10:::::21:-4:39:::
BM04	240	1	0.0243902	TGTGCCAGCAGCCAGGGGGCGAGGGGAGAAAAACTGTTTTTT	DDD9@D?CE?CDDBDEEED9ECDCEDDEDCDBD=EDEBDEDD	TRBV2*00(215)	TRBD1*00(45)	TRBJ1-4*00(205)		430|441|467|0|11||55.0	16|25|36|12|21||45.0	28|43|71|27|42||75.0		NA	NA	NA	NA	NA	NA	NA	NA	NA	NA	TGTGCCAGCAGCCAGGGGGCGAGGGGAGAAAAACTGTTTTTT	24	NA	NA	NA	NA	NA	NA	NA	CASSQGARGEKLFF	NA	:::::::::0:-6:11:12:-4:1:21:27:-8:42:::
BM04	241	1	0.0243902	TGTGCCAGTAGATTGGACAGTAACAATGAGCAGTTCTTC	EEEEEEEEDAEEEDEEDEEEEEDEEDEEEECEEECEEDE	TRBV2*00(180)	TRBD1*00(30)	TRBJ2-1*00(145)		430|438|467|0|8||40.0	13|19|36|14|20||30.0	25|42|70|22|39||85.0		NA	NA	NA	NA	NA	NA	NA	NA	NA	NA	TGTGCCAGTAGATTGGACAGTAACAATGAGCAGTTCTTC	32	NA	NA	NA	NA	NA	NA	NA	CASRLDSNNEQFF	NA	:::::::::0:-9:8:14:-1:-5:20:22:-5:39:::
BM04	242	1	0.0243902	TGTGCCAGCAGTGCTCCACTAGGGCTAGAACAGTACTTC	@D@E8=<ADDDCDD@AECDB:EEDD=CDC;CC@B@@@ED	TRBV2*00(205)	TRBD2*00(25)	TRBJ2-7*00(185)		430|443|467|0|13||65.0	7|12|48|23|28||25.0	30|39|67|30|39||45.0		NA	NA	NA	NA	NA	NA	NA	NA	NA	NA	TGTGCCAGCAGTGCTCCACTAGGGCTAGAACAGTACTTC	23	NA	NA	NA	NA	NA	NA	NA	CASSAPLGLEQYF	NA	:::::::::0:-4:13:23:9:-20:28:30:-10:39:::
BM04	243	1	0.0243902	TGCAGTGCTAGAGTTCCGGGGAAGAGGACTTTCTTT	BDDEEEEA6EEEE;@6DEEECEE=CDEEEDEEEEEA	TRBV20-1*00(220)	TRBD1*00(25),TRBD2*00(25)	TRBJ1-1*00(180)		421|434|455|0|13||65.0	10|15|36|15|20||25.0;14|19|48|15|20||25.0	32|40|68|28|36||40.0		NA	NA	NA	NA	NA	NA	NA	NA	NA	NA	TGCAGTGCTAGAGTTCCGGGGAAGAGGACTTTCTTT	21	NA	NA	NA	NA	NA	NA	NA	CSARVPGKRTFF	NA	:::::::::0:-1:13:15:2:-9:20:28:-12:36:::
BM04	244	1	0.0243902	TGCAGTGCCCAAGAATTTAAGCGGGAGTATTCACCCCTCCACTTT	=EEACDDB9DDEEE@DCDC6DCEECDD@DCAD<B?CDC>E@CD=E	TRBV20-1*00(150)	TRBD2*00(40)	TRBJ1-6*00(209)		421|429|455|0|8||40.0	22|30|48|19|27||40.0	28|45|73|28|45||85.0		NA	NA	NA	NA	NA	NA	NA	NA	NA	NA	TGCAGTGCCCAAGAATTTAAGCGGGAGTATTCACCCCTCCACTTT	21	NA	NA	NA	NA	NA	NA	NA	CSAQEFKREYSPLHF	NA	:::::::::0:-6:8:19:-6:-2:27:28:-8:45:::
BM04	245	1	0.0243902	TGTGCCAGCAGCCCAAGGACAGGGATGAGTGGCTACACCTTC	EEFEDFEDEEEEEEEEEEEEEEEEEEEEEEEEEFDEEEEEEE	TRBV27*00(180)	TRBD1*00(40)	TRBJ1-2*00(205)		427|438|464|0|11||55.0	13|21|36|16|24||40.0	27|40|68|29|42||65.0		NA	NA	NA	NA	NA	NA	NA	NA	NA	NA	TGTGCCAGCAGCCCAAGGACAGGGATGAGTGGCTACACCTTC	35	NA	NA	NA	NA	NA	NA	NA	CASSPRTGMSGYTF	NA	:::::::::0:-6:11:16:-1:-3:24:29:-7:42:::
BM04	246	1	0.0243902	TGTGCCAGCAGGCCGAGGGGTAATCAGCCCCAGCATTTT	EECEEEEEEDEEEEEBEEDEEDEEEDEEEEEECEEEEEE	TRBV27*00(115)	TRBD1*00(25),TRBD2*00(25)	TRBJ1-5*00(230)	TRBC1*00(164)	427|438|464|0|11||55.0	17|22|36|15|20||25.0;27|32|48|14|19||25.0	24|42|70|21|39||90.0		NA	NA	NA	NA	NA	NA	NA	NA	NA	NA	TGTGCCAGCAGGCCGAGGGGTAATCAGCCCCAGCATTTT	33	NA	NA	NA	NA	NA	NA	NA	CASRPRGNQPQHF	NA	:::::::::0:-6:11:15:-5:-2:20:21:-4:39:::
BM04	247	1	0.0243902	TGTGCCAGCAGTTTTAGGGGTAGGGATGAGCAGTTCTTC	EFEEEEEEEEFEEEEEEEEEDEFEEEEEEFEEFE?EDEE	TRBV27*00(299)	TRBD1*00(25)	TRBJ2-1*00(210)		427|441|464|0|14||70.0	17|22|36|15|20||25.0	28|42|70|25|39||70.0		NA	NA	NA	NA	NA	NA	NA	NA	NA	NA	TGTGCCAGCAGTTTTAGGGGTAGGGATGAGCAGTTCTTC	30	NA	NA	NA	NA	NA	NA	NA	CASSFRGRDEQFF	NA	:::::::::0:-3:14:15:-5:-2:20:25:-8:39:::
BM04	248	1	0.0243902	TGTGCCAGCAGTTTGGGGGGGCAGGGTGGCTACACCTTC	EEEEEEEEEEEEEEEEEEEEEEEEEEEEEEEDEEEEEEE	TRBV28*00(274)	TRBD1*00(30)	TRBJ1-2*00(205)		427|441|464|0|14||70.0	18|24|36|16|22||30.0	27|40|68|26|39||65.0		NA	NA	NA	NA	NA	NA	NA	NA	NA	NA	TGTGCCAGCAGTTTGGGGGGGCAGGGTGGCTACACCTTC	35	NA	NA	NA	NA	NA	NA	NA	CASSLGGQGGYTF	NA	:::::::::0:-3:14:16:-6:0:22:26:-7:39:::
BM04	249	1	0.0243902	TGCAGCGTTGAAGCTAAAATCGGCGTCCTGACTTTC	E;==?DCB>DDCBACDC<8@96>BC===ED?D@EC=	TRBV29-1*00(220)		TRBJ2-6*00(205)		421|434|455|0|13||65.0		32|45|73|23|36||65.0		NA	NA	NA	NA	NA	NA	NA	NA	NA	NA	TGCAGCGTTGAAGCTAAAATCGGCGTCCTGACTTTC	21	NA	NA	NA	NA	NA	NA	NA	CSVEAKIGVLTF	NA	:::::::::0:-1:13:::::23:-12:36:::
BM04	250	1	0.0243902	TGCGCCAGCAGCTCAGCGGGAGGAACCTACGAGCAGTACTTC	EEEECDEEEEDEEEEEEEEFEEEEDEFEEEEEEEEDEEEDEE	TRBV5-1*00(398)	TRBD2*00(45)	TRBJ2-7*00(225)		427|440|463|0|13||65.0	22|31|48|14|23||45.0	22|39|67|25|42||85.0		NA	NA	NA	NA	NA	NA	NA	NA	NA	NA	TGCGCCAGCAGCTCAGCGGGAGGAACCTACGAGCAGTACTTC	34	NA	NA	NA	NA	NA	NA	NA	CASSSAGGTYEQYF	NA	:::::::::0:-3:13:14:-6:-1:23:25:-2:42:::
BM04	251	1	0.0243902	TGTGCCAGCAGCTTGGTTGGGACAGGAAGACCCTACGAGCAGTACTTC	FEEEEEEEEEEEEEFEEEEEEEEFFEEFEEEEEEEEEFFEEFEEEEEE	TRBV5-6*00(214),TRBV5-5*00(198),TRBV5-7*00(198)	TRBD1*00(40)	TRBJ2-7*00(225)		427|443|463|0|16||80.0;427|443|463|0|16||80.0;427|443|463|0|16||80.0	12|20|36|18|26||40.0	22|39|67|31|48||85.0		NA	NA	NA	NA	NA	NA	NA	NA	NA	NA	TGTGCCAGCAGCTTGGTTGGGACAGGAAGACCCTACGAGCAGTACTTC	36	NA	NA	NA	NA	NA	NA	NA	CASSLVGTGRPYEQYF	NA	:::::::::0:0:16:18:0:-4:26:31:-2:48:::
BM04	252	1	0.0243902	TGTGCCAGCAGCCAACCGGGACAAAGAGAAGGCGAGCTGTTTTTT	=E@ABD8@ECCAE==EBEE;BBDEE=E?BACC@EBEBCDEAEDDC	TRBV6-2*00(165),TRBV6-3*00(165),TRBV6-1*00(149),TRBV6-5*00(149),TRBV6-6*00(149)	TRBD1*00(40),TRBD2*00(35)	TRBJ2-2*00(200)		427|438|464|0|11||55.0;427|438|464|0|11||55.0;427|438|464|0|11||55.0;427|438|464|0|11||55.0;427|438|464|0|11||55.0	10|18|36|15|23||40.0;14|21|48|15|22||35.0	31|43|71|33|45||60.0		NA	NA	NA	NA	NA	NA	NA	NA	NA	NA	TGTGCCAGCAGCCAACCGGGACAAAGAGAAGGCGAGCTGTTTTTT	23	NA	NA	NA	NA	NA	NA	NA	CASSQPGQREGELFF	NA	:::::::::0:-6:11:15:2:-6:23:33:-11:45:::
BM04	253	1	0.0243902	TGTGCCAGCAGTCCAAGCGCCTACTACACAGATACGCAGTATTTT	EEEBEEEEEDDDCEE>EAE@EEDDECCDEEE=EDDCEEEEDCEDE	TRBV6-2*00(155),TRBV6-3*00(155)	TRBD1*00(25)	TRBJ2-3*00(235)		427|439|464|0|12||60.0;427|439|464|0|12||60.0	22|27|36|16|21||25.0	22|41|69|26|45||95.0		NA	NA	NA	NA	NA	NA	NA	NA	NA	NA	TGTGCCAGCAGTCCAAGCGCCTACTACACAGATACGCAGTATTTT	28	NA	NA	NA	NA	NA	NA	NA	CASSPSAYYTDTQYF	NA	:::::::::0:-5:12:16:-10:3:21:26:-2:45:::
BM04	254	1	0.0243902	TGTGCCAGCAGTTTCCTAGCGGGATCCCAAGAGACCCAGTACTTC	EEEEEEEEEEFEEDFEEEFEEEEEEEEFEEFEEEEEEEEEEEEDE	TRBV6-5*00(194)	TRBD2*00(45)	TRBJ2-5*00(219)	TRBC2*00(61)	427|440|464|0|13||65.0	20|29|48|15|24||45.0	21|40|68|26|45||95.0		NA	NA	NA	NA	NA	NA	NA	NA	NA	NA	TGTGCCAGCAGTTTCCTAGCGGGATCCCAAGAGACCCAGTACTTC	35	NA	NA	NA	NA	NA	NA	NA	CASSFLAGSQETQYF	NA	:::::::::0:-4:13:15:-4:-3:24:26:-1:45:::
BM04	255	1	0.0243902	TGTGCCAGCAGCGGACAGGGGAACACTGAAGCTTTCTTT	EDFFEEFEEEFEEEFEEFFEFFEEFEEEDFFDFFEEEED	TRBV7-9*00(288)	TRBD1*00(40)	TRBJ1-1*00(64)		430|442|467|0|12||60.0	13|21|36|12|20||40.0	21|40|68|20|39||95.0		NA	NA	NA	NA	NA	NA	NA	NA	NA	NA	TGTGCCAGCAGCGGACAGGGGAACACTGAAGCTTTCTTT	35	NA	NA	NA	NA	NA	NA	NA	CASSGQGNTEAFF	NA	:::::::::0:-5:12:12:-1:-3:20:20:-1:39:::
BM05	61	13	0.216667	TGTGCCAGCAGTTTATCGGGTGGAAGCACTGAAGCTTTCTTT	???EEEEEEEEEEEEEFEEFEFEEEEEEEEFEEEEEEEFEEE	TRBV12-3*00(468.8),TRBV12-4*00(468.8)		TRBJ1-1*00(220)	TRBC1*00(96)	430|445|467|0|15||75.0;430|445|467|0|15||75.0		24|40|68|26|42||80.0		NA	NA	NA	NA	NA	NA	NA	NA	NA	NA	TGTGCCAGCAGTTTATCGGGTGGAAGCACTGAAGCTTTCTTT	30	NA	NA	NA	NA	NA	NA	NA	CASSLSGGSTEAFF	NA	:::::::::0:-2:15:::::26:-4:42:::
BM05	73	10	0.166667	TGTGCCAGCAGTCCTCTAGGGGGGGTAGCTCGGGAAAAACTGTTTTTT	EEEEEEEEEEEEEFEEEEEEEEEEEEEEEEEEEEEDEEEEEEEDEEEE	TRBV27*00(125)	TRBD1*00(30)	TRBJ1-4*00(182.8)	TRBC1*00(412),TRBC2*00(380)	427|439|464|0|12||60.0	17|23|36|17|23||30.0	28|43|71|33|48||75.0	;	NA	NA	NA	NA	NA	NA	NA	NA	NA	NA	TGTGCCAGCAGTCCTCTAGGGGGGGTAGCTCGGGAAAAACTGTTTTTT	35	NA	NA	NA	NA	NA	NA	NA	CASSPLGGVAREKLFF	NA	:::::::::0:-5:12:17:-5:-1:23:33:-8:48:::
BM05	94	8	0.133333	TGTGCCAGCAGTTTCGGTCAATCTGAGCAGTTCTTC	EFFFEFFEEEEEEFFEEEFFEEFFFFFEFFEEFFFF	TRBV28*00(260)		TRBJ2-1*00(205)	TRBC2*00(85)	427|441|464|0|14||70.0		29|42|70|23|36||65.0		NA	NA	NA	NA	NA	NA	NA	NA	NA	NA	TGTGCCAGCAGTTTCGGTCAATCTGAGCAGTTCTTC	36	NA	NA	NA	NA	NA	NA	NA	CASSFGQSEQFF	NA	:::::::::0:-3:14:::::23:-9:36:::
BM05	103	7	0.116667	TGTGCCAGCACTCCCAGAACGAACACCGGGGAGCTGTTTTTT	EEEEEFEEEEFEEEFFEFEEFEEEFFFEFFEEFEEEFEEFEF	TRBV6-1*00(227),TRBV6-5*00(227),TRBV6-8*00(227)	TRBD2*00(25)	TRBJ2-2*00(255)		427|437|464|0|10||50.0;427|437|464|0|10||50.0;424|434|461|0|10||50.0	2|7|48|10|15||25.0	20|43|71|19|42||115.0		NA	NA	NA	NA	NA	NA	NA	NA	NA	NA	TGTGCCAGCACTCCCAGAACGAACACCGGGGAGCTGTTTTTT	36	NA	NA	NA	NA	NA	NA	NA	CASTPRTNTGELFF	NA	:::::::::0:-7:10:10:14:-25:15:19:0:42:::
BM05	141	3	0.05	TGTGCCAGCAGTCCCGGGACAGGGAACGAAAAACTGTTTTTT	EECEEECDEDEDEEEEEDEDEEECEDEECDE<EEEAEBDDDE	TRBV12-3*00(222.3),TRBV12-4*00(222.3)	TRBD1*00(60)	TRBJ1-4*00(183.3)		430|442|467|0|12||60.0;430|442|467|0|12||60.0	9|21|36|12|24||60.0	28|43|71|27|42||75.0		NA	NA	NA	NA	NA	NA	NA	NA	NA	NA	TGTGCCAGCAGTCCCGGGACAGGGAACGAAAAACTGTTTTTT	27	NA	NA	NA	NA	NA	NA	NA	CASSPGTGNEKLFF	NA	:::::::::0:-5:12:12:3:-3:24:27:-8:42:::
BM05	143	3	0.05	TGTGCCAGCAGCTTGGTCCAGGGGACAACTAATGAAAAACTGTTTTTT	EFEEEEFFEEFEEEEFEEEEEEEEEFEEEEEEEEFFEEEEEEEEFEEE	TRBV5-6*00(290),TRBV5-5*00(274),TRBV5-7*00(274)	TRBD1*00(30)	TRBJ1-4*00(109)		427|443|463|0|16||80.0;427|443|463|0|16||80.0;427|443|463|0|16||80.0	16|22|36|18|24||30.0	20|43|71|25|48||115.0		NA	NA	NA	NA	NA	NA	NA	NA	NA	NA	TGTGCCAGCAGCTTGGTCCAGGGGACAACTAATGAAAAACTGTTTTTT	36	NA	NA	NA	NA	NA	NA	NA	CASSLVQGTTNEKLFF	NA	:::::::::0:0:16:18:-4:-2:24:25:0:48:::
BM05	149	2	0.0333333	TGCAGCGTTGAAGTGGCAGTTGAAGCTTTCTTT	ECCCD;B;BCECB8CBBEEE6@DCCCDEACCAD	TRBV29-1*00(211)		TRBJ1-1*00(205)		421|434|455|0|13||65.0		27|40|68|20|33||65.0		NA	NA	NA	NA	NA	NA	NA	NA	NA	NA	TGCAGCGTTGAAGTGGCAGTTGAAGCTTTCTTT	21	NA	NA	NA	NA	NA	NA	NA	CSVEVAVEAFF	NA	:::::::::0:-1:13:::::20:-7:33:::
BM05	150	2	0.0333333	TGTGCCAGCGGGGTGGGTGGAGATGGCTACACCTTC	DEEEDACD7EEEEDEEDEEEEC;DEBCD<E;DDD:D	TRBV6-1*00(200),TRBV6-5*00(200),TRBV6-6*00(200),TRBV6-2*00(184),TRBV6-3*00(184)		TRBJ1-2*00(210)		427|436|464|0|9||45.0;427|436|464|0|9||45.0;427|436|464|0|9||45.0;427|436|464|0|9||45.0;427|436|464|0|9||45.0		26|40|68|22|36||70.0		NA	NA	NA	NA	NA	NA	NA	NA	NA	NA	TGTGCCAGCGGGGTGGGTGGAGATGGCTACACCTTC	22	NA	NA	NA	NA	NA	NA	NA	CASGVGGDGYTF	NA	:::::::::0:-8:9:::::22:-6:36:::
BM05	156	1	0.0166667	TGTGCCAGCAGTTTGGAAAGCTATGGCTACACCTTC	?C8?BDC9A>@>:BB:DB9B:@@<>CB:?E;AE<6A	TRBV12-3*00(209),TRBV12-4*00(209)		TRBJ1-2*00(220)		430|444|467|0|14||70.0;430|444|467|0|14||70.0		24|40|68|20|36||80.0		NA	NA	NA	NA	NA	NA	NA	NA	NA	NA	TGTGCCAGCAGTTTGGAAAGCTATGGCTACACCTTC	21	NA	NA	NA	NA	NA	NA	NA	CASSLESYGYTF	NA	:::::::::0:-3:14:::::20:-4:36:::
BM05	157	1	0.0166667	TGTGCCAGCAGTTTGGCCAGAGGAAACACCATATATTTT	CDEEBECEBDEBDCDEDDCEEEEEEDD@DADEDD@EEDE	TRBV12-3*00(210),TRBV12-4*00(210)		TRBJ1-3*00(230)		430|444|467|0|14||70.0;430|444|467|0|14||70.0		24|42|70|21|39||90.0		NA	NA	NA	NA	NA	NA	NA	NA	NA	NA	TGTGCCAGCAGTTTGGCCAGAGGAAACACCATATATTTT	31	NA	NA	NA	NA	NA	NA	NA	CASSLARGNTIYF	NA	:::::::::0:-3:14:::::21:-4:39:::
BM05	159	1	0.0166667	TGTGCCAGTACCCTGGGACAGATTAGCAATCAGCCCCAGCATTTT	EDBEADEEEDEEEDDCD=EEEEDEDDEEBDDECDDBCEBBCECEE	TRBV19*00(314)	TRBD1*00(35)	TRBJ1-5*00(250)		427|437|464|0|10||50.0	12|19|36|14|21||35.0	20|42|70|23|45||110.0		NA	NA	NA	NA	NA	NA	NA	NA	NA	NA	TGTGCCAGTACCCTGGGACAGATTAGCAATCAGCCCCAGCATTTT	28	NA	NA	NA	NA	NA	NA	NA	CASTLGQISNQPQHF	NA	:::::::::0:-7:10:14:0:-5:21:23:0:45:::
BM05	160	1	0.0166667	TGTGCCAGTGGACAGTCCGAAGAGACCCAGTACTTC	EDDDDECEEEEEECEEDEEDEAEEDEECEDECDEED	TRBV19*00(209)	TRBD1*00(30)	TRBJ2-5*00(225)		427|436|464|0|9||45.0	13|19|36|9|15||30.0	23|40|68|19|36||85.0		NA	NA	NA	NA	NA	NA	NA	NA	NA	NA	TGTGCCAGTGGACAGTCCGAAGAGACCCAGTACTTC	32	NA	NA	NA	NA	NA	NA	NA	CASGQSEETQYF	NA	:::::::::0:-8:9:9:-1:-5:15:19:-3:36:::
BM05	161	1	0.0166667	TGTGCCAGTAGCCCACTCCAGAACCGCTACGAGCAGTACTTC	DDDEEE:ECCEEEE?EEDEEDEEEEEEEDECDEEEEEEEDEE	TRBV19*00(319)		TRBJ2-7*00(90)		427|438|464|0|11||55.0		23|39|67|26|42||80.0		NA	NA	NA	NA	NA	NA	NA	NA	NA	NA	TGTGCCAGTAGCCCACTCCAGAACCGCTACGAGCAGTACTTC	25	NA	NA	NA	NA	NA	NA	NA	CASSPLQNRYEQYF	NA	:::::::::0:-6:11:::::26:-3:42:::
BM05	162	1	0.0166667	TGTGCCAGTAGTCCTACGGCGGGATCCTACGAGCAGTACTTC	EEEEEEEBEECEDECE=EEEEEEECEEEEDDEEEEDEEEDEE	TRBV19*00(185)	TRBD2*00(30)	TRBJ2-7*00(230)		427|439|464|0|12||60.0	23|29|48|18|24||30.0	21|39|67|24|42||90.0		NA	NA	NA	NA	NA	NA	NA	NA	NA	NA	TGTGCCAGTAGTCCTACGGCGGGATCCTACGAGCAGTACTTC	28	NA	NA	NA	NA	NA	NA	NA	CASSPTAGSYEQYF	NA	:::::::::0:-5:12:18:-7:-3:24:24:-1:42:::
BM05	164	1	0.0166667	TGTGCCAGCAGTTTAATGGGACGGACGAACACTGAAGCTTTCTTT	DCEECEDDDEEDCADDCCEA?BED7DBD?DAC>D@@BDBE=DD@C	TRBV27*00(169)	TRBD1*00(25),TRBD2*00(25)	TRBJ1-1*00(219)		427|442|464|0|15||75.0	12|17|36|17|22||25.0;16|21|48|17|22||25.0	21|40|68|26|45||95.0		NA	NA	NA	NA	NA	NA	NA	NA	NA	NA	TGTGCCAGCAGTTTAATGGGACGGACGAACACTGAAGCTTTCTTT	22	NA	NA	NA	NA	NA	NA	NA	CASSLMGRTNTEAFF	NA	:::::::::0:-2:15:17:0:-7:22:26:-1:45:::
BM05	165	1	0.0166667	TGTGCCAGCATTAGAGCAGGGGACGGCTACACCTTC	EDACBE@?D<ED>DBC:BBB@6A?B>ECDE:DD@D;	TRBV28*00(205)	TRBD1*00(30)	TRBJ1-2*00(200)		427|437|464|0|10||50.0	16|22|36|16|22||30.0	28|40|68|24|36||60.0		NA	NA	NA	NA	NA	NA	NA	NA	NA	NA	TGTGCCAGCATTAGAGCAGGGGACGGCTACACCTTC	21	NA	NA	NA	NA	NA	NA	NA	CASIRAGDGYTF	NA	:::::::::0:-7:10:16:-4:-2:22:24:-8:36:::
BM05	166	1	0.0166667	TGTGCCAGCAGTTTCGGGGGGGGCCGACAAGAGACCCAGTACTTC	EEEEEEEEEEEEEEEEEEEEEEEEEEEEEEFDEEEEEEEEEEEEE	TRBV28*00(274)	TRBD1*00(30),TRBD2*00(29)	TRBJ2-5*00(214)		427|441|464|0|14||70.0	18|24|36|18|24||30.0;25|34|48|16|25|SA28G|29.0	22|40|68|27|45||90.0		NA	NA	NA	NA	NA	NA	NA	NA	NA	NA	TGTGCCAGCAGTTTCGGGGGGGGCCGACAAGAGACCCAGTACTTC	35	NA	NA	NA	NA	NA	NA	NA	CASSFGGGRQETQYF	NA	:::::::::0:-3:14:18:-6:0:24:27:-2:45:::
BM05	167	1	0.0166667	TGTGCCAGCGGACGTGGGACCCCTTCCTACGAGCAGTACTTC	EEDDDDEEBEEDEEAEEDEEECEDDDEEDEDEEEEDDD=EEA	TRBV28*00(249)	TRBD1*00(25),TRBD2*00(25)	TRBJ2-7*00(230)		427|436|464|0|9||45.0	2|7|36|19|24||25.0;16|21|48|15|20||25.0	21|39|67|24|42||90.0		NA	NA	NA	NA	NA	NA	NA	NA	NA	NA	TGTGCCAGCGGACGTGGGACCCCTTCCTACGAGCAGTACTTC	28	NA	NA	NA	NA	NA	NA	NA	CASGRGTPSYEQYF	NA	:::::::::0:-8:9:19:10:-17:24:24:-1:42:::
BM05	168	1	0.0166667	TGTGCCAGCAGTGGCCACAGGGGTCAGCCCCAGCATTTT	EEEEDEEEEEEEEEDEFEEEEEEEEEEDEEDEEEEEEEE	TRBV6-1*00(242),TRBV6-9*00(237),TRBV6-6*00(221)	TRBD1*00(35)	TRBJ1-5*00(204)		427|440|464|0|13||65.0;427|439|464|0|12||60.0;427|439|464|0|12||60.0	15|22|36|16|23||35.0	26|42|70|23|39||80.0		NA	NA	NA	NA	NA	NA	NA	NA	NA	NA	TGTGCCAGCAGTGGCCACAGGGGTCAGCCCCAGCATTTT	35	NA	NA	NA	NA	NA	NA	NA	CASSGHRGQPQHF	NA	:::::::::0:-4:13:16:-3:-2:23:23:-6:39:::
BM05	169	1	0.0166667	TGTGCCAGCAGTCAAACAGAAAACTATGGCTACACCTTC	E>ADEEEDEEEBCB@EEE?CEDEEEEEECAADDDC>AEE	TRBV6-2*00(237),TRBV6-3*00(237)		TRBJ1-2*00(170)		427|439|464|0|12||60.0;427|439|464|0|12||60.0		22|40|68|21|39||90.0		NA	NA	NA	NA	NA	NA	NA	NA	NA	NA	TGTGCCAGCAGTCAAACAGAAAACTATGGCTACACCTTC	29	NA	NA	NA	NA	NA	NA	NA	CASSQTENYGYTF	NA	:::::::::0:-5:12:::::21:-2:39:::
BM06	1	12	0.134831	TGTGCCAGCAGTTTAGACGGAAACTATGGCTACACCTTC	EDEEEEEEEDEEEEEDDEEEEEEEEEDDEEDEEEDDEEE	TRBV12-3*00(203.9),TRBV12-4*00(203.9)		TRBJ1-2*00(230)		430|446|467|0|16||80.0;430|446|467|0|16||80.0		22|40|68|21|39||90.0		NA	NA	NA	NA	NA	NA	NA	NA	NA	NA	TGTGCCAGCAGTTTAGACGGAAACTATGGCTACACCTTC	35	NA	NA	NA	NA	NA	NA	NA	CASSLDGNYGYTF	NA	:::::::::0:-1:16:::::21:-2:39:::
BM06	4	10	0.11236	TGTGCCAGCTCACCGAAAACCGGGACAGAGAACACCGGGGAGCTGTTTTTT	EFEEEEFEEEEEEEEFEEEEEFEEFEFEFEEEEEEEFEEEEEEFFEFFFFE	TRBV18*00(604)	TRBD1*00(45)	TRBJ2-2*00(250)		430|444|467|0|14||70.0	10|19|36|19|28||45.0	21|43|71|29|51||110.0		NA	NA	NA	NA	NA	NA	NA	NA	NA	NA	TGTGCCAGCTCACCGAAAACCGGGACAGAGAACACCGGGGAGCTGTTTTTT	36	NA	NA	NA	NA	NA	NA	NA	CASSPKTGTENTGELFF	NA	:::::::::0:-3:14:19:2:-5:28:29:-1:51:::
BM06	8	8	0.0898876	TGTGCCAGCTCACAGACAGGGACTGAAGCTTTCTTT	EFFFEEFEFEEEEFEEEFFEFEFEEFEEFEFEFFFE	TRBV18*00(589.8)	TRBD1*00(35)	TRBJ1-1*00(215)		430|443|467|0|13||65.0	14|21|36|14|21||35.0	25|40|68|21|36||75.0		NA	NA	NA	NA	NA	NA	NA	NA	NA	NA	TGTGCCAGCTCACAGACAGGGACTGAAGCTTTCTTT	36	NA	NA	NA	NA	NA	NA	NA	CASSQTGTEAFF	NA	:::::::::0:-4:13:14:-2:-3:21:21:-5:36:::
BM06	9	8	0.0898876	TGTGCCAGCAGTCCGTCAGCGTCCTTGAATGAAAAACTGTTTTTT	EEEEDEEEEEDEDEECEEEECEEEEEEEEEEEEEEEEEBEEEDCE	TRBV6-1*00(194.7),TRBV6-5*00(194.7),TRBV6-6*00(192)		TRBJ1-4*00(206.7)		427|439|464|0|12||60.0;427|439|464|0|12||60.0;427|439|464|0|12||60.0		25|43|71|27|45||90.0		NA	NA	NA	NA	NA	NA	NA	NA	NA	NA	TGTGCCAGCAGTCCGTCAGCGTCCTTGAATGAAAAACTGTTTTTT	33	NA	NA	NA	NA	NA	NA	NA	CASSPSASLNEKLFF	NA	:::::::::0:-5:12:::::27:-5:45:::
BM06	11	6	0.0674157	TGTGCCAGCAGTCTCGTGGCAGGGCCGGCCTACGAGCAGTACTTC	FEEEFEFEEFFEEEFFEFFEEEFFFEFEFEEEEFEFEFEFEEEFE	TRBV12-3*00(253),TRBV12-4*00(253)	TRBD2*00(30)	TRBJ2-7*00(225)		430|442|467|0|12||60.0;430|442|467|0|12||60.0	28|34|48|20|26||30.0	22|39|67|28|45||85.0		NA	NA	NA	NA	NA	NA	NA	NA	NA	NA	TGTGCCAGCAGTCTCGTGGCAGGGCCGGCCTACGAGCAGTACTTC	36	NA	NA	NA	NA	NA	NA	NA	CASSLVAGPAYEQYF	NA	:::::::::0:-5:12:20:-12:2:26:28:-2:45:::
BM06	12	5	0.0561798	TGTGCCAGCAGTGAGTATGAAGCGGGTGAGCAGTTCTTC	DEDDACDBEEEBEBEDDEDDADAEDEDEDEEDCDDEDED	TRBV6-4*00(199)	TRBD2*00(30)	TRBJ2-1*00(124.3)		427|441|464|0|14||70.0	22|28|48|20|26||30.0	29|42|70|26|39||65.0		NA	NA	NA	NA	NA	NA	NA	NA	NA	NA	TGTGCCAGCAGTGAGTATGAAGCGGGTGAGCAGTTCTTC	32	NA	NA	NA	NA	NA	NA	NA	CASSEYEAGEQFF	NA	:::::::::0:-3:14:20:-6:-4:26:26:-9:39:::
BM06	13	3	0.0337079	TGTGCCAGCAGTTACGGACTAGCGGATTCTAGGGATACGCAGTATTTT	DEEEDE;DDEEECAEECEDEEDECD=DE>DEEEEDEBDDDDEEEDD@D	TRBV6-5*00(142),TRBV6-6*00(142),TRBV6-2*00(134),TRBV6-3*00(134)	TRBD2*00(50)	TRBJ2-3*00(183)		427|442|464|0|15||75.0;427|442|464|0|15||75.0;427|442|464|0|15||75.0;427|442|464|0|15||75.0	17|27|48|15|25||50.0	26|41|69|33|48||75.0		NA	NA	NA	NA	NA	NA	NA	NA	NA	NA	TGTGCCAGCAGTTACGGACTAGCGGATTCTAGGGATACGCAGTATTTT	26	NA	NA	NA	NA	NA	NA	NA	CASSYGLADSRDTQYF	NA	:::::::::0:-2:15:15:-1:-5:25:33:-6:48:::
BM06	14	2	0.0224719	TGCGCCAGCACGGGACATCTAAATGAAAAACTGTTTTTT	ADCBD>DCEAEEDBCCD@DECDD@EDEEDC>D=CEDDBB	TRBV10-2*00(196.5)	TRBD1*00(35),TRBD2*00(30)	TRBJ1-4*00(220)		427|437|464|0|10||50.0	11|18|36|10|17||35.0;15|21|48|10|16||30.0	25|43|71|21|39||90.0		NA	NA	NA	NA	NA	NA	NA	NA	NA	NA	TGCGCCAGCACGGGACATCTAAATGAAAAACTGTTTTTT	28	NA	NA	NA	NA	NA	NA	NA	CASTGHLNEKLFF	NA	:::::::::0:-7:10:10:1:-6:17:21:-5:39:::
BM06	15	2	0.0224719	TGTGCTAGTGGCCCGGGACTAGCGGGAGTCAATGAGCAGTTCTTC	EDEDD@=E=EB@ECEEE:E@EEEEBDDC7EA@?BEDECCD=ED<D	TRBV12-5*00(145)	TRBD2*00(85)	TRBJ2-1*00(220)		430|441|467|0|11||55.0	13|30|48|11|28||85.0	26|42|70|29|45||80.0		NA	NA	NA	NA	NA	NA	NA	NA	NA	NA	TGTGCTAGTGGCCCGGGACTAGCGGGAGTCAATGAGCAGTTCTTC	22	NA	NA	NA	NA	NA	NA	NA	CASGPGLAGVNEQFF	NA	:::::::::0:-6:11:11:3:-2:28:29:-6:45:::
BM06	16	2	0.0224719	TGTGCCAGCAGTTCATCGGCTACGCAGTATTTT	CE6EDD=EEDFEEEEEEDEAEED<DEECE@AEE	TRBV27*00(267)		TRBJ2-3*00(175)		427|445|464|0|18|ST440C|74.0		28|41|69|20|33||65.0		NA	NA	NA	NA	NA	NA	NA	NA	NA	NA	TGTGCCAGCAGTTCATCGGCTACGCAGTATTTT	21	NA	NA	NA	NA	NA	NA	NA	CASSSSATQYF	NA	:::::::::0:1:18:::::20:-8:33:::
BM06	17	2	0.0224719	TGTGCCAGCCTGCGGGTCACTGAAGCTTTCTTT	FEEEEEEEEEEEEFFEEFEEEFEFEEFFFFFEF	TRBV6-4*00(222)	TRBD2*00(25)	TRBJ1-1*00(220)		427|436|464|0|9||45.0	23|28|48|11|16||25.0	24|40|68|17|33||80.0		NA	NA	NA	NA	NA	NA	NA	NA	NA	NA	TGTGCCAGCCTGCGGGTCACTGAAGCTTTCTTT	36	NA	NA	NA	NA	NA	NA	NA	CASLRVTEAFF	NA	:::::::::0:-8:9:11:-7:-4:16:17:-4:33:::
BM06	18	1	0.011236	TGCGCCAGCAGTGGGGACGGAATGAACACTGAAGCTTTCTTT	DECEEBDDDEEEEEECEDEEEEEDEEDEEEEEE9EEED?EEE	TRBV10-2*00(190)	TRBD1*00(25),TRBD2*00(25)	TRBJ1-1*00(165)		427|440|464|0|13||65.0	12|17|36|13|18||25.0;16|21|48|13|18||25.0	19|40|68|21|42||105.0		NA	NA	NA	NA	NA	NA	NA	NA	NA	NA	TGCGCCAGCAGTGGGGACGGAATGAACACTGAAGCTTTCTTT	24	NA	NA	NA	NA	NA	NA	NA	CASSGDGMNTEAFF	NA	:::::::::0:-4:13:13:0:-7:18:21:1:42:::
BM06	19	1	0.011236	TGTGCCAGCAGCCGGGACAGGCGCACAGATACGCAGTATTTT	DEC:EED9E<9EEDCCDDEEE@ED:?EDE=<C@AEE?D>@;B	TRBV11-3*00(170),TRBV11-1*00(154),TRBV11-2*00(154)	TRBD1*00(45)	TRBJ2-3*00(240)		430|442|467|0|12||60.0;430|442|467|0|12||60.0;430|442|467|0|12||60.0	11|20|36|12|21||45.0	21|41|69|22|42||100.0		NA	NA	NA	NA	NA	NA	NA	NA	NA	NA	TGTGCCAGCAGCCGGGACAGGCGCACAGATACGCAGTATTTT	24	NA	NA	NA	NA	NA	NA	NA	CASSRDRRTDTQYF	NA	:::::::::0:-5:12:12:1:-4:21:22:-1:42:::
BM06	20	1	0.011236	TGTGCCAACCTTTACAGGGGTAGCAATCAGCCCCAGCATTTT	E@EEEEEBEDEEE@EEDEDDDDDEEADED:DC8EDCCDEEEE	TRBV12-3*00(160),TRBV12-4*00(160)	TRBD1*00(35)	TRBJ1-5*00(250)		430|437|467|0|7||35.0;430|437|467|0|7||35.0	15|22|36|13|20||35.0	20|42|70|20|42||110.0		NA	NA	NA	NA	NA	NA	NA	NA	NA	NA	TGTGCCAACCTTTACAGGGGTAGCAATCAGCCCCAGCATTTT	23	NA	NA	NA	NA	NA	NA	NA	CANLYRGSNQPQHF	NA	:::::::::0:-10:7:13:-3:-2:20:20:0:42:::
BM06	21	1	0.011236	TGTGCCAGCAGTCTAGGGGGGGAGCAGTTCTTC	CDE8DEEEEE>AD;EEEEDEE<EDDE9EEEE@=	TRBV12-3*00(198),TRBV12-4*00(198)	TRBD1*00(25)	TRBJ2-1*00(200)		430|446|467|0|16|ST442C|64.0;430|446|467|0|16|ST442C|64.0	18|23|36|16|21||25.0	30|42|70|21|33||60.0		NA	NA	NA	NA	NA	NA	NA	NA	NA	NA	TGTGCCAGCAGTCTAGGGGGGGAGCAGTTCTTC	23	NA	NA	NA	NA	NA	NA	NA	CASSLGGEQFF	NA	:::::::::0:-1:16:16:-6:-1:21:21:-10:33:::
BM06	22	1	0.011236	TGTGCCAGCACCAGCGGAGGAGGCTCCTACAATGAGCAGTTCTTC	EEEEEEEEEEEEEEEEEEEEEEEDEEE6DEEEECEEEEEEEEEEE	TRBV12-3*00(140),TRBV12-4*00(140)	TRBD2*00(25)	TRBJ2-1*00(255)		430|440|467|0|10||50.0;430|440|467|0|10||50.0	22|27|48|12|17||25.0	19|42|70|22|45||115.0		NA	NA	NA	NA	NA	NA	NA	NA	NA	NA	TGTGCCAGCACCAGCGGAGGAGGCTCCTACAATGAGCAGTTCTTC	21	NA	NA	NA	NA	NA	NA	NA	CASTSGGGSYNEQFF	NA	:::::::::0:-7:10:12:-6:-5:17:22:1:45:::
BM06	23	1	0.011236	TGTGCCAGCAGTACAGGAGACGCGAACACCGGGGAGCTGTTTTTT	EEEFEDEEEEEEEEEEDEEEEEEEEEFEEEEEEEEEEEEEEEEEE	TRBV12-3*00(232),TRBV12-4*00(232)	TRBD1*00(25)	TRBJ2-2*00(170)		430|442|467|0|12||60.0;430|442|467|0|12||60.0	15|20|36|12|17||25.0	18|43|71|20|45||125.0		NA	NA	NA	NA	NA	NA	NA	NA	NA	NA	TGTGCCAGCAGTACAGGAGACGCGAACACCGGGGAGCTGTTTTTT	35	NA	NA	NA	NA	NA	NA	NA	CASSTGDANTGELFF	NA	:::::::::0:-5:12:12:-3:-4:17:20:2:45:::
BM06	24	1	0.011236	TGTGCCAGCAGTAAAAGAGGGCAGGAAGAGACCCAGTACTTC	DDEEB7?ACDECCDED@BCD=DDEE?ADDE9>BDCEEA?DEA	TRBV12-3*00(210),TRBV12-4*00(210)	TRBD2*00(30)	TRBJ2-5*00(209)		430|442|467|0|12||60.0;430|442|467|0|12||60.0	27|33|48|16|22||30.0	23|40|68|25|42||85.0		NA	NA	NA	NA	NA	NA	NA	NA	NA	NA	TGTGCCAGCAGTAAAAGAGGGCAGGAAGAGACCCAGTACTTC	22	NA	NA	NA	NA	NA	NA	NA	CASSKRGQEETQYF	NA	:::::::::0:-5:12:16:-11:1:22:25:-3:42:::
BM06	25	1	0.011236	TGTGTTAGTGGCTCCCTAAGCGGGGGTGAAGCTTTCTTT	DEDE?ADD@E?DE@;AA>BC8B;ECEEDBDBBBEDBDDE	TRBV12-5*00(147)	TRBD2*00(30)	TRBJ1-1*00(205)		430|441|467|0|11|SC434T|39.0	22|28|48|18|24||30.0	27|40|68|26|39||65.0		NA	NA	NA	NA	NA	NA	NA	NA	NA	NA	TGTGTTAGTGGCTCCCTAAGCGGGGGTGAAGCTTTCTTT	23	NA	NA	NA	NA	NA	NA	NA	CVSGSLSGGEAFF	NA	:::::::::0:-6:11:18:-6:-4:24:26:-7:39:::
BM06	26	1	0.011236	TGTGCCAGCAGCCAAGATCCGAACACTGAAGCTTTCTTT	CDECCDEBDD=:AEED=E?;DCE?>DECCE98EE>BDEE	TRBV14*00(235)		TRBJ1-1*00(235)		430|449|467|0|19||95.0		21|40|68|20|39||95.0		NA	NA	NA	NA	NA	NA	NA	NA	NA	NA	TGTGCCAGCAGCCAAGATCCGAACACTGAAGCTTTCTTT	23	NA	NA	NA	NA	NA	NA	NA	CASSQDPNTEAFF	NA	:::::::::0:2:19:::::20:-1:39:::
BM06	28	1	0.011236	TGTGCCAGTAGAACAGGGGGGACTGAAGCTTTCTTT	EEDECAEEEEDEEDEEE7BDECEFEEEBECEEEDEE	TRBV19*00(303)	TRBD1*00(40)	TRBJ1-1*00(215)		427|438|464|0|11||55.0	15|23|36|12|20||40.0	25|40|68|21|36||75.0		NA	NA	NA	NA	NA	NA	NA	NA	NA	NA	TGTGCCAGTAGAACAGGGGGGACTGAAGCTTTCTTT	22	NA	NA	NA	NA	NA	NA	NA	CASRTGGTEAFF	NA	:::::::::0:-6:11:12:-3:-1:20:21:-5:36:::
BM06	29	1	0.011236	TGTGCCAGTAGGAACCCTTGGGGGGCTAGCAATCAGCCCCAGCATTTT	EDE@CDEDEEEAE>EDDDEEECEDD@?EEE@DEEBEE@DEDDE>EEEE	TRBV19*00(130)	TRBD1*00(30)	TRBJ1-5*00(250)		427|438|464|0|11||55.0	18|24|36|20|26||30.0	20|42|70|26|48||110.0		NA	NA	NA	NA	NA	NA	NA	NA	NA	NA	TGTGCCAGTAGGAACCCTTGGGGGGCTAGCAATCAGCCCCAGCATTTT	29	NA	NA	NA	NA	NA	NA	NA	CASRNPWGASNQPQHF	NA	:::::::::0:-6:11:20:-6:0:26:26:0:48:::
BM06	30	1	0.011236	TGTGCCAGCAGGGCTAAGGTGGGACTGTTTTTT	EE8EFEEEEEBEEEEEE8DBEEE<CEECEEEEE	TRBV2*00(314)		TRBJ1-4*00(85)		430|441|467|0|11||55.0		33|43|71|23|33||50.0		NA	NA	NA	NA	NA	NA	NA	NA	NA	NA	TGTGCCAGCAGGGCTAAGGTGGGACTGTTTTTT	23	NA	NA	NA	NA	NA	NA	NA	CASRAKVGLFF	NA	:::::::::0:-6:11:::::23:-13:33:::
BM06	31	1	0.011236	TGTGCCAGCAGTAAGGGGACAGGGAATTCACCCCTCCACTTT	9@=6;BC?DDEDDD<8>7<EB8EA8D=A@@<99A=>D?E99D	TRBV2*00(185)	TRBD1*00(45)	TRBJ1-6*00(214)		430|442|467|0|12||60.0	12|21|36|15|24||45.0	27|45|73|24|42||90.0		NA	NA	NA	NA	NA	NA	NA	NA	NA	NA	TGTGCCAGCAGTAAGGGGACAGGGAATTCACCCCTCCACTTT	21	NA	NA	NA	NA	NA	NA	NA	CASSKGTGNSPLHF	NA	:::::::::0:-5:12:15:0:-3:24:24:-7:42:::
BM06	32	1	0.011236	TGCAGTGCTAGAGATTCCGCGTCGTACAATGAGCAGTTCTTC	EFEEEEEEEE?EEECEEECEEDEEEFEFEEEEDEEEEDDEEE	TRBV20-1*00(397)		TRBJ2-1*00(230)		421|436|455|0|15||75.0		24|42|70|24|42||90.0		NA	NA	NA	NA	NA	NA	NA	NA	NA	NA	TGCAGTGCTAGAGATTCCGCGTCGTACAATGAGCAGTTCTTC	30	NA	NA	NA	NA	NA	NA	NA	CSARDSASYNEQFF	NA	:::::::::0:1:15:::::24:-4:42:::
BM06	34	1	0.011236	TGTGCCAGCAGTTTATCGATGTCAGGGGAGAAGGGCTACACCTTC	EEEE?D<EDAEEEE9DEE;DEECEEDBEBE@DBDECDEE=EBEEE	TRBV27*00(293)	TRBD1*00(30)	TRBJ1-2*00(94)		427|447|464|0|20||100.0	16|22|36|22|28||30.0	28|40|68|33|45||60.0		NA	NA	NA	NA	NA	NA	NA	NA	NA	NA	TGTGCCAGCAGTTTATCGATGTCAGGGGAGAAGGGCTACACCTTC	24	NA	NA	NA	NA	NA	NA	NA	CASSLSMSGEKGYTF	NA	:::::::::0:3:20:22:-4:-2:28:33:-8:45:::
BM06	35	1	0.011236	TGTGCCAGCAGTTCCTTACTAAACACTGAAGCTTTCTTT	EE9EEEDEEEF9EEEEEECE@EED9ECEE?9B?BEEEED	TRBV28*00(269)		TRBJ1-1*00(143)		427|440|464|0|13||65.0		22|40|68|21|39||90.0		NA	NA	NA	NA	NA	NA	NA	NA	NA	NA	TGTGCCAGCAGTTCCTTACTAAACACTGAAGCTTTCTTT	24	NA	NA	NA	NA	NA	NA	NA	CASSSLLNTEAFF	NA	:::::::::0:-4:13:::::21:-2:39:::
BM06	36	1	0.011236	TGTGCCAGCAGTCCCGGGACAGGGTCCTGGGCCAACGTCCTGACTTTC	DDE?EEEDF@DEDEEEEEEE8EEEE?EFEEEDEEEEDEEFEDEEEEEF	TRBV28*00(264)	TRBD1*00(60)	TRBJ2-6*00(229)		427|439|464|0|12||60.0	9|21|36|12|24||60.0	25|45|73|28|48||100.0		NA	NA	NA	NA	NA	NA	NA	NA	NA	NA	TGTGCCAGCAGTCCCGGGACAGGGTCCTGGGCCAACGTCCTGACTTTC	23	NA	NA	NA	NA	NA	NA	NA	CASSPGTGSWANVLTF	NA	:::::::::0:-5:12:12:3:-3:24:28:-5:48:::
BM06	37	1	0.011236	TGTGCCAGCAGTCAATCCTACGAGCAGTACTTC	EECE7BDE:A?EBEEEAEEEDDDEEECEEDCEE	TRBV28*00(264)		TRBJ2-7*00(205)		427|439|464|0|12||60.0		21|39|67|15|33||90.0		NA	NA	NA	NA	NA	NA	NA	NA	NA	NA	TGTGCCAGCAGTCAATCCTACGAGCAGTACTTC	22	NA	NA	NA	NA	NA	NA	NA	CASSQSYEQYF	NA	:::::::::0:-5:12:::::15:-1:33:::
BM06	38	1	0.011236	TGTGCCAGCAGGGATGGACTGACCTACGAGCAGTACTTC	?DCC7EDEEEDE@DDEBB>DADE<AAD>DDBCCECAE>D	TRBV28*00(195)	TRBD2*00(25)	TRBJ2-7*00(193)		427|438|464|0|11||55.0	17|22|48|15|20||25.0	22|39|67|22|39||85.0		NA	NA	NA	NA	NA	NA	NA	NA	NA	NA	TGTGCCAGCAGGGATGGACTGACCTACGAGCAGTACTTC	22	NA	NA	NA	NA	NA	NA	NA	CASRDGLTYEQYF	NA	:::::::::0:-6:11:15:-1:-10:20:22:-2:39:::
BM06	39	1	0.011236	TGCAGCGTTGGATCTGGGGGGACTAATGAAAAACTGTTTTTT	EEEEEDEEEECE?EEEEBEE=DEEEEEEEEDEEEEEEEEEEE	TRBV29-1*00(257)	TRBD1*00(25)	TRBJ1-4*00(140)		421|431|455|0|10||50.0	18|23|36|15|20||25.0	22|43|71|21|42||105.0		NA	NA	NA	NA	NA	NA	NA	NA	NA	NA	TGCAGCGTTGGATCTGGGGGGACTAATGAAAAACTGTTTTTT	28	NA	NA	NA	NA	NA	NA	NA	CSVGSGGTNEKLFF	NA	:::::::::0:-4:10:15:-6:-1:20:21:-2:42:::
BM06	40	1	0.011236	TGCAGCGTTGAAGGGGGGGGGGCCTACGAGCAGTACTTC	EEEEEEEEEEDEEEEECEEEEEE@EDEEEEEEFEECEFD	TRBV29-1*00(288)	TRBD1*00(25)	TRBJ2-7*00(85)		421|434|455|0|13||65.0	18|23|36|13|18||25.0	22|39|67|22|39||85.0		NA	NA	NA	NA	NA	NA	NA	NA	NA	NA	TGCAGCGTTGAAGGGGGGGGGGCCTACGAGCAGTACTTC	31	NA	NA	NA	NA	NA	NA	NA	CSVEGGGAYEQYF	NA	:::::::::0:-1:13:13:-6:-1:18:22:-2:39:::
BM06	41	1	0.011236	TGTGCCAGCAGTGACTCTCGGCTAGCCGGGGAGCTGTTTTTT	BBCDE=?BEEDD=6C;?B>EDD>9B?CEBDEE>CE?EAEEED	TRBV6-4*00(194)	TRBD2*00(25)	TRBJ2-2*00(225)		427|444|464|0|17||85.0	7|12|48|20|25||25.0	26|43|71|25|42||85.0		NA	NA	NA	NA	NA	NA	NA	NA	NA	NA	TGTGCCAGCAGTGACTCTCGGCTAGCCGGGGAGCTGTTTTTT	21	NA	NA	NA	NA	NA	NA	NA	CASSDSRLAGELFF	NA	:::::::::0:0:17:20:9:-20:25:25:-6:42:::
BM06	42	1	0.011236	TGTGCCAGCGGGCAATATCGGTTGGATGGCTACACCTTC	E8EC>EEDCEDE<EBEEAABDEEDEEECCBDDEC@DEEB	TRBV6-1*00(185),TRBV6-5*00(185),TRBV6-6*00(185),TRBV6-2*00(169),TRBV6-3*00(169)		TRBJ1-2*00(210)		427|436|464|0|9||45.0;427|436|464|0|9||45.0;427|436|464|0|9||45.0;427|436|464|0|9||45.0;427|436|464|0|9||45.0		26|40|68|25|39||70.0		NA	NA	NA	NA	NA	NA	NA	NA	NA	NA	TGTGCCAGCGGGCAATATCGGTTGGATGGCTACACCTTC	23	NA	NA	NA	NA	NA	NA	NA	CASGQYRLDGYTF	NA	:::::::::0:-8:9:::::25:-6:39:::
BM06	43	1	0.011236	TGTGCCAGCAATCCCGGGACAGGGCTTTCTGGCTATACCTTC	DEDDE=7EDECAEDBEDE>EACECEEBEDECDDEDED@9EEB	TRBV6-1*00(159),TRBV6-5*00(159),TRBV6-6*00(159),TRBV6-2*00(143),TRBV6-3*00(143)	TRBD1*00(65)	TRBJ1-2*00(189)		427|437|464|0|10||50.0;427|437|464|0|10||50.0;427|437|464|0|10||50.0;427|437|464|0|10||50.0;427|437|464|0|10||50.0	8|21|36|11|24||65.0	27|40|68|29|42|SC33T|49.0		NA	NA	NA	NA	NA	NA	NA	NA	NA	NA	TGTGCCAGCAATCCCGGGACAGGGCTTTCTGGCTATACCTTC	22	NA	NA	NA	NA	NA	NA	NA	CASNPGTGLSGYTF	NA	:::::::::0:-7:10:11:4:-3:24:29:-7:42:::
BM06	44	1	0.011236	TGTGCCAGCAGTTACCAGGGCGCAACTAATGAAAAACTGTTTTTT	DDED6=;DEE7ACA<CE9;ED>;D6=EEEEABCDA6CDCDC;@?A	TRBV6-5*00(204),TRBV6-6*00(204),TRBV6-1*00(189),TRBV6-8*00(188)	TRBD1*00(25),TRBD2*00(25)	TRBJ1-4*00(250)		427|442|464|0|15||75.0;427|442|464|0|15||75.0;427|439|464|0|12||60.0;424|439|461|0|15||75.0	16|21|36|15|20||25.0;28|33|48|16|21||25.0	19|43|71|21|45||120.0		NA	NA	NA	NA	NA	NA	NA	NA	NA	NA	TGTGCCAGCAGTTACCAGGGCGCAACTAATGAAAAACTGTTTTTT	21	NA	NA	NA	NA	NA	NA	NA	CASSYQGATNEKLFF	NA	:::::::::0:-2:15:15:-4:-3:20:21:1:45:::
BM06	46	1	0.011236	TGTGCCAGCAGCCCCGACAGATTCAATCAGCCCCAGCATTTT	DECEEEEEEEFEBEE;C@EEAEDDEDEEEECEDED>EEEEE?	TRBV6-1*00(216),TRBV6-5*00(216),TRBV6-8*00(216),TRBV6-6*00(200),TRBV6-2*00(190)	TRBD1*00(25)	TRBJ1-5*00(90)		427|438|464|0|11||55.0;427|438|464|0|11||55.0;424|435|461|0|11||55.0;427|438|464|0|11||55.0;427|438|464|0|11||55.0	14|19|36|15|20||25.0	23|42|70|23|42||95.0		NA	NA	NA	NA	NA	NA	NA	NA	NA	NA	TGTGCCAGCAGCCCCGACAGATTCAATCAGCCCCAGCATTTT	26	NA	NA	NA	NA	NA	NA	NA	CASSPDRFNQPQHF	NA	:::::::::0:-6:11:15:-2:-5:20:23:-3:42:::
BM06	48	1	0.011236	TGTGCCACCACGTTTCAGGGCGACACCGGGGAGCTGTTTTTT	EEBEEEEEEEED7DEECFAEED@AEEEDE?EDECEC:EEEDB	TRBV6-1*00(196),TRBV6-9*00(196),TRBV6-6*00(180)	TRBD1*00(25),TRBD2*00(25)	TRBJ2-2*00(105)		427|434|464|0|7||35.0;427|434|464|0|7||35.0;427|434|464|0|7||35.0	16|21|36|15|20||25.0;28|33|48|16|21||25.0	23|43|71|22|42||100.0		NA	NA	NA	NA	NA	NA	NA	NA	NA	NA	TGTGCCACCACGTTTCAGGGCGACACCGGGGAGCTGTTTTTT	22	NA	NA	NA	NA	NA	NA	NA	CATTFQGDTGELFF	NA	:::::::::0:-10:7:15:-4:-3:20:22:-3:42:::
BM06	49	1	0.011236	TGTGCCAGCAGCTTAGCGCTAGACGAGGAGACCCAGTACTTC	D>DDEEDCEE::DEDDECED@@CDEEDDEADEDBEEEDBEDE	TRBV7-8*00(255),TRBV7-2*00(239)		TRBJ2-5*00(215)		430|451|467|0|21||105.0;430|451|467|0|21||105.0		25|40|68|27|42||75.0		NA	NA	NA	NA	NA	NA	NA	NA	NA	NA	TGTGCCAGCAGCTTAGCGCTAGACGAGGAGACCCAGTACTTC	25	NA	NA	NA	NA	NA	NA	NA	CASSLALDEETQYF	NA	:::::::::0:4:21:::::27:-5:42:::
BM06	50	1	0.011236	TGTGCCAGCAGCTCCGGACTAGAAGGCTACACCTTC	DEE8EDBBEEBEDC?DBDCEE;EED?EE6E@DCEEC	TRBV7-9*00(220)	TRBD2*00(35)	TRBJ1-2*00(200)		430|443|467|0|13||65.0	17|24|48|15|22||35.0	28|40|68|24|36||60.0		NA	NA	NA	NA	NA	NA	NA	NA	NA	NA	TGTGCCAGCAGCTCCGGACTAGAAGGCTACACCTTC	21	NA	NA	NA	NA	NA	NA	NA	CASSSGLEGYTF	NA	:::::::::0:-4:13:15:-1:-8:22:24:-8:36:::
BM07	19	17	0.607143	TGTGCCAGCGATAGCTCCTACGAGCAGTACTTC	FFFFFFFFFFEFEFFFFFFEFEFFFFFFFFFFF	TRBV6-5*00(206.9),TRBV6-1*00(193.9),TRBV6-8*00(193.9)		TRBJ2-7*00(212.1)		427|436|464|0|9||45.0;427|436|464|0|9||45.0;424|433|461|0|9||45.0		18|39|67|12|33||105.0		NA	NA	NA	NA	NA	NA	NA	NA	NA	NA	TGTGCCAGCGATAGCTCCTACGAGCAGTACTTC	36	NA	NA	NA	NA	NA	NA	NA	CASDSSYEQYF	NA	:::::::::0:-8:9:::::12:2:33:::
BM07	88	4	0.142857	TGTGCCAGCAGTGAAGTGGGCTACGAGCAGTACTTC	EEEEEEEEEEEDEEEEEEEEE?EEEEEEEEEEEEEE	TRBV6-1*00(219.7),TRBV6-5*00(199.7),TRBV6-6*00(199.7)		TRBJ2-7*00(220)		427|443|464|0|16||80.0;427|439|464|0|12||60.0;427|439|464|0|12||60.0		23|39|67|20|36||80.0		NA	NA	NA	NA	NA	NA	NA	NA	NA	NA	TGTGCCAGCAGTGAAGTGGGCTACGAGCAGTACTTC	30	NA	NA	NA	NA	NA	NA	NA	CASSEVGYEQYF	NA	:::::::::0:-1:16:::::20:-3:36:::
BM07	90	3	0.107143	TGTGCCAGCAGTGAATGGGGCGGGGAGCTGGGCACTGAAGCTTTCTTT	EEEEEEEEDEEEEEEEEEEECDEEEEEEEEEEEEEEEEEEDECEEEEE	TRBV6-1*00(211),TRBV6-5*00(196),TRBV6-6*00(188)	TRBD1*00(30)	TRBJ1-1*00(212)		427|442|464|0|15||75.0;427|439|464|0|12||60.0;427|439|464|0|12||60.0	19|25|36|16|22||30.0	24|40|68|32|48||80.0		NA	NA	NA	NA	NA	NA	NA	NA	NA	NA	TGTGCCAGCAGTGAATGGGGCGGGGAGCTGGGCACTGAAGCTTTCTTT	34	NA	NA	NA	NA	NA	NA	NA	CASSEWGGELGTEAFF	NA	:::::::::0:-2:15:16:-7:1:22:32:-4:48:::
BM07	96	1	0.0357143	TGTGCCATCGGGGCAGGGGGGTTGACTGAAGCTTTCTTT	DEBDBE?<EDDEEB<EEDDCEBAEDECEE;DCDEEDEEE	TRBV10-3*00(169)	TRBD1*00(39)	TRBJ1-1*00(215)		427|436|464|0|9||45.0	12|23|36|9|20|SA15G|39.0	25|40|68|24|39||75.0		NA	NA	NA	NA	NA	NA	NA	NA	NA	NA	TGTGCCATCGGGGCAGGGGGGTTGACTGAAGCTTTCTTT	26	NA	NA	NA	NA	NA	NA	NA	CAIGAGGLTEAFF	NA	:::::::::0:-8:9:9:0:-1:20:24:-5:39:::
BM07	97	1	0.0357143	TGTGCCAGCAGTTTTGATCACGAGCAGTACTTC	EEED@EDBECCCEDCDCEBBCCDDBADEAB@>>	TRBV12-3*00(240),TRBV12-4*00(240)		TRBJ2-7*00(210)		430|444|467|0|14||70.0;430|444|467|0|14||70.0		25|39|67|19|33||70.0		NA	NA	NA	NA	NA	NA	NA	NA	NA	NA	TGTGCCAGCAGTTTTGATCACGAGCAGTACTTC	29	NA	NA	NA	NA	NA	NA	NA	CASSFDHEQYF	NA	:::::::::0:-3:14:::::19:-5:33:::
BM07	98	1	0.0357143	TGTGCCAGCATAACAGGGGATAGTTCACCCCTCCACTTT	BEBE;DEDCE=EDAEEDDEE>CE@EBEED>B9CEDDCEE	TRBV2*00(174)	TRBD1*00(35)	TRBJ1-6*00(208)		430|440|467|0|10||50.0	15|22|36|12|19||35.0	25|45|73|19|39|SA28G|84.0		NA	NA	NA	NA	NA	NA	NA	NA	NA	NA	TGTGCCAGCATAACAGGGGATAGTTCACCCCTCCACTTT	24	NA	NA	NA	NA	NA	NA	NA	CASITGDSSPLHF	NA	:::::::::0:-7:10:12:-3:-2:19:19:-5:39:::
BM07	99	1	0.0357143	TGTGCCAGCAGTACTACTAGCGGGGGGGCCGAGACCCAGTACTTC	ECE?DB@DBD<;DCD?D>879CED?EEDEDCED?EDD@BEEED?C	TRBV6-2*00(195),TRBV6-3*00(195),TRBV6-1*00(179),TRBV6-5*00(179),TRBV6-6*00(179)	TRBD2*00(59)	TRBJ2-5*00(215)		427|439|464|0|12||60.0;427|439|464|0|12||60.0;427|439|464|0|12||60.0;427|439|464|0|12||60.0;427|439|464|0|12||60.0	19|34|48|15|30|SA28G|59.0	25|40|68|30|45||75.0		NA	NA	NA	NA	NA	NA	NA	NA	NA	NA	TGTGCCAGCAGTACTACTAGCGGGGGGGCCGAGACCCAGTACTTC	22	NA	NA	NA	NA	NA	NA	NA	CASSTTSGGAETQYF	NA	:::::::::0:-5:12:15:-3:2:30:30:-5:45:::
BM08	80	11	0.6875	TGTGCCAGCAGCTTGGGGACTAGCGGGGAACAAAATGAGCAGTTCTTC	FEFFFFEEFFEEEFEFFEEEFEFEEEFFEEEFFEFFEEFFFFEEEEEE	TRBV7-6*00(311),TRBV7-3*00(279),TRBV7-7*00(279)	TRBD2*00(60)	TRBJ2-1*00(157)		430|444|467|0|14||70.0;430|444|467|0|14||70.0;430|444|467|0|14||70.0	16|28|48|15|27||60.0	27|42|70|33|48||75.0		NA	NA	NA	NA	NA	NA	NA	NA	NA	NA	TGTGCCAGCAGCTTGGGGACTAGCGGGGAACAAAATGAGCAGTTCTTC	36	NA	NA	NA	NA	NA	NA	NA	CASSLGTSGEQNEQFF	NA	:::::::::0:-3:14:15:0:-4:27:33:-7:48:::
BM08	738	2	0.125	TGTGCCAGCAGTTTAGCGAGGCGAGGACAGTACAATGAGCAGTTCTTC	EEEEEEFEEFEEEEFFEEEEFEEFFEEEFFEEFEFFEEEEEEEFEFFE	TRBV12-3*00(283),TRBV12-4*00(283)	TRBD1*00(30)	TRBJ2-1*00(230)		430|448|467|0|18||90.0;430|448|467|0|18||90.0	13|19|36|24|30||30.0	24|42|70|30|48||90.0		NA	NA	NA	NA	NA	NA	NA	NA	NA	NA	TGTGCCAGCAGTTTAGCGAGGCGAGGACAGTACAATGAGCAGTTCTTC	36	NA	NA	NA	NA	NA	NA	NA	CASSLARRGQYNEQFF	NA	:::::::::0:1:18:24:-1:-5:30:30:-4:48:::
BM08	739	2	0.125	TGTGCCAGCAGTTTGCCCGCCAAAAACATTCAGTACTTC	EEEEEEEEEEEFEEEFEEEEFEFEEFFEEEFEEEEEEFE	TRBV28*00(274)		TRBJ2-4*00(235)		427|441|464|0|14||70.0		21|42|70|18|39||105.0		NA	NA	NA	NA	NA	NA	NA	NA	NA	NA	TGTGCCAGCAGTTTGCCCGCCAAAAACATTCAGTACTTC	36	NA	NA	NA	NA	NA	NA	NA	CASSLPAKNIQYF	NA	:::::::::0:-3:14:::::18:-1:39:::
BM08	844	1	0.0625	TGCAGTGCTAGAACGACAGGTAGTAGCTATGGCTACACCTTC	EEEEEEEEEEEEEEEEEEEEEEEEEEE?EEDDEBEECEEECE	TRBV20-1*00(398)	TRBD1*00(30)	TRBJ1-2*00(220)		421|433|455|0|12||60.0	14|20|36|14|20||30.0	24|40|68|26|42||80.0		NA	NA	NA	NA	NA	NA	NA	NA	NA	NA	TGCAGTGCTAGAACGACAGGTAGTAGCTATGGCTACACCTTC	30	NA	NA	NA	NA	NA	NA	NA	CSARTTGSSYGYTF	NA	:::::::::0:-2:12:14:-2:-4:20:26:-4:42:::
BM09	15	185	0.263158	TGTGCCAGCAGCGTCGAAACGGCACCCGGGGAGCTGTTTTTT	FFFFFFFFFFFFFFEFFFFFFFFFFFFFFFFFFFFFFFFFFF	TRBV9*00(362.7)		TRBJ2-2*00(224.7)		427|441|463|0|14||70.0		26|43|71|25|42||85.0		NA	NA	NA	NA	NA	NA	NA	NA	NA	NA	TGTGCCAGCAGCGTCGAAACGGCACCCGGGGAGCTGTTTTTT	36	NA	NA	NA	NA	NA	NA	NA	CASSVETAPGELFF	NA	:::::::::0:-2:14:::::25:-6:42:::
BM09	22	147	0.209104	TGTGCCAGCAGGAACGACAGGGACAATTCACCCCTCCACTTT	FFFFFFFFFFFFEFFFFFFFFFFFFFFFFFFFFFFFFFFFFF	TRBV12-3*00(247.6),TRBV12-4*00(247.6)	TRBD1*00(35)	TRBJ1-6*00(213.9)		430|441|467|0|11||55.0;430|441|467|0|11||55.0	14|21|36|15|22||35.0	27|45|73|24|42||90.0		NA	NA	NA	NA	NA	NA	NA	NA	NA	NA	TGTGCCAGCAGGAACGACAGGGACAATTCACCCCTCCACTTT	36	NA	NA	NA	NA	NA	NA	NA	CASRNDRDNSPLHF	NA	:::::::::0:-6:11:15:-2:-3:22:24:-7:42:::
BM09	48	100	0.142248	TGTGCCATCAGTGATGGCCAGGGGAGCTACAATGAGCAGTTCTTC	FFFFFFFFFFFFFFFFFFFFFFFFFFFFFFFFFFFFFFFFFFFFF	TRBV10-3*00(245.7)	TRBD1*00(30)	TRBJ2-1*00(234.8)		427|441|464|0|14||70.0	16|22|36|18|24||30.0	23|42|70|26|45||95.0		NA	NA	NA	NA	NA	NA	NA	NA	NA	NA	TGTGCCATCAGTGATGGCCAGGGGAGCTACAATGAGCAGTTCTTC	37	NA	NA	NA	NA	NA	NA	NA	CAISDGQGSYNEQFF	NA	:::::::::0:-3:14:18:-4:-2:24:26:-3:45:::
BM09	53	83	0.118065	TGTGCCAGCAGGGTTCTCTCCTACGAGCAGTACTTC	FFFFFFFFFFFFFFFFFFFFFFFFFFFFFFFFFFFF	TRBV6-2*00(232),TRBV6-3*00(232)		TRBJ2-7*00(235)		427|438|464|0|11||55.0;427|438|464|0|11||55.0		20|39|67|17|36||95.0		NA	NA	NA	NA	NA	NA	NA	NA	NA	NA	TGTGCCAGCAGGGTTCTCTCCTACGAGCAGTACTTC	37	NA	NA	NA	NA	NA	NA	NA	CASRVLSYEQYF	NA	:::::::::0:-6:11:::::17:0:36:::
BM09	60	70	0.0995733	TGTGCCAGCAGTAATTTAAGAGAATTTGAGTACGAGCAGTACTTC	FFFFFFFFFFFFFFFFFFFFFFFFFFFFFFFFFFFFFFFFFFFFF	TRBV25-1*00(195)		TRBJ2-7*00(135)		427|439|464|0|12||60.0		24|39|67|30|45||75.0		NA	NA	NA	NA	NA	NA	NA	NA	NA	NA	TGTGCCAGCAGTAATTTAAGAGAATTTGAGTACGAGCAGTACTTC	37	NA	NA	NA	NA	NA	NA	NA	CASSNLREFEYEQYF	NA	:::::::::0:-5:12:::::30:-4:45:::
BM09	62	55	0.0782361	TGTGCCAGCAGGAACACAGGGGGCGACGAAAAACTGTTTTTT	FFEFFFFFFFFFFFFFFFFFFFFFFFFFFFFFFFFFFFFFFF	TRBV6-3*00(236.1),TRBV6-2*00(228.6)	TRBD1*00(50)	TRBJ1-4*00(176)		427|438|464|0|11||55.0;427|438|464|0|11||55.0	15|25|36|15|25||50.0	28|43|71|27|42||75.0		NA	NA	NA	NA	NA	NA	NA	NA	NA	NA	TGTGCCAGCAGGAACACAGGGGGCGACGAAAAACTGTTTTTT	36	NA	NA	NA	NA	NA	NA	NA	CASRNTGGDEKLFF	NA	:::::::::0:-6:11:15:-3:1:25:27:-8:42:::
BM09	69	25	0.0355619	TGTGCCAGCAGTTATCAGGGGGCCACTGAAGCTTTCTTT	FFFFFFEFFFFFFEFFFFFFFFFFFFFFEFFEFFFEFFF	TRBV6-5*00(245.7),TRBV6-8*00(245.7),TRBV6-1*00(235.7),TRBV6-6*00(229.7)	TRBD1*00(40)	TRBJ1-1*00(220)		427|441|464|0|14||70.0;424|438|461|0|14||70.0;427|439|464|0|12||60.0;427|441|464|0|14||70.0	16|24|36|15|23||40.0	24|40|68|23|39||80.0		NA	NA	NA	NA	NA	NA	NA	NA	NA	NA	TGTGCCAGCAGTTATCAGGGGGCCACTGAAGCTTTCTTT	36	NA	NA	NA	NA	NA	NA	NA	CASSYQGATEAFF	NA	:::::::::0:-3:14:15:-4:0:23:23:-4:39:::
BM09	71	6	0.00853485	TGTGCCAGCAGTTTACCCCTTTCCGGGACAGGGGGCACTGAAGCTTTCTTT	EEEEDEDEEEEDEE?EDBEDEEECEEECEEEEEEEEDEDEECDEDDDEDDE	TRBV28*00(155)	TRBD1*00(65)	TRBJ1-1*00(193.3)		427|442|464|0|15||75.0	10|23|36|22|35||65.0	24|40|68|35|51||80.0		NA	NA	NA	NA	NA	NA	NA	NA	NA	NA	TGTGCCAGCAGTTTACCCCTTTCCGGGACAGGGGGCACTGAAGCTTTCTTT	30	NA	NA	NA	NA	NA	NA	NA	CASSLPLSGTGGTEAFF	NA	:::::::::0:-2:15:22:2:-1:35:35:-4:51:::
BM09	76	3	0.00426743	TGTGCCAGCGGGTTACCTAATTCACCCCTCCACTTT	EEEEDDEEDEEDEEDDDEEDEEE9D??AE?CEDEEE	TRBV12-3*00(177.3),TRBV12-4*00(177.3)		TRBJ1-6*00(203)		430|439|467|0|9||45.0;430|439|467|0|9||45.0		26|45|73|17|36||95.0		NA	NA	NA	NA	NA	NA	NA	NA	NA	NA	TGTGCCAGCGGGTTACCTAATTCACCCCTCCACTTT	24	NA	NA	NA	NA	NA	NA	NA	CASGLPNSPLHF	NA	:::::::::0:-8:9:::::17:-6:36:::
BM09	78	2	0.00284495	TGTGCCAGCAGAAAGGCGGTTAGTGGTCAAGAGACCCAGTACTTC	DECB<CCB@DD?ED<@<DB>EEDBDD<BD7=DEDB@DDEBEDDDB	TRBV11-1*00(190),TRBV11-3*00(174)		TRBJ2-5*00(230)		430|441|467|0|11||55.0;430|441|467|0|11||55.0		22|40|68|27|45||90.0		NA	NA	NA	NA	NA	NA	NA	NA	NA	NA	TGTGCCAGCAGAAAGGCGGTTAGTGGTCAAGAGACCCAGTACTTC	22	NA	NA	NA	NA	NA	NA	NA	CASRKAVSGQETQYF	NA	:::::::::0:-6:11:::::27:-2:45:::
BM09	79	2	0.00284495	TGTGCCAGCAGCTTTAGCAGCAATCAGCCCCAGCATTTT	DEE?DE@EECEEEBEDECDCED9EEDD>:AAED?@ECEE	TRBV7-6*00(210),TRBV7-7*00(194)		TRBJ1-5*00(245)		430|444|467|0|14||70.0;430|444|467|0|14||70.0		21|42|70|18|39||105.0		NA	NA	NA	NA	NA	NA	NA	NA	NA	NA	TGTGCCAGCAGCTTTAGCAGCAATCAGCCCCAGCATTTT	24	NA	NA	NA	NA	NA	NA	NA	CASSFSSNQPQHF	NA	:::::::::0:-3:14:::::18:-1:39:::
BM09	80	2	0.00284495	TGTGCCAGCAGCTTAGTGAATCAGCCCCAGCATTTT	EEEDEEEEEDEDEEEEEEEE?EEEEDEEEDCCEDEE	TRBV7-9*00(235)		TRBJ1-5*00(230)		430|446|467|0|16||80.0		24|42|70|18|36||90.0		NA	NA	NA	NA	NA	NA	NA	NA	NA	NA	TGTGCCAGCAGCTTAGTGAATCAGCCCCAGCATTTT	30	NA	NA	NA	NA	NA	NA	NA	CASSLVNQPQHF	NA	:::::::::0:-1:16:::::18:-4:36:::
BM09	81	2	0.00284495	TGTGCCAGCAGCGAACAGGGTGTCTATGGCTACACCTTC	EEE?:DD@EECADEBEEEDEEDEED<ECDEECD8;EEED	TRBV9*00(205)	TRBD1*00(30)	TRBJ1-2*00(220)		427|440|463|0|13||65.0	15|21|36|14|20||30.0	24|40|68|23|39||80.0		NA	NA	NA	NA	NA	NA	NA	NA	NA	NA	TGTGCCAGCAGCGAACAGGGTGTCTATGGCTACACCTTC	23	NA	NA	NA	NA	NA	NA	NA	CASSEQGVYGYTF	NA	:::::::::0:-3:13:14:-3:-3:20:23:-4:39:::
BM09	84	1	0.00142248	TGTGCCATCAGTGAGTCTGGGACAGGGAATTCACCCCTCCACTTT	D@E?DCDEDEDEADE8EDEEE;EBED8CE@EECE<DCCDEDDE@E	TRBV10-3*00(195)	TRBD1*00(45)	TRBJ1-6*00(214)		427|444|464|0|17||85.0	12|21|36|18|27||45.0	27|45|73|27|45||90.0		NA	NA	NA	NA	NA	NA	NA	NA	NA	NA	TGTGCCATCAGTGAGTCTGGGACAGGGAATTCACCCCTCCACTTT	23	NA	NA	NA	NA	NA	NA	NA	CAISESGTGNSPLHF	NA	:::::::::0:0:17:18:0:-3:27:27:-7:45:::
BM09	85	1	0.00142248	TGTGCCAGCAGTCTTGGGACAGGGAAAAAACTGTTTTTT	EE9EEECEEDE=EECEDBBEDEEE<EE@DEEEDDDCDEE	TRBV12-3*00(253),TRBV12-4*00(253)	TRBD1*00(45)	TRBJ1-4*00(134)		430|442|467|0|12||60.0;430|442|467|0|12||60.0	12|21|36|15|24||45.0	29|43|71|25|39||70.0		NA	NA	NA	NA	NA	NA	NA	NA	NA	NA	TGTGCCAGCAGTCTTGGGACAGGGAAAAAACTGTTTTTT	24	NA	NA	NA	NA	NA	NA	NA	CASSLGTGKKLFF	NA	:::::::::0:-5:12:15:0:-3:24:25:-9:39:::
BM09	86	1	0.00142248	TGTGCCAGCAGTCGCCTCCTAGCGGGAGGTTACAATGAGCAGTTCTTC	DDAECEDEEEEDBCDEBEECEDEEEEEEEDBEDDEECEEBCAEEEEAE	TRBV12-3*00(253),TRBV12-4*00(253)	TRBD2*00(55)	TRBJ2-1*00(230)		430|442|467|0|12||60.0;430|442|467|0|12||60.0	20|31|48|18|29||55.0	24|42|70|30|48||90.0		NA	NA	NA	NA	NA	NA	NA	NA	NA	NA	TGTGCCAGCAGTCGCCTCCTAGCGGGAGGTTACAATGAGCAGTTCTTC	32	NA	NA	NA	NA	NA	NA	NA	CASSRLLAGGYNEQFF	NA	:::::::::0:-5:12:18:-4:-1:29:30:-4:48:::
BM09	87	1	0.00142248	TGTGCCAGCAGTTACGCCGGGGAGCTGTTTTTT	EAECEDEDEEEDE@EEE9EDD>DDDEEEEEDEE	TRBV12-3*00(235),TRBV12-4*00(235)		TRBJ2-2*00(225)		430|443|467|0|13||65.0;430|443|467|0|13||65.0		26|43|71|16|33||85.0		NA	NA	NA	NA	NA	NA	NA	NA	NA	NA	TGTGCCAGCAGTTACGCCGGGGAGCTGTTTTTT	24	NA	NA	NA	NA	NA	NA	NA	CASSYAGELFF	NA	:::::::::0:-4:13:::::16:-6:33:::
BM09	88	1	0.00142248	TGTGCCACCAGCAGAGTAATGGGAGGCTCCTATAATTCACCCCTCCACTTT	E@A;EDEEEEDDEEEEEEEDE?BED:EEEAEEEEDE?EA9=@?ECAB9DED	TRBV15*00(144)	TRBD2*00(25)	TRBJ1-6*00(270)		427|443|464|0|16||80.0	25|30|48|20|25||25.0	19|45|73|25|51||130.0		NA	NA	NA	NA	NA	NA	NA	NA	NA	NA	TGTGCCACCAGCAGAGTAATGGGAGGCTCCTATAATTCACCCCTCCACTTT	24	NA	NA	NA	NA	NA	NA	NA	CATSRVMGGSYNSPLHF	NA	:::::::::0:-1:16:20:-9:-2:25:25:1:51:::
BM09	89	1	0.00142248	TGTGCCAGTAGAATGTATAGCAATCAGCCCCAGCATTTT	EEEEEEEEEEFEFFEFDEEEEEEEEEEEEEEEDEEEEEF	TRBV19*00(319)		TRBJ1-5*00(260)		427|438|464|0|11||55.0		18|42|70|15|39||120.0		NA	NA	NA	NA	NA	NA	NA	NA	NA	NA	TGTGCCAGTAGAATGTATAGCAATCAGCCCCAGCATTTT	35	NA	NA	NA	NA	NA	NA	NA	CASRMYSNQPQHF	NA	:::::::::0:-6:11:::::15:2:39:::
BM09	90	1	0.00142248	TGTGCCAGTAGTATTAGCGGGAGTTCCTACAATGAGCAGTTCTTC	EEEDCEEEEDEECDEEEDECEEECEEEEDEEECDED;E;EDDEDD	TRBV19*00(334)	TRBD2*00(25)	TRBJ2-1*00(238)		427|441|464|0|14||70.0	21|26|48|14|19||25.0	16|42|70|19|45|SC20T|114.0		NA	NA	NA	NA	NA	NA	NA	NA	NA	NA	TGTGCCAGTAGTATTAGCGGGAGTTCCTACAATGAGCAGTTCTTC	26	NA	NA	NA	NA	NA	NA	NA	CASSISGSSYNEQFF	NA	:::::::::0:-3:14:14:-5:-6:19:19:4:45:::
BM09	91	1	0.00142248	TGTGCCAGCCACTCGGACGAAAAACTGTTTTTT	EEEEEEDEEEEEEEEEEEEEEEEEEEEEEEEEE	TRBV2*00(223)		TRBJ1-4*00(205)		430|439|467|0|9||45.0		28|43|71|18|33||75.0		NA	NA	NA	NA	NA	NA	NA	NA	NA	NA	TGTGCCAGCCACTCGGACGAAAAACTGTTTTTT	35	NA	NA	NA	NA	NA	NA	NA	CASHSDEKLFF	NA	:::::::::0:-8:9:::::18:-8:33:::
BM09	92	1	0.00142248	TGTGCCAGCAGTGGAGGGACAGGGCTTACAGATACGCAGTATTTT	EECEDCEDEE==EEDECEDDCEEE?EECEEEEBEBEEEEEDEEBE	TRBV2*00(324)	TRBD1*00(45)	TRBJ2-3*00(230)		430|443|467|0|13||65.0	12|21|36|15|24||45.0	23|41|69|27|45||90.0		NA	NA	NA	NA	NA	NA	NA	NA	NA	NA	TGTGCCAGCAGTGGAGGGACAGGGCTTACAGATACGCAGTATTTT	28	NA	NA	NA	NA	NA	NA	NA	CASSGGTGLTDTQYF	NA	:::::::::0:-4:13:15:0:-3:24:27:-3:45:::
BM09	93	1	0.00142248	TGTGCCAGCGACCCGCAGGGGAGGGGCGAGCAGTACTTC	EBDDEDEE<A9EEE:DCEDEECEEDC@E7EE?D;9E<EE	TRBV2*00(272)	TRBD2*00(35),TRBD1*00(30)	TRBJ2-7*00(189)		430|439|467|0|9||45.0	25|32|48|18|25||35.0;16|22|36|15|21||30.0	26|39|67|26|39||65.0		NA	NA	NA	NA	NA	NA	NA	NA	NA	NA	TGTGCCAGCGACCCGCAGGGGAGGGGCGAGCAGTACTTC	22	NA	NA	NA	NA	NA	NA	NA	CASDPQGRGEQYF	NA	:::::::::0:-8:9:18:-9:0:25:26:-6:39:::
BM09	94	1	0.00142248	TGCAGTGCTAGAAACAGGGTGGAGGCTTTCTTT	DC;@<B>ED8CC:9D9?EC>CD=@:D;A@D=AA	TRBV20-1*00(230)	TRBD1*00(30)	TRBJ1-1*00(185)		421|433|455|0|12||60.0	15|21|36|13|19||30.0	31|40|68|24|33||45.0		NA	NA	NA	NA	NA	NA	NA	NA	NA	NA	TGCAGTGCTAGAAACAGGGTGGAGGCTTTCTTT	23	NA	NA	NA	NA	NA	NA	NA	CSARNRVEAFF	NA	:::::::::0:-2:12:13:-3:-3:19:24:-11:33:::
BM09	96	1	0.00142248	TGTGCCAGCAGTGAACAGGGTAGCTCCTACAATGAGCAGTTCTTC	ACE@6E;EEDEDD6?DDEEE@BD7EEEEABADEDDE>EDBEEDCA	TRBV27*00(150),TRBV6-1*00(133)	TRBD1*00(30)	TRBJ2-1*00(260)		427|439|464|0|12||60.0;427|442|464|0|15||75.0	15|21|36|14|20||30.0	18|42|70|21|45||120.0		NA	NA	NA	NA	NA	NA	NA	NA	NA	NA	TGTGCCAGCAGTGAACAGGGTAGCTCCTACAATGAGCAGTTCTTC	21	NA	NA	NA	NA	NA	NA	NA	CASSEQGSSYNEQFF	NA	:::::::::0:-5:12:14:-3:-3:20:21:2:45:::
BM09	97	1	0.00142248	TGTGCCAGCACCATACCTTCGGGGCTCTATGGCTACACCTTC	EEEDEEE9EEEEEEEEEEECEEEE>EEDCEDEEEDEDFEBEE	TRBV28*00(254)	TRBD1*00(25)	TRBJ1-2*00(150)		427|437|464|0|10||50.0	19|24|36|20|25||25.0	24|40|68|26|42||80.0		NA	NA	NA	NA	NA	NA	NA	NA	NA	NA	TGTGCCAGCACCATACCTTCGGGGCTCTATGGCTACACCTTC	24	NA	NA	NA	NA	NA	NA	NA	CASTIPSGLYGYTF	NA	:::::::::0:-7:10:20:-7:0:25:26:-4:42:::
BM09	98	1	0.00142248	TGTGCCAGCAGCAACCGGGACACTCATGAAAAACTGTTTTTT	E@DE>EEEB<CDCDB=DDAEB=E@DE?DDECEBDD>ECBDDD	TRBV5-4*00(204),TRBV5-8*00(188)	TRBD1*00(35),TRBD2*00(35)	TRBJ1-4*00(219)		427|439|463|0|12||60.0;427|439|463|0|12||60.0	10|17|36|14|21||35.0;14|21|48|14|21||35.0	22|43|71|21|42|SA25C|89.0		NA	NA	NA	NA	NA	NA	NA	NA	NA	NA	TGTGCCAGCAGCAACCGGGACACTCATGAAAAACTGTTTTTT	27	NA	NA	NA	NA	NA	NA	NA	CASSNRDTHEKLFF	NA	:::::::::0:-4:12:14:2:-7:21:21:-2:42:::
BM09	99	1	0.00142248	TGTGCCAGCAGTGTAGACATCTCTGGGGCCAACGTCCTGACTTTC	DCBBECDECEEDBEBCAABE8E=EDCEEBDCEC@EDBEEB;EBEC	TRBV6-1*00(242),TRBV6-5*00(237),TRBV6-8*00(237),TRBV6-6*00(221)		TRBJ2-6*00(265)		427|440|464|0|13||65.0;427|439|464|0|12||60.0;424|436|461|0|12||60.0;427|439|464|0|12||60.0		20|45|73|20|45||125.0		NA	NA	NA	NA	NA	NA	NA	NA	NA	NA	TGTGCCAGCAGTGTAGACATCTCTGGGGCCAACGTCCTGACTTTC	23	NA	NA	NA	NA	NA	NA	NA	CASSVDISGANVLTF	NA	:::::::::0:-4:13:::::20:0:45:::
BM09	100	1	0.00142248	TGTGCCAGCAGCTCCATCCGCTCCCTCTACAATGAGCAGTTCTTC	CEAD<DD>E:=DADE>B=7AABDAB;6>EDEEBD@E@EBD??ED?	TRBV6-2*00(145),TRBV6-3*00(145)	TRBD2*00(25)	TRBJ2-1*00(235)		427|438|464|0|11||55.0;427|438|464|0|11||55.0	2|7|48|20|25||25.0	23|42|70|26|45||95.0		NA	NA	NA	NA	NA	NA	NA	NA	NA	NA	TGTGCCAGCAGCTCCATCCGCTCCCTCTACAATGAGCAGTTCTTC	21	NA	NA	NA	NA	NA	NA	NA	CASSSIRSLYNEQFF	NA	:::::::::0:-6:11:20:14:-25:25:26:-3:45:::
BM09	103	1	0.00142248	TGTGCCAGCAGACCACCGGGAGGAGGTTTGTACGAGCAGTACTTC	EEDEDEEEDEEEEEDDBEEEEEEEEEDEEEDEEEEEEDEEEEEEE	TRBV6-1*00(165),TRBV6-5*00(165),TRBV6-6*00(165),TRBV6-2*00(149),TRBV6-3*00(149)	TRBD2*00(35),TRBD1*00(30)	TRBJ2-7*00(215)		427|438|464|0|11||55.0;427|438|464|0|11||55.0;427|438|464|0|11||55.0;427|438|464|0|11||55.0;427|438|464|0|11||55.0	24|31|48|16|23||35.0;10|16|36|15|21||30.0	24|39|67|30|45||75.0		NA	NA	NA	NA	NA	NA	NA	NA	NA	NA	TGTGCCAGCAGACCACCGGGAGGAGGTTTGTACGAGCAGTACTTC	33	NA	NA	NA	NA	NA	NA	NA	CASRPPGGGLYEQYF	NA	:::::::::0:-6:11:16:-8:-1:23:30:-4:45:::
BM09	104	1	0.00142248	TGTGCCAGCAGCCCGGACACCCTTAATACGCAGTATTTT	ECEEEECEEEEEEEAEDEEEDEEEEEEEEEEEEEBDE@E	TRBV7-2*00(327),TRBV7-8*00(317),TRBV7-3*00(285)	TRBD1*00(25)	TRBJ2-3*00(152)		430|442|467|0|12||60.0;430|442|467|0|12||60.0;430|442|467|0|12||60.0	13|18|36|14|19||25.0	27|41|69|25|39||70.0		NA	NA	NA	NA	NA	NA	NA	NA	NA	NA	TGTGCCAGCAGCCCGGACACCCTTAATACGCAGTATTTT	31	NA	NA	NA	NA	NA	NA	NA	CASSPDTLNTQYF	NA	:::::::::0:-5:12:14:-1:-6:19:25:-7:39:::
BM09	105	1	0.00142248	TGTGCCAGCACTTTTAACTCCTTGGCGGGAGTGCACAATGAGCAGTTCTTC	EEEEEEEEE:EEEEEDDEEEDEEEEEEEEEEDEEEEEEEEEEEEEECDEEE	TRBV11-2*00(155),TRBV7-2*00(155),TRBV11-3*00(139),TRBV5-8*00(139),TRBV7-8*00(139)	TRBD2*00(35)	TRBJ2-5*00(153)		430|440|467|0|10||50.0;430|440|467|0|10||50.0;430|440|467|0|10||50.0;427|437|463|0|10||50.0;430|440|467|0|10||50.0	23|30|48|24|31||35.0	31|40|68|42|51|SA35T|29.0		NA	NA	NA	NA	NA	NA	NA	NA	NA	NA	TGTGCCAGCACTTTTAACTCCTTGGCGGGAGTGCACAATGAGCAGTTCTTC	25	NA	NA	NA	NA	NA	NA	NA	CASTFNSLAGVHNEQFF	NA	:::::::::0:-7:10:24:-7:-2:31:42:-11:51:::
BM09	107	1	0.00142248	TGTGCCAGCAGCTGGGGGGCAGGGGATAATTCACCCCTCCACTTT	EEEED?@E@DB@CDEEEE?EEEEDEDCEEEEEDEDDDCCEEEDEE	TRBV7-8*00(175),TRBV7-2*00(159)	TRBD1*00(34)	TRBJ1-6*00(240)		430|443|467|0|13||65.0;430|443|467|0|13||65.0	12|22|36|15|25|SA15G|34.0	25|45|73|25|45||100.0		NA	NA	NA	NA	NA	NA	NA	NA	NA	NA	TGTGCCAGCAGCTGGGGGGCAGGGGATAATTCACCCCTCCACTTT	30	NA	NA	NA	NA	NA	NA	NA	CASSWGAGDNSPLHF	NA	:::::::::0:-4:13:15:0:-2:25:25:-5:45:::
BM09	108	1	0.00142248	TGTGCCAGCAGCTTAGAGAACACCGGGGAGCTGTTTTTT	EEEECE?ECEEEE?EDEEC:EC6>EEDEDEADDEEDEBE	TRBV7-9*00(200)		TRBJ2-2*00(202)		430|446|467|0|16||80.0		21|43|71|17|39||110.0		NA	NA	NA	NA	NA	NA	NA	NA	NA	NA	TGTGCCAGCAGCTTAGAGAACACCGGGGAGCTGTTTTTT	21	NA	NA	NA	NA	NA	NA	NA	CASSLENTGELFF	NA	:::::::::0:-1:16:::::17:-1:39:::
BM10	3	66	0.503817	TGTGCCAGCAGTGCATCAGGACTAAATACAGATACGCAGTATTTT	FFFFFFFFFFFEFFFFFFFFFFFFFFFFFFFFFFFFFFFFFFFFF	TRBV2*00(322.1)	TRBD2*00(30)	TRBJ2-3*00(230)		430|443|467|0|13||65.0	17|23|48|18|24||30.0	23|41|69|27|45||90.0		NA	NA	NA	NA	NA	NA	NA	NA	NA	NA	TGTGCCAGCAGTGCATCAGGACTAAATACAGATACGCAGTATTTT	36	NA	NA	NA	NA	NA	NA	NA	CASSASGLNTDTQYF	NA	:::::::::0:-4:13:18:-1:-9:24:27:-3:45:::
BM10	4	60	0.458015	TGTGCCAGCAGGCCCCTCGACAGGGGAGCCCTCCACTTT	FFFFFFFFFFFFFFFFFFFFFFFFFFFFFFFFFFEFFFF	TRBV6-1*00(231.7),TRBV6-9*00(231.7),TRBV6-6*00(215.6)	TRBD1*00(40)	TRBJ1-6*00(195)		427|438|464|0|11||55.0;427|438|464|0|11||55.0;427|438|464|0|11||55.0	14|22|36|18|26||40.0	34|45|73|28|39||55.0		NA	NA	NA	NA	NA	NA	NA	NA	NA	NA	TGTGCCAGCAGGCCCCTCGACAGGGGAGCCCTCCACTTT	36	NA	NA	NA	NA	NA	NA	NA	CASRPLDRGALHF	NA	:::::::::0:-6:11:18:-2:-2:26:28:-14:39:::
BM10	62	2	0.0152672	TGTGCCAGCAGTTTAATCGGACTAGCGAACGAGCAGTACTTC	DE>DADEEECEE?AAC>DDEBD?DDBDD@DDDEEEE<@D=CA	TRBV28*00(200)	TRBD2*00(45)	TRBJ2-7*00(210)		427|442|464|0|15||75.0	17|26|48|18|27||45.0	25|39|67|28|42||70.0		NA	NA	NA	NA	NA	NA	NA	NA	NA	NA	TGTGCCAGCAGTTTAATCGGACTAGCGAACGAGCAGTACTTC	27	NA	NA	NA	NA	NA	NA	NA	CASSLIGLANEQYF	NA	:::::::::0:-2:15:18:-1:-6:27:28:-5:42:::
BM10	65	1	0.00763359	TGTGCCAGCAGTGAAGGACCCGCGCAGGGCGGCACTGAAGCTTTCTTT	DDEBBD;?:CEDE??>DC?:BCB;CED??ED@E8D=BEEE=BE?EBEC	TRBV6-1*00(175),TRBV6-5*00(155),TRBV6-6*00(155)	TRBD1*00(25),TRBD2*00(25)	TRBJ1-1*00(220)		427|443|464|0|16||80.0;427|439|464|0|12||60.0;427|439|464|0|12||60.0	16|21|36|24|29||25.0;4|9|48|18|23||25.0	24|40|68|32|48||80.0		NA	NA	NA	NA	NA	NA	NA	NA	NA	NA	TGTGCCAGCAGTGAAGGACCCGCGCAGGGCGGCACTGAAGCTTTCTTT	23	NA	NA	NA	NA	NA	NA	NA	CASSEGPAQGGTEAFF	NA	:::::::::0:-1:16:24:-4:-3:29:32:-4:48:::
BM10	66	1	0.00763359	TGTGCCAGCAGTGAAGTGGGCTACGAGCAGTACTTC	AEDD6EEEEDD@EEE?9EEEEDCDEEDDEEDDEB@C	TRBV6-1*00(235),TRBV6-5*00(215),TRBV6-6*00(215)		TRBJ2-7*00(220)		427|443|464|0|16||80.0;427|439|464|0|12||60.0;427|439|464|0|12||60.0		23|39|67|20|36||80.0		NA	NA	NA	NA	NA	NA	NA	NA	NA	NA	TGTGCCAGCAGTGAAGTGGGCTACGAGCAGTACTTC	21	NA	NA	NA	NA	NA	NA	NA	CASSEVGYEQYF	NA	:::::::::0:-1:16:::::20:-3:36:::
BM10	67	1	0.00763359	TGTGCCAGCACCCGGGACACCTACGAGCAGTACTTC	A;=EADC@?9BC:ED>AE8EBD>ECAEBD?ECDEDD	TRBV6-4*00(189)	TRBD1*00(45),TRBD2*00(40)	TRBJ2-7*00(145)		427|437|464|0|10||50.0	9|18|36|10|19||45.0;13|21|48|10|18||40.0	22|39|67|19|36||85.0		NA	NA	NA	NA	NA	NA	NA	NA	NA	NA	TGTGCCAGCACCCGGGACACCTACGAGCAGTACTTC	23	NA	NA	NA	NA	NA	NA	NA	CASTRDTYEQYF	NA	:::::::::0:-7:10:10:3:-6:19:19:-2:36:::
BM11	136	64	0.48855	TGTGCCAGCAGTCGGTTAAACCACGAGCAGTACTTC	FFEFFFFFFFFFFFFFFFFFFFFFFFFFFFFFFFFF	TRBV2*00(318)		TRBJ2-7*00(210)		430|442|467|0|12||60.0		25|39|67|22|36||70.0		NA	NA	NA	NA	NA	NA	NA	NA	NA	NA	TGTGCCAGCAGTCGGTTAAACCACGAGCAGTACTTC	36	NA	NA	NA	NA	NA	NA	NA	CASSRLNHEQYF	NA	:::::::::0:-5:12:::::22:-5:36:::
BM11	274	40	0.305344	TGTGCCAGCAGTTGGACCTCAGGGGTCGGCTACACCTTC	FFFFFFFFFFFEFFFEFFFFFFFFFEFFFFFEFFFFFFF	TRBV27*00(221),TRBV28*00(205)	TRBD1*00(30)	TRBJ1-2*00(200)		427|440|464|0|13||65.0;427|440|464|0|13||65.0	16|22|36|19|25||30.0	28|40|68|27|39||60.0		NA	NA	NA	NA	NA	NA	NA	NA	NA	NA	TGTGCCAGCAGTTGGACCTCAGGGGTCGGCTACACCTTC	36	NA	NA	NA	NA	NA	NA	NA	CASSWTSGVGYTF	NA	:::::::::0:-4:13:19:-4:-2:25:27:-8:39:::
BM11	550	14	0.10687	TGTGCCAGCAGTGAACAGTCAGGAGGGCCCTACGAGCAGTACGTC	FEFFEFFFFFFEFFFFFFEFFFFFFFFFFFEEFFFFFFFEFFFEF	TRBV6-2*00(235.9),TRBV6-3*00(235.9),TRBV6-1*00(218.9)	TRBD2*00(35)	TRBJ2-7*00(193)		427|439|464|0|12||60.0;427|439|464|0|12||60.0;427|442|464|0|15||75.0	26|33|48|21|28||35.0	22|39|67|28|45|ST36G|69.0		NA	NA	NA	NA	NA	NA	NA	NA	NA	NA	TGTGCCAGCAGTGAACAGTCAGGAGGGCCCTACGAGCAGTACGTC	36	NA	NA	NA	NA	NA	NA	NA	CASSEQSGGPYEQYV	NA	:::::::::0:-5:12:21:-10:1:28:28:-2:45:::
BM11	588	3	0.0229008	TGTGCCAGCAGTTACTCGGAGGAATACGAGCAGTACTTC	EEBEEEEDEBEED:DDDDEEDDDEEEDEDDDEEEDDBDD	TRBV6-2*00(212.7),TRBV6-6*00(207.3),TRBV6-5*00(202)		TRBJ2-7*00(195)		427|445|464|0|18||90.0;427|445|464|0|18||90.0;427|445|464|0|18||90.0		24|39|67|24|39||75.0		NA	NA	NA	NA	NA	NA	NA	NA	NA	NA	TGTGCCAGCAGTTACTCGGAGGAATACGAGCAGTACTTC	25	NA	NA	NA	NA	NA	NA	NA	CASSYSEEYEQYF	NA	:::::::::0:1:18:::::24:-4:39:::
BM11	613	1	0.00763359	TGTGCCACCTTAGAGGGTCTAGCGGGAGCTCTGACCCAGTACTTC	EE?ECEECCBEDEDEEEBEED;DECE@DEECEB:EEDDDE=EECE	TRBV10-3*00(154)	TRBD2*00(54)	TRBJ2-5*00(205)		427|434|464|0|7||35.0	16|30|48|14|28|SA19T|54.0	27|40|68|32|45||65.0		NA	NA	NA	NA	NA	NA	NA	NA	NA	NA	TGTGCCACCTTAGAGGGTCTAGCGGGAGCTCTGACCCAGTACTTC	25	NA	NA	NA	NA	NA	NA	NA	CATLEGLAGALTQYF	NA	:::::::::0:-10:7:14:0:-2:28:32:-7:45:::
BM11	614	1	0.00763359	TGCAGTGCTAGAGAACGGACAGGCAATCAGCCCCAGCATTTT	EEEEEEEE6EEEEEEEEEEEBCEEE@<EEDECBDEEE;EDEE	TRBV20-1*00(195)	TRBD1*00(30)	TRBJ1-5*00(240)		421|435|455|0|14||70.0	13|19|36|16|22||30.0	22|42|70|22|42||100.0		NA	NA	NA	NA	NA	NA	NA	NA	NA	NA	TGCAGTGCTAGAGAACGGACAGGCAATCAGCCCCAGCATTTT	21	NA	NA	NA	NA	NA	NA	NA	CSARERTGNQPQHF	NA	:::::::::0:0:14:16:-1:-5:22:22:-2:42:::
BM11	615	1	0.00763359	TGTGCCACCAGTGACCCCGGGACGCACAACTATGGCTACACCTTC	ECDEDEBCEECEECCEEEDEEC?C@AEEEEEEEEE>E<AEEDEEE	TRBV24-1*00(293)	TRBD1*00(40),TRBD2*00(40)	TRBJ1-2*00(110)		427|441|465|0|14||70.0	9|17|36|15|23||40.0;13|21|48|15|23||40.0	22|40|68|27|45||90.0		NA	NA	NA	NA	NA	NA	NA	NA	NA	NA	TGTGCCACCAGTGACCCCGGGACGCACAACTATGGCTACACCTTC	27	NA	NA	NA	NA	NA	NA	NA	CATSDPGTHNYGYTF	NA	:::::::::0:-4:14:15:3:-7:23:27:-2:45:::
BM11	616	1	0.00763359	TGTGCCAGCAGTTTACTCAGGGGACAGTCCTACTATGGCTACACCTTC	DCEAC>EDAECEEEE=D;E8DBACDD?E?E<C;BCBD:ADDA==9EDB	TRBV28*00(154)	TRBD1*00(35)	TRBJ1-2*00(225)		427|442|464|0|15||75.0	12|19|36|20|27||35.0	23|40|68|31|48||85.0		NA	NA	NA	NA	NA	NA	NA	NA	NA	NA	TGTGCCAGCAGTTTACTCAGGGGACAGTCCTACTATGGCTACACCTTC	23	NA	NA	NA	NA	NA	NA	NA	CASSLLRGQSYYGYTF	NA	:::::::::0:-2:15:20:0:-5:27:31:-3:48:::
BM11	617	1	0.00763359	TGCAGCGTTGAAGGGAGTGAGAACACTGAAGCTTTCTTT	BBADA;DDBED@EBE=ECBB@ADC8CE@:A<BBECDEBC	TRBV29-1*00(205)		TRBJ1-1*00(235)		421|434|455|0|13||65.0		21|40|68|20|39||95.0		NA	NA	NA	NA	NA	NA	NA	NA	NA	NA	TGCAGCGTTGAAGGGAGTGAGAACACTGAAGCTTTCTTT	23	NA	NA	NA	NA	NA	NA	NA	CSVEGSENTEAFF	NA	:::::::::0:-1:13:::::20:-1:39:::
BM11	618	1	0.00763359	TGTGCCAGCAGTGAAGCTAGCGGAACCTACAATGAGCAGTTCTTC	8EEA=D8AEECEEC;<DDEDE=C89C>E@CB>@BDCECEE7EEAE	TRBV6-1*00(175),TRBV6-4*00(160)	TRBD2*00(30)	TRBJ2-1*00(240)		427|444|464|0|17||85.0;427|441|464|0|14||70.0	21|27|48|17|23||30.0	22|42|70|25|45||100.0		NA	NA	NA	NA	NA	NA	NA	NA	NA	NA	TGTGCCAGCAGTGAAGCTAGCGGAACCTACAATGAGCAGTTCTTC	22	NA	NA	NA	NA	NA	NA	NA	CASSEASGTYNEQFF	NA	:::::::::0:0:17:17:-5:-5:23:25:-2:45:::
BM11	619	1	0.00763359	TGTGCCAGCAGTTATCTGTATGAGCAGTTCTTC	EEEEEEEEEEEEECDEEECDEEEEEEEECEEEE	TRBV6-5*00(220),TRBV6-6*00(220),TRBV6-1*00(210),TRBV6-9*00(209),TRBV6-2*00(204)		TRBJ2-1*00(210)		427|441|464|0|14||70.0;427|441|464|0|14||70.0;427|439|464|0|12||60.0;427|442|464|0|15||75.0;427|441|464|0|14||70.0		28|42|70|19|33||70.0		NA	NA	NA	NA	NA	NA	NA	NA	NA	NA	TGTGCCAGCAGTTATCTGTATGAGCAGTTCTTC	34	NA	NA	NA	NA	NA	NA	NA	CASSYLYEQFF	NA	:::::::::0:-3:14:::::19:-8:33:::
BM11	620	1	0.00763359	TGTGCCAGCAGCCCACGGGGTGGGTATAATTCACCCCTCCACTTT	EEEEEEEEEEEEEEDBEEEEEEEEEEEEEEDEEEADEDEEDAEEE	TRBV7-2*00(170)		TRBJ1-6*00(245)		430|442|467|0|12||60.0		24|45|73|24|45||105.0		NA	NA	NA	NA	NA	NA	NA	NA	NA	NA	TGTGCCAGCAGCCCACGGGGTGGGTATAATTCACCCCTCCACTTT	32	NA	NA	NA	NA	NA	NA	NA	CASSPRGGYNSPLHF	NA	:::::::::0:-5:12:::::24:-4:45:::
BM11	621	1	0.00763359	TGTGCCAGCAGCAGACAGGGCGTGAGCACAGATACGCAGTATTTT	EEBDFEEEEEEEDEEEEEDFEEEEEDEEDFEECEFEEA>B?EC8E	TRBV7-3*00(301),TRBV7-4*00(269)	TRBD1*00(35)	TRBJ2-3*00(245)		430|442|467|0|12||60.0;430|442|467|0|12||60.0	14|21|36|13|20||35.0	20|41|69|24|45||105.0		NA	NA	NA	NA	NA	NA	NA	NA	NA	NA	TGTGCCAGCAGCAGACAGGGCGTGAGCACAGATACGCAGTATTTT	23	NA	NA	NA	NA	NA	NA	NA	CASSRQGVSTDTQYF	NA	:::::::::0:-5:12:13:-2:-3:20:24:0:45:::
BM11	622	1	0.00763359	TGTGCCAGCAGCGGTAGTCTAGCGGGGGGCTACGAGCAGTACTTC	?C?9>6B?<DA7E9BD;D9D:CCECBDD8@DACDE?DEBCECDEC	TRBV9*00(175)	TRBD2*00(40)	TRBJ2-7*00(220)		427|440|463|0|13||65.0	20|28|48|18|26||40.0	23|39|67|29|45||80.0		NA	NA	NA	NA	NA	NA	NA	NA	NA	NA	TGTGCCAGCAGCGGTAGTCTAGCGGGGGGCTACGAGCAGTACTTC	21	NA	NA	NA	NA	NA	NA	NA	CASSGSLAGGYEQYF	NA	:::::::::0:-3:13:18:-4:-4:26:29:-3:45:::
BM12	0	24	0.208696	TGTGCCAGCAGTAGACTAGCGGGAGCCAACGAGCAGTACTTC	EEEEEEEEEEEEEEDEEEEEEEEEEEEEEEEEEEEEEEEEEE	TRBV6-1*00(145.8),TRBV6-5*00(136),TRBV6-6*00(136)	TRBD2*00(60)	TRBJ2-7*00(176.5)		427|439|464|0|12||60.0;427|439|464|0|12||60.0;427|439|464|0|12||60.0	18|30|48|13|25||60.0	25|39|67|28|42||70.0		NA	NA	NA	NA	NA	NA	NA	NA	NA	NA	TGTGCCAGCAGTAGACTAGCGGGAGCCAACGAGCAGTACTTC	35	NA	NA	NA	NA	NA	NA	NA	CASSRLAGANEQYF	NA	:::::::::0:-5:12:13:-2:-2:25:28:-5:42:::
BM12	21	12	0.104348	TGCGCCAGCAGCCAAAGCTCTGGGGCCAACGTCCTGACTTTC	FEEEEFEEFEFFEEEEEFEEEFEFEEFEEFFEFEFFEFEFFE	TRBV4-1*00(392.1)		TRBJ2-6*00(273.5)	TRBC2*00(90.5)	427|442|464|0|15||75.0		14|45|73|11|42|SG17A|139.0		NA	NA	NA	NA	NA	NA	NA	NA	NA	NA	TGCGCCAGCAGCCAAAGCTCTGGGGCCAACGTCCTGACTTTC	36	NA	NA	NA	NA	NA	NA	NA	CASSQSSGANVLTF	NA	:::::::::0:-2:15:::::11:6:42:::
BM12	27	9	0.0782609	TGTGCCAGCAGTTTCGGGTTTTCTGGAAACACCATATATTTT	DDEDEDDEDCEEDEDCEEDEEDEEEEECDEDDEDEEEDEEEE	TRBV28*00(192.3)		TRBJ1-3*00(245)		427|441|464|0|14||70.0		21|42|70|21|42||105.0		NA	NA	NA	NA	NA	NA	NA	NA	NA	NA	TGTGCCAGCAGTTTCGGGTTTTCTGGAAACACCATATATTTT	34	NA	NA	NA	NA	NA	NA	NA	CASSFGFSGNTIYF	NA	:::::::::0:-3:14:::::21:-1:42:::
BM12	30	8	0.0695652	TGCGCCAGCAGCTTTCAGGCGGACAGGGGGCTCGGCTACACCTTC	EEEEEEEEEEEEEEFEEEEEEFEEFFFFEEFEEEEFEEEEFFFEF	TRBV5-1*00(89)	TRBD1*00(55)	TRBJ1-2*00(200)		427|441|463|0|14||70.0	13|24|36|20|31||55.0	28|40|68|33|45||60.0		NA	NA	NA	NA	NA	NA	NA	NA	NA	NA	TGCGCCAGCAGCTTTCAGGCGGACAGGGGGCTCGGCTACACCTTC	36	NA	NA	NA	NA	NA	NA	NA	CASSFQADRGLGYTF	NA	:::::::::0:-2:14:20:-1:0:31:33:-8:45:::
BM12	31	8	0.0695652	TGTGCCAGCAGTGAAGTCCGTTACACCTTC	FFEEEEFEEFEEEEFEEEEFEEEEEFFFEF	TRBV6-1*00(372)		TRBJ1-2*00(163)	TRBC1*00(108)	427|443|464|0|16||80.0		31|40|68|21|30||45.0		NA	NA	NA	NA	NA	NA	NA	NA	NA	NA	TGTGCCAGCAGTGAAGTCCGTTACACCTTC	36	NA	NA	NA	NA	NA	NA	NA	CASSEVRYTF	NA	:::::::::0:-1:16:::::21:-11:30:::
BM12	32	8	0.0695652	TGTGCCAGCAGCCCGAGGGGGAGGGTAGGGACCACTGAAGCTTTCTTT	FFEEEEEEFEEEFFFEFFEFFEFFFEFEFEEEFEFEFEEFEEEEEEEE	TRBV7-9*00(321)	TRBD2*00(35),TRBD1*00(30)	TRBJ1-1*00(220)	TRBC1*00(55)	430|442|467|0|12||60.0	25|32|48|18|25||35.0;17|23|36|15|21||30.0	24|40|68|32|48||80.0		NA	NA	NA	NA	NA	NA	NA	NA	NA	NA	TGTGCCAGCAGCCCGAGGGGGAGGGTAGGGACCACTGAAGCTTTCTTT	36	NA	NA	NA	NA	NA	NA	NA	CASSPRGRVGTTEAFF	NA	:::::::::0:-5:12:18:-9:0:25:32:-4:48:::
BM12	35	7	0.0608696	TGTGCCAGCAGTTTTTCGGCGCGGAGTCCTAACTATGGCTACACCTTC	FEEEEEEEEEDEEEEEEEEEEEEEDEDEEE@EEEEEEEEEEEFEDEEE	TRBV12-3*00(175),TRBV12-4*00(175)	TRBD1*00(25)	TRBJ1-2*00(240)		430|444|467|0|14||70.0;430|444|467|0|14||70.0	21|26|36|17|22||25.0	20|40|68|28|48||100.0		NA	NA	NA	NA	NA	NA	NA	NA	NA	NA	TGTGCCAGCAGTTTTTCGGCGCGGAGTCCTAACTATGGCTACACCTTC	31	NA	NA	NA	NA	NA	NA	NA	CASSFSARSPNYGYTF	NA	:::::::::0:-3:14:17:-9:2:22:28:0:48:::
BM12	38	5	0.0434783	TGTGCCAGCAGCGGGGGCCCGCCTCGCTACACCTTC	EFEEFFEEEEEEFEFFFEFFFEFEEFFEEFEFFEEE	TRBV6-1*00(216),TRBV6-5*00(216),TRBV6-8*00(216)	TRBD1*00(30),TRBD2*00(30)	TRBJ1-2*00(195)		427|438|464|0|11||55.0;427|438|464|0|11||55.0;424|435|461|0|11||55.0	18|24|36|12|18||30.0;29|35|48|14|20||30.0	29|40|68|25|36||55.0		NA	NA	NA	NA	NA	NA	NA	NA	NA	NA	TGTGCCAGCAGCGGGGGCCCGCCTCGCTACACCTTC	36	NA	NA	NA	NA	NA	NA	NA	CASSGGPPRYTF	NA	:::::::::0:-6:11:12:-6:0:18:25:-9:36:::
BM12	40	4	0.0347826	TGTGCCAGCAGTTTTTCCCCGGACAATGAGCAGTTCTTC	FEFFEEFEFFEEEEEFEEEFEEEEFFFEEFEFEFEFEFF	TRBV12-3*00(263),TRBV12-4*00(263)	TRBD1*00(25),TRBD2*00(25)	TRBJ2-1*00(225)		430|444|467|0|14||70.0;430|444|467|0|14||70.0	9|14|36|17|22||25.0;13|18|48|17|22||25.0	25|42|70|22|39||85.0		NA	NA	NA	NA	NA	NA	NA	NA	NA	NA	TGTGCCAGCAGTTTTTCCCCGGACAATGAGCAGTTCTTC	36	NA	NA	NA	NA	NA	NA	NA	CASSFSPDNEQFF	NA	:::::::::0:-3:14:17:3:-10:22:22:-5:39:::
BM12	41	3	0.026087	TGTGCCAGCAGTCTCGGGGGTGGGTACAATCAGCCCCAGCATTTT	EEEEDEEEDAE@DEEEDEDEEEDEE:EDEEEEEDDEDEDBAECDE	TRBV12-3*00(159.3),TRBV12-4*00(159.3)	TRBD1*00(25)	TRBJ1-5*00(224.3)		430|442|467|0|12||60.0;430|442|467|0|12||60.0	18|23|36|15|20||25.0	23|42|70|26|45||95.0		NA	NA	NA	NA	NA	NA	NA	NA	NA	NA	TGTGCCAGCAGTCTCGGGGGTGGGTACAATCAGCCCCAGCATTTT	25	NA	NA	NA	NA	NA	NA	NA	CASSLGGGYNQPQHF	NA	:::::::::0:-5:12:15:-6:-1:20:26:-3:45:::
BM12	42	3	0.026087	TGCAGCGGCCTGGTCCTGGGGCGCTACACCTTC	C9E8@@>ECD@DE<DECEDBDCCEE;DA@EECC	TRBV29-1*00(205)	TRBD1*00(25)	TRBJ1-2*00(195)		421|428|455|0|7||35.0	19|24|36|17|22||25.0	29|40|68|22|33||55.0		NA	NA	NA	NA	NA	NA	NA	NA	NA	NA	TGCAGCGGCCTGGTCCTGGGGCGCTACACCTTC	23	NA	NA	NA	NA	NA	NA	NA	CSGLVLGRYTF	NA	:::::::::0:-7:7:17:-7:0:22:22:-9:33:::
BM12	44	2	0.0173913	TGTGCCAGCAGTGCAGAGGATACGCAGTATTTT	ECEDBE?EEEDEADDDEDECCAEDD?DEED?DE	TRBV2*00(180)		TRBJ2-3*00(199)		430|443|467|0|13||65.0		26|41|69|18|33||75.0		NA	NA	NA	NA	NA	NA	NA	NA	NA	NA	TGTGCCAGCAGTGCAGAGGATACGCAGTATTTT	30	NA	NA	NA	NA	NA	NA	NA	CASSAEDTQYF	NA	:::::::::0:-4:13:::::18:-6:33:::
BM12	45	2	0.0173913	TGTGCCAGCAGTTTAGTGGTGTCCCGCACAGATACGCAGTATTTT	EEEEEE@EEEDEEEEEEEEEDEAEDEEDEEEEEEEEEEEEEEEDE	TRBV28*00(170)	TRBD1*00(30)	TRBJ2-3*00(240)		427|442|464|0|15||75.0	6|12|36|19|25||30.0	21|41|69|25|45||100.0		NA	NA	NA	NA	NA	NA	NA	NA	NA	NA	TGTGCCAGCAGTTTAGTGGTGTCCCGCACAGATACGCAGTATTTT	31	NA	NA	NA	NA	NA	NA	NA	CASSLVVSRTDTQYF	NA	:::::::::0:-2:15:19:6:-12:25:25:-1:45:::
BM12	46	2	0.0173913	TGTGCCAGCAGTGAAGGGACAGGGCACACAGATACGCAGTATTTT	DAEEEEEEEEEEEEEEEEBEDEEEEECDEEEEEDEEEEEEDE@EE	TRBV6-1*00(175),TRBV6-5*00(155),TRBV6-6*00(155)	TRBD1*00(40)	TRBJ2-3*00(235)		427|443|464|0|16||80.0;427|439|464|0|12||60.0;427|439|464|0|12||60.0	13|21|36|16|24||40.0	22|41|69|26|45||95.0		NA	NA	NA	NA	NA	NA	NA	NA	NA	NA	TGTGCCAGCAGTGAAGGGACAGGGCACACAGATACGCAGTATTTT	31	NA	NA	NA	NA	NA	NA	NA	CASSEGTGHTDTQYF	NA	:::::::::0:-1:16:16:-1:-3:24:26:-2:45:::
BM12	50	1	0.00869565	TGTGCCATCAGTGAGCACGGCGGGGAGCTGTTTTTT	EEDDDEACEE<EBDEDBDEDAECEEECBEEEEEEEE	TRBV10-3*00(198)		TRBJ2-2*00(220)		427|442|464|0|15||75.0		27|43|71|20|36||80.0		NA	NA	NA	NA	NA	NA	NA	NA	NA	NA	TGTGCCATCAGTGAGCACGGCGGGGAGCTGTTTTTT	27	NA	NA	NA	NA	NA	NA	NA	CAISEHGGELFF	NA	:::::::::0:-2:15:::::20:-7:36:::
BM12	51	1	0.00869565	TGTGCCAGCAGTCTCGGGGACCCTGAAGCTTTCTTT	DE@DCCBCBCDDCA=9@BB>C6;EB>E;@CDCBCBE	TRBV12-3*00(215),TRBV12-4*00(215)	TRBD1*00(25),TRBD2*00(25)	TRBJ1-1*00(210)		430|442|467|0|12||60.0;430|442|467|0|12||60.0	12|17|36|16|21||25.0;16|21|48|16|21||25.0	26|40|68|22|36||70.0		NA	NA	NA	NA	NA	NA	NA	NA	NA	NA	TGTGCCAGCAGTCTCGGGGACCCTGAAGCTTTCTTT	21	NA	NA	NA	NA	NA	NA	NA	CASSLGDPEAFF	NA	:::::::::0:-5:12:16:0:-7:21:22:-6:36:::
BM12	52	1	0.00869565	TGTGCCACCAGCAGAGAAAGCGGGAGCTCCTACGAGCAGTACTTC	EDBDEE;EAEEEEEEEEDBEBEDECEECEEEEEEDEEEEEEEEED	TRBV15*00(179)		TRBJ2-7*00(175)		427|444|464|0|17||85.0		16|39|67|22|45||115.0		NA	NA	NA	NA	NA	NA	NA	NA	NA	NA	TGTGCCACCAGCAGAGAAAGCGGGAGCTCCTACGAGCAGTACTTC	26	NA	NA	NA	NA	NA	NA	NA	CATSRESGSSYEQYF	NA	:::::::::0:0:17:::::22:4:45:::
BM12	53	1	0.00869565	TGTGCCAGTAGTATGACAGGCAACACTGAAGCTTTCTTT	EEEDEDA?CEEEBA@AECBDED@DDDEDDE<DEE@?EEE	TRBV19*00(210)	TRBD1*00(30)	TRBJ1-1*00(230)		427|441|464|0|14||70.0	14|20|36|14|20||30.0	22|40|68|21|39||90.0		NA	NA	NA	NA	NA	NA	NA	NA	NA	NA	TGTGCCAGTAGTATGACAGGCAACACTGAAGCTTTCTTT	27	NA	NA	NA	NA	NA	NA	NA	CASSMTGNTEAFF	NA	:::::::::0:-3:14:14:-2:-4:20:21:-2:39:::
BM12	54	1	0.00869565	TGTGCCAGTAGTATAACAGTCAATCAGCCCCAGCATTTT	EDDCCCDDE@BBBCB@ECEDDD<CE9=DA=CD@<;BCEE	TRBV19*00(215)		TRBJ1-5*00(235)		427|442|464|0|15||75.0		23|42|70|20|39||95.0		NA	NA	NA	NA	NA	NA	NA	NA	NA	NA	TGTGCCAGTAGTATAACAGTCAATCAGCCCCAGCATTTT	24	NA	NA	NA	NA	NA	NA	NA	CASSITVNQPQHF	NA	:::::::::0:-2:15:::::20:-3:39:::
BM12	55	1	0.00869565	TGTGCCAGCACCCGGGACAGGGGGTCCGAGCAGTACTTC	EEEEDEDEEDEEEDEEEDEEDEEECECEEEEEEEDEEDE	TRBV2*00(190)	TRBD1*00(70)	TRBJ2-7*00(125),TRBJ1-1*00(110)		430|440|467|0|10||50.0	9|23|36|10|24||70.0	26|39|67|26|39||65.0;36|40|68|35|39|ST39C|4.0		NA	NA	NA	NA	NA	NA	NA	NA	NA	NA	TGTGCCAGCACCCGGGACAGGGGGTCCGAGCAGTACTTC	34	NA	NA	NA	NA	NA	NA	NA	CASTRDRGSEQYF	NA	:::::::::0:-7:10:10:3:-1:24:26:-6:39:::
BM12	56	1	0.00869565	TGTGCCAGCAGGTTGACGGCAACCTCCTACGAGCAGTACTTC	EEEEEEEEEEEEEEEEEEEFEEEEDEEEEEEEEFEEEEEEEE	TRBV2*00(180)		TRBJ2-7*00(155)		430|441|467|0|11||55.0		20|39|67|23|42||95.0		NA	NA	NA	NA	NA	NA	NA	NA	NA	NA	TGTGCCAGCAGGTTGACGGCAACCTCCTACGAGCAGTACTTC	35	NA	NA	NA	NA	NA	NA	NA	CASRLTATSYEQYF	NA	:::::::::0:-6:11:::::23:0:42:::
BM12	57	1	0.00869565	TGCAGTGCTCGACAGCCCAATCAGCCCCAGCATTTT	EDEDEEEEBEEDEBEAEEECCEECEDDEEDEEEEDE	TRBV20-1*00(235)	TRBD1*00(25)	TRBJ1-5*00(145)		421|430|455|0|9||45.0	14|19|36|10|15||25.0	23|42|70|17|36||95.0		NA	NA	NA	NA	NA	NA	NA	NA	NA	NA	TGCAGTGCTCGACAGCCCAATCAGCCCCAGCATTTT	32	NA	NA	NA	NA	NA	NA	NA	CSARQPNQPQHF	NA	:::::::::0:-5:9:10:-2:-5:15:17:-3:36:::
BM12	58	1	0.00869565	TGCAGTGTCCACGCTGGGACTGGGAGTTCACCCCTCCACTTT	EEEE=CDDDE;EE@DE>D<DEDECABED@@D@D@D;BDEEDC	TRBV20-1*00(160)	TRBD2*00(30),TRBD1*00(29)	TRBJ1-6*00(204)		421|428|455|0|7||35.0	16|22|48|15|21||30.0;12|21|36|15|24|SA17T|29.0	29|45|73|26|42||80.0		NA	NA	NA	NA	NA	NA	NA	NA	NA	NA	TGCAGTGTCCACGCTGGGACTGGGAGTTCACCCCTCCACTTT	26	NA	NA	NA	NA	NA	NA	NA	CSVHAGTGSSPLHF	NA	:::::::::0:-7:7:15:0:-10:21:26:-9:42:::
BM12	59	1	0.00869565	TGCAGTGCTAGTAGATACAATGAGCAGTTCTTC	EDDEEE@EEEDEEEEE?EEDEDBE@DCED:;DC	TRBV20-1*00(205)		TRBJ2-1*00(230)		421|432|455|0|11||55.0		24|42|70|15|33||90.0		NA	NA	NA	NA	NA	NA	NA	NA	NA	NA	TGCAGTGCTAGTAGATACAATGAGCAGTTCTTC	25	NA	NA	NA	NA	NA	NA	NA	CSASRYNEQFF	NA	:::::::::0:-3:11:::::15:-4:33:::
BM12	60	1	0.00869565	TGTGCCAGCAGTTTAGTACAGGTTAACACCATATATTTT	EEEADCDEEDEDEEEDEA@DEEBBD?EDE=EEEDCDEDD	TRBV28*00(215)	TRBD1*00(25)	TRBJ1-3*00(215)		427|442|464|0|15||75.0	15|20|36|17|22||25.0	27|42|70|24|39||75.0		NA	NA	NA	NA	NA	NA	NA	NA	NA	NA	TGTGCCAGCAGTTTAGTACAGGTTAACACCATATATTTT	28	NA	NA	NA	NA	NA	NA	NA	CASSLVQVNTIYF	NA	:::::::::0:-2:15:17:-3:-4:22:24:-7:39:::
BM12	63	1	0.00869565	TGTGCCAGCAGTGGGGGACAGGGGTCGGATACGCAGTATTTT	EEDEEDEC@DEEEEEEDEEEDEBDEAEEEBDEDEEEE@EEED	TRBV6-4*00(175),TRBV6-1*00(159)	TRBD1*00(50)	TRBJ2-3*00(215)		427|440|464|0|13||65.0;427|440|464|0|13||65.0	12|22|36|14|24||50.0	26|41|69|27|42||75.0		NA	NA	NA	NA	NA	NA	NA	NA	NA	NA	TGTGCCAGCAGTGGGGGACAGGGGTCGGATACGCAGTATTTT	31	NA	NA	NA	NA	NA	NA	NA	CASSGGQGSDTQYF	NA	:::::::::0:-4:13:14:0:-2:24:27:-6:42:::
BM12	64	1	0.00869565	TGTGCCAGCAGTGGGACTAGCGGGAGCACAGATACGCAGTATTTT	CEE>EEEDEEDEEE@BEEDEEEEEDDECEEEEEDEEEEDEEEEEE	TRBV6-4*00(160),TRBV6-1*00(144)	TRBD2*00(55)	TRBJ2-3*00(245)		427|440|464|0|13||65.0;427|440|464|0|13||65.0	17|28|48|13|24||55.0	20|41|69|24|45||105.0		NA	NA	NA	NA	NA	NA	NA	NA	NA	NA	TGTGCCAGCAGTGGGACTAGCGGGAGCACAGATACGCAGTATTTT	29	NA	NA	NA	NA	NA	NA	NA	CASSGTSGSTDTQYF	NA	:::::::::0:-4:13:13:-1:-4:24:24:0:45:::
BM12	65	1	0.00869565	TGTGCCAGCAGTACTGGGACAGGGAAGGAAAAACTGTTTTTT	BDBCE@EC@ECE@EBDDDAEECE=EECCC=DB@DE@EEEEAE	TRBV6-1*00(220),TRBV6-5*00(220),TRBV6-2*00(204),TRBV6-3*00(204),TRBV6-6*00(204)	TRBD1*00(45)	TRBJ1-4*00(205)		427|439|464|0|12||60.0;427|439|464|0|12||60.0;427|439|464|0|12||60.0;427|439|464|0|12||60.0;427|439|464|0|12||60.0	12|21|36|15|24||45.0	28|43|71|27|42||75.0		NA	NA	NA	NA	NA	NA	NA	NA	NA	NA	TGTGCCAGCAGTACTGGGACAGGGAAGGAAAAACTGTTTTTT	28	NA	NA	NA	NA	NA	NA	NA	CASSTGTGKEKLFF	NA	:::::::::0:-5:12:15:0:-3:24:27:-8:42:::
BM12	66	1	0.00869565	TGTGCCAGCAGCTTTCCTAGGGCACTTTGGTACAATGAGCAGTTCTTC	DEEE9EE7EEDEBEEEEEEEAEEDEEDEEFEEDEEDEFDDEE?;EEED	TRBV11-2*00(145),TRBV11-3*00(145),TRBV7-2*00(145),TRBV5-8*00(129),TRBV7-9*00(129)	TRBD2*00(25)	TRBJ2-1*00(230)		430|444|467|0|14||70.0;430|444|467|0|14||70.0;430|444|467|0|14||70.0;427|441|463|0|14||70.0;430|444|467|0|14||70.0	28|33|48|18|23||25.0	24|42|70|30|48||90.0		NA	NA	NA	NA	NA	NA	NA	NA	NA	NA	TGTGCCAGCAGCTTTCCTAGGGCACTTTGGTACAATGAGCAGTTCTTC	22	NA	NA	NA	NA	NA	NA	NA	CASSFPRALWYNEQFF	NA	:::::::::0:-3:14:18:-12:1:23:30:-4:48:::
BM12	67	1	0.00869565	TGTGCCAGCAGCTTAACTCGAGGGAGTAGTGGCACTGAAGCTTTCTTT	EEEEEEEEEEEEEEECEEDEEEEEEEEEEEEEEEEEEEEEEEEEEEEE	TRBV7-3*00(180)	TRBD2*00(25)	TRBJ1-1*00(220)		430|447|467|0|17||85.0	25|30|48|21|26||25.0	24|40|68|32|48||80.0		NA	NA	NA	NA	NA	NA	NA	NA	NA	NA	TGTGCCAGCAGCTTAACTCGAGGGAGTAGTGGCACTGAAGCTTTCTTT	34	NA	NA	NA	NA	NA	NA	NA	CASSLTRGSSGTEAFF	NA	:::::::::0:0:17:21:-9:-2:26:32:-4:48:::
BM12	69	1	0.00869565	TGTGCCAGCAGCTTCCAGGGGTACACTGAAGCTTTCTTT	D@>D>B8AC;<BAB9E>C@=ED@=>7D<>B@<B;???CE	TRBV9*00(200)	TRBD1*00(30)	TRBJ1-1*00(225)		427|439|463|0|12||60.0	16|22|36|15|21||30.0	23|40|68|22|39||85.0		NA	NA	NA	NA	NA	NA	NA	NA	NA	NA	TGTGCCAGCAGCTTCCAGGGGTACACTGAAGCTTTCTTT	22	NA	NA	NA	NA	NA	NA	NA	CASSFQGYTEAFF	NA	:::::::::0:-4:12:15:-4:-2:21:22:-3:39:::
BM12	70	1	0.00869565	TGTGCCAGCAGCGTAGTGGTGGGATCCAACTATGGCTACACCTTC	DED9EDEDDE=BDEEDCEE;EEEDBDEEEDDDEBCE@CBC=CEB@	TRBV9*00(190)		TRBJ1-2*00(230)		427|443|463|0|16||80.0		22|40|68|27|45||90.0		NA	NA	NA	NA	NA	NA	NA	NA	NA	NA	TGTGCCAGCAGCGTAGTGGTGGGATCCAACTATGGCTACACCTTC	24	NA	NA	NA	NA	NA	NA	NA	CASSVVVGSNYGYTF	NA	:::::::::0:0:16:::::27:-2:45:::
BM13	55	19	0.175926	TGTGCTAGTAGGCTGGCGAACACTGAAGCTTTCTTT	FFFFFFFFEFFFFFFFFFFFFFFFFFFFFFFFFFFF	TRBV12-5*00(174)		TRBJ1-1*00(235)		430|439|467|0|9||45.0		21|40|68|17|36||95.0		NA	NA	NA	NA	NA	NA	NA	NA	NA	NA	TGTGCTAGTAGGCTGGCGAACACTGAAGCTTTCTTT	36	NA	NA	NA	NA	NA	NA	NA	CASRLANTEAFF	NA	:::::::::0:-8:9:::::17:-1:36:::
BM13	99	14	0.12963	TGTGCCAGCAGTAGACTAGCGGGAGCCAACGAGCAGTACTTC	EEEEEEEEEEEEEEEEEEEEEEEDAEFEEEEEEEEEEEEEEE	TRBV6-1*00(170.6),TRBV6-5*00(170.6),TRBV6-6*00(169)	TRBD2*00(60)	TRBJ2-7*00(194.5)		427|439|464|0|12||60.0;427|439|464|0|12||60.0;427|439|464|0|12||60.0	18|30|48|13|25||60.0	25|39|67|28|42||70.0		NA	NA	NA	NA	NA	NA	NA	NA	NA	NA	TGTGCCAGCAGTAGACTAGCGGGAGCCAACGAGCAGTACTTC	32	NA	NA	NA	NA	NA	NA	NA	CASSRLAGANEQYF	NA	:::::::::0:-5:12:13:-2:-2:25:28:-5:42:::
BM13	100	14	0.12963	TGTGCCAGCAGCTACGGATCCGGACGTGGCTACACCTTC	EEEEEFFFFEFFEEEFFEEFFFFEEFEFFFEEFEFFFFF	TRBV6-1*00(232),TRBV6-9*00(232),TRBV6-6*00(220),TRBV6-5*00(204)		TRBJ1-2*00(205)		427|438|464|0|11||55.0;427|438|464|0|11||55.0;427|442|464|0|15|ST438C|59.0;427|442|464|0|15|ST438C|59.0		27|40|68|26|39||65.0		NA	NA	NA	NA	NA	NA	NA	NA	NA	NA	TGTGCCAGCAGCTACGGATCCGGACGTGGCTACACCTTC	36	NA	NA	NA	NA	NA	NA	NA	CASSYGSGRGYTF	NA	:::::::::0:-6:11:::::26:-7:39:::
BM13	108	13	0.12037	TGTGCCATCAAGCGGGAAAACTCCTACGAGCAGTACTTC	FFFFFFFFFFFFFFFFFFFFFFFFFEFFFFFFFEFFFFF	TRBV28*00(239)	TRBD2*00(35)	TRBJ2-7*00(203)		427|434|464|0|7||35.0	22|29|48|10|17||35.0	20|39|67|20|39||95.0		NA	NA	NA	NA	NA	NA	NA	NA	NA	NA	TGTGCCATCAAGCGGGAAAACTCCTACGAGCAGTACTTC	36	NA	NA	NA	NA	NA	NA	NA	CAIKRENSYEQYF	NA	:::::::::0:-10:7:10:-6:-3:17:20:0:39:::
BM13	109	13	0.12037	TGTGCCAGCAGCCCGTACCATGAGCAGTTCTTC	FFFEEEEEFFEFFFEEEEEEFEEEFFFEEEEEE	TRBV7-2*00(442)		TRBJ2-1*00(214)		430|442|467|0|12||60.0		24|42|70|15|33|SA27C|74.0		NA	NA	NA	NA	NA	NA	NA	NA	NA	NA	TGTGCCAGCAGCCCGTACCATGAGCAGTTCTTC	36	NA	NA	NA	NA	NA	NA	NA	CASSPYHEQFF	NA	:::::::::0:-5:12:::::15:-4:33:::
BM13	133	11	0.101852	TGTGCCAGCAGGCCCAGGGGGCACGATACGCAGTATTTT	FEEEEEFEEFFFEEFFFFFFFFFFFEEEEEEFEFEFFFF	TRBV28*00(259)	TRBD1*00(40)	TRBJ2-3*00(215)		427|438|464|0|11||55.0	16|24|36|14|22||40.0	26|41|69|24|39||75.0		NA	NA	NA	NA	NA	NA	NA	NA	NA	NA	TGTGCCAGCAGGCCCAGGGGGCACGATACGCAGTATTTT	36	NA	NA	NA	NA	NA	NA	NA	CASRPRGHDTQYF	NA	:::::::::0:-6:11:14:-4:0:22:24:-6:39:::
BM13	165	6	0.0555556	TGTGCCAGCAGTTATGGGGGGCTTGAAGCTTTCTTT	EEEEDEEEEDEEEEEEEEEEEEEEEEEEEEEEEEEE	TRBV12-3*00(202.3),TRBV12-4*00(202.3)	TRBD1*00(30)	TRBJ1-1*00(162.8)		430|443|467|0|13||65.0;430|443|467|0|13||65.0	18|24|36|16|22||30.0	27|40|68|23|36||65.0		NA	NA	NA	NA	NA	NA	NA	NA	NA	NA	TGTGCCAGCAGTTATGGGGGGCTTGAAGCTTTCTTT	35	NA	NA	NA	NA	NA	NA	NA	CASSYGGLEAFF	NA	:::::::::0:-4:13:16:-6:0:22:23:-7:36:::
BM13	176	2	0.0185185	TGTGCCAGCAGTCCATTAGCGGGAGAGCGAATCGGGGAGCTGTTTTTT	DEEDAEEBEEDECECCDCCCEEEEEEDEEEEEBDDDECCDEEEEEDEE	TRBV27*00(155)	TRBD2*00(45)	TRBJ2-2*00(212)		427|439|464|0|12||60.0	21|30|48|16|25||45.0	27|43|71|32|48||80.0		NA	NA	NA	NA	NA	NA	NA	NA	NA	NA	TGTGCCAGCAGTCCATTAGCGGGAGAGCGAATCGGGGAGCTGTTTTTT	32	NA	NA	NA	NA	NA	NA	NA	CASSPLAGERIGELFF	NA	:::::::::0:-5:12:16:-5:-2:25:32:-7:48:::
BM13	180	1	0.00925926	TGTGCCATCAGTGAAGAGGGTCGGCAGTTGGAGACCCAGTACTTC	DEDEEEDDECEEEDED9ADD9CEEECE<EEE@EEEEBCDCEEEEE	TRBV10-3*00(246)	TRBD2*00(25)	TRBJ2-5*00(94)		427|441|464|0|14||70.0	27|32|48|15|20||25.0	25|40|68|30|45||75.0		NA	NA	NA	NA	NA	NA	NA	NA	NA	NA	TGTGCCATCAGTGAAGAGGGTCGGCAGTTGGAGACCCAGTACTTC	24	NA	NA	NA	NA	NA	NA	NA	CAISEEGRQLETQYF	NA	:::::::::0:-3:14:15:-11:0:20:30:-5:45:::
BM13	181	1	0.00925926	TGTGCCATCAGTGATAGCGGGAGGGCCCACGAGCAGTACTTC	EDEDAE<ADEEEA;ED@DCCBEB;BC=E?@DCAE:ADDDBDE	TRBV10-3*00(195)	TRBD2*00(70)	TRBJ2-7*00(210)		427|441|464|0|14||70.0	21|35|48|14|28||70.0	25|39|67|28|42||70.0		NA	NA	NA	NA	NA	NA	NA	NA	NA	NA	TGTGCCATCAGTGATAGCGGGAGGGCCCACGAGCAGTACTTC	25	NA	NA	NA	NA	NA	NA	NA	CAISDSGRAHEQYF	NA	:::::::::0:-3:14:14:-5:3:28:28:-5:42:::
BM13	182	1	0.00925926	TGTGCCAGCAGTAGGGGGATTTCTGGAAACACCATATATTTT	EEED@EECA7EEEEBDEACEEEEE?CEEEEDDEEEDE?CEEE	TRBV12-3*00(185),TRBV12-4*00(185)	TRBD1*00(30)	TRBJ1-3*00(245)		430|442|467|0|12||60.0;430|442|467|0|12||60.0	17|23|36|12|18||30.0	21|42|70|21|42||105.0		NA	NA	NA	NA	NA	NA	NA	NA	NA	NA	TGTGCCAGCAGTAGGGGGATTTCTGGAAACACCATATATTTT	22	NA	NA	NA	NA	NA	NA	NA	CASSRGISGNTIYF	NA	:::::::::0:-5:12:12:-5:-1:18:21:-1:42:::
BM13	184	1	0.00925926	TGTGCCAGTAGTATCGAACACACAGTAAGGAACACTGAAGCTTTCTTT	EEE=EDCEBEDEEDEEEDEEECEDEDEEEEEEECEBCEE;DEEEEEEE	TRBV19*00(165)		TRBJ1-1*00(235)		427|441|464|0|14||70.0		21|40|68|29|48||95.0		NA	NA	NA	NA	NA	NA	NA	NA	NA	NA	TGTGCCAGTAGTATCGAACACACAGTAAGGAACACTGAAGCTTTCTTT	26	NA	NA	NA	NA	NA	NA	NA	CASSIEHTVRNTEAFF	NA	:::::::::0:-3:14:::::29:-1:48:::
BM13	185	1	0.00925926	TGTGCCAGCAATAGCGGGGTTTGGGATGAGCAGTTCTTC	EEEE@EEEEEBEBE:EEAECDEEEDEDEEEEEEEEEEED	TRBV19*00(160)	TRBD2*00(35)	TRBJ2-1*00(210)		427|435|464|0|8||40.0	21|28|48|11|18||35.0	28|42|70|25|39||70.0		NA	NA	NA	NA	NA	NA	NA	NA	NA	NA	TGTGCCAGCAATAGCGGGGTTTGGGATGAGCAGTTCTTC	25	NA	NA	NA	NA	NA	NA	NA	CASNSGVWDEQFF	NA	:::::::::0:-9:8:11:-5:-4:18:25:-8:39:::
BM13	186	1	0.00925926	TGTGCCAGCAGTGACGGTATTCAGCCCCAGCATTTT	E@DEEACDEEEEED?EEED?EDDEEEEDEDEDEEDE	TRBV2*00(225)		TRBJ1-5*00(220)		430|444|467|0|14||70.0		26|42|70|20|36||80.0		NA	NA	NA	NA	NA	NA	NA	NA	NA	NA	TGTGCCAGCAGTGACGGTATTCAGCCCCAGCATTTT	30	NA	NA	NA	NA	NA	NA	NA	CASSDGIQPQHF	NA	:::::::::0:-3:14:::::20:-6:36:::
BM13	187	1	0.00925926	TGTGCCAGCAGCTACTCCGAAGATACGCAGTATTTT	DDE9@EDBBBDED@EDEDEDEED@EEDEEAECEDDE	TRBV2*00(195)		TRBJ2-3*00(220)		430|441|467|0|11||55.0		25|41|69|20|36||80.0		NA	NA	NA	NA	NA	NA	NA	NA	NA	NA	TGTGCCAGCAGCTACTCCGAAGATACGCAGTATTTT	24	NA	NA	NA	NA	NA	NA	NA	CASSYSEDTQYF	NA	:::::::::0:-6:11:::::20:-5:36:::
BM13	188	1	0.00925926	TGTGCCAGCAGTTTTAGGGCACCTGGACAAACTGAAGCTTTCTTT	AEFDE>EEEEEEEDED?FEECDBDC?ECEDECDDEE>EEEE>DBE	TRBV27*00(226),TRBV28*00(210)	TRBD1*00(25),TRBD2*00(25)	TRBJ1-1*00(130)		427|441|464|0|14||70.0;427|441|464|0|14||70.0	13|18|36|24|29||25.0;28|33|48|15|20||25.0	25|40|68|30|45||75.0		NA	NA	NA	NA	NA	NA	NA	NA	NA	NA	TGTGCCAGCAGTTTTAGGGCACCTGGACAAACTGAAGCTTTCTTT	29	NA	NA	NA	NA	NA	NA	NA	CASSFRAPGQTEAFF	NA	:::::::::0:-3:14:24:-1:-6:29:30:-5:45:::
BM13	189	1	0.00925926	TGTGCCAGCAGTTTGCTAGCGGGAGGTGCACATGAGCAGTTCTTC	E>8EEEDAEEECEEEEECDDEDCC;EEEEEEEECEEEEEEEEEEE	TRBV27*00(263)	TRBD2*00(55)	TRBJ2-1*00(120)		427|441|464|0|14||70.0	20|31|48|15|26||55.0	28|42|70|31|45||70.0		NA	NA	NA	NA	NA	NA	NA	NA	NA	NA	TGTGCCAGCAGTTTGCTAGCGGGAGGTGCACATGAGCAGTTCTTC	23	NA	NA	NA	NA	NA	NA	NA	CASSLLAGGAHEQFF	NA	:::::::::0:-3:14:15:-4:-1:26:31:-8:45:::
BM13	190	1	0.00925926	TGTGCCAGGGACGAACACCGGGGAGCTGTTTTT	EEEEEEEEEEEEEEEEEEEEEEEEEAEEEEEEE	TRBV27*00(233)		TRBJ2-2*00(229)		427|435|464|0|8||40.0		20|43|71|11|33|DT42|89.0		NA	NA	NA	NA	NA	NA	NA	NA	NA	NA	TGTGCCAGGGACGAACACCGGGGAGCTGTTTTT	32	NA	NA	NA	NA	NA	NA	NA	CARDEHRGAVF	NA	:::::::::0:-9:8:::::11:0:33:::
BM13	191	1	0.00925926	TGTGCCAGCAGCCCTCCGGAGGGCGCGGAGTTCTTC	EECCAEEEEDEBED@EDEDDEEEDEEEEEEEEEEED	TRBV28*00(259)	TRBD2*00(35),TRBD1*00(30)	TRBJ2-1*00(180)		427|438|464|0|11||55.0	26|33|48|17|24||35.0;20|26|36|20|26||30.0	34|42|70|28|36||40.0		NA	NA	NA	NA	NA	NA	NA	NA	NA	NA	TGTGCCAGCAGCCCTCCGGAGGGCGCGGAGTTCTTC	31	NA	NA	NA	NA	NA	NA	NA	CASSPPEGAEFF	NA	:::::::::0:-6:11:17:-10:1:24:28:-14:36:::
BM13	194	1	0.00925926	TGTGCCAGCAGGCCGACTAGCGGGAGTATTAGGGGGGAGCTGTTTTTT	EEEE>;CE<:E<CEC<E<AE=EEEBEEDEB>EEDDEEEDEEEEDEEEE	TRBV6-1*00(150),TRBV6-5*00(150),TRBV6-6*00(150),TRBV6-2*00(134),TRBV6-4*00(134)	TRBD2*00(60)	TRBJ2-2*00(215)		427|438|464|0|11||55.0;427|438|464|0|11||55.0;427|438|464|0|11||55.0;427|438|464|0|11||55.0;427|438|464|0|11||55.0	18|30|48|14|26||60.0	28|43|71|33|48||75.0		NA	NA	NA	NA	NA	NA	NA	NA	NA	NA	TGTGCCAGCAGGCCGACTAGCGGGAGTATTAGGGGGGAGCTGTTTTTT	25	NA	NA	NA	NA	NA	NA	NA	CASRPTSGSIRGELFF	NA	:::::::::0:-6:11:14:-2:-2:26:33:-8:48:::
BM13	196	1	0.00925926	TGTGCCAGCGATCAGGGTACCTACGAGCAGTACTTC	DD=DCEC;DD>;EDD>?<=BA>8EB@EDB7?6E?;A	TRBV6-1*00(200),TRBV6-5*00(200),TRBV6-6*00(200),TRBV6-2*00(184),TRBV6-3*00(184)	TRBD1*00(25)	TRBJ2-7*00(225)		427|436|464|0|9||45.0;427|436|464|0|9||45.0;427|436|464|0|9||45.0;427|436|464|0|9||45.0;427|436|464|0|9||45.0	16|21|36|12|17||25.0	22|39|67|19|36||85.0		NA	NA	NA	NA	NA	NA	NA	NA	NA	NA	TGTGCCAGCGATCAGGGTACCTACGAGCAGTACTTC	21	NA	NA	NA	NA	NA	NA	NA	CASDQGTYEQYF	NA	:::::::::0:-8:9:12:-4:-3:17:19:-2:36:::
BM13	197	1	0.00925926	TGTGCCAGCAGCCCGTACCACGAGCAGTTCTTC	EEEEEEEEEEEEEEEEEEEEEEEEEEFEEEEEE	TRBV7-2*00(442)		TRBJ2-1*00(200)		430|442|467|0|12||60.0		30|42|70|21|33||60.0		NA	NA	NA	NA	NA	NA	NA	NA	NA	NA	TGTGCCAGCAGCCCGTACCACGAGCAGTTCTTC	36	NA	NA	NA	NA	NA	NA	NA	CASSPYHEQFF	NA	:::::::::0:-5:12:::::21:-10:33:::
BM13	198	1	0.00925926	TGTGCCAGCAGCCGGACTAGCGGTTACAATGAGCAGTTCTTC	D=CB:DEDEBE>EEECADDD;BECEDDDDEBD@DE@EDCEDE	TRBV11-2*00(165),TRBV7-2*00(165),TRBV11-3*00(149),TRBV5-8*00(149),TRBV7-8*00(149)	TRBD2*00(50)	TRBJ2-1*00(230)		430|442|467|0|12||60.0;430|442|467|0|12||60.0;430|442|467|0|12||60.0;427|439|463|0|12||60.0;430|442|467|0|12||60.0	17|27|48|13|23||50.0	24|42|70|24|42||90.0		NA	NA	NA	NA	NA	NA	NA	NA	NA	NA	TGTGCCAGCAGCCGGACTAGCGGTTACAATGAGCAGTTCTTC	25	NA	NA	NA	NA	NA	NA	NA	CASSRTSGYNEQFF	NA	:::::::::0:-5:12:13:-1:-5:23:24:-4:42:::
BM13	199	1	0.00925926	TGTGCCAGCAGCTTAAATGCAGGGAGAGAGACCCAGTACTTC	EEEE;ECDEE=EEEDD;EDDEEDBEDEDEEDCEBEEEBDEEC	TRBV7-3*00(214)	TRBD1*00(25),TRBD2*00(25)	TRBJ2-5*00(220)		430|446|467|0|16||80.0	16|21|36|19|24||25.0;25|30|48|21|26||25.0	24|40|68|26|42||80.0		NA	NA	NA	NA	NA	NA	NA	NA	NA	NA	TGTGCCAGCAGCTTAAATGCAGGGAGAGAGACCCAGTACTTC	26	NA	NA	NA	NA	NA	NA	NA	CASSLNAGRETQYF	NA	:::::::::0:-1:16:19:-4:-3:24:26:-4:42:::
BM14	3	34	0.34	TGCGCCAGCAGCTTGGAAATCGGAGGGGCCCAGAGGGAGACCCAGTACTTC	FEFFFFFFFFFEEFFFFFEFFFFEEFEFEFEFFFFEEFFEFEFFEFEFEEF	TRBV5-1*00(412)	TRBD2*00(30)	TRBJ2-5*00(214.5)		427|443|463|0|16||80.0	26|32|48|21|27||30.0	25|40|68|36|51||75.0		NA	NA	NA	NA	NA	NA	NA	NA	NA	NA	TGCGCCAGCAGCTTGGAAATCGGAGGGGCCCAGAGGGAGACCCAGTACTTC	36	NA	NA	NA	NA	NA	NA	NA	CASSLEIGGAQRETQYF	NA	:::::::::0:0:16:21:-10:0:27:36:-5:51:::
BM14	4	29	0.29	TGTGCCAGCAGTGAATACGGGACGGATCAGCCCCAGCATTTT	FFFFFFFFFFFFFFFEFFFFFEFFFFEFFFFFFFFFFFFFFF	TRBV2*00(334)	TRBD1*00(30),TRBD2*00(30)	TRBJ1-5*00(223.9)		430|445|467|0|15||75.0	11|17|36|17|23||30.0;15|21|48|17|23||30.0	25|42|70|25|42||85.0		NA	NA	NA	NA	NA	NA	NA	NA	NA	NA	TGTGCCAGCAGTGAATACGGGACGGATCAGCCCCAGCATTTT	36	NA	NA	NA	NA	NA	NA	NA	CASSEYGTDQPQHF	NA	:::::::::0:-2:15:17:1:-7:23:25:-5:42:::
BM14	5	12	0.12	TGTGCCAGCAGTAGACTAGCGGGAGCCAACGAGCAGTACTTC	EEEEEEEFEEEDEEEDEEEEEDEEEEEEEEEEFEEEEEEEEE	TRBV6-1*00(182.4),TRBV6-5*00(182.4),TRBV6-6*00(180.4)	TRBD2*00(60)	TRBJ2-7*00(184.1)		427|439|464|0|12||60.0;427|439|464|0|12||60.0;427|439|464|0|12||60.0	18|30|48|13|25||60.0	25|39|67|28|42||70.0		NA	NA	NA	NA	NA	NA	NA	NA	NA	NA	TGTGCCAGCAGTAGACTAGCGGGAGCCAACGAGCAGTACTTC	35	NA	NA	NA	NA	NA	NA	NA	CASSRLAGANEQYF	NA	:::::::::0:-5:12:13:-2:-2:25:28:-5:42:::
BM14	8	1	0.01	TGTGCCATCAGTGAAGAGGGTCGGCAGTTGGAGACCCAGTACTTC	DEEDDEABCEEEEEEEEEEEDEEEEEE9EDEEEDEEEEEEDEEEE	TRBV10-3*00(205)	TRBD2*00(25)	TRBJ2-5*00(215)		427|441|464|0|14||70.0	27|32|48|15|20||25.0	25|40|68|30|45||75.0		NA	NA	NA	NA	NA	NA	NA	NA	NA	NA	TGTGCCATCAGTGAAGAGGGTCGGCAGTTGGAGACCCAGTACTTC	24	NA	NA	NA	NA	NA	NA	NA	CAISEEGRQLETQYF	NA	:::::::::0:-3:14:15:-11:0:20:30:-5:45:::
BM14	9	1	0.01	TGTGCCAGCAGTTTAGGATCAGGGGGCAGGGCCGGGGAGCTGTTTTTT	EEDDEEE=CBECDEEE?6DEEECEEDA9EEEEDE:EECE@=@B@E?E@	TRBV12-3*00(273),TRBV12-4*00(273)	TRBD1*00(40)	TRBJ2-2*00(105)		430|446|467|0|16||80.0;430|446|467|0|16||80.0	16|24|36|19|27||40.0	26|43|71|31|48||85.0		NA	NA	NA	NA	NA	NA	NA	NA	NA	NA	TGTGCCAGCAGTTTAGGATCAGGGGGCAGGGCCGGGGAGCTGTTTTTT	21	NA	NA	NA	NA	NA	NA	NA	CASSLGSGGRAGELFF	NA	:::::::::0:-1:16:19:-4:0:27:31:-6:48:::
BM14	10	1	0.01	TGTGCCAGCAGTTTTAACACAGATACGCAGTATTTT	B;BCDC;=D?CA@DDC=>CB>?BBBAB:D@EAD@BE	TRBV12-3*00(210),TRBV12-4*00(210)		TRBJ2-3*00(235)		430|444|467|0|14||70.0;430|444|467|0|14||70.0		22|41|69|17|36||95.0		NA	NA	NA	NA	NA	NA	NA	NA	NA	NA	TGTGCCAGCAGTTTTAACACAGATACGCAGTATTTT	25	NA	NA	NA	NA	NA	NA	NA	CASSFNTDTQYF	NA	:::::::::0:-3:14:::::17:-2:36:::
BM14	12	1	0.01	TGTGCCAGTAGTACCCCCGGGACAGGGGCGGTTGAAGCTTTCTTT	EDEDEEEEEDFEDEEEEEEEEEEEEFEEEEE@EEEEFEEDEEEDE	TRBV19*00(329)	TRBD1*00(65)	TRBJ1-1*00(125)		427|440|464|0|13||65.0	9|22|36|15|28||65.0	27|40|68|32|45||65.0		NA	NA	NA	NA	NA	NA	NA	NA	NA	NA	TGTGCCAGTAGTACCCCCGGGACAGGGGCGGTTGAAGCTTTCTTT	31	NA	NA	NA	NA	NA	NA	NA	CASSTPGTGAVEAFF	NA	:::::::::0:-4:13:15:3:-2:28:32:-7:45:::
BM14	13	1	0.01	TGTGCCAGCAGTGTGCTTTCTCGCGAGCAGTACTTC	EEBA?:@CDEECDE=CDEBCDEE?EE>EEBEBEBEE	TRBV2*00(220)		TRBJ2-7*00(205)		430|443|467|0|13||65.0		26|39|67|23|36||65.0		NA	NA	NA	NA	NA	NA	NA	NA	NA	NA	TGTGCCAGCAGTGTGCTTTCTCGCGAGCAGTACTTC	25	NA	NA	NA	NA	NA	NA	NA	CASSVLSREQYF	NA	:::::::::0:-4:13:::::23:-6:36:::
BM14	14	1	0.01	TGTGCCAGTGCCTGGGGACAGGTTTACGAGCAGTACTTC	EEDDDEEEEEECCEEEE6BEEEEDEEEEDEEEEEEEDEE	TRBV2*00(180)	TRBD1*00(40)	TRBJ2-7*00(215)		430|438|467|0|8||40.0	12|20|36|14|22||40.0	24|39|67|24|39||75.0		NA	NA	NA	NA	NA	NA	NA	NA	NA	NA	TGTGCCAGTGCCTGGGGACAGGTTTACGAGCAGTACTTC	21	NA	NA	NA	NA	NA	NA	NA	CASAWGQVYEQYF	NA	:::::::::0:-9:8:14:0:-4:22:24:-4:39:::
BM14	15	1	0.01	TGCAGTGTTAAGCAGGGCAATGAGCAGTTCTTC	EECEEE@ECDEED@EEEEEAEEEEDEEDEEDE;	TRBV20-1*00(185)	TRBD1*00(25)	TRBJ2-1*00(220)		421|428|455|0|7||35.0	16|21|36|12|17||25.0	26|42|70|17|33||80.0		NA	NA	NA	NA	NA	NA	NA	NA	NA	NA	TGCAGTGTTAAGCAGGGCAATGAGCAGTTCTTC	26	NA	NA	NA	NA	NA	NA	NA	CSVKQGNEQFF	NA	:::::::::0:-7:7:12:-4:-3:17:17:-6:33:::
BM14	16	1	0.01	TGCAGTGGCGACAGGGGCTCAGTAGGTTCCTACGAGCAGTACTTC	EEEEEEEEEEEEEFEFEEEEEEEEEEEEFEEEEEEFEEEEDEEFE	TRBV20-1*00(373)	TRBD1*00(40)	TRBJ2-7*00(150)		421|428|455|0|7||35.0	14|22|36|9|17||40.0	21|39|67|27|45||90.0		NA	NA	NA	NA	NA	NA	NA	NA	NA	NA	TGCAGTGGCGACAGGGGCTCAGTAGGTTCCTACGAGCAGTACTTC	35	NA	NA	NA	NA	NA	NA	NA	CSGDRGSVGSYEQYF	NA	:::::::::0:-7:7:9:-2:-2:17:27:-1:45:::
BM14	17	1	0.01	TGTGCCAGCAGACCCAGGCAGGGCGGTAATTCACCCCTCCACTTT	EDA?ECE=EEE8EEEEEEEEEEEEEEED?ECE@EEEEDEEECEEC	TRBV27*00(165)	TRBD1*00(25),TRBD2*00(25)	TRBJ1-6*00(235)		427|438|464|0|11||55.0	16|21|36|18|23||25.0;28|33|48|19|24||25.0	26|45|73|26|45||95.0		NA	NA	NA	NA	NA	NA	NA	NA	NA	NA	TGTGCCAGCAGACCCAGGCAGGGCGGTAATTCACCCCTCCACTTT	23	NA	NA	NA	NA	NA	NA	NA	CASRPRQGGNSPLHF	NA	:::::::::0:-6:11:18:-4:-3:23:26:-6:45:::
BM14	18	1	0.01	TGTGCCAGCAGCCTCGACAGGGGGACTGAAGCTTTCTTT	DA9DBAECEDE>AEEEDECEBEEE>DDCB>DDECADEEE	TRBV28*00(259)	TRBD1*00(45)	TRBJ1-1*00(215)		427|438|464|0|11||55.0	14|23|36|15|24||45.0	25|40|68|24|39||75.0		NA	NA	NA	NA	NA	NA	NA	NA	NA	NA	TGTGCCAGCAGCCTCGACAGGGGGACTGAAGCTTTCTTT	24	NA	NA	NA	NA	NA	NA	NA	CASSLDRGTEAFF	NA	:::::::::0:-6:11:15:-2:-1:24:24:-5:39:::
BM14	19	1	0.01	TGTGCCAGCAGTTTATGGGGGACAGGGAGGAATAATCAGCCCCAGCATTTT	CEEEDEEB9DE?EECEEDECDDEEEEEDCECEEA@@E>EBDEE:CE:EEDE	TRBV28*00(165)	TRBD1*00(45)	TRBJ1-5*00(230)		427|444|464|0|17||85.0	12|21|36|18|27||45.0	24|42|70|33|51||90.0		NA	NA	NA	NA	NA	NA	NA	NA	NA	NA	TGTGCCAGCAGTTTATGGGGGACAGGGAGGAATAATCAGCCCCAGCATTTT	24	NA	NA	NA	NA	NA	NA	NA	CASSLWGTGRNNQPQHF	NA	:::::::::0:0:17:18:0:-3:27:33:-4:51:::
BM14	21	1	0.01	TGTGCCAGCAGTGAGGCAGGGGGCATTGAAAAACTGTTTTTT	EEECEDEEEDEDEDEEEDEEEEEEDEEEEEEDEDEEDEEDDE	TRBV6-1*00(230),TRBV6-5*00(220),TRBV6-2*00(204),TRBV6-3*00(204)	TRBD1*00(40)	TRBJ1-4*00(210)		427|441|464|0|14||70.0;427|439|464|0|12||60.0;427|439|464|0|12||60.0;427|439|464|0|12||60.0	16|24|36|16|24||40.0	27|43|71|26|42||80.0		NA	NA	NA	NA	NA	NA	NA	NA	NA	NA	TGTGCCAGCAGTGAGGCAGGGGGCATTGAAAAACTGTTTTTT	34	NA	NA	NA	NA	NA	NA	NA	CASSEAGGIEKLFF	NA	:::::::::0:-3:14:16:-4:0:24:26:-7:42:::
BM14	22	1	0.01	TGTGCCAGCAGTGAAATCGGCAGGGGAACCGGGGAGCTGTTTTTT	DEEEEEEEDEEEDEEDDDEBCEEEEEEEDEEEEEDDDEE7EEEEE	TRBV6-1*00(252),TRBV6-5*00(237),TRBV6-8*00(237),TRBV6-6*00(221)	TRBD1*00(30)	TRBJ2-2*00(230)		427|442|464|0|15||75.0;427|439|464|0|12||60.0;424|436|461|0|12||60.0;427|439|464|0|12||60.0	16|22|36|20|26||30.0	25|43|71|27|45||90.0		NA	NA	NA	NA	NA	NA	NA	NA	NA	NA	TGTGCCAGCAGTGAAATCGGCAGGGGAACCGGGGAGCTGTTTTTT	22	NA	NA	NA	NA	NA	NA	NA	CASSEIGRGTGELFF	NA	:::::::::0:-2:15:20:-4:-2:26:27:-5:45:::
BM14	23	1	0.01	TGTGCCAGCAGTGAAGGGACAACCCCAAATCAGCCCCAGCATTTT	EFFEEFEEEFEEEFEEEEEFEEEEEFEEEEEEEEFEEEEEEEEEF	TRBV6-2*00(237),TRBV6-3*00(237),TRBV6-1*00(225)	TRBD1*00(30)	TRBJ1-5*00(230)		427|439|464|0|12||60.0;427|439|464|0|12||60.0;427|443|464|0|16||80.0	12|18|36|15|21||30.0	24|42|70|27|45||90.0		NA	NA	NA	NA	NA	NA	NA	NA	NA	NA	TGTGCCAGCAGTGAAGGGACAACCCCAAATCAGCCCCAGCATTTT	36	NA	NA	NA	NA	NA	NA	NA	CASSEGTTPNQPQHF	NA	:::::::::0:-5:12:15:0:-6:21:27:-4:45:::
BM14	24	1	0.01	TGTGCCAGCAGCCAGGGGGAATGGGACGAGCAGTACTTC	EDEEEEEFEEFEFEEFEBFEECEAEDEEBEEEEAEADEE	TRBV6-2*00(248),TRBV6-3*00(248)	TRBD1*00(35)	TRBJ2-7*00(134)		427|438|464|0|11||55.0;427|438|464|0|11||55.0	16|23|36|12|19||35.0	25|39|67|25|39||70.0		NA	NA	NA	NA	NA	NA	NA	NA	NA	NA	TGTGCCAGCAGCCAGGGGGAATGGGACGAGCAGTACTTC	32	NA	NA	NA	NA	NA	NA	NA	CASSQGEWDEQYF	NA	:::::::::0:-6:11:12:-4:-1:19:25:-5:39:::
BM14	25	1	0.01	TGTGCCAGCAGTGACTCGGCAGGGGATAACACCGGGGAGCTGTTTTTT	DAE<E?AEEDDDE?EACEDCBEEEAD@:AE;DBDDEED7EEDEEEDED	TRBV6-4*00(185)	TRBD1*00(30)	TRBJ2-2*00(229)		427|445|464|0|18||90.0	16|22|36|19|25||30.0	22|43|71|27|48||105.0		NA	NA	NA	NA	NA	NA	NA	NA	NA	NA	TGTGCCAGCAGTGACTCGGCAGGGGATAACACCGGGGAGCTGTTTTTT	22	NA	NA	NA	NA	NA	NA	NA	CASSDSAGDNTGELFF	NA	:::::::::0:1:18:19:-4:-2:25:27:-2:48:::
BM14	26	1	0.01	TGTGCCAGCAGTGAAAGCGGCACAGATACGCAGTATTTT	EEFEDEDEECEEDEDAED?EEDCEDECEEEDEEDEEEEE	TRBV6-4*00(195)		TRBJ2-3*00(240)		427|441|464|0|14||70.0		21|41|69|19|39||100.0		NA	NA	NA	NA	NA	NA	NA	NA	NA	NA	TGTGCCAGCAGTGAAAGCGGCACAGATACGCAGTATTTT	30	NA	NA	NA	NA	NA	NA	NA	CASSESGTDTQYF	NA	:::::::::0:-3:14:::::19:-1:39:::
BM14	27	1	0.01	TGTGCCAGCAGTGACTCGGAGGGAACCACAGATACGCAGTATTTT	FEEEEEEEFEEEEEEEEEEEEEEEEEFEEFEFFEEEEFEEEEEEE	TRBV6-4*00(283)	TRBD2*00(25)	TRBJ2-3*00(235)		427|445|464|0|18||90.0	27|32|48|18|23||25.0	22|41|69|26|45||95.0		NA	NA	NA	NA	NA	NA	NA	NA	NA	NA	TGTGCCAGCAGTGACTCGGAGGGAACCACAGATACGCAGTATTTT	36	NA	NA	NA	NA	NA	NA	NA	CASSDSEGTTDTQYF	NA	:::::::::0:1:18:18:-11:0:23:26:-2:45:::
BM14	28	1	0.01	TGTGCCAGCAGTGATTACGGATCTAGCACAGATACGCAGTATTTT	EDECCEEEEDEEEBEEBEECCDEEECE>EEDDEBDBDDEEBEEEE	TRBV6-4*00(165),TRBV6-1*00(149)		TRBJ2-3*00(255)		427|441|464|0|14||70.0;427|441|464|0|14||70.0		18|41|69|22|45||115.0		NA	NA	NA	NA	NA	NA	NA	NA	NA	NA	TGTGCCAGCAGTGATTACGGATCTAGCACAGATACGCAGTATTTT	29	NA	NA	NA	NA	NA	NA	NA	CASSDYGSSTDTQYF	NA	:::::::::0:-3:14:::::22:2:45:::
BM14	29	1	0.01	TGTGCCAGCAGTCGGTCTAGCGGGGGCACAGATACGCAGTATTTT	E:EEEEEEEEEEEEEDEEEEEEECFEDEEEEEEEEEEEEEEEEEE	TRBV6-4*00(253)	TRBD2*00(40)	TRBJ2-3*00(240)		427|439|464|0|12||60.0	20|28|48|16|24||40.0	21|41|69|25|45||100.0		NA	NA	NA	NA	NA	NA	NA	NA	NA	NA	TGTGCCAGCAGTCGGTCTAGCGGGGGCACAGATACGCAGTATTTT	25	NA	NA	NA	NA	NA	NA	NA	CASSRSSGGTDTQYF	NA	:::::::::0:-5:12:16:-4:-4:24:25:-1:45:::
BM14	30	1	0.01	TGTGCCAGCACCCTATTTCGGAACACTGAAGCTTTCTTT	EEEEEEEEEEEEEEEEFEEEEEEEFEEEEEEEEEEEEEE	TRBV6-1*00(227),TRBV6-5*00(227),TRBV6-8*00(227),TRBV6-6*00(211)		TRBJ1-1*00(235)		427|437|464|0|10||50.0;427|437|464|0|10||50.0;424|434|461|0|10||50.0;427|437|464|0|10||50.0		21|40|68|20|39||95.0		NA	NA	NA	NA	NA	NA	NA	NA	NA	NA	TGTGCCAGCACCCTATTTCGGAACACTGAAGCTTTCTTT	36	NA	NA	NA	NA	NA	NA	NA	CASTLFRNTEAFF	NA	:::::::::0:-7:10:::::20:-1:39:::
BM14	31	1	0.01	TGTGCCAGCAGTCCCTATCGGGGGGGACTTGGCTACACCTTC	EDEDEEDDEDE>CDEEB:?<EE@EEBCEDEEEEE;E=?EEDC	TRBV6-1*00(237),TRBV6-5*00(237),TRBV6-8*00(237),TRBV6-6*00(221)	TRBD2*00(30)	TRBJ1-2*00(205)		427|439|464|0|12||60.0;427|439|464|0|12||60.0;424|436|461|0|12||60.0;427|439|464|0|12||60.0	16|22|48|23|29||30.0	27|40|68|29|42||65.0		NA	NA	NA	NA	NA	NA	NA	NA	NA	NA	TGTGCCAGCAGTCCCTATCGGGGGGGACTTGGCTACACCTTC	25	NA	NA	NA	NA	NA	NA	NA	CASSPYRGGLGYTF	NA	:::::::::0:-5:12:23:0:-10:29:29:-7:42:::
BM14	32	1	0.01	TGTGCCTCATCACGAGTCCGGGAGGGCCTCGATGAGCAGTTCTTC	7AE>E=;EAEEA87CE=B8DED:A7;DDECDCFEDDDDDDDDECE	TRBV6-1*00(120),TRBV6-4*00(120),TRBV6-5*00(120),TRBV6-6*00(120),TRBV10-3*00(110)	TRBD2*00(50)	TRBJ2-1*00(210)		427|433|464|0|6||30.0;427|433|464|0|6||30.0;427|433|464|0|6||30.0;427|433|464|0|6||30.0;427|433|464|0|6||30.0	24|34|48|18|28||50.0	28|42|70|31|45||70.0		NA	NA	NA	NA	NA	NA	NA	NA	NA	NA	TGTGCCTCATCACGAGTCCGGGAGGGCCTCGATGAGCAGTTCTTC	22	NA	NA	NA	NA	NA	NA	NA	CASSRVREGLDEQFF	NA	:::::::::0:-11:6:18:-8:2:28:31:-8:45:::
BM14	33	1	0.01	TGTGCCAGCAAGGATTGGAACACTGAAGCTTTCTTT	AC<E>EBBDBA;E@@CE9DDECBCD@E8CADDE@DD	TRBV7-6*00(205),TRBV7-7*00(189)		TRBJ1-1*00(235)		430|440|467|0|10||50.0;430|440|467|0|10||50.0		21|40|68|17|36||95.0		NA	NA	NA	NA	NA	NA	NA	NA	NA	NA	TGTGCCAGCAAGGATTGGAACACTGAAGCTTTCTTT	23	NA	NA	NA	NA	NA	NA	NA	CASKDWNTEAFF	NA	:::::::::0:-7:10:::::17:-1:36:::
BM14	34	1	0.01	TGTGCCAGCAGCGCCCCTTTTGGGGCAGATACGCAGTATTTT	EDECE?C@EBDEBDAC@EEED?DDCEEEEBED@EECEDEDEE	TRBV9*00(175)	TRBD1*00(25)	TRBJ2-3*00(225)		427|440|463|0|13||65.0	2|7|36|13|18||25.0	24|41|69|25|42||85.0		NA	NA	NA	NA	NA	NA	NA	NA	NA	NA	TGTGCCAGCAGCGCCCCTTTTGGGGCAGATACGCAGTATTTT	30	NA	NA	NA	NA	NA	NA	NA	CASSAPFGADTQYF	NA	:::::::::0:-3:13:13:10:-17:18:25:-4:42:::
BM15	3	58	0.204225	TGTGCCAGTAGTATAGGGGTCGGTTTAATGAACACTGAAGCTTTCTTT	FFFFFFFFEFFFFFFFFFFFFFFFFFFFFFFFFFFFFFFFFFFFFFFF	TRBV19*00(342.9)		TRBJ1-1*00(245)		427|443|464|0|16||80.0		19|40|68|27|48||105.0		NA	NA	NA	NA	NA	NA	NA	NA	NA	NA	TGTGCCAGTAGTATAGGGGTCGGTTTAATGAACACTGAAGCTTTCTTT	36	NA	NA	NA	NA	NA	NA	NA	CASSIGVGLMNTEAFF	NA	:::::::::0:-1:16:::::27:1:48:::
BM15	6	55	0.193662	TGCAGTGCTCGGACGGAGGGGAATTCACCCCTCCACTTT	FFFFFFFFFFFFFFFFFFFFFFEFFFEFFFFFFFFFFFF	TRBV20-1*00(382.1)	TRBD2*00(30)	TRBJ1-6*00(230)		421|430|455|0|9||45.0	26|32|48|14|20||30.0	27|45|73|21|39||90.0		NA	NA	NA	NA	NA	NA	NA	NA	NA	NA	TGCAGTGCTCGGACGGAGGGGAATTCACCCCTCCACTTT	36	NA	NA	NA	NA	NA	NA	NA	CSARTEGNSPLHF	NA	:::::::::0:-5:9:14:-10:0:20:21:-7:39:::
BM15	9	43	0.151408	TGTGCCAGCAGTGAACAGGGTGAGGGGACTGAAGCTTTCTTT	FFFFFFFFEFFFFFFEFFFFFFFFFFFFFFFFFFFFFFFFFF	TRBV6-2*00(234.9),TRBV6-3*00(234.9),TRBV6-1*00(218.5)	TRBD1*00(30)	TRBJ1-1*00(135)		427|439|464|0|12||60.0;427|439|464|0|12||60.0;427|442|464|0|15||75.0	15|21|36|14|20||30.0	25|40|68|27|42||75.0		NA	NA	NA	NA	NA	NA	NA	NA	NA	NA	TGTGCCAGCAGTGAACAGGGTGAGGGGACTGAAGCTTTCTTT	36	NA	NA	NA	NA	NA	NA	NA	CASSEQGEGTEAFF	NA	:::::::::0:-5:12:14:-3:-3:20:27:-5:42:::
BM15	10	36	0.126761	TGCAGCGTTCCCCGGCCAAACAATGAGCAGTTCTTC	FFFEFFFEEFFFFFEEFFFEFFEFFFFFFFFEFFFF	TRBV29-1*00(483.5)	TRBD1*00(25),TRBD2*00(25)	TRBJ2-1*00(225)		421|430|455|0|9||45.0	9|14|36|10|15||25.0;13|18|48|10|15||25.0	25|42|70|19|36||85.0		NA	NA	NA	NA	NA	NA	NA	NA	NA	NA	TGCAGCGTTCCCCGGCCAAACAATGAGCAGTTCTTC	36	NA	NA	NA	NA	NA	NA	NA	CSVPRPNNEQFF	NA	:::::::::0:-5:9:10:3:-10:15:19:-5:36:::
BM15	15	30	0.105634	TGTGCCAGTAGTAAGGAGACAGGGACTAATCAGCCCCAGCATTTT	FFFEEEFFFFFFFFFFFFFFFFFFFFFFFFFFFFFFFFFFFFFFF	TRBV19*00(329)	TRBD1*00(35),TRBD2*00(30)	TRBJ1-5*00(230)		427|440|464|0|13||65.0	14|21|36|17|24||35.0;16|22|48|21|27||30.0	24|42|70|27|45||90.0		NA	NA	NA	NA	NA	NA	NA	NA	NA	NA	TGTGCCAGTAGTAAGGAGACAGGGACTAATCAGCCCCAGCATTTT	36	NA	NA	NA	NA	NA	NA	NA	CASSKETGTNQPQHF	NA	:::::::::0:-4:13:17:-2:-3:24:27:-4:45:::
BM15	31	20	0.0704225	TGTGCCAGCAGCCCAGGACAGCTGAACACTGAAGCTTTCTTT	FEEEEFEEEEEEFFEEEEEEEEFEEEEEEEEEEEEEEE????	TRBV7-2*00(280),TRBV7-8*00(253)	TRBD1*00(30)	TRBJ1-1*00(121.1)	TRBC1*00(352.5),TRBC2*00(336.5)	430|442|467|0|12||60.0;430|442|467|0|12||60.0	13|19|36|15|21||30.0	20|40|68|22|42||100.0	;	NA	NA	NA	NA	NA	NA	NA	NA	NA	NA	TGTGCCAGCAGCCCAGGACAGCTGAACACTGAAGCTTTCTTT	30	NA	NA	NA	NA	NA	NA	NA	CASSPGQLNTEAFF	NA	:::::::::0:-5:12:15:-1:-5:21:22:0:42:::
BM15	35	16	0.056338	TGTGCCAGCAGGGGACAGATGACTGGAAACACCATATATTTT	FFFFFFFEFFFFFFEEFFEFFFFFFFFEEFEFFFFFEFFFFF	TRBV12-3*00(261),TRBV12-4*00(261)	TRBD1*00(35)	TRBJ1-3*00(125)		430|441|467|0|11||55.0;430|441|467|0|11||55.0	12|19|36|11|18||35.0	22|42|70|22|42||100.0		NA	NA	NA	NA	NA	NA	NA	NA	NA	NA	TGTGCCAGCAGGGGACAGATGACTGGAAACACCATATATTTT	36	NA	NA	NA	NA	NA	NA	NA	CASRGQMTGNTIYF	NA	:::::::::0:-6:11:11:0:-5:18:22:-2:42:::
BM15	37	7	0.0246479	TGTGCCAGCAGTTATGGGGGGCTTGAAGCTTTCTTT	EEEEDEEEEEDEEEDEEEEEEDEEDEDEEEEEEEEE	TRBV12-3*00(222),TRBV12-4*00(222)	TRBD1*00(30)	TRBJ1-1*00(159.8)		430|443|467|0|13||65.0;430|443|467|0|13||65.0	18|24|36|16|22||30.0	27|40|68|23|36||65.0		NA	NA	NA	NA	NA	NA	NA	NA	NA	NA	TGTGCCAGCAGTTATGGGGGGCTTGAAGCTTTCTTT	35	NA	NA	NA	NA	NA	NA	NA	CASSYGGLEAFF	NA	:::::::::0:-4:13:16:-6:0:22:23:-7:36:::
BM15	40	2	0.00704225	TGTGCCAGCAGTAACCCGACAGGGGAAGAGACCCAGTACTTC	EE8E;E=C@EED:D;<BBD=EBEEB;D@D=@9EEEED;CCAC	TRBV28*00(194)	TRBD1*00(40)	TRBJ2-5*00(225)		427|439|464|0|12||60.0	14|22|36|17|25||40.0	23|40|68|25|42||85.0		NA	NA	NA	NA	NA	NA	NA	NA	NA	NA	TGTGCCAGCAGTAACCCGACAGGGGAAGAGACCCAGTACTTC	23	NA	NA	NA	NA	NA	NA	NA	CASSNPTGEETQYF	NA	:::::::::0:-5:12:17:-2:-2:25:25:-3:42:::
BM15	41	2	0.00704225	TGTGCCAGCAGCGTGGGGTCGAGCTCCTACAATGAGCAGTTCTTC	DBD9E>@BE;BBEC=DEE8DB<?DC?EEBE>BB@EABD@<DD>E?	TRBV11-2*00(119.5),TRBV11-3*00(119.5),TRBV7-2*00(119.5),TRBV7-8*00(111.5)		TRBJ2-1*00(257)		430|442|467|0|12||60.0;430|442|467|0|12||60.0;430|442|467|0|12||60.0;430|442|467|0|12||60.0		17|42|70|20|45||125.0		NA	NA	NA	NA	NA	NA	NA	NA	NA	NA	TGTGCCAGCAGCGTGGGGTCGAGCTCCTACAATGAGCAGTTCTTC	23	NA	NA	NA	NA	NA	NA	NA	CASSVGSSSYNEQFF	NA	:::::::::0:-5:12:::::20:3:45:::
BM15	43	1	0.00352113	TGCGCCAGCAGGGGTGTATTAGCGGGTAGCTCCTACAATGAGCAGTTCTTC	BECEABDDEDEDDEDEE<DEEEEEEDED@DE@EEBEECEEEDEDCBBDEED	TRBV10-1*00(135)	TRBD2*00(35)	TRBJ2-1*00(180)		427|438|464|0|11||55.0	21|28|48|19|26||35.0	18|42|70|27|51||120.0		NA	NA	NA	NA	NA	NA	NA	NA	NA	NA	TGCGCCAGCAGGGGTGTATTAGCGGGTAGCTCCTACAATGAGCAGTTCTTC	27	NA	NA	NA	NA	NA	NA	NA	CASRGVLAGSSYNEQFF	NA	:::::::::0:-6:11:19:-5:-4:26:27:2:51:::
BM15	44	1	0.00352113	TGTGCCAGCAGTGTAGGTGGTAGGCAGTTCTTC	EEDDBDEEEEEEEEEEDEEEAEDEEEECEEEDE	TRBV12-3*00(214),TRBV12-4*00(214)		TRBJ2-1*00(190)		430|446|467|0|16|ST442G|64.0;430|446|467|0|16|ST442G|64.0		32|42|70|23|33||50.0		NA	NA	NA	NA	NA	NA	NA	NA	NA	NA	TGTGCCAGCAGTGTAGGTGGTAGGCAGTTCTTC	32	NA	NA	NA	NA	NA	NA	NA	CASSVGGRQFF	NA	:::::::::0:-1:16:::::23:-12:33:::
BM15	45	1	0.00352113	TGTGCCAGCAGTGTTAGTGCAGATACGCAGTATTTT	AEEE?EEDEDEDEEDEDDECEEEEEEEEEDEEECEE	TRBV12-3*00(200),TRBV12-4*00(200)		TRBJ2-3*00(225)		430|442|467|0|12||60.0;430|442|467|0|12||60.0		24|41|69|19|36||85.0		NA	NA	NA	NA	NA	NA	NA	NA	NA	NA	TGTGCCAGCAGTGTTAGTGCAGATACGCAGTATTTT	30	NA	NA	NA	NA	NA	NA	NA	CASSVSADTQYF	NA	:::::::::0:-5:12:::::19:-4:36:::
BM15	46	1	0.00352113	TGTGCTAGTGGCATACAGGGGGCTGGAAATGAAAAACTGTTTTTT	EF>EDEEEEFEEEEEEEEEEEEDEFEEEEEEEDBEEEFEEEEEEE	TRBV12-5*00(248)	TRBD1*00(45)	TRBJ1-4*00(108)		430|441|467|0|11||55.0	15|24|36|14|23||45.0	25|43|71|27|45||90.0		NA	NA	NA	NA	NA	NA	NA	NA	NA	NA	TGTGCTAGTGGCATACAGGGGGCTGGAAATGAAAAACTGTTTTTT	29	NA	NA	NA	NA	NA	NA	NA	CASGIQGAGNEKLFF	NA	:::::::::0:-6:11:14:-3:0:23:27:-5:45:::
BM15	48	1	0.00352113	TGTGCCAGCAGCCATCAAGTGAACACTGAAGCTTTCTTT	DEE>?D?7EAEEEEDDDBDE;;>E=CD;BD?DBBDEEDD	TRBV14*00(210)		TRBJ1-1*00(160)		430|444|467|0|14||70.0		20|40|68|19|39||100.0		NA	NA	NA	NA	NA	NA	NA	NA	NA	NA	TGTGCCAGCAGCCATCAAGTGAACACTGAAGCTTTCTTT	22	NA	NA	NA	NA	NA	NA	NA	CASSHQVNTEAFF	NA	:::::::::0:-3:14:::::19:0:39:::
BM15	49	1	0.00352113	TGTGCCACCAGCAGGAGGGGGGAGGGACGAGAGACCCAGTACTTC	EECFEEEEEEEEEEEEFEEEEEEFFEEEEEEDFCEEEEEEEEEEE	TRBV15*00(267)	TRBD2*00(35),TRBD1*00(30)	TRBJ2-5*00(220)		427|441|464|0|14||70.0	25|32|48|19|26||35.0;17|23|36|15|21||30.0	24|40|68|29|45||80.0		NA	NA	NA	NA	NA	NA	NA	NA	NA	NA	TGTGCCACCAGCAGGAGGGGGGAGGGACGAGAGACCCAGTACTTC	34	NA	NA	NA	NA	NA	NA	NA	CATSRRGEGRETQYF	NA	:::::::::0:-3:14:19:-9:0:26:29:-4:45:::
BM15	50	1	0.00352113	TGTGCCAGCAGCCAACGGGAAGCCTACGAGCAGTACTTC	;CEEEDD>E87?ED;DEDEEE>>ECBEEEDEEEBBECDE	TRBV16*00(215)	TRBD1*00(25),TRBD2*00(25)	TRBJ2-7*00(225)		430|445|467|0|15||75.0	11|16|36|15|20||25.0;15|20|48|15|20||25.0	22|39|67|22|39||85.0		NA	NA	NA	NA	NA	NA	NA	NA	NA	NA	TGTGCCAGCAGCCAACGGGAAGCCTACGAGCAGTACTTC	22	NA	NA	NA	NA	NA	NA	NA	CASSQREAYEQYF	NA	:::::::::0:-2:15:15:1:-8:20:22:-2:39:::
BM15	51	1	0.00352113	TGTGCCAGTAGTATAGGACAGGGGTCGGCTGAAGCTTTCTTT	DDED:B9DBEDCEEEDDCAEDDED;?DD6E;EEDAEEE7DDE	TRBV19*00(312)	TRBD1*00(40)	TRBJ1-1*00(210)		427|443|464|0|16||80.0	14|22|36|16|24||40.0	26|40|68|28|42||70.0		NA	NA	NA	NA	NA	NA	NA	NA	NA	NA	TGTGCCAGTAGTATAGGACAGGGGTCGGCTGAAGCTTTCTTT	21	NA	NA	NA	NA	NA	NA	NA	CASSIGQGSAEAFF	NA	:::::::::0:-1:16:16:-2:-2:24:28:-6:42:::
BM15	54	1	0.00352113	TGTGCCAGCAGTGGGGATGGAAACACTGAAGCTTTCTTT	CEEEEEEEEEEEEEEEEEEEE?EEDEEBEEBEEEEEEEE	TRBV2*00(205)		TRBJ1-1*00(230)		430|443|467|0|13||65.0		22|40|68|21|39||90.0		NA	NA	NA	NA	NA	NA	NA	NA	NA	NA	TGTGCCAGCAGTGGGGATGGAAACACTGAAGCTTTCTTT	30	NA	NA	NA	NA	NA	NA	NA	CASSGDGNTEAFF	NA	:::::::::0:-4:13:::::21:-2:39:::
BM15	57	1	0.00352113	TGTGCCAGCACCCCCTGGGGGGCAACTAATGAAAAACTGTTTTTT	FEEEEEEEFEFEEFFFEFFEEEEEEEEFEEEFEEEFEFEEFEFEF	TRBV28*00(238)	TRBD1*00(35)	TRBJ1-4*00(250)		427|437|464|0|10||50.0	1|8|36|10|17||35.0	19|43|71|21|45||120.0		NA	NA	NA	NA	NA	NA	NA	NA	NA	NA	TGTGCCAGCACCCCCTGGGGGGCAACTAATGAAAAACTGTTTTTT	36	NA	NA	NA	NA	NA	NA	NA	CASTPWGATNEKLFF	NA	:::::::::0:-7:10:10:11:-16:17:21:1:45:::
BM15	58	1	0.00352113	TGTGCCAGCGGGACAGGAGCATATGCCCAGCATTTT	DEEEDEDEEEEEDEEEEFEEEEEECEEEEEDEEEDE	TRBV28*00(249)	TRBD1*00(40)	TRBJ1-5*00(195)		427|436|464|0|9||45.0	12|20|36|9|17||40.0	31|42|70|25|36||55.0		NA	NA	NA	NA	NA	NA	NA	NA	NA	NA	TGTGCCAGCGGGACAGGAGCATATGCCCAGCATTTT	34	NA	NA	NA	NA	NA	NA	NA	CASGTGAYAQHF	NA	:::::::::0:-8:9:9:0:-4:17:25:-11:36:::
BM15	59	1	0.00352113	TGTGCCAGCAGGATCCAGGAGGCGAGCAATCAGCCCCAGCATTTT	DEEA=DDEACCDECBAD;AECA6<@DEE=;ED@CDECCECCECEE	TRBV28*00(165)	TRBD1*00(29),TRBD2*00(25)	TRBJ1-5*00(245)		427|438|464|0|11||55.0	16|25|36|15|24|SG20A|29.0;26|31|48|17|22||25.0	21|42|70|24|45||105.0		NA	NA	NA	NA	NA	NA	NA	NA	NA	NA	TGTGCCAGCAGGATCCAGGAGGCGAGCAATCAGCCCCAGCATTTT	21	NA	NA	NA	NA	NA	NA	NA	CASRIQEASNQPQHF	NA	:::::::::0:-6:11:15:-4:1:24:24:-1:45:::
BM15	63	1	0.00352113	TGTGCCAGCAGGCAGGACAGGGGGTGGGACTATGGCTACACCTTC	EDEEADD>?EED;EEEDDEE@EEBDEEEEEA<EEDDE<EEECED@	TRBV6-1*00(165),TRBV6-5*00(165),TRBV6-6*00(165),TRBV6-2*00(149),TRBV6-4*00(149)	TRBD1*00(50)	TRBJ1-2*00(225)		427|438|464|0|11||55.0;427|438|464|0|11||55.0;427|438|464|0|11||55.0;427|438|464|0|11||55.0;427|438|464|0|11||55.0	13|23|36|14|24||50.0	23|40|68|28|45||85.0		NA	NA	NA	NA	NA	NA	NA	NA	NA	NA	TGTGCCAGCAGGCAGGACAGGGGGTGGGACTATGGCTACACCTTC	26	NA	NA	NA	NA	NA	NA	NA	CASRQDRGWDYGYTF	NA	:::::::::0:-6:11:14:-1:-1:24:28:-3:45:::
BM15	64	1	0.00352113	TGTGCCAGCAGTCCCTCCGGGACAGGTCAATATAATTCACCCCTCCACTTT	EDE8EFFEEE;EEEEEEBFEEEEEEEEEEEEEEEBEEEEEEEEEEEDEEEE	TRBV6-1*00(140),TRBV6-4*00(140),TRBV6-5*00(140),TRBV6-6*00(140),TRBV10-3*00(124)	TRBD1*00(50)	TRBJ1-6*00(245)		427|439|464|0|12||60.0;427|439|464|0|12||60.0;427|439|464|0|12||60.0;427|439|464|0|12||60.0;427|439|464|0|12|ST434G|44.0	10|20|36|16|26||50.0	24|45|73|30|51||105.0		NA	NA	NA	NA	NA	NA	NA	NA	NA	NA	TGTGCCAGCAGTCCCTCCGGGACAGGTCAATATAATTCACCCCTCCACTTT	23	NA	NA	NA	NA	NA	NA	NA	CASSPSGTGQYNSPLHF	NA	:::::::::0:-5:12:16:2:-4:26:30:-4:51:::
BM15	66	1	0.00352113	TGTGCCAGCAGCCGTCTAGCGGGAGTAAATGGGGCGGGCGAGCAGTACTTC	EEEEEEEEEEFEEEEEEEE@EEEFF;EEEEEFEEEEEEDFEE=EDECEEEB	TRBV7-9*00(359)	TRBD2*00(50)	TRBJ2-7*00(205)		430|442|467|0|12||60.0	20|30|48|15|25||50.0	26|39|67|38|51||65.0		NA	NA	NA	NA	NA	NA	NA	NA	NA	NA	TGTGCCAGCAGCCGTCTAGCGGGAGTAAATGGGGCGGGCGAGCAGTACTTC	26	NA	NA	NA	NA	NA	NA	NA	CASSRLAGVNGAGEQYF	NA	:::::::::0:-5:12:15:-4:-2:25:38:-6:51:::
BM16	8	13	0.232143	TGTGCCACCCAATTCGGGTCTGAAGCTTTCTTT	EEEEEECEEEEAEEEEDEEDEEEEBEEEEEEEE	TRBV24-1*00(197.2)		TRBJ1-1*00(200.4)		427|436|465|0|9||45.0		26|40|68|19|33||70.0		NA	NA	NA	NA	NA	NA	NA	NA	NA	NA	TGTGCCACCCAATTCGGGTCTGAAGCTTTCTTT	32	NA	NA	NA	NA	NA	NA	NA	CATQFGSEAFF	NA	:::::::::0:-9:9:::::19:-6:33:::
BM16	11	11	0.196429	TGTGCCAGCAGCCAGGCCCGATTGGGGCAGTACTTC	EEEEEEDCEEEDEEEEEEEEDEEDDEEEEEEAEEEE	TRBV14*00(208.6)	TRBD2*00(25)	TRBJ2-7*00(173.6)		430|444|467|0|14||70.0	30|35|48|14|19||25.0	29|39|67|26|36||50.0		NA	NA	NA	NA	NA	NA	NA	NA	NA	NA	TGTGCCAGCAGCCAGGCCCGATTGGGGCAGTACTTC	32	NA	NA	NA	NA	NA	NA	NA	CASSQARLGQYF	NA	:::::::::0:-3:14:14:-14:3:19:26:-9:36:::
BM16	60	4	0.0714286	TGTGCCAGCAGCCCCAAAGAGGTGAATGAGCAGTTCTTC	EDEDECEDEEEDDEEECCEDEEEEDDEEEECEDEDEEBE	TRBV6-2*00(171),TRBV6-3*00(171),TRBV6-1*00(155),TRBV6-5*00(155),TRBV6-6*00(155)		TRBJ2-1*00(215)		427|438|464|0|11||55.0;427|438|464|0|11||55.0;427|438|464|0|11||55.0;427|438|464|0|11||55.0;427|438|464|0|11||55.0		27|42|70|24|39||75.0		NA	NA	NA	NA	NA	NA	NA	NA	NA	NA	TGTGCCAGCAGCCCCAAAGAGGTGAATGAGCAGTTCTTC	33	NA	NA	NA	NA	NA	NA	NA	CASSPKEVNEQFF	NA	:::::::::0:-6:11:::::24:-7:39:::
BM16	107	3	0.0535714	TGCAGTGCTCTCCAGCGGGAGCCCTACGAGCAGTACTTC	EEEEDDDC@EAEEECDEEEDDEEEECEEEEEEEECEEBD	TRBV20-1*00(185)		TRBJ2-7*00(205)		421|430|455|0|9||45.0		16|39|67|17|39|DT21|89.0		NA	NA	NA	NA	NA	NA	NA	NA	NA	NA	TGCAGTGCTCTCCAGCGGGAGCCCTACGAGCAGTACTTC	31	NA	NA	NA	NA	NA	NA	NA	CSALQREPYEQYF	NA	:::::::::0:-5:9:::::17:4:39:::
BM16	108	3	0.0535714	TGTGCCAGCAGCTACCCGGCCAGGGGGCGGTTGAACACTGAAGCTTTCTTT	EDFEEFEEEEEFECEEFEEEDEEFEFEEEFEEEECECEEEEEEEEEEFEEF	TRBV5-6*00(531)	TRBD1*00(45)	TRBJ1-1*00(115)		427|440|463|0|13||65.0	16|25|36|20|29||45.0	20|40|68|31|51||100.0		NA	NA	NA	NA	NA	NA	NA	NA	NA	NA	TGTGCCAGCAGCTACCCGGCCAGGGGGCGGTTGAACACTGAAGCTTTCTTT	34	NA	NA	NA	NA	NA	NA	NA	CASSYPARGRLNTEAFF	NA	:::::::::0:-3:13:20:-4:1:29:31:0:51:::
BM16	182	2	0.0357143	TGTGCCAGCAGTCCAGGGGGGGCAGCAGATACGCAGTATTTT	EFEEEEEEEFEEEEEFEFEEEEEEEEFEEEEEEEEEEEEEEE	TRBV12-3*00(229),TRBV12-4*00(229)	TRBD1*00(35)	TRBJ2-3*00(225)	TRBC2*00(97)	430|442|467|0|12||60.0;430|442|467|0|12||60.0	16|23|36|13|20||35.0	24|41|69|25|42||85.0		NA	NA	NA	NA	NA	NA	NA	NA	NA	NA	TGTGCCAGCAGTCCAGGGGGGGCAGCAGATACGCAGTATTTT	36	NA	NA	NA	NA	NA	NA	NA	CASSPGGAADTQYF	NA	:::::::::0:-5:12:13:-4:-1:20:25:-4:42:::
BM16	183	2	0.0357143	TGCAGTGCCGAACAGGGGACAGGAAACACCATATATTTT	DEEEEAEEDDEBEE@EEDCEECEDEDEEE<DEEEDEEDE	TRBV20-1*00(172)	TRBD1*00(35)	TRBJ1-3*00(230)		421|429|455|0|8||40.0	15|22|36|11|18||35.0	24|42|70|21|39||90.0		NA	NA	NA	NA	NA	NA	NA	NA	NA	NA	TGCAGTGCCGAACAGGGGACAGGAAACACCATATATTTT	27	NA	NA	NA	NA	NA	NA	NA	CSAEQGTGNTIYF	NA	:::::::::0:-6:8:11:-3:-2:18:21:-4:39:::
BM16	184	2	0.0357143	TGTGCCAGCAGTTACGGTCTCCATGGGGAGCAGTACTTC	EFEEEEEEEFEEEEEEEEFEEEEEEEEEEEEFEEEEEEE	TRBV6-5*00(407),TRBV6-6*00(359)		TRBJ2-7*00(126)		427|442|464|0|15||75.0;427|442|464|0|15||75.0		27|39|67|27|39||60.0		NA	NA	NA	NA	NA	NA	NA	NA	NA	NA	TGTGCCAGCAGTTACGGTCTCCATGGGGAGCAGTACTTC	36	NA	NA	NA	NA	NA	NA	NA	CASSYGLHGEQYF	NA	:::::::::0:-2:15:::::27:-7:39:::
BM16	185	2	0.0357143	TGTGCCAGCAGCTTAATGGACGACACCGGGGAGCTGTTTTTT	EEEDDEDDDEEEDDD?EECDDBDEBCDEEEEEDDEBEEEEEE	TRBV7-3*00(205)		TRBJ2-2*00(240)		430|446|467|0|16||80.0		23|43|71|22|42||100.0		NA	NA	NA	NA	NA	NA	NA	NA	NA	NA	TGTGCCAGCAGCTTAATGGACGACACCGGGGAGCTGTTTTTT	30	NA	NA	NA	NA	NA	NA	NA	CASSLMDDTGELFF	NA	:::::::::0:-1:16:::::22:-3:42:::
BM16	280	1	0.0178571	TGTGCCAGCAGCTTAGGGCAGGGGAGATACGAGCAGTACTTC	DEEDCDDECECDEEEEEBA?DEB@EDDCDEBDDCEDEB?DBD	TRBV11-3*00(205),TRBV11-1*00(189),TRBV11-2*00(189)	TRBD1*00(30)	TRBJ2-7*00(215)		430|446|467|0|16||80.0;430|446|467|0|16||80.0;430|446|467|0|16||80.0	16|22|36|18|24||30.0	24|39|67|27|42||75.0		NA	NA	NA	NA	NA	NA	NA	NA	NA	NA	TGTGCCAGCAGCTTAGGGCAGGGGAGATACGAGCAGTACTTC	30	NA	NA	NA	NA	NA	NA	NA	CASSLGQGRYEQYF	NA	:::::::::0:-1:16:18:-4:-2:24:27:-4:42:::
BM16	281	1	0.0178571	TGTGCCAGCAACAAGGGACAGAACACTGAAGCTTTCTTT	DDB?8DDDD?;EDEE@E>DECCDE?;C?DE=AADDCB8D	TRBV12-3*00(174),TRBV12-4*00(174)	TRBD1*00(30)	TRBJ1-1*00(235)		430|440|467|0|10||50.0;430|440|467|0|10||50.0	12|18|36|14|20||30.0	21|40|68|20|39||95.0		NA	NA	NA	NA	NA	NA	NA	NA	NA	NA	TGTGCCAGCAACAAGGGACAGAACACTGAAGCTTTCTTT	23	NA	NA	NA	NA	NA	NA	NA	CASNKGQNTEAFF	NA	:::::::::0:-7:10:14:0:-6:20:20:-1:39:::
BM16	282	1	0.0178571	TGTGCCAGCAGTTTACTCGGGTGGGACAACAATGAGCAGTTCTTC	BDBD8E>=EBEABD=ED9BEEDE7;6EC@EBCC?CDECAC9EDDB	TRBV12-3*00(165),TRBV12-4*00(165)	TRBD1*00(30)	TRBJ2-1*00(225)		430|445|467|0|15||75.0;430|445|467|0|15||75.0	12|18|36|22|28||30.0	25|42|70|28|45||85.0		NA	NA	NA	NA	NA	NA	NA	NA	NA	NA	TGTGCCAGCAGTTTACTCGGGTGGGACAACAATGAGCAGTTCTTC	21	NA	NA	NA	NA	NA	NA	NA	CASSLLGWDNNEQFF	NA	:::::::::0:-2:15:22:0:-6:28:28:-5:45:::
BM16	283	1	0.0178571	TGTGCCAGTAGTAAAGACCCCTCTGGGGCTTCCAATCAGCCCCAGCATTTT	EBEABEECEEEEBEECCDEEBEEE?EEEDDECEE@DEEDEEDCCEDEEEDE	TRBV19*00(333)	TRBD1*00(25),TRBD2*00(25)	TRBJ1-5*00(235)		427|444|464|0|17|ST440A|69.0	2|7|36|17|22||25.0;0|5|48|18|23||25.0	23|42|70|32|51||95.0		NA	NA	NA	NA	NA	NA	NA	NA	NA	NA	TGTGCCAGTAGTAAAGACCCCTCTGGGGCTTCCAATCAGCCCCAGCATTTT	30	NA	NA	NA	NA	NA	NA	NA	CASSKDPSGASNQPQHF	NA	:::::::::0:0:17:17:10:-17:22:32:-3:51:::
BM16	284	1	0.0178571	TGTGCCAGCGTCGGCAGGGGAAGCAATCAGCCCCAGCATTTT	FEEEEEEEEFEEEFEFFEEFEEEEFEEEEEFEFFEEEEFEEE	TRBV2*00(304)	TRBD1*00(30)	TRBJ1-5*00(245)		430|439|467|0|9||45.0	16|22|36|14|20||30.0	21|42|70|21|42||105.0		NA	NA	NA	NA	NA	NA	NA	NA	NA	NA	TGTGCCAGCGTCGGCAGGGGAAGCAATCAGCCCCAGCATTTT	36	NA	NA	NA	NA	NA	NA	NA	CASVGRGSNQPQHF	NA	:::::::::0:-8:9:14:-4:-2:20:21:-1:42:::
BM16	285	1	0.0178571	TGTGCCAGCAGTTCAGGGGAGGACGAGCAGTTCTTC	DEA7@E>@DCCA=EBBDDDCEC7AC;>E>DDAD<DE	TRBV2*00(195)	TRBD1*00(30),TRBD2*00(30)	TRBJ2-1*00(200)		430|442|467|0|12||60.0	16|22|36|13|19||30.0;25|31|48|16|22||30.0	30|42|70|24|36||60.0		NA	NA	NA	NA	NA	NA	NA	NA	NA	NA	TGTGCCAGCAGTTCAGGGGAGGACGAGCAGTTCTTC	22	NA	NA	NA	NA	NA	NA	NA	CASSSGEDEQFF	NA	:::::::::0:-5:12:13:-4:-2:19:24:-10:36:::
BM16	289	1	0.0178571	TGTGCCGCCCAATTCGGGTCTGAAGCTTTCTTT	EEFDDEDDEDDEFDDDBDCEEDACEDDFEBDED	TRBV24-1*00(253)		TRBJ1-1*00(210)		427|433|465|0|6||30.0		26|40|68|19|33||70.0		NA	NA	NA	NA	NA	NA	NA	NA	NA	NA	TGTGCCGCCCAATTCGGGTCTGAAGCTTTCTTT	32	NA	NA	NA	NA	NA	NA	NA	CAAQFGSEAFF	NA	:::::::::0:-12:6:::::19:-6:33:::
BM16	290	1	0.0178571	TGTGCCAGCAGTTTAGTGGTGTCCCGCACAGATACGCAGTATTTT	EE@E@DEEEDEDDEDEADEEAC<CEEDB=DEEE<DCEEEAED@ED	TRBV28*00(170)	TRBD1*00(30)	TRBJ2-3*00(240)		427|442|464|0|15||75.0	6|12|36|19|25||30.0	21|41|69|25|45||100.0		NA	NA	NA	NA	NA	NA	NA	NA	NA	NA	TGTGCCAGCAGTTTAGTGGTGTCCCGCACAGATACGCAGTATTTT	27	NA	NA	NA	NA	NA	NA	NA	CASSLVVSRTDTQYF	NA	:::::::::0:-2:15:19:6:-12:25:25:-1:45:::
BM16	292	1	0.0178571	TGTGCCAGCAGCTTGGGGCAGGGGGTCAATCAGCCCCAGCATTTT	EEEEEEEFFEEEEEEEEEEEFEEEFEEEEEEEEEEEEEEEEEEEE	TRBV5-8*00(637)	TRBD1*00(35)	TRBJ1-5*00(133)		427|443|463|0|16||80.0	16|23|36|18|25||35.0	23|42|70|26|45||95.0		NA	NA	NA	NA	NA	NA	NA	NA	NA	NA	TGTGCCAGCAGCTTGGGGCAGGGGGTCAATCAGCCCCAGCATTTT	36	NA	NA	NA	NA	NA	NA	NA	CASSLGQGVNQPQHF	NA	:::::::::0:0:16:18:-4:-1:25:26:-3:45:::
BM16	293	1	0.0178571	TGTGCCAGCAGTTACTCTCCGGGTCACGGGGGCTACACCTTC	EDDDCBCEDBE;D<DD@B?>D9E<EAACEBCEEB6E>CBBCA	TRBV6-2*00(210),TRBV6-3*00(210),TRBV6-5*00(194),TRBV6-6*00(194)	TRBD1*00(28),TRBD2*00(25)	TRBJ1-2*00(200)		427|444|464|0|17||85.0;427|444|464|0|17||85.0;427|444|464|0|17||85.0;427|444|464|0|17||85.0	10|22|36|18|30|SA15TSG18C|28.0;14|19|48|18|23||25.0	28|40|68|30|42||60.0		NA	NA	NA	NA	NA	NA	NA	NA	NA	NA	TGTGCCAGCAGTTACTCTCCGGGTCACGGGGGCTACACCTTC	21	NA	NA	NA	NA	NA	NA	NA	CASSYSPGHGGYTF	NA	:::::::::0:0:17:18:2:-2:30:30:-8:42:::
BM16	294	1	0.0178571	TGTGCCAGCAGTTACCGGGACAATCAGCCCCAGCATTTT	EDEEDEECEEEEEEEEEEEDEEEEEEEEEDEEEEEEEEE	TRBV6-2*00(268),TRBV6-3*00(268)	TRBD1*00(25),TRBD2*00(25)	TRBJ1-5*00(235)		427|442|464|0|15||75.0;427|442|464|0|15||75.0	11|16|36|15|20||25.0;15|20|48|15|20||25.0	23|42|70|20|39||95.0		NA	NA	NA	NA	NA	NA	NA	NA	NA	NA	TGTGCCAGCAGTTACCGGGACAATCAGCCCCAGCATTTT	34	NA	NA	NA	NA	NA	NA	NA	CASSYRDNQPQHF	NA	:::::::::0:-2:15:15:1:-8:20:20:-3:39:::
BM16	295	1	0.0178571	TGTGCCAGCAGTTACGGTAGCACAGATACGCAGTATTTT	DDAEDBBD>E=?=<;DEB>AEDCDEDCCDCEDAADDD@A	TRBV6-5*00(184),TRBV6-6*00(184),TRBV6-1*00(169),TRBV6-2*00(168),TRBV6-3*00(168)		TRBJ2-3*00(250)		427|442|464|0|15||75.0;427|442|464|0|15||75.0;427|439|464|0|12||60.0;427|442|464|0|15||75.0;427|442|464|0|15||75.0		19|41|69|17|39||110.0		NA	NA	NA	NA	NA	NA	NA	NA	NA	NA	TGTGCCAGCAGTTACGGTAGCACAGATACGCAGTATTTT	26	NA	NA	NA	NA	NA	NA	NA	CASSYGSTDTQYF	NA	:::::::::0:-2:15:::::17:1:39:::
BM16	296	1	0.0178571	TGTGCCACCGAGGATGACACAACAGATACGCAGTATTTT	DDEECEDEDEEEEEEEEEEEEDEEBEDEEBEEEFEE?EF	TRBV6-5*00(646)		TRBJ2-3*00(121)		427|434|464|0|7||35.0		23|41|69|21|39||90.0		NA	NA	NA	NA	NA	NA	NA	NA	NA	NA	TGTGCCACCGAGGATGACACAACAGATACGCAGTATTTT	30	NA	NA	NA	NA	NA	NA	NA	CATEDDTTDTQYF	NA	:::::::::0:-10:7:::::21:-3:39:::
BM16	299	1	0.0178571	TGTGCCAGCAGCGTAGATAGGGACAACTATGGCTACACCTTC	EEED@EEEEEEEE<DEDDEEEDEEEEEDDEEEEE<EEEEEDE	TRBV9*00(189)	TRBD1*00(25),TRBD2*00(25)	TRBJ1-2*00(230)		427|443|463|0|16||80.0	12|17|36|19|24||25.0;16|21|48|19|24||25.0	22|40|68|24|42||90.0		NA	NA	NA	NA	NA	NA	NA	NA	NA	NA	TGTGCCAGCAGCGTAGATAGGGACAACTATGGCTACACCTTC	27	NA	NA	NA	NA	NA	NA	NA	CASSVDRDNYGYTF	NA	:::::::::0:0:16:19:0:-7:24:24:-2:42:::
BM17	18	8	0.121212	TGTGCCATCAAAAGGACAGGGTCTGGAGAGGAAAAACTGTTTTTT	FFEFFEFFFFFEFFFEEEFFFEFFFFFEFFFFFFFFEFFFFEFEF	TRBV10-3*00(242)	TRBD1*00(40)	TRBJ1-4*00(205)		427|437|464|0|10||50.0	13|21|36|13|21||40.0	28|43|71|30|45||75.0		NA	NA	NA	NA	NA	NA	NA	NA	NA	NA	TGTGCCATCAAAAGGACAGGGTCTGGAGAGGAAAAACTGTTTTTT	36	NA	NA	NA	NA	NA	NA	NA	CAIKRTGSGEEKLFF	NA	:::::::::0:-7:10:13:-1:-3:21:30:-8:45:::
BM17	19	8	0.121212	TGTGCCACCAGCAGAGGGTCCTTTGCCTACGAGCAGTACTTC	EEEEFEFFFFFEFFFEFEEFFFFFFFFFEFFFFFFFFEFFEE	TRBV15*00(277)		TRBJ2-7*00(145)		427|443|464|0|16||80.0		22|39|67|25|42||85.0		NA	NA	NA	NA	NA	NA	NA	NA	NA	NA	TGTGCCACCAGCAGAGGGTCCTTTGCCTACGAGCAGTACTTC	36	NA	NA	NA	NA	NA	NA	NA	CATSRGSFAYEQYF	NA	:::::::::0:-1:16:::::25:-2:42:::
BM17	20	8	0.121212	TGTGCCAGCAGCCTGCCGGGACAGGGTACGAACACCGGGGAGCTGTTTTTT	FFEEEEEEEEFEEFFEFFFFEFFFEFEEFEEEFEEFEEEEEEEEEFEFEFF	TRBV7-3*00(349)	TRBD1*00(55)	TRBJ2-2*00(255)		430|442|467|0|12||60.0	10|21|36|15|26||55.0	20|43|71|28|51||115.0		NA	NA	NA	NA	NA	NA	NA	NA	NA	NA	TGTGCCAGCAGCCTGCCGGGACAGGGTACGAACACCGGGGAGCTGTTTTTT	36	NA	NA	NA	NA	NA	NA	NA	CASSLPGQGTNTGELFF	NA	:::::::::0:-5:12:15:2:-3:26:28:0:51:::
BM17	24	7	0.106061	TGTGCCAGCAGCTTACGGGACTACCTAGAGCAGTTCTTC	FFEEFEFFEFFFFFEFFEFEFFEFFEFFFFFFFFEEFEF	TRBV11-2*00(428),TRBV11-3*00(396),TRBV11-1*00(380)	TRBD2*00(40)	TRBJ2-1*00(200)		430|445|467|0|15||75.0;430|445|467|0|15||75.0;430|445|467|0|15||75.0	15|23|48|15|23||40.0	30|42|70|27|39||60.0		NA	NA	NA	NA	NA	NA	NA	NA	NA	NA	TGTGCCAGCAGCTTACGGGACTACCTAGAGCAGTTCTTC	36	NA	NA	NA	NA	NA	NA	NA	CASSLRDYLEQFF	NA	:::::::::0:-2:15:15:1:-9:23:27:-10:39:::
BM17	33	6	0.0909091	TGTGCCAGCAGCTTAGGGACTAGCCTCTACGAGCAGTACTTC	FFEFEFEEEEFFEFFFEFEFEEFEEEFFEFEEEEFEFEFEEF	TRBV7-2*00(252),TRBV7-8*00(230)	TRBD2*00(40)	TRBJ2-7*00(217.3)		430|446|467|0|16||80.0;430|446|467|0|16||80.0	17|25|48|16|24||40.0	23|39|67|26|42||80.0		NA	NA	NA	NA	NA	NA	NA	NA	NA	NA	TGTGCCAGCAGCTTAGGGACTAGCCTCTACGAGCAGTACTTC	36	NA	NA	NA	NA	NA	NA	NA	CASSLGTSLYEQYF	NA	:::::::::0:-1:16:16:-1:-7:24:26:-3:42:::
BM17	40	5	0.0757576	TGTGCCAGCAGGAGGACAGGGTACAACACTGAAGCTTTCTTT	FFFEFFFEEEEEFEEEEFFFFEEEEFFEEFFFFEEEEFFFFF	TRBV12-3*00(244.8),TRBV12-4*00(244.8)	TRBD1*00(40)	TRBJ1-1*00(230)		430|441|467|0|11||55.0;430|441|467|0|11||55.0	13|21|36|13|21||40.0	22|40|68|24|42||90.0		NA	NA	NA	NA	NA	NA	NA	NA	NA	NA	TGTGCCAGCAGGAGGACAGGGTACAACACTGAAGCTTTCTTT	36	NA	NA	NA	NA	NA	NA	NA	CASRRTGYNTEAFF	NA	:::::::::0:-6:11:13:-1:-3:21:24:-2:42:::
BM17	48	3	0.0454545	TGTGCCAGCTCCCGTGGGGTTAGCTATGGCTACACCTTC	EEEEFEEEEEEEEEEEEEFEEEFEEEEEEEEEEEFEEFE	TRBV12-3*00(160),TRBV12-4*00(160)	TRBD1*00(25),TRBD2*00(25)	TRBJ1-2*00(220)		430|439|467|0|9||45.0;430|439|467|0|9||45.0	8|13|36|9|14||25.0;3|8|48|9|14||25.0	24|40|68|23|39||80.0		NA	NA	NA	NA	NA	NA	NA	NA	NA	NA	TGTGCCAGCTCCCGTGGGGTTAGCTATGGCTACACCTTC	36	NA	NA	NA	NA	NA	NA	NA	CASSRGVSYGYTF	NA	:::::::::0:-8:9:9:4:-11:14:23:-4:39:::
BM17	49	2	0.030303	TGTGCCAGCCAAGACCAAGGGAGGGTCACCGGGGAGCTGTTTTTT	EEEEEEEEFEEEEEEEEEEEFEEEEEEEEEFEEEFEDEEEEEFEE	TRBV4-2*00(318),TRBV4-3*00(302)	TRBD2*00(35)	TRBJ2-2*00(119)		427|436|464|0|9||45.0;427|436|464|0|9|SC429T|29.0	25|32|48|18|25||35.0	24|43|71|26|45||95.0		NA	NA	NA	NA	NA	NA	NA	NA	NA	NA	TGTGCCAGCCAAGACCAAGGGAGGGTCACCGGGGAGCTGTTTTTT	35	NA	NA	NA	NA	NA	NA	NA	CASQDQGRVTGELFF	NA	:::::::::0:-8:9:18:-9:0:25:26:-4:45:::
BM17	53	1	0.0151515	TGCGCCAGCAGCGCTCAAGGGAACACTGAAGCTTTCTTT	CEEDEAEEEDAEEEEEEEEEEEEEEDEEEEBEEEEEEEE	TRBV10-2*00(179)		TRBJ1-1*00(235)		427|438|464|0|11||55.0		21|40|68|20|39||95.0		NA	NA	NA	NA	NA	NA	NA	NA	NA	NA	TGCGCCAGCAGCGCTCAAGGGAACACTGAAGCTTTCTTT	32	NA	NA	NA	NA	NA	NA	NA	CASSAQGNTEAFF	NA	:::::::::0:-6:11:::::20:-1:39:::
BM17	55	1	0.0151515	TGTGCCAGCAGTCCGGCGGGGGGTATCAAGCGCCATGAGCAGTTCTTC	EEEEBECEEEEEEEEEEEEEEEEEEEEEEEEEEECEEEEEEEEDEEEE	TRBV12-3*00(135),TRBV12-4*00(135)	TRBD1*00(25),TRBD2*00(25)	TRBJ2-1*00(210)		430|442|467|0|12||60.0;430|442|467|0|12||60.0	18|23|36|17|22||25.0;23|28|48|15|20||25.0	28|42|70|34|48||70.0		NA	NA	NA	NA	NA	NA	NA	NA	NA	NA	TGTGCCAGCAGTCCGGCGGGGGGTATCAAGCGCCATGAGCAGTTCTTC	33	NA	NA	NA	NA	NA	NA	NA	CASSPAGGIKRHEQFF	NA	:::::::::0:-5:12:17:-6:-1:22:34:-8:48:::
BM17	56	1	0.0151515	TGTGCTAGTGGTTTTGAGGGGTACAACAATGAGCAGTTCTTC	CECEABE;EDE;AADECBEE:EDEE@CEDECEDEEDDDBEEC	TRBV12-5*00(175)	TRBD1*00(25),TRBD2*00(25)	TRBJ2-1*00(225)		430|444|467|0|14||70.0	17|22|36|16|21||25.0;27|32|48|15|20||25.0	25|42|70|25|42||85.0		NA	NA	NA	NA	NA	NA	NA	NA	NA	NA	TGTGCTAGTGGTTTTGAGGGGTACAACAATGAGCAGTTCTTC	25	NA	NA	NA	NA	NA	NA	NA	CASGFEGYNNEQFF	NA	:::::::::0:-3:14:16:-5:-2:21:25:-5:42:::
BM17	57	1	0.0151515	TGTGCCAGCAGGTCGGGGGTTTTTAACACCGAGGAGCTGTTTTTT	EEEEDEBEEEDEDEEEECDEEECEBEEECA@>EE>=EC=A?EEE?	TRBV19*00(304)	TRBD1*00(25)	TRBJ2-2*00(84)		427|435|464|0|8||40.0	18|23|36|14|19||25.0	22|43|71|24|45|SG29A|89.0		NA	NA	NA	NA	NA	NA	NA	NA	NA	NA	TGTGCCAGCAGGTCGGGGGTTTTTAACACCGAGGAGCTGTTTTTT	28	NA	NA	NA	NA	NA	NA	NA	CASRSGVFNTEELFF	NA	:::::::::0:-9:8:14:-6:-1:19:24:-2:45:::
BM17	58	1	0.0151515	TGTGCCAGCAGACAAGAGACCCAGTACTTC	EEEEEEEEEEEDEEDEECDEA:EEECECEE	TRBV2*00(265)		TRBJ2-5*00(230)		430|441|467|0|11||55.0		22|40|68|12|30||90.0		NA	NA	NA	NA	NA	NA	NA	NA	NA	NA	TGTGCCAGCAGACAAGAGACCCAGTACTTC	25	NA	NA	NA	NA	NA	NA	NA	CASRQETQYF	NA	:::::::::0:-6:11:::::12:-2:30:::
BM17	59	1	0.0151515	TGCAGTGCTAGAGATACACAGGGGCGTGAAGCTTTCTTT	FEEEEEEEEEEEEEEEEEEEEEEEEEEEEEECDEEEEEE	TRBV20-1*00(413)	TRBD1*00(35)	TRBJ1-1*00(205)		421|436|455|0|15||75.0	15|22|36|17|24||35.0	27|40|68|26|39||65.0		NA	NA	NA	NA	NA	NA	NA	NA	NA	NA	TGCAGTGCTAGAGATACACAGGGGCGTGAAGCTTTCTTT	34	NA	NA	NA	NA	NA	NA	NA	CSARDTQGREAFF	NA	:::::::::0:1:15:17:-3:-2:24:26:-7:39:::
BM17	60	1	0.0151515	TGTGCCAGCAGTAAAGCCACAGGGTTGAACACTGAAGCTTTCTTT	EECEE@CEEEEAE>DEDEEEEEEEBEEEEEEECEEEECEEEEEEE	TRBV28*00(264)	TRBD1*00(30)	TRBJ1-1*00(240)		427|439|464|0|12||60.0	15|21|36|18|24||30.0	20|40|68|25|45||100.0		NA	NA	NA	NA	NA	NA	NA	NA	NA	NA	TGTGCCAGCAGTAAAGCCACAGGGTTGAACACTGAAGCTTTCTTT	29	NA	NA	NA	NA	NA	NA	NA	CASSKATGLNTEAFF	NA	:::::::::0:-5:12:18:-3:-3:24:25:0:45:::
BM17	62	1	0.0151515	TGTGCCAGCAGTTTCAGGGGGCGTTCTGTAACTAATGAAAAACTGTTTTTT	BDE:=6E8CEEEB==CAACCAEDD@=ECEEDDEEACCDEEDDAEDEEDDDE	TRBV28*00(169)	TRBD1*00(45)	TRBJ1-4*00(240)		427|441|464|0|14||70.0	16|25|36|14|23||45.0	21|43|71|29|51||110.0		NA	NA	NA	NA	NA	NA	NA	NA	NA	NA	TGTGCCAGCAGTTTCAGGGGGCGTTCTGTAACTAATGAAAAACTGTTTTTT	21	NA	NA	NA	NA	NA	NA	NA	CASSFRGRSVTNEKLFF	NA	:::::::::0:-3:14:14:-4:1:23:29:-1:51:::
BM17	63	1	0.0151515	TGTGCCAGCAGGGAACTAGCGGGTAACACCGGGGAGCTGTTTTTT	EEE8AEFEECFEEE<EEEEEEFE<CEEDEDEEEEEDEEEEEEEEE	TRBV6-1*00(169),TRBV6-5*00(165),TRBV6-6*00(165),TRBV6-2*00(149),TRBV6-3*00(149)	TRBD2*00(40)	TRBJ2-2*00(245)		427|442|464|0|15|ST438G|59.0;427|438|464|0|11||55.0;427|438|464|0|11||55.0;427|438|464|0|11||55.0;427|438|464|0|11||55.0	20|28|48|15|23||40.0	22|43|71|24|45||105.0		NA	NA	NA	NA	NA	NA	NA	NA	NA	NA	TGTGCCAGCAGGGAACTAGCGGGTAACACCGGGGAGCTGTTTTTT	23	NA	NA	NA	NA	NA	NA	NA	CASRELAGNTGELFF	NA	:::::::::0:-2:15:15:-4:-4:23:24:-2:45:::
BM17	64	1	0.0151515	TGTGCCAGCAGTTACTCTTTCCAGTTGCAGTTCTTC	EEBDDE<;D?@EE>EEECDEEE=EDDADDD>@EEED	TRBV6-2*00(188),TRBV6-3*00(188),TRBV6-5*00(172),TRBV6-6*00(172)		TRBJ2-1*00(190)		427|444|464|0|17||85.0;427|444|464|0|17||85.0;427|444|464|0|17||85.0;427|444|464|0|17||85.0		32|42|70|26|36||50.0		NA	NA	NA	NA	NA	NA	NA	NA	NA	NA	TGTGCCAGCAGTTACTCTTTCCAGTTGCAGTTCTTC	26	NA	NA	NA	NA	NA	NA	NA	CASSYSFQLQFF	NA	:::::::::0:0:17:::::26:-12:36:::
BM17	65	1	0.0151515	TGTGCCAGCAGTTACTCTTCAGACTATACGCAGTATTTT	EBEEEEF@EBEEECEEFEECFDEEEEDECDEFAEEEEEE	TRBV6-2*00(268),TRBV6-3*00(268)		TRBJ2-3*00(210)		427|444|464|0|17||85.0;427|444|464|0|17||85.0		27|41|69|25|39||70.0		NA	NA	NA	NA	NA	NA	NA	NA	NA	NA	TGTGCCAGCAGTTACTCTTCAGACTATACGCAGTATTTT	31	NA	NA	NA	NA	NA	NA	NA	CASSYSSDYTQYF	NA	:::::::::0:0:17:::::25:-7:39:::
BM17	66	1	0.0151515	TGTGCCAGCAGCCGGGACAGGGCCTACGAGCAGTACTTC	EDEEEDE<EEEDDEEDDEEEDDEEE<EADEEEEEDEADE	TRBV6-2*00(232),TRBV6-3*00(232)	TRBD1*00(55)	TRBJ2-7*00(225)		427|438|464|0|11||55.0;427|438|464|0|11||55.0	10|21|36|11|22||55.0	22|39|67|22|39||85.0		NA	NA	NA	NA	NA	NA	NA	NA	NA	NA	TGTGCCAGCAGCCGGGACAGGGCCTACGAGCAGTACTTC	27	NA	NA	NA	NA	NA	NA	NA	CASSRDRAYEQYF	NA	:::::::::0:-6:11:11:2:-3:22:22:-2:39:::
BM17	69	1	0.0151515	TGTGCCAGCAGCCTCGGGGGGACAATCACTGAAGCTTTCTTT	FEEEEEEEFEEEFEEEEEEEEEEFEEEFEEEFEEEFEEEEFE	TRBV6-1*00(232),TRBV6-5*00(232),TRBV6-8*00(232),TRBV6-6*00(216)	TRBD1*00(30)	TRBJ1-1*00(220)		427|438|464|0|11||55.0;427|438|464|0|11||55.0;424|435|461|0|11||55.0;427|438|464|0|11||55.0	12|18|36|18|24||30.0	24|40|68|26|42||80.0		NA	NA	NA	NA	NA	NA	NA	NA	NA	NA	TGTGCCAGCAGCCTCGGGGGGACAATCACTGAAGCTTTCTTT	36	NA	NA	NA	NA	NA	NA	NA	CASSLGGTITEAFF	NA	:::::::::0:-6:11:18:0:-6:24:26:-4:42:::
BM17	70	1	0.0151515	TGTGCCAGCAGCTTAAACTCCGGGACAGTTAATTCACCCCTCCACTTT	EEEDECDEEDEDEDE:DDD@EBEDDEEDEDECDEEDCD>EEDEB>EDE	TRBV7-6*00(170),TRBV11-1*00(154),TRBV7-7*00(154),TRBV7-9*00(154)	TRBD1*00(45)	TRBJ1-6*00(219)		430|445|467|0|15||75.0;430|445|467|0|15||75.0;430|445|467|0|15||75.0;430|445|467|0|15||75.0	10|19|36|19|28||45.0	26|45|73|29|48||95.0		NA	NA	NA	NA	NA	NA	NA	NA	NA	NA	TGTGCCAGCAGCTTAAACTCCGGGACAGTTAATTCACCCCTCCACTTT	25	NA	NA	NA	NA	NA	NA	NA	CASSLNSGTVNSPLHF	NA	:::::::::0:-2:15:19:2:-5:28:29:-6:48:::
BM17	71	1	0.0151515	TGTGCCAGCAGCCTCCAAACAGGGTCCTCTGGAAACACCATATATTTT	DEEDEEECDEBEEDCEEE?EEEEBDEDDAEEEEDEEEDEEEEEEEECD	TRBV7-8*00(155)	TRBD1*00(30)	TRBJ1-3*00(250)		430|442|467|0|12||60.0	15|21|36|18|24||30.0	20|42|70|26|48||110.0		NA	NA	NA	NA	NA	NA	NA	NA	NA	NA	TGTGCCAGCAGCCTCCAAACAGGGTCCTCTGGAAACACCATATATTTT	30	NA	NA	NA	NA	NA	NA	NA	CASSLQTGSSGNTIYF	NA	:::::::::0:-5:12:18:-3:-3:24:26:0:48:::
BM17	72	1	0.0151515	TGTGCCAGCAGCTTAGCGCCATCGGGGGATACGCAGTATTTT	EEEEEEEEEEEEEEDEEEEEDEEEEEEEEEEEEEEEEEEEEE	TRBV7-8*00(205),TRBV7-2*00(189)		TRBJ2-3*00(215)		430|449|467|0|19||95.0;430|449|467|0|19||95.0		26|41|69|27|42||75.0		NA	NA	NA	NA	NA	NA	NA	NA	NA	NA	TGTGCCAGCAGCTTAGCGCCATCGGGGGATACGCAGTATTTT	35	NA	NA	NA	NA	NA	NA	NA	CASSLAPSGDTQYF	NA	:::::::::0:2:19:::::27:-6:42:::
BM17	73	1	0.0151515	TGTGCCAGCAGCCGAGGACAGGGCTCCTACGAGCAGTACTTC	:CCCB?CBEB@BD<ECBCDEDE>E>CEDDDBBCDDDC@E?@D	TRBV7-8*00(169),TRBV7-2*00(153)	TRBD1*00(35)	TRBJ2-7*00(240)		430|442|467|0|12||60.0;430|442|467|0|12||60.0	13|20|36|15|22||35.0	19|39|67|22|42||100.0		NA	NA	NA	NA	NA	NA	NA	NA	NA	NA	TGTGCCAGCAGCCGAGGACAGGGCTCCTACGAGCAGTACTTC	25	NA	NA	NA	NA	NA	NA	NA	CASSRGQGSYEQYF	NA	:::::::::0:-5:12:15:-1:-4:22:22:1:42:::
BM17	74	1	0.0151515	TGTGCCAGCAGCGGAGAAGGCACTGAAGCTTTCTTT	EEECCCDCBD:ECDE<ED>DC>CABEE@CBEDEDDE	TRBV9*00(220)		TRBJ1-1*00(220)		427|440|463|0|13||65.0		24|40|68|20|36||80.0		NA	NA	NA	NA	NA	NA	NA	NA	NA	NA	TGTGCCAGCAGCGGAGAAGGCACTGAAGCTTTCTTT	25	NA	NA	NA	NA	NA	NA	NA	CASSGEGTEAFF	NA	:::::::::0:-3:13:::::20:-4:36:::
BM17	75	1	0.0151515	TGTGCCAGCAGCGGTAGTAACACTGAAGCTTTCTTT	?DDECDBEC?ECEE?EEBC9D>DECCEDCDC:BEE;	TRBV9*00(220)		TRBJ1-1*00(230)		427|440|463|0|13||65.0		22|40|68|18|36||90.0		NA	NA	NA	NA	NA	NA	NA	NA	NA	NA	TGTGCCAGCAGCGGTAGTAACACTGAAGCTTTCTTT	24	NA	NA	NA	NA	NA	NA	NA	CASSGSNTEAFF	NA	:::::::::0:-3:13:::::18:-2:36:::
BM18	3	19	0.279412	TGTGCCAGCAGACAGGGGACCCGGGAGACCCAGTACTTC	FFEFEFFEFFFEEFEFEFEFFFEFFEFEFFFFEEFFFFE	TRBV6-1*00(232),TRBV6-5*00(232),TRBV6-8*00(232),TRBV6-6*00(216)	TRBD1*00(35)	TRBJ2-5*00(215)		427|438|464|0|11||55.0;427|438|464|0|11||55.0;424|435|461|0|11||55.0;427|438|464|0|11||55.0	15|22|36|11|18||35.0	25|40|68|24|39||75.0		NA	NA	NA	NA	NA	NA	NA	NA	NA	NA	TGTGCCAGCAGACAGGGGACCCGGGAGACCCAGTACTTC	36	NA	NA	NA	NA	NA	NA	NA	CASRQGTRETQYF	NA	:::::::::0:-6:11:11:-3:-2:18:24:-5:39:::
BM18	5	14	0.205882	TGCAGTGCCCCACTCGGGGGCCCCATC	FFFEFEFFFFFEFEFFEEFFFFFFEFF	TRBV20-1*00(348.5)	TRBD1*00(30),TRBD2*00(30)	TRBJ1-2*00(150)		421|429|455|0|8||40.0	18|24|36|15|21||30.0;29|35|48|17|23||30.0	38|40|68|25|27||10.0		NA	NA	NA	NA	NA	NA	NA	NA	NA	NA	TGCAGTGCCCCACTCGGGGGCCCCATC	36	NA	NA	NA	NA	NA	NA	NA	CSAPLGGPI	NA	:::::::::0:-6:8:15:-6:0:21:25:-18:27:::
BM18	6	10	0.147059	TGTGCCAGTAGCCCAGGCGGTACCAATTTCCACGAGCAGTACTTC	FEFEFFFEEEFFEFEEEFFFEEEFEFEEFFFFFEFFFEFEFFFEE	TRBV19*00(319)		TRBJ2-7*00(210)		427|438|464|0|11||55.0		25|39|67|31|45||70.0		NA	NA	NA	NA	NA	NA	NA	NA	NA	NA	TGTGCCAGTAGCCCAGGCGGTACCAATTTCCACGAGCAGTACTTC	36	NA	NA	NA	NA	NA	NA	NA	CASSPGGTNFHEQYF	NA	:::::::::0:-6:11:::::31:-5:45:::
BM18	8	9	0.132353	TGTGCCAGCAGTTATCAGGGGGCCACTGAAGCTTTCTTT	FFEFFFFFFEFFEEFFFFFFEEEFEEEFEFFEFFFEFFF	TRBV6-5*00(243.4),TRBV6-8*00(243.4),TRBV6-1*00(233.4),TRBV6-6*00(227.4)	TRBD1*00(40)	TRBJ1-1*00(220)		427|441|464|0|14||70.0;424|438|461|0|14||70.0;427|439|464|0|12||60.0;427|441|464|0|14||70.0	16|24|36|15|23||40.0	24|40|68|23|39||80.0		NA	NA	NA	NA	NA	NA	NA	NA	NA	NA	TGTGCCAGCAGTTATCAGGGGGCCACTGAAGCTTTCTTT	36	NA	NA	NA	NA	NA	NA	NA	CASSYQGATEAFF	NA	:::::::::0:-3:14:15:-4:0:23:23:-4:39:::
BM18	11	1	0.0147059	TGTGCCATTCGGGACAGGCACCCCACAGATACGCAGTATTTT	EDEEEE9EDAEED;EDDDE:DEDEEECEEEDEDDEEEDEEEE	TRBV10-3*00(232)	TRBD1*00(45)	TRBJ2-3*00(235)		427|435|464|0|8||40.0	11|20|36|9|18||45.0	22|41|69|23|42||95.0		NA	NA	NA	NA	NA	NA	NA	NA	NA	NA	TGTGCCATTCGGGACAGGCACCCCACAGATACGCAGTATTTT	24	NA	NA	NA	NA	NA	NA	NA	CAIRDRHPTDTQYF	NA	:::::::::0:-9:8:9:1:-4:18:23:-2:42:::
BM18	12	1	0.0147059	TGTGCCAGTTGGATCAAGAACACTGAAGCTTTCTTT	DEEEDACEDEEABEEEEDCCDADECEDB@@ECEB?:	TRBV2*00(195)		TRBJ1-1*00(239)		430|438|467|0|8||40.0		17|40|68|13|36|ST20A|99.0		NA	NA	NA	NA	NA	NA	NA	NA	NA	NA	TGTGCCAGTTGGATCAAGAACACTGAAGCTTTCTTT	25	NA	NA	NA	NA	NA	NA	NA	CASWIKNTEAFF	NA	:::::::::0:-9:8:::::13:3:36:::
BM18	13	1	0.0147059	TGCAGTGCTGGCGGACTGAAAGACGGGGGCTACACCTTC	BA;DBBEABED7@DDCCDBC?D<E:BDCDDD=E=C?DE@	TRBV20-1*00(153)	TRBD2*00(25)	TRBJ1-2*00(120)		421|430|455|0|9||45.0	17|22|48|12|17||25.0	28|40|68|27|39||60.0		NA	NA	NA	NA	NA	NA	NA	NA	NA	NA	TGCAGTGCTGGCGGACTGAAAGACGGGGGCTACACCTTC	22	NA	NA	NA	NA	NA	NA	NA	CSAGGLKDGGYTF	NA	:::::::::0:-5:9:12:-1:-10:17:27:-8:39:::
BM18	14	1	0.0147059	TGTGCCACCAGTGATTCGGGTGGAGACGAGCAGTACTTC	EE9EEEEDEEEEEEEEEEEAEEEEEEEEDEEEDCEEEDE	TRBV24-1*00(303)		TRBJ2-7*00(104)		427|443|465|0|16||80.0		25|39|67|25|39||70.0		NA	NA	NA	NA	NA	NA	NA	NA	NA	NA	TGTGCCACCAGTGATTCGGGTGGAGACGAGCAGTACTTC	24	NA	NA	NA	NA	NA	NA	NA	CATSDSGGDEQYF	NA	:::::::::0:-2:16:::::25:-5:39:::
BM18	16	1	0.0147059	TGTGCCAGCAGTTTTTCGAGGGAGACGTACAATGAGCAGTTCTTC	AEE?BDBBDDECDD@BCCED@DEEAEDEABDBEDDDBDDEEABC;	TRBV27*00(173)	TRBD2*00(25)	TRBJ2-1*00(150)		427|446|464|0|19|SA441T|79.0	25|30|48|19|24||25.0	24|42|70|27|45||90.0		NA	NA	NA	NA	NA	NA	NA	NA	NA	NA	TGTGCCAGCAGTTTTTCGAGGGAGACGTACAATGAGCAGTTCTTC	26	NA	NA	NA	NA	NA	NA	NA	CASSFSRETYNEQFF	NA	:::::::::0:2:19:19:-9:-2:24:27:-4:45:::
BM18	17	1	0.0147059	TGTGCCAGCAGGAGGGGGTCCTCCGGCTACACCTTC	AEEE??BEA8EECE==EEECEDA?DEAE7>A=<DEA	TRBV28*00(210)	TRBD1*00(30),TRBD2*00(29)	TRBJ1-2*00(200)		427|438|464|0|11||55.0	17|23|36|12|18||30.0;29|38|48|15|24|SC32T|29.0	28|40|68|24|36||60.0		NA	NA	NA	NA	NA	NA	NA	NA	NA	NA	TGTGCCAGCAGGAGGGGGTCCTCCGGCTACACCTTC	22	NA	NA	NA	NA	NA	NA	NA	CASRRGSSGYTF	NA	:::::::::0:-6:11:12:-5:-1:18:24:-8:36:::
BM18	18	1	0.0147059	TGTGCCAGCAGTTTCGGGTTTTCTGGAAACACCATATATTTT	E:EEBAC>EED?E;CC=EBEEDCDCE@7EE?CEEEEEEEDEE	TRBV28*00(179)		TRBJ1-3*00(245)		427|441|464|0|14||70.0		21|42|70|21|42||105.0		NA	NA	NA	NA	NA	NA	NA	NA	NA	NA	TGTGCCAGCAGTTTCGGGTTTTCTGGAAACACCATATATTTT	22	NA	NA	NA	NA	NA	NA	NA	CASSFGFSGNTIYF	NA	:::::::::0:-3:14:::::21:-1:42:::
BM18	19	1	0.0147059	TGTGCCAGCAGTCCCGGCGGGGCCCAAGAGACCCAGTACTTC	EEAE>EEEEEEEAEEEEDEEE?EEEEEED@EEEEEEDEECEE	TRBV28*00(264)	TRBD1*00(25),TRBD2*00(25)	TRBJ2-5*00(165)		427|439|464|0|12||60.0	9|14|36|12|17||25.0;13|18|48|12|17||25.0	21|40|68|23|42||95.0		NA	NA	NA	NA	NA	NA	NA	NA	NA	NA	TGTGCCAGCAGTCCCGGCGGGGCCCAAGAGACCCAGTACTTC	29	NA	NA	NA	NA	NA	NA	NA	CASSPGGAQETQYF	NA	:::::::::0:-5:12:12:3:-10:17:23:-1:42:::
BM18	20	1	0.0147059	TGTGCCAGCAGTTTAAGGGACAGGTACTCCTACGAGCAGTACTTC	EFEFFEFFDFEEEFEEEFEEEEFFEEEEEEFEEFEEEFFEFEFEF	TRBV28*00(279)	TRBD1*00(40)	TRBJ2-7*00(235)		427|442|464|0|15||75.0	12|20|36|16|24||40.0	20|39|67|26|45||95.0		NA	NA	NA	NA	NA	NA	NA	NA	NA	NA	TGTGCCAGCAGTTTAAGGGACAGGTACTCCTACGAGCAGTACTTC	35	NA	NA	NA	NA	NA	NA	NA	CASSLRDRYSYEQYF	NA	:::::::::0:-2:15:16:0:-4:24:26:0:45:::
BM18	21	1	0.0147059	TGCAGCGTTACACCAACCGCAGACAGGGACACTGAAGCTTTCTTT	EEECEEEEE;EDEEE<EEDEEEEEEBEDEEEEEEE=7E@EEEEEE	TRBV29-1*00(268)	TRBD1*00(35)	TRBJ1-1*00(105)		421|430|455|0|9||45.0	14|21|36|21|28||35.0	23|40|68|28|45||85.0		NA	NA	NA	NA	NA	NA	NA	NA	NA	NA	TGCAGCGTTACACCAACCGCAGACAGGGACACTGAAGCTTTCTTT	22	NA	NA	NA	NA	NA	NA	NA	CSVTPTADRDTEAFF	NA	:::::::::0:-5:9:21:-2:-3:28:28:-3:45:::
BM18	22	1	0.0147059	TGTGCCAGCAGTGAAATCGGCGGGAACTACAATGAGCAGTTCTTC	BDBD?=ECEE>DDDE>DACB;DECEEEEEEEEEBEDDEDCDEEEE	TRBV6-1*00(165),TRBV6-4*00(160),TRBV6-5*00(150),TRBV6-6*00(150),TRBV10-3*00(144)	TRBD2*00(30)	TRBJ2-1*00(235)		427|442|464|0|15||75.0;427|441|464|0|14||70.0;427|439|464|0|12||60.0;427|439|464|0|12||60.0;427|441|464|0|14|ST434G|54.0	23|29|48|19|25||30.0	23|42|70|26|45||95.0		NA	NA	NA	NA	NA	NA	NA	NA	NA	NA	TGTGCCAGCAGTGAAATCGGCGGGAACTACAATGAGCAGTTCTTC	26	NA	NA	NA	NA	NA	NA	NA	CASSEIGGNYNEQFF	NA	:::::::::0:-2:15:19:-7:-3:25:26:-3:45:::
BM18	23	1	0.0147059	TGTGCCAGCAGCCATCTAGGGAATGAGCAGTTCTTC	DEDE:EEEDBCDDAEEEEEEEEEEEBEDEBE@EEBE	TRBV6-2*00(190),TRBV6-3*00(190),TRBV6-1*00(174),TRBV6-5*00(174),TRBV6-6*00(174)		TRBJ2-1*00(215)		427|438|464|0|11||55.0;427|438|464|0|11||55.0;427|438|464|0|11||55.0;427|438|464|0|11||55.0;427|438|464|0|11||55.0		27|42|70|21|36||75.0		NA	NA	NA	NA	NA	NA	NA	NA	NA	NA	TGTGCCAGCAGCCATCTAGGGAATGAGCAGTTCTTC	25	NA	NA	NA	NA	NA	NA	NA	CASSHLGNEQFF	NA	:::::::::0:-6:11:::::21:-7:36:::
BM18	24	1	0.0147059	TGTGCCAGCAGTTTGAGACTAGCGGGAGGCAATGAGCAGTTCTTC	DD?CBE?AE@EACAEDD?E=>DEEDDDEDEDDEDCDCBB7=DB=A	TRBV6-2*00(155),TRBV6-3*00(155)	TRBD2*00(65)	TRBJ2-1*00(220)		427|440|464|0|13||65.0;427|440|464|0|13||65.0	18|31|48|16|29||65.0	26|42|70|29|45||80.0		NA	NA	NA	NA	NA	NA	NA	NA	NA	NA	TGTGCCAGCAGTTTGAGACTAGCGGGAGGCAATGAGCAGTTCTTC	22	NA	NA	NA	NA	NA	NA	NA	CASSLRLAGGNEQFF	NA	:::::::::0:-4:13:16:-2:-1:29:29:-6:45:::
BM18	25	1	0.0147059	TGTGCCAGCAGTCCTTTAAGACGGGACACCGGGGAGCTGTTTTTT	EDDCD6ECAEBBADEDEBEBB?EBE=C<@DDDBD@ADDCEEE>ED	TRBV6-2*00(170),TRBV6-3*00(170),TRBV6-1*00(154),TRBV6-5*00(154),TRBV6-6*00(154)		TRBJ2-2*00(224)		427|439|464|0|12||60.0;427|439|464|0|12||60.0;427|439|464|0|12||60.0;427|439|464|0|12||60.0;427|439|464|0|12||60.0		23|43|71|25|45||100.0		NA	NA	NA	NA	NA	NA	NA	NA	NA	NA	TGTGCCAGCAGTCCTTTAAGACGGGACACCGGGGAGCTGTTTTTT	21	NA	NA	NA	NA	NA	NA	NA	CASSPLRRDTGELFF	NA	:::::::::0:-5:12:::::25:-3:45:::
BM18	26	1	0.0147059	TGTGCCAGCAGTCAAGGGACAGGTGGATCAGATACGCAGTATTTT	DE@EDDFEEEEEEEEEEDEDEEE>EE8DECEEB<EBFEEEEEEDD	TRBV6-2*00(237),TRBV6-3*00(237),TRBV6-1*00(209)	TRBD1*00(40)	TRBJ2-3*00(225)		427|439|464|0|12||60.0;427|439|464|0|12||60.0;427|443|464|0|16|SG439C|64.0	12|20|36|15|23||40.0	24|41|69|28|45||85.0		NA	NA	NA	NA	NA	NA	NA	NA	NA	NA	TGTGCCAGCAGTCAAGGGACAGGTGGATCAGATACGCAGTATTTT	23	NA	NA	NA	NA	NA	NA	NA	CASSQGTGGSDTQYF	NA	:::::::::0:-5:12:15:0:-4:23:28:-4:45:::
BM18	28	1	0.0147059	TGTGCCAGCAGCCCTAGCAGGAGCCTCTACGAGCAGTACTTC	EEEDEEFDEEEEEEEEEEE<EEEEEEEEEEEFEEEEEEECAE	TRBV7-2*00(327),TRBV7-8*00(317),TRBV7-3*00(285)	TRBD2*00(25)	TRBJ2-7*00(148)		430|442|467|0|12||60.0;430|442|467|0|12||60.0;430|442|467|0|12||60.0	20|25|48|13|18||25.0	15|39|67|18|42|ST21CSC22T|88.0		NA	NA	NA	NA	NA	NA	NA	NA	NA	NA	TGTGCCAGCAGCCCTAGCAGGAGCCTCTACGAGCAGTACTTC	27	NA	NA	NA	NA	NA	NA	NA	CASSPSRSLYEQYF	NA	:::::::::0:-5:12:13:-4:-7:18:18:5:42:::
BM19	162	6	0.109091	TGTGCCAGCAGTTTCGGGTTTTCTGGAAACACCATATATTTT	EEEDDEECDCDDEEEAEEEDEDECEEEEEDEEEDEEEDEEEE	TRBV28*00(189.7)		TRBJ1-3*00(245)		427|441|464|0|14||70.0		21|42|70|21|42||105.0		NA	NA	NA	NA	NA	NA	NA	NA	NA	NA	TGTGCCAGCAGTTTCGGGTTTTCTGGAAACACCATATATTTT	32	NA	NA	NA	NA	NA	NA	NA	CASSFGFSGNTIYF	NA	:::::::::0:-3:14:::::21:-1:42:::
BM19	537	3	0.0545455	TGTGCCAGCTCCCTGGACAGGGTAAATCAGCCCCAGCATTTT	EEEEEEEFEEEEEEEEDEEEEEEEEEEEEEDEEEEEEEEEEE	TRBV18*00(125)	TRBD1*00(40)	TRBJ1-5*00(225)	TRBC1*00(373),TRBC2*00(341)	430|441|467|0|11||55.0	13|21|36|14|22||40.0	24|42|70|24|42||90.0	;	NA	NA	NA	NA	NA	NA	NA	NA	NA	NA	TGTGCCAGCTCCCTGGACAGGGTAAATCAGCCCCAGCATTTT	35	NA	NA	NA	NA	NA	NA	NA	CASSLDRVNQPQHF	NA	:::::::::0:-6:11:14:-1:-3:22:24:-4:42:::
BM19	538	3	0.0545455	TGTGCCAGCAGTTACTCTCAGATAGGCGAGCAGTACTTC	FEEEEEEEEFEEEEFEEFEEEEEEEEEEEEFFEEEEEFE	TRBV6-6*00(221),TRBV6-5*00(205),TRBV6-8*00(205)		TRBJ2-7*00(205)	TRBC2*00(174.7)	427|444|464|0|17||85.0;427|444|464|0|17||85.0;424|441|461|0|17||85.0		26|39|67|26|39||65.0		NA	NA	NA	NA	NA	NA	NA	NA	NA	NA	TGTGCCAGCAGTTACTCTCAGATAGGCGAGCAGTACTTC	36	NA	NA	NA	NA	NA	NA	NA	CASSYSQIGEQYF	NA	:::::::::0:0:17:::::26:-6:39:::
BM19	898	2	0.0363636	TGTGCCAGCAGTTATGGGGGGCTTGAAGCTTTCTTT	EEEEECEEDEEEADEEDEEEAEEEBEEEEEEEEEEE	TRBV12-3*00(239),TRBV12-4*00(239)	TRBD1*00(30)	TRBJ1-1*00(182.5)		430|443|467|0|13||65.0;430|443|467|0|13||65.0	18|24|36|16|22||30.0	27|40|68|23|36||65.0		NA	NA	NA	NA	NA	NA	NA	NA	NA	NA	TGTGCCAGCAGTTATGGGGGGCTTGAAGCTTTCTTT	32	NA	NA	NA	NA	NA	NA	NA	CASSYGGLEAFF	NA	:::::::::0:-4:13:16:-6:0:22:23:-7:36:::
BM19	899	2	0.0363636	TGTGCCAGCAGCCAAGACCTAGCGGGAGTGAGAGAGACCCAGTACTTC	EEEEEEEDEDEEEEDEEEEEEEEEEEDEAEEEEEEEEEEEDEEEDEEE	TRBV14*00(207)	TRBD2*00(50)	TRBJ2-5*00(150)	TRBC1*00(372),TRBC2*00(372)	430|447|467|0|17||85.0	20|30|48|18|28||50.0	24|40|68|32|48||80.0	;	NA	NA	NA	NA	NA	NA	NA	NA	NA	NA	TGTGCCAGCAGCCAAGACCTAGCGGGAGTGAGAGAGACCCAGTACTTC	32	NA	NA	NA	NA	NA	NA	NA	CASSQDLAGVRETQYF	NA	:::::::::0:0:17:18:-4:-2:28:32:-4:48:::
BM19	900	2	0.0363636	TGTGCCAGCAGTGTTTCCGATTCGTTAGAAAAACTGTTTTTT	EFEEEEEEEEEEEEFFEEEEEEFEEFFEEFEEFEEEEFEFEE	TRBV2*00(324)		TRBJ1-4*00(205)		430|443|467|0|13||65.0		28|43|71|27|42||75.0		NA	NA	NA	NA	NA	NA	NA	NA	NA	NA	TGTGCCAGCAGTGTTTCCGATTCGTTAGAAAAACTGTTTTTT	36	NA	NA	NA	NA	NA	NA	NA	CASSVSDSLEKLFF	NA	:::::::::0:-4:13:::::27:-8:42:::
BM19	901	2	0.0363636	TGTGCCAGCAGTAACCCGACAGGGGAAGAGACCCCGTACTTC	E@EB7CEEDDEC@ECE<EBEEEEE@=ADE<AED;EDE7EDED	TRBV28*00(210)	TRBD1*00(40)	TRBJ2-5*00(209)		427|439|464|0|12||60.0	14|22|36|17|25||40.0	23|40|68|25|42|SA32C|69.0		NA	NA	NA	NA	NA	NA	NA	NA	NA	NA	TGTGCCAGCAGTAACCCGACAGGGGAAGAGACCCCGTACTTC	22	NA	NA	NA	NA	NA	NA	NA	CASSNPTGEETPYF	NA	:::::::::0:-5:12:17:-2:-2:25:25:-3:42:::
BM19	902	2	0.0363636	TGTGCCAGCAGGCCCACTGGTGGTGCCATGAACACTGAAGCTTTCTTT	EEEEEEEEEEEEEEEEEEEEEEEEEEDEEEEEEEEEEEEEEEFEEEEE	TRBV5-4*00(53),TRBV5-2*00(50.5)		TRBJ1-1*00(250)		427|438|463|0|11||55.0;416|426|452|0|10||50.0		18|40|68|26|48||110.0		NA	NA	NA	NA	NA	NA	NA	NA	NA	NA	TGTGCCAGCAGGCCCACTGGTGGTGCCATGAACACTGAAGCTTTCTTT	35	NA	NA	NA	NA	NA	NA	NA	CASRPTGGAMNTEAFF	NA	:::::::::0:-5:11:::::26:2:48:::
BM19	903	2	0.0363636	TGTGCCAGCAGCTCCGAAGTCACCGGGGAGCTGTTTTTT	FFFEEFEFEEFEEEEEFEFEEEFFEEFEEFEFFEEEEFF	TRBV5-4*00(194),TRBV5-8*00(178)		TRBJ2-2*00(235)		427|440|463|0|13||65.0;427|440|463|0|13||65.0		24|43|71|20|39||95.0		NA	NA	NA	NA	NA	NA	NA	NA	NA	NA	TGTGCCAGCAGCTCCGAAGTCACCGGGGAGCTGTTTTTT	36	NA	NA	NA	NA	NA	NA	NA	CASSSEVTGELFF	NA	:::::::::0:-3:13:::::20:-4:39:::
BM19	904	2	0.0363636	TGTGCCAGCAGCTTGACGAATGAGCAGTTCTTC	FFEEEEEEEEECEEEEEEEEEEEEEEEEEFEEE	TRBV5-6*00(131),TRBV5-4*00(116),TRBV5-7*00(116),TRBV5-8*00(116),TRBV5-5*00(115)		TRBJ2-1*00(215)	TRBC2*00(191)	427|442|463|0|15||75.0;427|442|463|0|15||75.0;427|442|463|0|15||75.0;427|442|463|0|15||75.0;427|442|463|0|15||75.0		27|42|70|18|33||75.0		NA	NA	NA	NA	NA	NA	NA	NA	NA	NA	TGTGCCAGCAGCTTGACGAATGAGCAGTTCTTC	34	NA	NA	NA	NA	NA	NA	NA	CASSLTNEQFF	NA	:::::::::0:-1:15:::::18:-7:33:::
BM19	905	2	0.0363636	TGTGCCAGCAGTGGCAGCAACACTGAAGCTTTCTTT	D?DD?DEE?CBD@BAD;EADDEACCED@@E?DBAED	TRBV9*00(210)		TRBJ1-1*00(230)		427|438|463|0|11||55.0		22|40|68|18|36||90.0		NA	NA	NA	NA	NA	NA	NA	NA	NA	NA	TGTGCCAGCAGTGGCAGCAACACTGAAGCTTTCTTT	26	NA	NA	NA	NA	NA	NA	NA	CASSGSNTEAFF	NA	:::::::::0:-5:11:::::18:-2:36:::
BM19	1323	1	0.0181818	TGTGCCAGCAGCCTAGGAGGGAAGAATTCACCCCTCCACTTT	EEEEEEEEEEEEECEFEEEEEEEEEEECEEEEDEE7EEEEEE	TRBV12-3*00(513),TRBV12-4*00(513)	TRBD2*00(30)	TRBJ1-6*00(214)		430|441|467|0|11||55.0;430|441|467|0|11||55.0	26|32|48|15|21||30.0	27|45|73|24|42||90.0		NA	NA	NA	NA	NA	NA	NA	NA	NA	NA	TGTGCCAGCAGCCTAGGAGGGAAGAATTCACCCCTCCACTTT	22	NA	NA	NA	NA	NA	NA	NA	CASSLGGKNSPLHF	NA	:::::::::0:-6:11:15:-10:0:21:24:-7:42:::
BM19	1324	1	0.0181818	TGTGCCAGCAACGCGGGTTACAATGAGCAGTTCTTC	E>E<AEDDE=BEE?EEEEDEEDAEEDDEEEDE?EBE	TRBV12-3*00(185),TRBV12-4*00(185)	TRBD2*00(25)	TRBJ2-1*00(230)		430|440|467|0|10||50.0;430|440|467|0|10||50.0	23|28|48|12|17||25.0	24|42|70|18|36||90.0		NA	NA	NA	NA	NA	NA	NA	NA	NA	NA	TGTGCCAGCAACGCGGGTTACAATGAGCAGTTCTTC	27	NA	NA	NA	NA	NA	NA	NA	CASNAGYNEQFF	NA	:::::::::0:-7:10:12:-7:-4:17:18:-4:36:::
BM19	1325	1	0.0181818	TGTGCCAGCAGTTTGACTGGACGGGGCTACGAGCAGTACTTC	DDEB=;7@B>DEEEECDEED;EEEED@CDEEEEEEEEEDEDD	TRBV12-3*00(195),TRBV12-4*00(195)		TRBJ2-7*00(220)		430|444|467|0|14||70.0;430|444|467|0|14||70.0		23|39|67|26|42||80.0		NA	NA	NA	NA	NA	NA	NA	NA	NA	NA	TGTGCCAGCAGTTTGACTGGACGGGGCTACGAGCAGTACTTC	22	NA	NA	NA	NA	NA	NA	NA	CASSLTGRGYEQYF	NA	:::::::::0:-3:14:::::26:-3:42:::
BM19	1327	1	0.0181818	TGTGCCACCAGCGAAGCCGGGACAGGGTCTTACGAGCAGTACTTC	EEEDFEEEEEEEEEFFEEEEEEEFFEFEEFEEEEEEEEFEEEEEE	TRBV15*00(257)	TRBD1*00(55)	TRBJ2-7*00(215)		427|439|464|0|12||60.0	10|21|36|16|27||55.0	24|39|67|30|45||75.0		NA	NA	NA	NA	NA	NA	NA	NA	NA	NA	TGTGCCACCAGCGAAGCCGGGACAGGGTCTTACGAGCAGTACTTC	35	NA	NA	NA	NA	NA	NA	NA	CATSEAGTGSYEQYF	NA	:::::::::0:-5:12:16:2:-3:27:30:-4:45:::
BM19	1328	1	0.0181818	TGTGCCAGCAGCCAACGGGAAGCCTACGAGCAGTACTTC	E@DB;AD?EE9<EDEC;DADBBDEECEDCEEDDEEEEEE	TRBV16*00(215)	TRBD1*00(25),TRBD2*00(25)	TRBJ2-7*00(225)		430|445|467|0|15||75.0	11|16|36|15|20||25.0;15|20|48|15|20||25.0	22|39|67|22|39||85.0		NA	NA	NA	NA	NA	NA	NA	NA	NA	NA	TGTGCCAGCAGCCAACGGGAAGCCTACGAGCAGTACTTC	24	NA	NA	NA	NA	NA	NA	NA	CASSQREAYEQYF	NA	:::::::::0:-2:15:15:1:-8:20:22:-2:39:::
BM19	1329	1	0.0181818	TGTGCCAGTAGTTCAGGGGGAGCAACAGATACGCAGTATTTT	ED;EDDDCB@DEEDDEE7EE?E=EAE@DE;EE@EEEB?BEEE	TRBV19*00(324)	TRBD1*00(35)	TRBJ2-3*00(100)		427|439|464|0|12||60.0	16|23|36|13|20||35.0	23|41|69|24|42||90.0		NA	NA	NA	NA	NA	NA	NA	NA	NA	NA	TGTGCCAGTAGTTCAGGGGGAGCAACAGATACGCAGTATTTT	22	NA	NA	NA	NA	NA	NA	NA	CASSSGGATDTQYF	NA	:::::::::0:-5:12:13:-4:-1:20:24:-3:42:::
BM19	1330	1	0.0181818	TGTGCCAGTAGTATAGCCGGGAGGGGGCTTGGTGAGCAGTACTTC	A?BBD;CDEBBBCD@CDDEEE><DDBDDD>CECDACEEDDDD>>A	TRBV19*00(190)	TRBD2*00(40),TRBD1*00(35)	TRBJ2-7*00(120),TRBJ1-1*00(110)		427|443|464|0|16||80.0	24|32|48|17|25||40.0;17|24|36|21|28||35.0	27|39|67|33|45||60.0;36|40|68|41|45|ST39C|4.0		NA	NA	NA	NA	NA	NA	NA	NA	NA	NA	TGTGCCAGTAGTATAGCCGGGAGGGGGCTTGGTGAGCAGTACTTC	26	NA	NA	NA	NA	NA	NA	NA	CASSIAGRGLGEQYF	NA	:::::::::0:-1:16:17:-8:0:25:33:-7:45:::
BM19	1332	1	0.0181818	TGCAGTGCTAGACAAAAGACAGGTTTGGTGAACACCGAAGCTTTCTTT	D?A?DD@EDDEB@EDEE>=ED=ED?DDEE?DDDCEB9EEBBDEEDDED	TRBV20-1*00(155)	TRBD1*00(30)	TRBJ1-1*00(224)		421|433|455|0|12||60.0	14|20|36|17|23||30.0	20|40|68|28|48|ST27C|84.0		NA	NA	NA	NA	NA	NA	NA	NA	NA	NA	TGCAGTGCTAGACAAAAGACAGGTTTGGTGAACACCGAAGCTTTCTTT	24	NA	NA	NA	NA	NA	NA	NA	CSARQKTGLVNTEAFF	NA	:::::::::0:-2:12:17:-2:-4:23:28:0:48:::
BM19	1333	1	0.0181818	TGCAGTGCTGTCTGGACTAGCGGGACCTATTCCTCCTACAATGAGCAGTTCTTC	EEEDDEEEDE;EEEEEEEEEEDEECEEEE>EFE6AEED;EEEEEEEEED;EDEE	TRBV20-1*00(383)	TRBD2*00(60)	TRBJ2-1*00(250)		421|430|455|0|9||45.0	17|29|48|13|25||60.0	20|42|70|32|54||110.0		NA	NA	NA	NA	NA	NA	NA	NA	NA	NA	TGCAGTGCTGTCTGGACTAGCGGGACCTATTCCTCCTACAATGAGCAGTTCTTC	21	NA	NA	NA	NA	NA	NA	NA	CSAVWTSGTYSSYNEQFF	NA	:::::::::0:-5:9:13:-1:-3:25:32:0:54:::
BM19	1335	1	0.0181818	TGTGCCAGCAGTCCCCCCATGGACAGGGGAGTCGGGGAGCTGTTTTTT	EDE7BEEEECA?EEDD?D=EED6EEEEEEBDDDEEEEEDEECEEEEEE	TRBV27*00(155)	TRBD1*00(45)	TRBJ2-2*00(220)		427|439|464|0|12||60.0	13|22|36|20|29||45.0	27|43|71|32|48||80.0		NA	NA	NA	NA	NA	NA	NA	NA	NA	NA	TGTGCCAGCAGTCCCCCCATGGACAGGGGAGTCGGGGAGCTGTTTTTT	21	NA	NA	NA	NA	NA	NA	NA	CASSPPMDRGVGELFF	NA	:::::::::0:-5:12:20:-1:-2:29:32:-7:48:::
BM19	1336	1	0.0181818	TGTGCCACCCTGTATTCGGACCTGATGAACACTGAAGCTTTCTTT	EEFEEEEFEEEEEEFEEFEEEEEEEEEEEEEDFEFEEEEEEEEEE	TRBV28*00(329)	TRBD1*00(30)	TRBJ1-1*00(100)		427|434|464|0|7||35.0	3|9|36|7|13||30.0	19|40|68|24|45||105.0		NA	NA	NA	NA	NA	NA	NA	NA	NA	NA	TGTGCCACCCTGTATTCGGACCTGATGAACACTGAAGCTTTCTTT	35	NA	NA	NA	NA	NA	NA	NA	CATLYSDLMNTEAFF	NA	:::::::::0:-10:7:7:9:-15:13:24:1:45:::
BM19	1338	1	0.0181818	TGTGCCAGCAGTTTAAGGGCGGGGCGCCTAGGGAATGAAAAACTGTTTTTT	FEEEEEBEEEFFEDEFEEAEEEEEEEEEEEEEEEEEEEEFEEEFEEEEEEF	TRBV28*00(279)	TRBD1*00(40)	TRBJ1-4*00(220)		427|442|464|0|15||75.0	19|27|36|20|28||40.0	25|43|71|33|51||90.0		NA	NA	NA	NA	NA	NA	NA	NA	NA	NA	TGTGCCAGCAGTTTAAGGGCGGGGCGCCTAGGGAATGAAAAACTGTTTTTT	32	NA	NA	NA	NA	NA	NA	NA	CASSLRAGRLGNEKLFF	NA	:::::::::0:-2:15:20:-7:3:28:33:-5:51:::
BM19	1339	1	0.0181818	TGTGCCAGCAGACCCGGGACAGGGGTTGGTTCACCCCTCCACTTT	DDEDEEEEDBECEEEEDE>DEDECD@>EEEED>EDDEEEEE>DEE	TRBV28*00(259)	TRBD1*00(65)	TRBJ1-6*00(220)		427|438|464|0|11||55.0	9|22|36|12|25||65.0	29|45|73|29|45||80.0		NA	NA	NA	NA	NA	NA	NA	NA	NA	NA	TGTGCCAGCAGACCCGGGACAGGGGTTGGTTCACCCCTCCACTTT	29	NA	NA	NA	NA	NA	NA	NA	CASRPGTGVGSPLHF	NA	:::::::::0:-6:11:12:3:-2:25:29:-9:45:::
BM19	1340	1	0.0181818	TGTGCCAGCAGTCTCCACGGGTCCTCTGGGGCCAACGTCCTGACTTTC	EEEEEEEEEEE>FEEEEEEEDEEEEEEFEEEEEEDEEEEEFEEEEEEE	TRBV28*00(264)		TRBJ2-6*00(233)		427|439|464|0|12||60.0		20|45|73|23|48||125.0		NA	NA	NA	NA	NA	NA	NA	NA	NA	NA	TGTGCCAGCAGTCTCCACGGGTCCTCTGGGGCCAACGTCCTGACTTTC	29	NA	NA	NA	NA	NA	NA	NA	CASSLHGSSGANVLTF	NA	:::::::::0:-5:12:::::23:0:48:::
BM19	1341	1	0.0181818	TGCAGCGTTGTCCCGGTCGGACGGTCAAACACTGAAGCTTTCTTT	@DE9:BD6CEABEC?@6CE?A@DE<DA;DE?BDDE:?EDDCEDBD	TRBV29-1*00(160)	TRBD1*00(30),TRBD2*00(30)	TRBJ1-1*00(230)		421|431|455|0|10||50.0	8|14|36|10|16||30.0;12|18|48|10|16||30.0	22|40|68|27|45||90.0		NA	NA	NA	NA	NA	NA	NA	NA	NA	NA	TGCAGCGTTGTCCCGGTCGGACGGTCAAACACTGAAGCTTTCTTT	21	NA	NA	NA	NA	NA	NA	NA	CSVVPVGRSNTEAFF	NA	:::::::::0:-4:10:10:4:-10:16:27:-2:45:::
BM19	1343	1	0.0181818	TGTGCCTGGAGCTCGACGGGGTGGGGATCACCCCTCCACTTT	EE=CD=DEEDE=@EEECEFEEEEEEEEDEEEEEEBBEDEEDE	TRBV30*00(573)		TRBJ1-6*00(215)		421|432|455|0|11||55.0		30|45|73|27|42||75.0		NA	NA	NA	NA	NA	NA	NA	NA	NA	NA	TGTGCCTGGAGCTCGACGGGGTGGGGATCACCCCTCCACTTT	28	NA	NA	NA	NA	NA	NA	NA	CAWSSTGWGSPLHF	NA	:::::::::0:-3:11:::::27:-10:42:::
BM19	1344	1	0.0181818	TGCGCCAGCAGCTTGGGGACAGTTTCCTACGAGCAGTACTTC	EEEDEDEDEEEEEEEEDDEEEFEEDED@EEEEDECE=AED>@	TRBV5-1*00(413)	TRBD1*00(30)	TRBJ2-7*00(230)		427|443|463|0|16||80.0	13|19|36|16|22||30.0	21|39|67|24|42||90.0		NA	NA	NA	NA	NA	NA	NA	NA	NA	NA	TGCGCCAGCAGCTTGGGGACAGTTTCCTACGAGCAGTACTTC	28	NA	NA	NA	NA	NA	NA	NA	CASSLGTVSYEQYF	NA	:::::::::0:0:16:16:-1:-5:22:24:-1:42:::
BM19	1345	1	0.0181818	TGTGCCAGCAGTGAAGCCGGGGACAGGGATTCACCCCTCCACTTT	DDECEEEEEEDEEDEA@=CEEEEECEEEDE@EEEEEEEEEEEEEE	TRBV6-1*00(195),TRBV6-5*00(170),TRBV6-6*00(170)	TRBD1*00(45)	TRBJ1-6*00(209)		427|444|464|0|17||85.0;427|439|464|0|12||60.0;427|439|464|0|12||60.0	12|21|36|19|28||45.0	28|45|73|28|45||85.0		NA	NA	NA	NA	NA	NA	NA	NA	NA	NA	TGTGCCAGCAGTGAAGCCGGGGACAGGGATTCACCCCTCCACTTT	28	NA	NA	NA	NA	NA	NA	NA	CASSEAGDRDSPLHF	NA	:::::::::0:0:17:19:0:-3:28:28:-8:45:::
BM19	1346	1	0.0181818	TGTGCCAGCAGTGTCCGTCGGACAGGGCCCAAGGGTTCACCCCTCCACTTT	EEEEBEEEEEEDEEEEEDEEECEDEEEEEEEEEEEEEE@EFEEEEEEEEEE	TRBV6-1*00(242),TRBV6-5*00(237),TRBV6-8*00(237),TRBV6-6*00(221)	TRBD1*00(40),TRBD2*00(35)	TRBJ1-6*00(220)		427|440|464|0|13||65.0;427|439|464|0|12||60.0;424|436|461|0|12||60.0;427|439|464|0|12||60.0	13|21|36|19|27||40.0;28|35|48|23|30||35.0	29|45|73|35|51||80.0		NA	NA	NA	NA	NA	NA	NA	NA	NA	NA	TGTGCCAGCAGTGTCCGTCGGACAGGGCCCAAGGGTTCACCCCTCCACTTT	31	NA	NA	NA	NA	NA	NA	NA	CASSVRRTGPKGSPLHF	NA	:::::::::0:-4:13:19:-1:-3:27:35:-9:51:::
BM19	1347	1	0.0181818	TGTGCCAGCAGTGAAGGATTGGGCAACTATAATTCACCCCTCCACTTT	EEEEDEEEEEEEEDEEE9EEDEEEDEEE?ECFEE>EEEE?????????	TRBV6-1*00(247)		TRBJ1-6*00(185)	TRBC1*00(295),TRBC2*00(263)	427|443|464|0|16||80.0		23|45|73|26|48||110.0	;	NA	NA	NA	NA	NA	NA	NA	NA	NA	NA	TGTGCCAGCAGTGAAGGATTGGGCAACTATAATTCACCCCTCCACTTT	24	NA	NA	NA	NA	NA	NA	NA	CASSEGLGNYNSPLHF	NA	:::::::::0:-1:16:::::26:-3:48:::
BM19	1348	1	0.0181818	TGTGCCAGCAGTTACTCGAGGCTAGCGGTTATCTACGAGCAGTACTTC	ECEEEDEDBEEEEE@E8EEDEDEEEEEEEEDEEEDDEEEEEEEEEEEE	TRBV6-2*00(195),TRBV6-3*00(195),TRBV6-5*00(179),TRBV6-6*00(179)	TRBD2*00(35)	TRBJ2-7*00(220)		427|447|464|0|20||100.0;427|447|464|0|20||100.0;427|447|464|0|20||100.0;427|447|464|0|20||100.0	20|27|48|21|28||35.0	23|39|67|32|48||80.0		NA	NA	NA	NA	NA	NA	NA	NA	NA	NA	TGTGCCAGCAGTTACTCGAGGCTAGCGGTTATCTACGAGCAGTACTTC	23	NA	NA	NA	NA	NA	NA	NA	CASSYSRLAVIYEQYF	NA	:::::::::0:3:20:21:-4:-5:28:32:-3:48:::
BM19	1349	1	0.0181818	TGTGCCAGCAGTGACCACTCTTTATCGAATGAGCAGTTCTTC	EDEEEEEEEEEE@;EFEEEEEEEEEEEEEEDEEEEEEEEEDE	TRBV6-4*00(180),TRBV6-1*00(159)		TRBJ2-1*00(215)		427|442|464|0|15||75.0;427|441|464|0|14||70.0		27|42|70|27|42||75.0		NA	NA	NA	NA	NA	NA	NA	NA	NA	NA	TGTGCCAGCAGTGACCACTCTTTATCGAATGAGCAGTTCTTC	26	NA	NA	NA	NA	NA	NA	NA	CASSDHSLSNEQFF	NA	:::::::::0:-2:15:::::27:-7:42:::
BM19	1350	1	0.0181818	TGTGCCAGTGGACAGGGAAGAGGATATGGCTACACCTTC	EEEEDDEDDEEEEDEEEEEEEEE?EDEEEEA=EDEECDE	TRBV6-1*00(180),TRBV6-5*00(180),TRBV6-6*00(180),TRBV6-8*00(164)	TRBD1*00(40)	TRBJ1-2*00(215)		427|435|464|0|8||40.0;427|435|464|0|8||40.0;427|435|464|0|8||40.0;424|432|461|0|8||40.0	13|21|36|9|17||40.0	25|40|68|24|39||75.0		NA	NA	NA	NA	NA	NA	NA	NA	NA	NA	TGTGCCAGTGGACAGGGAAGAGGATATGGCTACACCTTC	28	NA	NA	NA	NA	NA	NA	NA	CASGQGRGYGYTF	NA	:::::::::0:-9:8:9:-1:-3:17:24:-5:39:::
BM19	1351	1	0.0181818	TGTGCTAGCAGTTACCTGGGCCTCGGCGGTAATGAAAAACTGTTTTTT	>DD87D><?>@BD><>@@=DE???BB=DA;>79BAC@@=BE?C=C@;D	TRBV6-5*00(189),TRBV6-6*00(189),TRBV6-1*00(174),TRBV6-2*00(173),TRBV6-3*00(173)	TRBD2*00(25)	TRBJ1-4*00(225)		427|442|464|0|15|SC432T|59.0;427|442|464|0|15|SC432T|59.0;427|439|464|0|12|SC432T|44.0;427|442|464|0|15|SC432T|59.0;427|442|464|0|15|SC432T|59.0	29|34|48|17|22||25.0	24|43|71|29|48||95.0		NA	NA	NA	NA	NA	NA	NA	NA	NA	NA	TGTGCTAGCAGTTACCTGGGCCTCGGCGGTAATGAAAAACTGTTTTTT	22	NA	NA	NA	NA	NA	NA	NA	CASSYLGLGGNEKLFF	NA	:::::::::0:-2:15:17:-13:2:22:29:-4:48:::
BM19	1353	1	0.0181818	TGTGCCAGCAGGCGGGACAGGGGTTTGTACGAGCAGTACTTC	EEEBCDA:D<:CBCD>@EB7C@DD;EEB@A@EAEDED@E@DC	TRBV6-1*00(164),TRBV6-4*00(164),TRBV6-5*00(164),TRBV6-6*00(164),TRBV6-2*00(148)	TRBD1*00(55)	TRBJ2-7*00(215)		427|438|464|0|11||55.0;427|438|464|0|11||55.0;427|438|464|0|11||55.0;427|438|464|0|11||55.0;427|438|464|0|11||55.0	11|22|36|12|23||55.0	24|39|67|27|42||75.0		NA	NA	NA	NA	NA	NA	NA	NA	NA	NA	TGTGCCAGCAGGCGGGACAGGGGTTTGTACGAGCAGTACTTC	22	NA	NA	NA	NA	NA	NA	NA	CASRRDRGLYEQYF	NA	:::::::::0:-6:11:12:1:-2:23:27:-4:42:::
BM19	1354	1	0.0181818	TGTGCCAGCAGTCCCGGGTATTCCAATCACTACGAGCAGTACTTC	EEEDEEEEEEFEEEEEEEEEEEEEEEEEEEEEEDEEEFEDEEEEE	TRBV6-1*00(221),TRBV6-9*00(221),TRBV6-6*00(205),TRBV6-2*00(195),TRBV6-3*00(195)	TRBD1*00(30),TRBD2*00(30)	TRBJ2-7*00(220)		427|439|464|0|12||60.0;427|439|464|0|12||60.0;427|439|464|0|12||60.0;427|439|464|0|12||60.0;427|439|464|0|12||60.0	9|15|36|12|18||30.0;13|19|48|12|18||30.0	23|39|67|29|45||80.0		NA	NA	NA	NA	NA	NA	NA	NA	NA	NA	TGTGCCAGCAGTCCCGGGTATTCCAATCACTACGAGCAGTACTTC	35	NA	NA	NA	NA	NA	NA	NA	CASSPGYSNHYEQYF	NA	:::::::::0:-5:12:12:3:-9:18:29:-3:45:::
BM19	1355	1	0.0181818	TGTGCCAGCAGCCCAGCGGGACAGGCATTGGAGCAGTACTTC	EEEEEDAEDEEEEEEEDEEBEDDECDD?EEEDDCECEEEEED	TRBV7-6*00(185),TRBV7-7*00(169)	TRBD1*00(45)	TRBJ2-7*00(184)		430|442|467|0|12||60.0;430|442|467|0|12||60.0	11|20|36|16|25||45.0	27|39|67|30|42||60.0		NA	NA	NA	NA	NA	NA	NA	NA	NA	NA	TGTGCCAGCAGCCCAGCGGGACAGGCATTGGAGCAGTACTTC	30	NA	NA	NA	NA	NA	NA	NA	CASSPAGQALEQYF	NA	:::::::::0:-5:12:16:1:-4:25:30:-7:42:::
BM20	19	24	0.190476	TGCGCCAGCAGTCGGGACAGCGCCTACAATGAGCAGTTCTTC	EEEFFFEEEEEEEFEEEFEFFEEEEEEFEFEEEEFEFEEEEE	TRBV4-3*00(477.3),TRBV4-2*00(461.3)	TRBD1*00(30),TRBD2*00(30)	TRBJ2-1*00(244)		427|438|464|0|11||55.0;427|438|464|0|11|ST429C|39.0	11|17|36|12|18||30.0;15|21|48|12|18||30.0	18|42|70|18|42|ST21G|104.0		NA	NA	NA	NA	NA	NA	NA	NA	NA	NA	TGCGCCAGCAGTCGGGACAGCGCCTACAATGAGCAGTTCTTC	36	NA	NA	NA	NA	NA	NA	NA	CASSRDSAYNEQFF	NA	:::::::::0:-6:11:12:1:-7:18:18:2:42:::
BM20	59	14	0.111111	TGTGCCAGCAGTTACTCGGGGGACAGGGTGGATGCTTTCTTT	FEEFEEEFFEEFFFFFFFEEFEEFFFEFEFFFFFFEFFEFFF	TRBV6-5*00(267),TRBV6-8*00(267),TRBV6-6*00(251),TRBV6-1*00(237)	TRBD1*00(45)	TRBJ1-1*00(185)		427|445|464|0|18||90.0;424|442|461|0|18||90.0;427|445|464|0|18||90.0;427|439|464|0|12||60.0	12|21|36|19|28||45.0	31|40|68|33|42||45.0		NA	NA	NA	NA	NA	NA	NA	NA	NA	NA	TGTGCCAGCAGTTACTCGGGGGACAGGGTGGATGCTTTCTTT	36	NA	NA	NA	NA	NA	NA	NA	CASSYSGDRVDAFF	NA	:::::::::0:1:18:19:0:-3:28:33:-11:42:::
BM20	62	13	0.103175	TGTGCCAGCAGTAGACTAGCGGGAGCCAACGAGCAGTACTTC	CDCDBEDEEEEDEE@EDEDCDDDEBEED=EBEEEDED<DDDD	TRBV6-1*00(165.4),TRBV6-5*00(165.4),TRBV6-6*00(165.4)	TRBD2*00(60)	TRBJ2-7*00(194)		427|439|464|0|12||60.0;427|439|464|0|12||60.0;427|439|464|0|12||60.0	18|30|48|13|25||60.0	25|39|67|28|42||70.0		NA	NA	NA	NA	NA	NA	NA	NA	NA	NA	TGTGCCAGCAGTAGACTAGCGGGAGCCAACGAGCAGTACTTC	27	NA	NA	NA	NA	NA	NA	NA	CASSRLAGANEQYF	NA	:::::::::0:-5:12:13:-2:-2:25:28:-5:42:::
BM20	67	11	0.0873016	TGTGCCAGCAGTTACGGGACTAGCGGGACCCCCCCCCACGAGCAGTACTTC	FEEEFFEEFEFEFEFEFEEFFEEFFEFDEEFFFFFFFEFEEFEEEEEEEEE	TRBV6-5*00(236),TRBV6-8*00(236),TRBV6-1*00(221),TRBV6-6*00(220),TRBV6-3*00(210)	TRBD2*00(65)	TRBJ2-7*00(130)		427|442|464|0|15||75.0;424|439|461|0|15||75.0;427|439|464|0|12||60.0;427|442|464|0|15||75.0;427|442|464|0|15||75.0	16|29|48|15|28||65.0	25|39|67|37|51||70.0		NA	NA	NA	NA	NA	NA	NA	NA	NA	NA	TGTGCCAGCAGTTACGGGACTAGCGGGACCCCCCCCCACGAGCAGTACTTC	35	NA	NA	NA	NA	NA	NA	NA	CASSYGTSGTPPHEQYF	NA	:::::::::0:-2:15:15:0:-3:28:37:-5:51:::
BM20	71	10	0.0793651	TGTGCCAGCTCACCACCCGGACTAGGGGCGGCAGATACGCAGTATTTT	FEEEEEEEEEEEEEEEEEFEEEEEEEEEEEEEEEEEEEEEEEEEEEEE	TRBV18*00(619)	TRBD2*00(35),TRBD1*00(30)	TRBJ2-3*00(225)		430|447|467|0|17||85.0	17|24|48|18|25||35.0;19|25|36|24|30||30.0	24|41|69|31|48||85.0		NA	NA	NA	NA	NA	NA	NA	NA	NA	NA	TGTGCCAGCTCACCACCCGGACTAGGGGCGGCAGATACGCAGTATTTT	36	NA	NA	NA	NA	NA	NA	NA	CASSPPGLGAADTQYF	NA	:::::::::0:0:17:18:-1:-8:25:31:-4:48:::
BM20	73	9	0.0714286	TGTGCCAGCAGTTTCGGGTTTTCTGGAAACACCATATATTTT	EEEEDCDCDEEDEDCEDDCDEDDEEEEADDEEDDEEEDEEDE	TRBV28*00(181.1)		TRBJ1-3*00(241.4)		427|441|464|0|14||70.0		21|42|70|21|42||105.0		NA	NA	NA	NA	NA	NA	NA	NA	NA	NA	TGTGCCAGCAGTTTCGGGTTTTCTGGAAACACCATATATTTT	32	NA	NA	NA	NA	NA	NA	NA	CASSFGFSGNTIYF	NA	:::::::::0:-3:14:::::21:-1:42:::
BM20	74	8	0.0634921	TGTGCCAGCAGTGAAATTAGCGTCGGGAGTCAGCCCCAGCATTTT	FFFFFFFFFFFEFFFFFFEFFFEEFFFFFEFFFFEFFFEFFFFFF	TRBV6-1*00(252),TRBV6-9*00(237),TRBV6-6*00(221)	TRBD2*00(30)	TRBJ1-5*00(220)		427|442|464|0|15||75.0;427|439|464|0|12||60.0;427|439|464|0|12||60.0	24|30|48|23|29||30.0	26|42|70|29|45||80.0		NA	NA	NA	NA	NA	NA	NA	NA	NA	NA	TGTGCCAGCAGTGAAATTAGCGTCGGGAGTCAGCCCCAGCATTTT	36	NA	NA	NA	NA	NA	NA	NA	CASSEISVGSQPQHF	NA	:::::::::0:-2:15:23:-8:-2:29:29:-6:45:::
BM20	76	4	0.031746	TGTGCCACGTCCGACATCGCGGGAGAAAAACTGTTTTTT	EDECDECEAEEDEAEBECEDEEEEEECEDC@E@EEEEEE	TRBV15*00(172.3)	TRBD2*00(30)	TRBJ1-4*00(197)		427|435|464|0|8||40.0	23|29|48|18|24||30.0	28|43|71|24|39||75.0		NA	NA	NA	NA	NA	NA	NA	NA	NA	NA	TGTGCCACGTCCGACATCGCGGGAGAAAAACTGTTTTTT	31	NA	NA	NA	NA	NA	NA	NA	CATSDIAGEKLFF	NA	:::::::::0:-9:8:18:-7:-3:24:24:-8:39:::
BM20	77	3	0.0238095	TGTGCCAGCAGTCCCGTTGGGAACACTGAAGCTTTCTTT	EEEDACDEDECAEBEE<EEECDDDDEDDDDCBDEEEEED	TRBV12-3*00(184.7),TRBV12-4*00(184.7)		TRBJ1-1*00(235)		430|442|467|0|12||60.0;430|442|467|0|12||60.0		21|40|68|20|39||95.0		NA	NA	NA	NA	NA	NA	NA	NA	NA	NA	TGTGCCAGCAGTCCCGTTGGGAACACTGAAGCTTTCTTT	27	NA	NA	NA	NA	NA	NA	NA	CASSPVGNTEAFF	NA	:::::::::0:-5:12:::::20:-1:39:::
BM20	78	2	0.015873	TGTGCCAGCTCCCGTGGGGTTAGCTATGGCTACACCTTC	EEEEEDEEEBC@DEDDEEEEAEEDCEEEDEEDEEAEEDB	TRBV12-3*00(161),TRBV12-4*00(161)	TRBD1*00(25),TRBD2*00(25)	TRBJ1-2*00(220)		430|439|467|0|9||45.0;430|439|467|0|9||45.0	8|13|36|9|14||25.0;3|8|48|9|14||25.0	24|40|68|23|39||80.0		NA	NA	NA	NA	NA	NA	NA	NA	NA	NA	TGTGCCAGCTCCCGTGGGGTTAGCTATGGCTACACCTTC	31	NA	NA	NA	NA	NA	NA	NA	CASSRGVSYGYTF	NA	:::::::::0:-8:9:9:4:-11:14:23:-4:39:::
BM20	79	2	0.015873	TGTGCCAGCAGTCCAGGACAGGGGAGTGAAAAACTGTTTTTT	D9DD8EAED@CB@D=DE@BADDEDBDEEC@:CC?D=DED@=B	TRBV12-3*00(186),TRBV12-4*00(186)	TRBD1*00(45)	TRBJ1-4*00(210)		430|442|467|0|12||60.0;430|442|467|0|12||60.0	13|22|36|15|24||45.0	27|43|71|26|42||80.0		NA	NA	NA	NA	NA	NA	NA	NA	NA	NA	TGTGCCAGCAGTCCAGGACAGGGGAGTGAAAAACTGTTTTTT	23	NA	NA	NA	NA	NA	NA	NA	CASSPGQGSEKLFF	NA	:::::::::0:-5:12:15:-1:-2:24:26:-7:42:::
BM20	80	2	0.015873	TGTGCCAGCAGTTTATCGGGAGGGGATAATTCACCCCTCCACTTT	EEEEEDEEEEDDDE<EEEEEEEEEEEEDEEEEECECEEEE@EEEE	TRBV12-3*00(185),TRBV12-4*00(185)	TRBD2*00(40)	TRBJ1-6*00(224)		430|445|467|0|15||75.0;430|445|467|0|15||75.0	24|32|48|16|24||40.0	25|45|73|25|45||100.0		NA	NA	NA	NA	NA	NA	NA	NA	NA	NA	TGTGCCAGCAGTTTATCGGGAGGGGATAATTCACCCCTCCACTTT	27	NA	NA	NA	NA	NA	NA	NA	CASSLSGGDNSPLHF	NA	:::::::::0:-2:15:16:-8:0:24:25:-5:45:::
BM20	81	2	0.015873	TGCAGCGGCCTGGTCCTGGGGCGCTACACCTTC	FDEEDEEEEDEEEEEEFFEEEEEE>EFEEFEFE	TRBV29-1*00(258)	TRBD1*00(25)	TRBJ1-2*00(71)		421|428|455|0|7||35.0	19|24|36|17|22||25.0	29|40|68|22|33||55.0		NA	NA	NA	NA	NA	NA	NA	NA	NA	NA	TGCAGCGGCCTGGTCCTGGGGCGCTACACCTTC	29	NA	NA	NA	NA	NA	NA	NA	CSGLVLGRYTF	NA	:::::::::0:-7:7:17:-7:0:22:22:-9:33:::
BM20	82	2	0.015873	TGTGCCAGCAGTGAGGCAGGGGGCATTGAAAAACTGTTTTTT	DEDEDEEDEEE>BEEEEEEEEEBBEEEEDEEEEDE>EEEEEB	TRBV6-1*00(212.5),TRBV6-5*00(202.5),TRBV6-6*00(194.5)	TRBD1*00(40)	TRBJ1-4*00(210)		427|441|464|0|14||70.0;427|439|464|0|12||60.0;427|439|464|0|12||60.0	16|24|36|16|24||40.0	27|43|71|26|42||80.0		NA	NA	NA	NA	NA	NA	NA	NA	NA	NA	TGTGCCAGCAGTGAGGCAGGGGGCATTGAAAAACTGTTTTTT	29	NA	NA	NA	NA	NA	NA	NA	CASSEAGGIEKLFF	NA	:::::::::0:-3:14:16:-4:0:24:26:-7:42:::
BM20	90	1	0.00793651	TGTGCCAGCAGTGGAGACACGAACTATGGCTACACCTTC	EEDEEEEDEDEDEEEDDECCBC>EECEBCEACEDEDCDD	TRBV12-3*00(200),TRBV12-4*00(200)		TRBJ1-2*00(230)		430|442|467|0|12||60.0;430|442|467|0|12||60.0		22|40|68|21|39||90.0		NA	NA	NA	NA	NA	NA	NA	NA	NA	NA	TGTGCCAGCAGTGGAGACACGAACTATGGCTACACCTTC	29	NA	NA	NA	NA	NA	NA	NA	CASSGDTNYGYTF	NA	:::::::::0:-5:12:::::21:-2:39:::
BM20	91	1	0.00793651	TGTGCCAGCAGTTATGAGGGTGCGGGGGGAAACACCATATATTTT	ECD<@C@E;DEEBB@EAEDD8E>DDDCCEDDDE@9B@EBE<BBCE	TRBV12-3*00(175),TRBV12-4*00(175)	TRBD2*00(25)	TRBJ1-3*00(230)		430|443|467|0|13||65.0;430|443|467|0|13||65.0	23|28|48|21|26||25.0	24|42|70|27|45||90.0		NA	NA	NA	NA	NA	NA	NA	NA	NA	NA	TGTGCCAGCAGTTATGAGGGTGCGGGGGGAAACACCATATATTTT	23	NA	NA	NA	NA	NA	NA	NA	CASSYEGAGGNTIYF	NA	:::::::::0:-4:13:21:-7:-4:26:27:-4:45:::
BM20	92	1	0.00793651	TGTGCCAGCAGATATAACAGGGGCAATGAGCAGTTCTTC	EEEEEFEDEEEEFEEEEEEEEAEFECEFEEED<EEEEEF	TRBV12-3*00(184),TRBV12-4*00(184)	TRBD1*00(35)	TRBJ2-1*00(220)		430|441|467|0|11||55.0;430|441|467|0|11||55.0	15|22|36|16|23||35.0	26|42|70|23|39||80.0		NA	NA	NA	NA	NA	NA	NA	NA	NA	NA	TGTGCCAGCAGATATAACAGGGGCAATGAGCAGTTCTTC	27	NA	NA	NA	NA	NA	NA	NA	CASRYNRGNEQFF	NA	:::::::::0:-6:11:16:-3:-2:23:23:-6:39:::
BM20	95	1	0.00793651	TGTGCCAGTAGTACGGGCCTCGCAGGGGACACTGAAGCTTTCTTT	EEEFEEEEEEEDEEEEEEEDEEEEEEEEEEFEEEEEDEEEFEEEE	TRBV19*00(329)	TRBD1*00(30)	TRBJ1-1*00(225)		427|440|464|0|13||65.0	16|22|36|22|28||30.0	23|40|68|28|45||85.0		NA	NA	NA	NA	NA	NA	NA	NA	NA	NA	TGTGCCAGTAGTACGGGCCTCGCAGGGGACACTGAAGCTTTCTTT	35	NA	NA	NA	NA	NA	NA	NA	CASSTGLAGDTEAFF	NA	:::::::::0:-4:13:22:-4:-2:28:28:-3:45:::
BM20	97	1	0.00793651	TGTGCCAGCAGTGAAGTCGGCAGGGGTAGCACTGAAGCTTTCTTT	EEEE@CEEEEBEED?DEAEDE:EE9EDEDEEEEED@=EEEEDEEE	TRBV2*00(190)	TRBD1*00(30)	TRBJ1-1*00(220)		430|446|467|0|16||80.0	16|22|36|20|26||30.0	24|40|68|29|45||80.0		NA	NA	NA	NA	NA	NA	NA	NA	NA	NA	TGTGCCAGCAGTGAAGTCGGCAGGGGTAGCACTGAAGCTTTCTTT	24	NA	NA	NA	NA	NA	NA	NA	CASSEVGRGSTEAFF	NA	:::::::::0:-1:16:20:-4:-2:26:29:-4:45:::
BM20	98	1	0.00793651	TGTGCCAGCAGGAGAGGTTCAACTAATGAAAAACTGTTTTTT	C?@ACD8DDEDDCD@CEBCCA<CEE@D@<ACD@ED?CACAD@	TRBV2*00(215)		TRBJ1-4*00(245)		430|441|467|0|11||55.0		20|43|71|19|42||115.0		NA	NA	NA	NA	NA	NA	NA	NA	NA	NA	TGTGCCAGCAGGAGAGGTTCAACTAATGAAAAACTGTTTTTT	23	NA	NA	NA	NA	NA	NA	NA	CASRRGSTNEKLFF	NA	:::::::::0:-6:11:::::19:0:42:::
BM20	99	1	0.00793651	TGTGCCAGCAGTGCCACCCGACAGGGAGGAAGGAATTCACCCCTCCACTTT	EDBACEBEEDEAAEECEDDECEEEEEEECE=E9EEA<E?EECEBCE?EEED	TRBV25-1*00(145)	TRBD1*00(35),TRBD2*00(30)	TRBJ1-6*00(214)		427|440|464|0|13||65.0	14|21|36|19|26||35.0;25|31|48|23|29||30.0	27|45|73|33|51||90.0		NA	NA	NA	NA	NA	NA	NA	NA	NA	NA	TGTGCCAGCAGTGCCACCCGACAGGGAGGAAGGAATTCACCCCTCCACTTT	24	NA	NA	NA	NA	NA	NA	NA	CASSATRQGGRNSPLHF	NA	:::::::::0:-4:13:19:-2:-3:26:33:-7:51:::
BM20	100	1	0.00793651	TGTGCCAGCAGTTTAAGCCAGGGGTGGGCCTCCTACGAGCAGTACTTC	E@EEDDEADEECDBCAC@EEBEDEBDB9EE?DEE@EEEDCECECCADD	TRBV27*00(170)	TRBD1*00(30)	TRBJ2-7*00(235)		427|442|464|0|15||75.0	16|22|36|18|24||30.0	20|39|67|29|48||95.0		NA	NA	NA	NA	NA	NA	NA	NA	NA	NA	TGTGCCAGCAGTTTAAGCCAGGGGTGGGCCTCCTACGAGCAGTACTTC	24	NA	NA	NA	NA	NA	NA	NA	CASSLSQGWASYEQYF	NA	:::::::::0:-2:15:18:-4:-2:24:29:0:48:::
BM20	101	1	0.00793651	TGTGCCAGCGGAACAGGGGCTTTGAACACTGAAGCTTTCTTT	EEEDBEDEEDED7D=EBEEECBEED;D9BECAB@BEEDEEDE	TRBV28*00(170)	TRBD1*00(35)	TRBJ1-1*00(240)		427|436|464|0|9||45.0	15|22|36|12|19||35.0	20|40|68|22|42||100.0		NA	NA	NA	NA	NA	NA	NA	NA	NA	NA	TGTGCCAGCGGAACAGGGGCTTTGAACACTGAAGCTTTCTTT	22	NA	NA	NA	NA	NA	NA	NA	CASGTGALNTEAFF	NA	:::::::::0:-8:9:12:-3:-2:19:22:0:42:::
BM20	102	1	0.00793651	TGTGCCAGCAGTAATCCGGGACAGGGGTTGGATGGCTACACCTTC	ECEEDEBCDEEDD:ADEEDE>DEEEDEEEECDEEDAD@EDBBEE=	TRBV28*00(264)	TRBD1*00(60)	TRBJ1-2*00(210)		427|439|464|0|12||60.0	10|22|36|15|27||60.0	26|40|68|31|45||70.0		NA	NA	NA	NA	NA	NA	NA	NA	NA	NA	TGTGCCAGCAGTAATCCGGGACAGGGGTTGGATGGCTACACCTTC	25	NA	NA	NA	NA	NA	NA	NA	CASSNPGQGLDGYTF	NA	:::::::::0:-5:12:15:2:-2:27:31:-6:45:::
BM20	103	1	0.00793651	TGTGCCAGCAGTGAGGGAGACAGGGGGTTGGCTTTCTTT	EAEDEDBCEBEAB9EE97B8DDD@<EBCCD7ED9CCCCD	TRBV6-1*00(210),TRBV6-5*00(200),TRBV6-6*00(200),TRBV6-2*00(184),TRBV6-3*00(184)	TRBD1*00(45)	TRBJ1-1*00(185)		427|441|464|0|14||70.0;427|439|464|0|12||60.0;427|439|464|0|12||60.0;427|439|464|0|12||60.0;427|439|464|0|12||60.0	14|23|36|18|27||45.0	31|40|68|30|39||45.0		NA	NA	NA	NA	NA	NA	NA	NA	NA	NA	TGTGCCAGCAGTGAGGGAGACAGGGGGTTGGCTTTCTTT	22	NA	NA	NA	NA	NA	NA	NA	CASSEGDRGLAFF	NA	:::::::::0:-3:14:18:-2:-1:27:30:-11:39:::
BM20	105	1	0.00793651	TGTGCCAGCAGTTACTCGAGTAGGGAGGGATATAGCAATCAGCCCCAGCATTTT	DE@D<EEE>EEA8DBD9EEE>EEAEEEEEDDDBADEEE?DEEBBB@EEDBEDED	TRBV6-2*00(175),TRBV6-3*00(175),TRBV6-5*00(175),TRBV6-6*00(175),TRBV6-8*00(159)	TRBD2*00(35)	TRBJ1-5*00(260)		427|449|464|0|22||110.0;427|449|464|0|22||110.0;427|449|464|0|22||110.0;427|449|464|0|22||110.0;424|446|461|0|22||110.0	25|32|48|22|29||35.0	18|42|70|30|54||120.0		NA	NA	NA	NA	NA	NA	NA	NA	NA	NA	TGTGCCAGCAGTTACTCGAGTAGGGAGGGATATAGCAATCAGCCCCAGCATTTT	23	NA	NA	NA	NA	NA	NA	NA	CASSYSSREGYSNQPQHF	NA	:::::::::0:5:22:22:-9:0:29:30:2:54:::
BM20	106	1	0.00793651	TGTGCCAGCAGTCCGACTAGCGGACCGGACAATGAGCAGTTCTTC	E@B@C@DC:CD;<?@=BCEC68CDBCCDBE>CDACBEADEBD@C@	TRBV6-1*00(150),TRBV6-4*00(150),TRBV6-5*00(150),TRBV6-6*00(150),TRBV10-3*00(134)	TRBD2*00(45)	TRBJ2-1*00(225)		427|439|464|0|12||60.0;427|439|464|0|12||60.0;427|439|464|0|12||60.0;427|439|464|0|12||60.0;427|439|464|0|12|ST434G|44.0	18|27|48|14|23||45.0	25|42|70|28|45||85.0		NA	NA	NA	NA	NA	NA	NA	NA	NA	NA	TGTGCCAGCAGTCCGACTAGCGGACCGGACAATGAGCAGTTCTTC	21	NA	NA	NA	NA	NA	NA	NA	CASSPTSGPDNEQFF	NA	:::::::::0:-5:12:14:-2:-5:23:28:-5:45:::
BM20	107	1	0.00793651	TGTGCCAGCAGTTTACTAGCGGGGGTATTAGATACGCAGTATTTT	FDEEECE=EEDDDEEEEEED>9>EDD@EF@EED;EEEB=DDDE<D	TRBV6-5*00(226),TRBV6-8*00(226),TRBV6-1*00(221),TRBV6-6*00(210),TRBV6-3*00(200)	TRBD2*00(45)	TRBJ2-3*00(220)		427|440|464|0|13||65.0;424|437|461|0|13||65.0;427|439|464|0|12||60.0;427|440|464|0|13||65.0;427|440|464|0|13||65.0	19|28|48|14|23||45.0	25|41|69|29|45||80.0		NA	NA	NA	NA	NA	NA	NA	NA	NA	NA	TGTGCCAGCAGTTTACTAGCGGGGGTATTAGATACGCAGTATTTT	24	NA	NA	NA	NA	NA	NA	NA	CASSLLAGVLDTQYF	NA	:::::::::0:-4:13:14:-3:-4:23:29:-5:45:::
BM20	108	1	0.00793651	TGTGCCAGCAGTTACGGGACTAGCGGGATCCCCCCCCACGAGCAGTACTTC	FFFEEEFEFEEEEEEEEEDEEEFEEEFEEFEFEEEEEDEEEFEEEEEEEEF	TRBV6-5*00(236),TRBV6-8*00(236),TRBV6-1*00(221),TRBV6-2*00(210),TRBV6-3*00(210)	TRBD2*00(65)	TRBJ2-7*00(130)		427|442|464|0|15||75.0;424|439|461|0|15||75.0;427|439|464|0|12||60.0;427|442|464|0|15||75.0;427|442|464|0|15||75.0	16|29|48|15|28||65.0	25|39|67|37|51||70.0		NA	NA	NA	NA	NA	NA	NA	NA	NA	NA	TGTGCCAGCAGTTACGGGACTAGCGGGATCCCCCCCCACGAGCAGTACTTC	35	NA	NA	NA	NA	NA	NA	NA	CASSYGTSGIPPHEQYF	NA	:::::::::0:-2:15:15:0:-3:28:37:-5:51:::
BM20	110	1	0.00793651	TGTGCCAGCAGCGTGGGACTAGCATTAACCAATGAGCAGTTCTTC	CDD?=EE=DD<EEEC<@DBEDBD;CEEBCEEEECEC>E?C@EDE=	TRBV11-2*00(150),TRBV11-3*00(150),TRBV7-2*00(150),TRBV5-5*00(138),TRBV5-8*00(138)	TRBD2*00(45)	TRBJ2-1*00(220)		430|442|467|0|12||60.0;430|442|467|0|12||60.0;430|442|467|0|12||60.0;427|443|463|0|16|ST439G|64.0;427|443|463|0|16|ST439G|64.0	16|25|48|14|23||45.0	26|42|70|29|45||80.0		NA	NA	NA	NA	NA	NA	NA	NA	NA	NA	TGTGCCAGCAGCGTGGGACTAGCATTAACCAATGAGCAGTTCTTC	26	NA	NA	NA	NA	NA	NA	NA	CASSVGLALTNEQFF	NA	:::::::::0:-5:12:14:0:-7:23:29:-6:45:::
BM20	111	1	0.00793651	TGTGCCAGCACCCTTCGGGAGACCCAGTACTTC	EEEEEFEEEEEFEEEFEEEEEEEEFEFEEFEEF	TRBV7-2*00(333),TRBV7-8*00(323)		TRBJ2-5*00(215)		430|440|467|0|10||50.0;430|440|467|0|10||50.0		25|40|68|18|33||75.0		NA	NA	NA	NA	NA	NA	NA	NA	NA	NA	TGTGCCAGCACCCTTCGGGAGACCCAGTACTTC	36	NA	NA	NA	NA	NA	NA	NA	CASTLRETQYF	NA	:::::::::0:-7:10:::::18:-5:33:::
BM20	112	1	0.00793651	TGTGCCAGCAGCCCCGAGGCGGCGGGACGTAATGAGCAGTTCTTC	EEECEE=EEEEEDDEEEEEDEEEEEEEEEEEEEEEEEEEEEEEEE	TRBV7-3*00(150),TRBV11-2*00(134),TRBV11-3*00(134),TRBV7-2*00(134),TRBV7-8*00(134)	TRBD1*00(30),TRBD2*00(30)	TRBJ2-1*00(215)		430|442|467|0|12||60.0;430|442|467|0|12||60.0;430|442|467|0|12||60.0;430|442|467|0|12||60.0;430|442|467|0|12||60.0	11|17|36|22|28||30.0;15|21|48|22|28||30.0	27|42|70|30|45||75.0		NA	NA	NA	NA	NA	NA	NA	NA	NA	NA	TGTGCCAGCAGCCCCGAGGCGGCGGGACGTAATGAGCAGTTCTTC	28	NA	NA	NA	NA	NA	NA	NA	CASSPEAAGRNEQFF	NA	:::::::::0:-5:12:22:1:-7:28:30:-7:45:::
BM20	113	1	0.00793651	TGTGCCAGCAGCTTTGGAGAGGTGGCCCTCCACTTT	EEEBECEEEB@EEBDD8EDEDEEEDB?DA>@@EEDD	TRBV7-9*00(225)		TRBJ1-6*00(195)		430|444|467|0|14||70.0		34|45|73|25|36||55.0		NA	NA	NA	NA	NA	NA	NA	NA	NA	NA	TGTGCCAGCAGCTTTGGAGAGGTGGCCCTCCACTTT	23	NA	NA	NA	NA	NA	NA	NA	CASSFGEVALHF	NA	:::::::::0:-3:14:::::25:-14:36:::
BM20	114	1	0.00793651	TGTGCCAGCAGCGCAACGCCTAATTCACCCCTCCACTTT	EEEEDEEEEEEEEEECEEBEEEEEEEDEB?EEEEEEEEE	TRBV7-9*00(200)		TRBJ1-6*00(235)		430|442|467|0|12||60.0		26|45|73|20|39||95.0		NA	NA	NA	NA	NA	NA	NA	NA	NA	NA	TGTGCCAGCAGCGCAACGCCTAATTCACCCCTCCACTTT	30	NA	NA	NA	NA	NA	NA	NA	CASSATPNSPLHF	NA	:::::::::0:-5:12:::::20:-6:39:::
BM21	225	5	0.185185	TGTGCCACCAGCTGGGTCAACAATGAGCAGTTCTTC	EEEFEFEEEEEEEEEFEEEEEFEEEEEFEEEEEEFE	TRBV24-1*00(278)		TRBJ2-5*00(153),TRBJ2-1*00(145)		427|438|465|0|11||55.0		31|40|68|27|36|SA35T|29.0;25|42|70|19|36||85.0		NA	NA	NA	NA	NA	NA	NA	NA	NA	NA	TGTGCCACCAGCTGGGTCAACAATGAGCAGTTCTTC	36	NA	NA	NA	NA	NA	NA	NA	CATSWVNNEQFF	NA	:::::::::0:-7:11:::::27:-11:36:::
BM21	543	3	0.111111	TGTGCCAGCAGCTTAATCCCACCTATGGAGCAGTACTTC	CDDDEACEDDBEDEBDCDDDC<CD@BCADDEEEEDEDDD	TRBV7-6*00(207),TRBV7-7*00(191)		TRBJ2-7*00(184)		430|445|467|0|15||75.0;430|445|467|0|15||75.0		27|39|67|27|39||60.0		NA	NA	NA	NA	NA	NA	NA	NA	NA	NA	TGTGCCAGCAGCTTAATCCCACCTATGGAGCAGTACTTC	27	NA	NA	NA	NA	NA	NA	NA	CASSLIPPMEQYF	NA	:::::::::0:-2:15:::::27:-7:39:::
BM21	772	2	0.0740741	TGTGCCAGCACTACATTGGTCCGGGGGTTGAACACTGAAGCTTTCTTT	EDEBEEDEEBEEDEEEE@DDDEEEEEBDDEE<EEEBEEEBDEEDEEDE	TRBV12-3*00(137),TRBV12-4*00(137)	TRBD1*00(25),TRBD2*00(25)	TRBJ1-1*00(240)		430|440|467|0|10||50.0;430|440|467|0|10||50.0	10|15|36|20|25||25.0;14|19|48|20|25||25.0	20|40|68|28|48||100.0		NA	NA	NA	NA	NA	NA	NA	NA	NA	NA	TGTGCCAGCACTACATTGGTCCGGGGGTTGAACACTGAAGCTTTCTTT	27	NA	NA	NA	NA	NA	NA	NA	CASTTLVRGLNTEAFF	NA	:::::::::0:-7:10:20:2:-9:25:28:0:48:::
BM21	773	2	0.0740741	TGTGCCAGTAGTATAAGCCTAGTTAACACCGGGGAGCTGTTTTTT	EEFEEEEEEEEEEEEEEEEEEEEFEEFEFEEEFFEEEFEFEEFEE	TRBV19*00(262)	TRBD2*00(25)	TRBJ2-2*00(95)		427|442|464|0|15||75.0	8|13|48|18|23||25.0	22|43|71|24|45||105.0		NA	NA	NA	NA	NA	NA	NA	NA	NA	NA	TGTGCCAGTAGTATAAGCCTAGTTAACACCGGGGAGCTGTTTTTT	36	NA	NA	NA	NA	NA	NA	NA	CASSISLVNTGELFF	NA	:::::::::0:-2:15:18:8:-19:23:24:-2:45:::
BM21	774	2	0.0740741	TGCAGTGCTAGAGATCTGAGCGGGAATAGGAATGAGCAGTTCTTC	EEEEEAEEEEDEEE@EEEEEEEEEDEDD>EEED7EDEEDADE@EE	TRBV20-1*00(423)	TRBD2*00(35)	TRBJ2-1*00(215)		421|438|455|0|17||85.0	22|29|48|18|25||35.0	27|42|70|30|45||75.0		NA	NA	NA	NA	NA	NA	NA	NA	NA	NA	TGCAGTGCTAGAGATCTGAGCGGGAATAGGAATGAGCAGTTCTTC	22	NA	NA	NA	NA	NA	NA	NA	CSARDLSGNRNEQFF	NA	:::::::::0:3:17:18:-6:-3:25:30:-7:45:::
BM21	951	1	0.037037	TGTGCCATCAGTGAGGTTGAGGGACAGGAGGCTCCGAGCTATGGCTACACCTTC	BDEBEC:CECEEECEDDEEEEECEEECADCDDDDCEEC>DDEDDDECED?DEDE	TRBV10-3*00(140)	TRBD1*00(44)	TRBJ1-2*00(140)		427|442|464|0|15||75.0	12|24|36|20|32|SG20A|44.0	24|40|68|38|54||80.0		NA	NA	NA	NA	NA	NA	NA	NA	NA	NA	TGTGCCATCAGTGAGGTTGAGGGACAGGAGGCTCCGAGCTATGGCTACACCTTC	25	NA	NA	NA	NA	NA	NA	NA	CAISEVEGQEAPSYGYTF	NA	:::::::::0:-2:15:20:0:0:32:38:-4:54:::
BM21	952	1	0.037037	TGTGCCATCAAATCCCTAGCGGGGGCTTACGAGCAGTACTTC	EEDE=EECEEE;EEBEEDAEEDEDEDCE9DE@EEEEEDDEEE	TRBV10-3*00(506)	TRBD2*00(40)	TRBJ2-7*00(151)		427|437|464|0|10||50.0	20|28|48|15|23||40.0	24|39|67|27|42||75.0		NA	NA	NA	NA	NA	NA	NA	NA	NA	NA	TGTGCCATCAAATCCCTAGCGGGGGCTTACGAGCAGTACTTC	24	NA	NA	NA	NA	NA	NA	NA	CAIKSLAGAYEQYF	NA	:::::::::0:-7:10:15:-4:-4:23:27:-4:42:::
BM21	953	1	0.037037	TGTGCCAGCAGCCGCTTTGGGCAGGGGGGTGACTACACCTTC	ECECAEDD<C<ECE=DCDEDEEDCEDDDDB@ADDDECCBEDE	TRBV14*00(190)	TRBD1*00(35)	TRBJ1-2*00(190)		430|443|467|0|13||65.0	16|23|36|21|28||35.0	30|40|68|32|42||50.0		NA	NA	NA	NA	NA	NA	NA	NA	NA	NA	TGTGCCAGCAGCCGCTTTGGGCAGGGGGGTGACTACACCTTC	27	NA	NA	NA	NA	NA	NA	NA	CASSRFGQGGDYTF	NA	:::::::::0:-4:13:21:-4:-1:28:32:-10:42:::
BM21	954	1	0.037037	TGTGCCAGTAGCCAGGGAAGCTCTGGGGCCAACGTCCTGACTTTC	EEEECEEEDEEEEEEEEEEEEEEEEEEDEEBCEEEDDEEEDEEDE	TRBV19*00(165)	TRBD1*00(25)	TRBJ2-6*00(275)		427|438|464|0|11||55.0	16|21|36|12|17||25.0	18|45|73|18|45||135.0		NA	NA	NA	NA	NA	NA	NA	NA	NA	NA	TGTGCCAGTAGCCAGGGAAGCTCTGGGGCCAACGTCCTGACTTTC	33	NA	NA	NA	NA	NA	NA	NA	CASSQGSSGANVLTF	NA	:::::::::0:-6:11:12:-4:-3:17:18:2:45:::
BM21	955	1	0.037037	TGTGCCAGCAGTGAAGCGCTAGCAGGGGATACGCAGTATTTT	@EDEDEBEEDC@DBABDBE6D=EDCDACB?==BEECE?8C<D	TRBV2*00(194)	TRBD1*00(25)	TRBJ2-3*00(215)		430|450|467|0|20||100.0	16|21|36|22|27||25.0	26|41|69|27|42||75.0		NA	NA	NA	NA	NA	NA	NA	NA	NA	NA	TGTGCCAGCAGTGAAGCGCTAGCAGGGGATACGCAGTATTTT	21	NA	NA	NA	NA	NA	NA	NA	CASSEALAGDTQYF	NA	:::::::::0:3:20:22:-4:-3:27:27:-6:42:::
BM21	956	1	0.037037	TGTGCCAGTCGTGCAGGGGGTGGCTACGAGCAGTACTTC	EEEEEEEFEEEEEEEEEEEEEEEEFDEEEEEEEEDEEEE	TRBV2*00(299)	TRBD1*00(35)	TRBJ2-7*00(220)		430|438|467|0|8||40.0	16|23|36|13|20||35.0	23|39|67|23|39||80.0		NA	NA	NA	NA	NA	NA	NA	NA	NA	NA	TGTGCCAGTCGTGCAGGGGGTGGCTACGAGCAGTACTTC	35	NA	NA	NA	NA	NA	NA	NA	CASRAGGGYEQYF	NA	:::::::::0:-9:8:13:-4:-1:20:23:-3:39:::
BM21	957	1	0.037037	TGCAGTGCCTCGGGGACAGCTAACTATGGCTACACCTTC	EEDEEEEEEBDEEDEEEEEEEEEEEEEEDEEEEDCEECE	TRBV20-1*00(378)	TRBD1*00(25),TRBD2*00(25)	TRBJ1-2*00(250)		421|429|455|0|8||40.0	12|17|36|12|17||25.0;16|21|48|12|17||25.0	18|40|68|17|39||110.0		NA	NA	NA	NA	NA	NA	NA	NA	NA	NA	TGCAGTGCCTCGGGGACAGCTAACTATGGCTACACCTTC	33	NA	NA	NA	NA	NA	NA	NA	CSASGTANYGYTF	NA	:::::::::0:-6:8:12:0:-7:17:17:2:39:::
BM21	958	1	0.037037	TGTGCCAGCAGTTTATTCAGGGTCGGTTATTCACCCCTCCACTTT	EEEDDEECEEE9EEEDEEE8ECEBEEEDEEE;DECBE<DEEDDDE	TRBV27*00(236),TRBV28*00(220)	TRBD1*00(25)	TRBJ1-6*00(124)		427|443|464|0|16||80.0;427|443|464|0|16||80.0	16|21|36|17|22||25.0	28|45|73|28|45||85.0		NA	NA	NA	NA	NA	NA	NA	NA	NA	NA	TGTGCCAGCAGTTTATTCAGGGTCGGTTATTCACCCCTCCACTTT	23	NA	NA	NA	NA	NA	NA	NA	CASSLFRVGYSPLHF	NA	:::::::::0:-1:16:17:-4:-3:22:28:-8:45:::
BM21	960	1	0.037037	TGCGCCAGCACGACAGGGATCCAAGAGACCCAGTACTTC	EEEEEEEEEAFEEEEEEEEDEEEEEEEDDDEECEEEEDE	TRBV5-1*00(383)	TRBD1*00(35)	TRBJ2-5*00(235)		427|437|463|0|10||50.0	14|21|36|11|18||35.0	21|40|68|20|39||95.0		NA	NA	NA	NA	NA	NA	NA	NA	NA	NA	TGCGCCAGCACGACAGGGATCCAAGAGACCCAGTACTTC	32	NA	NA	NA	NA	NA	NA	NA	CASTTGIQETQYF	NA	:::::::::0:-6:10:11:-2:-3:18:20:-1:39:::
BM21	961	1	0.037037	TGTGCCAGCAGTTACTATCATGAGCAGTTCTTC	EDCEDEBEDEECADBEB;EDEACEEDED<EDAE	TRBV6-2*00(230),TRBV6-3*00(230),TRBV6-5*00(214),TRBV6-6*00(214)		TRBJ2-1*00(210)		427|443|464|0|16||80.0;427|443|464|0|16||80.0;427|443|464|0|16||80.0;427|443|464|0|16||80.0		28|42|70|19|33||70.0		NA	NA	NA	NA	NA	NA	NA	NA	NA	NA	TGTGCCAGCAGTTACTATCATGAGCAGTTCTTC	26	NA	NA	NA	NA	NA	NA	NA	CASSYYHEQFF	NA	:::::::::0:-1:16:::::19:-8:33:::
BM21	962	1	0.037037	TGTGCCAGCAGTTCCCCGGACAGGGGGGAGGTTCAAGCTTTCTTT	EDECEEEEEED@CEEEEEEBEEEEEEEEEEEDDEEEEEDEEEEEE	TRBV6-5*00(226),TRBV6-8*00(226),TRBV6-1*00(221)	TRBD1*00(54)	TRBJ1-1*00(195)		427|440|464|0|13||65.0;424|437|461|0|13||65.0;427|439|464|0|12||60.0	9|23|36|13|27|SG12C|54.0	29|40|68|34|45||55.0		NA	NA	NA	NA	NA	NA	NA	NA	NA	NA	TGTGCCAGCAGTTCCCCGGACAGGGGGGAGGTTCAAGCTTTCTTT	31	NA	NA	NA	NA	NA	NA	NA	CASSSPDRGEVQAFF	NA	:::::::::0:-4:13:13:3:-1:27:34:-9:45:::
BM21	963	1	0.037037	TGTGCCAGCAGCTTAGTAACTAGTGTGAATGAGCAGTTCTTC	E9EAEEEDEDEC@=BBEED?EEEEDEDADEEED@DEB9=9BE	TRBV11-2*00(169),TRBV7-2*00(169)	TRBD2*00(25)	TRBJ2-1*00(215)		430|446|467|0|16||80.0;430|446|467|0|16||80.0	8|13|48|19|24||25.0	27|42|70|27|42||75.0		NA	NA	NA	NA	NA	NA	NA	NA	NA	NA	TGTGCCAGCAGCTTAGTAACTAGTGTGAATGAGCAGTTCTTC	24	NA	NA	NA	NA	NA	NA	NA	CASSLVTSVNEQFF	NA	:::::::::0:-1:16:19:8:-19:24:27:-7:42:::
BM21	964	1	0.037037	TGTGCCAGCAGCGATGGGACAGGGGGCAGGGAGACCCAGTACTTC	EEE>E@EEADEEEDDEEEEEEEEEEEEEEEEE=DEEEEEECEEED	TRBV9*00(200)	TRBD1*00(60)	TRBJ2-5*00(215)		427|440|463|0|13||65.0	12|24|36|15|27||60.0	25|40|68|30|45||75.0		NA	NA	NA	NA	NA	NA	NA	NA	NA	NA	TGTGCCAGCAGCGATGGGACAGGGGGCAGGGAGACCCAGTACTTC	28	NA	NA	NA	NA	NA	NA	NA	CASSDGTGGRETQYF	NA	:::::::::0:-3:13:15:0:0:27:30:-5:45:::
BM22	1	26	0.265306	TGTGCCAGCAGGGGGATCTACAATGAGCAGTTCTTC	FFEFFFFFFFFFFFFFFFFFFFFFFFFFFFEFFFFF	TRBV28*00(259)		TRBJ2-1*00(155)		427|438|464|0|11||55.0		23|42|70|17|36||95.0		NA	NA	NA	NA	NA	NA	NA	NA	NA	NA	TGTGCCAGCAGGGGGATCTACAATGAGCAGTTCTTC	36	NA	NA	NA	NA	NA	NA	NA	CASRGIYNEQFF	NA	:::::::::0:-6:11:::::17:-3:36:::
BM22	20	14	0.142857	TGTGCCAGCAGCTTGACAACCGGGACAGGGGTCTATGGCTACACCTTC	FFFFFFFFEFFFFEFEEFFFEFFFFFFEEFFEFFFFFFFFFFFEFFFE	TRBV6-1*00(232),TRBV6-5*00(232),TRBV6-8*00(232),TRBV6-6*00(216)	TRBD1*00(60)	TRBJ1-2*00(220)		427|438|464|0|11||55.0;427|438|464|0|11||55.0;424|435|461|0|11||55.0;427|438|464|0|11||55.0	10|22|36|19|31||60.0	24|40|68|32|48||80.0		NA	NA	NA	NA	NA	NA	NA	NA	NA	NA	TGTGCCAGCAGCTTGACAACCGGGACAGGGGTCTATGGCTACACCTTC	36	NA	NA	NA	NA	NA	NA	NA	CASSLTTGTGVYGYTF	NA	:::::::::0:-6:11:19:2:-2:31:32:-4:48:::
BM22	25	11	0.112245	TGTGCCAGCAGTTACTCGACTGCAGATACGCAGTATTTT	FFEFFFFEEFEEEEFFFFEFFEFFFEFFFFFFFEEFFFF	TRBV6-5*00(270.5),TRBV6-8*00(270.5),TRBV6-6*00(254.5)		TRBJ2-3*00(225)		427|446|464|0|19||95.0;424|443|461|0|19||95.0;427|446|464|0|19||95.0		24|41|69|22|39||85.0		NA	NA	NA	NA	NA	NA	NA	NA	NA	NA	TGTGCCAGCAGTTACTCGACTGCAGATACGCAGTATTTT	36	NA	NA	NA	NA	NA	NA	NA	CASSYSTADTQYF	NA	:::::::::0:2:19:::::22:-4:39:::
BM22	28	8	0.0816327	TGTGCCAGCAGAGGGCGGGGTGAGGGGGACCAGCCCCAGCATTTT	FEEEEEEEEEFEEEEFEEFEEEEEEEEEEEEEEEEEEEEEEEEEE	TRBV12-3*00(175),TRBV12-4*00(175)	TRBD1*00(30)	TRBJ1-5*00(182.4)		430|441|467|0|11||55.0;430|441|467|0|11||55.0	17|23|36|22|28||30.0	27|42|70|30|45||75.0		NA	NA	NA	NA	NA	NA	NA	NA	NA	NA	TGTGCCAGCAGAGGGCGGGGTGAGGGGGACCAGCCCCAGCATTTT	36	NA	NA	NA	NA	NA	NA	NA	CASRGRGEGDQPQHF	NA	:::::::::0:-6:11:22:-5:-1:28:30:-7:45:::
BM22	33	3	0.0306122	TGTGCCAGCAGCGTATCCGGGGGATTAGAAAAACTGTTTTTT	EDBADEDCEDBEDD?@AEEEDDEBCD>DDDDE@EEDEBECEE	TRBV28*00(183)	TRBD1*00(25),TRBD2*00(25)	TRBJ1-4*00(205)		427|438|464|0|11||55.0	10|15|36|16|21||25.0;14|19|48|16|21||25.0	28|43|71|27|42||75.0		NA	NA	NA	NA	NA	NA	NA	NA	NA	NA	TGTGCCAGCAGCGTATCCGGGGGATTAGAAAAACTGTTTTTT	29	NA	NA	NA	NA	NA	NA	NA	CASSVSGGLEKLFF	NA	:::::::::0:-6:11:16:2:-9:21:27:-8:42:::
BM22	34	2	0.0204082	TGTGCCAGCAGTCGGGCAAGAGCTTTCTTT	EAD=CDCEAEE?9BEDEDBDEDEADADCED	TRBV12-3*00(245),TRBV12-4*00(245)		TRBJ1-1*00(190)		430|442|467|0|12||60.0;430|442|467|0|12||60.0		30|40|68|20|30||50.0		NA	NA	NA	NA	NA	NA	NA	NA	NA	NA	TGTGCCAGCAGTCGGGCAAGAGCTTTCTTT	24	NA	NA	NA	NA	NA	NA	NA	CASSRARAFF	NA	:::::::::0:-5:12:::::20:-10:30:::
BM22	35	2	0.0204082	TGTGCCAGCAGTTTGGGCCCGGGCACTGAAGCTTTCTTT	EDDDEDDEDEEE=DEEDDEEEEEE@EEEEEBDEDDEEEE	TRBV12-3*00(210),TRBV12-4*00(210)	TRBD1*00(30),TRBD2*00(30)	TRBJ1-1*00(220)		430|444|467|0|14||70.0;430|444|467|0|14||70.0	9|15|36|17|23||30.0;13|19|48|17|23||30.0	24|40|68|23|39||80.0		NA	NA	NA	NA	NA	NA	NA	NA	NA	NA	TGTGCCAGCAGTTTGGGCCCGGGCACTGAAGCTTTCTTT	28	NA	NA	NA	NA	NA	NA	NA	CASSLGPGTEAFF	NA	:::::::::0:-3:14:17:3:-9:23:23:-4:39:::
BM22	36	2	0.0204082	TGTGCCAGTAGTTTGGACCTAGATCAGCCCCAGCATTTT	EEEEDDEEEEEEDEDEECEEEECEEEEEBEBEEEEEEEE	TRBV19*00(184)		TRBJ1-5*00(225)		427|439|464|0|12||60.0		25|42|70|22|39||85.0		NA	NA	NA	NA	NA	NA	NA	NA	NA	NA	TGTGCCAGTAGTTTGGACCTAGATCAGCCCCAGCATTTT	33	NA	NA	NA	NA	NA	NA	NA	CASSLDLDQPQHF	NA	:::::::::0:-5:12:::::22:-5:39:::
BM22	37	2	0.0204082	TGTGCCAGCAGTTTAAGCGTGGGACACTTGAATCAGCCCCAGCATTTT	EEDC>DCC?ECDE?EEA>=DE=CD;D@EEDDEDDD@;68EE<DEEDDD	TRBV28*00(170)	TRBD1*00(30)	TRBJ1-5*00(230)		427|442|464|0|15||75.0	12|18|36|20|26||30.0	24|42|70|30|48||90.0		NA	NA	NA	NA	NA	NA	NA	NA	NA	NA	TGTGCCAGCAGTTTAAGCGTGGGACACTTGAATCAGCCCCAGCATTTT	21	NA	NA	NA	NA	NA	NA	NA	CASSLSVGHLNQPQHF	NA	:::::::::0:-2:15:20:0:-6:26:30:-4:48:::
BM22	38	2	0.0204082	TGTGCCAGCAGTTACTCGATTGAAGGAACTGAAGCTTTCTTT	=EDDDEDEECB;DE@EDAE9D>C@D?E@ED@EBDEDD<DDEE	TRBV6-2*00(220),TRBV6-3*00(220)		TRBJ1-1*00(199)		427|446|464|0|19||95.0;427|446|464|0|19||95.0		25|40|68|27|42||75.0		NA	NA	NA	NA	NA	NA	NA	NA	NA	NA	TGTGCCAGCAGTTACTCGATTGAAGGAACTGAAGCTTTCTTT	24	NA	NA	NA	NA	NA	NA	NA	CASSYSIEGTEAFF	NA	:::::::::0:2:19:::::27:-5:42:::
BM22	40	1	0.0102041	TGCGCCAGCAGTCCTGGGGACGAGCAGTACTTC	CED>?9DDEC?@@BACDDB=DDABBECDDAA8?	TRBV10-1*00(198),TRBV10-2*00(182)		TRBJ2-7*00(130)		427|439|464|0|12||60.0;427|439|464|0|12||60.0		25|39|67|19|33||70.0		NA	NA	NA	NA	NA	NA	NA	NA	NA	NA	TGCGCCAGCAGTCCTGGGGACGAGCAGTACTTC	23	NA	NA	NA	NA	NA	NA	NA	CASSPGDEQYF	NA	:::::::::0:-5:12:::::19:-5:33:::
BM22	41	1	0.0102041	TGTGCCAGCAGTCGCGAGGGGACTGAAGCTTTCTTT	EEEEEDEECEDAD?EEEEEEEDBEEDDE@EEEEEED	TRBV12-3*00(253),TRBV12-4*00(253)	TRBD1*00(25),TRBD2*00(25)	TRBJ1-1*00(215)		430|442|467|0|12||60.0;430|442|467|0|12||60.0	17|22|36|16|21||25.0;27|32|48|15|20||25.0	25|40|68|21|36||75.0		NA	NA	NA	NA	NA	NA	NA	NA	NA	NA	TGTGCCAGCAGTCGCGAGGGGACTGAAGCTTTCTTT	30	NA	NA	NA	NA	NA	NA	NA	CASSREGTEAFF	NA	:::::::::0:-5:12:16:-5:-2:21:21:-5:36:::
BM22	42	1	0.0102041	TGTGCCAGCAGCTATAGGGACAGAGCTCCTGAAGCTTTCTTT	?DCCADDDD@AC;=EBA@@ADCD6AD@CB>DD:C@C?<DDDD	TRBV12-3*00(164),TRBV12-4*00(164)	TRBD1*00(35)	TRBJ1-1*00(210)		430|441|467|0|11||55.0;430|441|467|0|11||55.0	12|19|36|16|23||35.0	26|40|68|28|42||70.0		NA	NA	NA	NA	NA	NA	NA	NA	NA	NA	TGTGCCAGCAGCTATAGGGACAGAGCTCCTGAAGCTTTCTTT	21	NA	NA	NA	NA	NA	NA	NA	CASSYRDRAPEAFF	NA	:::::::::0:-6:11:16:0:-5:23:28:-6:42:::
BM22	43	1	0.0102041	TGTGCCAGCAGCACCTCAGGAGACTATGGCTACACCTTC	EECEEEEEECEEDEEEE6EBDEECDDED>EEDE?FEEEE	TRBV12-3*00(248),TRBV12-4*00(248)		TRBJ1-2*00(125)		430|441|467|0|11||55.0;430|441|467|0|11||55.0		23|40|68|22|39||85.0		NA	NA	NA	NA	NA	NA	NA	NA	NA	NA	TGTGCCAGCAGCACCTCAGGAGACTATGGCTACACCTTC	21	NA	NA	NA	NA	NA	NA	NA	CASSTSGDYGYTF	NA	:::::::::0:-6:11:::::22:-3:39:::
BM22	45	1	0.0102041	TGTGCCAGCAGTTTAGGGCTAAGTAATCAGCCCCAGCATTTT	EEE?CDEDBEEEEEEEDEEDEEDEEEDEEDA?DEEADEEEEE	TRBV12-3*00(219),TRBV12-4*00(219)		TRBJ1-5*00(230)		430|452|467|0|22|SC446G|94.0;430|452|467|0|22|SC446G|94.0		24|42|70|24|42||90.0		NA	NA	NA	NA	NA	NA	NA	NA	NA	NA	TGTGCCAGCAGTTTAGGGCTAAGTAATCAGCCCCAGCATTTT	30	NA	NA	NA	NA	NA	NA	NA	CASSLGLSNQPQHF	NA	:::::::::0:5:22:::::24:-4:42:::
BM22	46	1	0.0102041	TGTGCCAGCAGTTACAGGGGGACAGCGGGAAGCACAGATACGCAGTATTTT	EEEEEEFEEEEECEFEEEEEEBFDEEEDECD8EEEECABEEC?E>CDE???	TRBV12-3*00(194),TRBV12-4*00(194)	TRBD1*00(40),TRBD2*00(39)	TRBJ2-3*00(90)		430|443|467|0|13||65.0;430|443|467|0|13||65.0	15|23|36|13|21||40.0;16|29|48|18|30|DT21|39.0	20|41|69|30|51||105.0		NA	NA	NA	NA	NA	NA	NA	NA	NA	NA	TGTGCCAGCAGTTACAGGGGGACAGCGGGAAGCACAGATACGCAGTATTTT	23	NA	NA	NA	NA	NA	NA	NA	CASSYRGTAGSTDTQYF	NA	:::::::::0:-4:13:13:-3:-1:21:30:0:51:::
BM22	47	1	0.0102041	TGTGCTAGTGGTATTGGGACTAGGACTAGCACAGATACGCAGTATTTT	EDEEC?DEEECEDCDEEEAEDDCCCECDEEBEEEECDEDCEEE:EE@E	TRBV12-5*00(140)	TRBD2*00(40)	TRBJ2-3*00(255)		430|442|467|0|12||60.0	16|24|48|15|23||40.0	18|41|69|25|48||115.0		NA	NA	NA	NA	NA	NA	NA	NA	NA	NA	TGTGCTAGTGGTATTGGGACTAGGACTAGCACAGATACGCAGTATTTT	25	NA	NA	NA	NA	NA	NA	NA	CASGIGTRTSTDTQYF	NA	:::::::::0:-5:12:15:0:-8:23:25:2:48:::
BM22	48	1	0.0102041	TGTGCCACCAGCACGGGACTATTCACAGATATGCAGTATTTT	EB?CEE7EEEEEDEECDDEEEEEEBEEDEDBEEEECEDBEBE	TRBV15*00(159)	TRBD2*00(40)	TRBJ2-3*00(219)		427|440|464|0|13||65.0	15|23|48|13|21||40.0	22|41|69|23|42|SC30T|79.0		NA	NA	NA	NA	NA	NA	NA	NA	NA	NA	TGTGCCACCAGCACGGGACTATTCACAGATATGCAGTATTTT	22	NA	NA	NA	NA	NA	NA	NA	CATSTGLFTDMQYF	NA	:::::::::0:-4:13:13:1:-9:21:23:-2:42:::
BM22	49	1	0.0102041	TGTGCCAGTAGTATAGCCTCCGGGACAGGGTATTTTGGCTACACCTTC	CCD@DC@BB6CD7<?=DBB7C:DACECD;B;9@ECED=B@6@7D<EDE	TRBV19*00(159)	TRBD1*00(55)	TRBJ1-2*00(125)		427|443|464|0|16||80.0	10|21|36|19|30||55.0	27|40|68|35|48||65.0		NA	NA	NA	NA	NA	NA	NA	NA	NA	NA	TGTGCCAGTAGTATAGCCTCCGGGACAGGGTATTTTGGCTACACCTTC	21	NA	NA	NA	NA	NA	NA	NA	CASSIASGTGYFGYTF	NA	:::::::::0:-1:16:19:2:-3:30:35:-7:48:::
BM22	50	1	0.0102041	TGTGCCAGTAGCCCTGGGCGTTATCAGCCCCAGCATTTT	ECEEDD>AEDEDDEEE8;AEAEDDDEADDDE@>@DEEBE	TRBV19*00(319)	TRBD1*00(25)	TRBJ1-5*00(94)		427|438|464|0|11||55.0	3|8|36|11|16||25.0	25|42|70|22|39||85.0		NA	NA	NA	NA	NA	NA	NA	NA	NA	NA	TGTGCCAGTAGCCCTGGGCGTTATCAGCCCCAGCATTTT	23	NA	NA	NA	NA	NA	NA	NA	CASSPGRYQPQHF	NA	:::::::::0:-6:11:11:9:-16:16:22:-5:39:::
BM22	52	1	0.0102041	TGTGCCAGTACCTCTCTGGGCCTACCCCTCCACTTT	EEEEE<E9CEEDEAEFEEE<6DEDEBEEEEEEEEAE	TRBV19*00(314)	TRBD2*00(25)	TRBJ1-6*00(89)		427|437|464|0|10||50.0	29|34|48|17|22||25.0	32|45|73|23|36||65.0		NA	NA	NA	NA	NA	NA	NA	NA	NA	NA	TGTGCCAGTACCTCTCTGGGCCTACCCCTCCACTTT	21	NA	NA	NA	NA	NA	NA	NA	CASTSLGLPLHF	NA	:::::::::0:-7:10:17:-13:2:22:23:-12:36:::
BM22	53	1	0.0102041	TGTGCCAGCAGTCGAAATGAGCAGTTCTTC	EEBEEEEEEEE=EEEEEBEEECED:EDCED	TRBV2*00(303)		TRBJ2-1*00(150)		430|442|467|0|12||60.0		27|42|70|15|30||75.0		NA	NA	NA	NA	NA	NA	NA	NA	NA	NA	TGTGCCAGCAGTCGAAATGAGCAGTTCTTC	25	NA	NA	NA	NA	NA	NA	NA	CASSRNEQFF	NA	:::::::::0:-5:12:::::15:-7:30:::
BM22	55	1	0.0102041	TGCAGTGCTAGAGTGGGGCAGGTGGAGACCCAGTACTTC	AD>CDCDDDEEDEE>BBCDDDCEEDEDDC6CE=DDCEEB	TRBV20-1*00(230)	TRBD1*00(25)	TRBJ2-5*00(215)		421|434|455|0|13||65.0	19|24|36|14|19||25.0	25|40|68|24|39||75.0		NA	NA	NA	NA	NA	NA	NA	NA	NA	NA	TGCAGTGCTAGAGTGGGGCAGGTGGAGACCCAGTACTTC	21	NA	NA	NA	NA	NA	NA	NA	CSARVGQVETQYF	NA	:::::::::0:-1:13:14:-7:0:19:24:-5:39:::
BM22	56	1	0.0102041	TGTGCCAGCAGTTTAATCGTGACAGGAGGAGCTTTCTTT	DECD@7CB;EDDAAE?CA9B@DCEECEB?D;8=EA@E?D	TRBV28*00(199)	TRBD1*00(30)	TRBJ1-1*00(190)		427|442|464|0|15||75.0	14|20|36|20|26||30.0	30|40|68|29|39||50.0		NA	NA	NA	NA	NA	NA	NA	NA	NA	NA	TGTGCCAGCAGTTTAATCGTGACAGGAGGAGCTTTCTTT	22	NA	NA	NA	NA	NA	NA	NA	CASSLIVTGGAFF	NA	:::::::::0:-2:15:20:-2:-4:26:29:-10:39:::
BM22	58	1	0.0102041	TGTGCCAGCACCCCGGGGGAGGTCTTAGGGGCCAACGTCCTGACTTTC	EFEEFCFCEDEEEEFDFEFDFEE>EDEFEEEBDDEEBEFEF;FEFEED	TRBV28*00(254)	TRBD1*00(30),TRBD2*00(30)	TRBJ2-6*00(213)		427|437|464|0|10||50.0	9|15|36|11|17||30.0;13|19|48|11|17||30.0	24|45|73|27|48||105.0		NA	NA	NA	NA	NA	NA	NA	NA	NA	NA	TGTGCCAGCACCCCGGGGGAGGTCTTAGGGGCCAACGTCCTGACTTTC	26	NA	NA	NA	NA	NA	NA	NA	CASTPGEVLGANVLTF	NA	:::::::::0:-7:10:11:3:-9:17:27:-4:48:::
BM22	59	1	0.0102041	TGTGCCAGCAGGCGACAGGGTAGACACGAGCAGTACTTC	E?E=<EEEB?DC?E<C?EDEEDEDD6EE?EDBED;BDEC	TRBV28*00(195)	TRBD1*00(35)	TRBJ2-7*00(210)		427|438|464|0|11||55.0	14|21|36|13|20||35.0	25|39|67|25|39||70.0		NA	NA	NA	NA	NA	NA	NA	NA	NA	NA	TGTGCCAGCAGGCGACAGGGTAGACACGAGCAGTACTTC	21	NA	NA	NA	NA	NA	NA	NA	CASRRQGRHEQYF	NA	:::::::::0:-6:11:13:-2:-3:20:25:-5:39:::
BM22	60	1	0.0102041	TGTGCCAGCAGTCCTAGGACAGGGCACTACGAGCAGTACTTC	EEEEE?EEEEEE@ADECEECEEEEEEEE;DEEDEEBEEEEEE	TRBV28*00(185)	TRBD1*00(40)	TRBJ2-7*00(220)		427|439|464|0|12||60.0	13|21|36|16|24||40.0	23|39|67|26|42||80.0		NA	NA	NA	NA	NA	NA	NA	NA	NA	NA	TGTGCCAGCAGTCCTAGGACAGGGCACTACGAGCAGTACTTC	26	NA	NA	NA	NA	NA	NA	NA	CASSPRTGHYEQYF	NA	:::::::::0:-5:12:16:-1:-3:24:26:-3:42:::
BM22	61	1	0.0102041	TGTGCCACCACCTGGGCGGGAGGGGCCTACGAGCAGTACTTC	BDC?6EAE<=A>:@BACDD@BAD=?BCD96D?6EDBD@AD>C	TRBV28*00(96)	TRBD2*00(45)	TRBJ2-7*00(225)		427|434|464|0|7||35.0	23|32|48|15|24||45.0	22|39|67|25|42||85.0		NA	NA	NA	NA	NA	NA	NA	NA	NA	NA	TGTGCCACCACCTGGGCGGGAGGGGCCTACGAGCAGTACTTC	21	NA	NA	NA	NA	NA	NA	NA	CATTWAGGAYEQYF	NA	:::::::::0:-10:7:15:-7:0:24:25:-2:42:::
BM22	62	1	0.0102041	TGTGCCAGCAGTGAAGCAGGTTTCCTCAAACTGTTTTTT	EEEEEEEEEEEBEEBEECDEEEEEEEEDEDEED6DEFEE	TRBV6-1*00(262),TRBV6-9*00(237)		TRBJ1-4*00(110)		427|444|464|0|17||85.0;427|439|464|0|12||60.0		31|43|71|27|39||60.0		NA	NA	NA	NA	NA	NA	NA	NA	NA	NA	TGTGCCAGCAGTGAAGCAGGTTTCCTCAAACTGTTTTTT	21	NA	NA	NA	NA	NA	NA	NA	CASSEAGFLKLFF	NA	:::::::::0:0:17:::::27:-11:39:::
BM22	63	1	0.0102041	TGTGCCAGCAGGGGACCGGGCCGGAACACCGGGGAGCTGTTTTTT	AE?EDEEE?ECEE=E@EEEEEAEEDAEDECEEEEEDEEECE@ECE	TRBV6-2*00(149),TRBV6-3*00(149),TRBV10-2*00(133)	TRBD1*00(29),TRBD2*00(25)	TRBJ2-2*00(234)		427|438|464|0|11||55.0;427|438|464|0|11||55.0;427|438|464|0|11|SC429T|39.0	12|21|36|11|20|SA17C|29.0;14|19|48|15|20||25.0	21|43|71|23|45||110.0		NA	NA	NA	NA	NA	NA	NA	NA	NA	NA	TGTGCCAGCAGGGGACCGGGCCGGAACACCGGGGAGCTGTTTTTT	28	NA	NA	NA	NA	NA	NA	NA	CASRGPGRNTGELFF	NA	:::::::::0:-6:11:11:0:-3:20:23:-1:45:::
BM22	64	1	0.0102041	TGTGCCAGCAGTGCACATAGCGGGAGATCCGGGGCCAACATCCTGACTTTC	E=EEEEEE?EE@EEDEECAEDEEEE@ADBEEEEDEEEEEEEEEEEEEEDCD	TRBV6-2*00(140),TRBV6-3*00(140)	TRBD2*00(30)	TRBJ2-6*00(147)		427|439|464|0|12||60.0;427|439|464|0|12||60.0	21|27|48|17|23||30.0	17|45|73|23|51|SC20AST23CSG33A|92.0		NA	NA	NA	NA	NA	NA	NA	NA	NA	NA	TGTGCCAGCAGTGCACATAGCGGGAGATCCGGGGCCAACATCCTGACTTTC	28	NA	NA	NA	NA	NA	NA	NA	CASSAHSGRSGANILTF	NA	:::::::::0:-5:12:17:-5:-5:23:23:3:51:::
BM22	65	1	0.0102041	TGTGCCAGCAGCGAAGACAGGGTCTACGAGCAGTACTTC	EEEEEEE9CEDDBEEEDEEDDADDE<DDEEEEEEEEEBC	TRBV6-2*00(195),TRBV6-3*00(195),TRBV6-1*00(188),TRBV6-5*00(179),TRBV6-6*00(179)	TRBD1*00(35)	TRBJ2-7*00(220)		427|438|464|0|11||55.0;427|438|464|0|11||55.0;427|443|464|0|16|ST438C|64.0;427|438|464|0|11||55.0;427|438|464|0|11||55.0	14|21|36|15|22||35.0	23|39|67|23|39||80.0		NA	NA	NA	NA	NA	NA	NA	NA	NA	NA	TGTGCCAGCAGCGAAGACAGGGTCTACGAGCAGTACTTC	24	NA	NA	NA	NA	NA	NA	NA	CASSEDRVYEQYF	NA	:::::::::0:-6:11:15:-2:-3:22:23:-3:39:::
BM22	67	1	0.0102041	TGTGCCAGCAGCCCTCGTGGGGGCACTGAAGCTTTCTTT	DEEEEEEEEEDEEEEEEEEEEEEEBEEEEECEEEEEEEE	TRBV6-1*00(195),TRBV6-5*00(195),TRBV6-6*00(195),TRBV6-2*00(179),TRBV6-3*00(179)	TRBD1*00(25),TRBD2*00(25)	TRBJ1-1*00(220)		427|438|464|0|11||55.0;427|438|464|0|11||55.0;427|438|464|0|11||55.0;427|438|464|0|11||55.0;427|438|464|0|11||55.0	18|23|36|18|23||25.0;0|5|48|11|16||25.0	24|40|68|23|39||80.0		NA	NA	NA	NA	NA	NA	NA	NA	NA	NA	TGTGCCAGCAGCCCTCGTGGGGGCACTGAAGCTTTCTTT	33	NA	NA	NA	NA	NA	NA	NA	CASSPRGGTEAFF	NA	:::::::::0:-6:11:18:-6:-1:23:23:-4:39:::
BM22	68	1	0.0102041	TGTGCCAGCAGTCGACAGGGCGGTCAGCCCCAGCATTTT	E?EEECDEED>EBEDDDEEDEEDEEDEEBEDBEBEEEEE	TRBV6-1*00(200),TRBV6-5*00(200),TRBV6-6*00(200),TRBV6-2*00(184),TRBV6-3*00(184)	TRBD1*00(35)	TRBJ1-5*00(220)		427|439|464|0|12||60.0;427|439|464|0|12||60.0;427|439|464|0|12||60.0;427|439|464|0|12||60.0;427|439|464|0|12||60.0	14|21|36|13|20||35.0	26|42|70|23|39||80.0		NA	NA	NA	NA	NA	NA	NA	NA	NA	NA	TGTGCCAGCAGTCGACAGGGCGGTCAGCCCCAGCATTTT	29	NA	NA	NA	NA	NA	NA	NA	CASSRQGGQPQHF	NA	:::::::::0:-5:12:13:-2:-3:20:23:-6:39:::
BM22	69	1	0.0102041	TGTGCCAGCAGTAGGGGTCGGATTGGTACGGTTGAGCAGTTCTTC	EDDDCDE=EEC>?DDEDDEDDBAD>DECECBECEDCECD??BB?E	TRBV6-1*00(150),TRBV6-4*00(150),TRBV6-5*00(150),TRBV6-6*00(150),TRBV6-2*00(134)	TRBD1*00(25)	TRBJ2-1*00(205)		427|439|464|0|12||60.0;427|439|464|0|12||60.0;427|439|464|0|12||60.0;427|439|464|0|12||60.0;427|439|464|0|12||60.0	17|22|36|12|17||25.0	29|42|70|32|45||65.0		NA	NA	NA	NA	NA	NA	NA	NA	NA	NA	TGTGCCAGCAGTAGGGGTCGGATTGGTACGGTTGAGCAGTTCTTC	28	NA	NA	NA	NA	NA	NA	NA	CASSRGRIGTVEQFF	NA	:::::::::0:-5:12:12:-5:-2:17:32:-9:45:::
BM22	70	1	0.0102041	TGTGCCAGCAGTTACCGGGCAGGGACAGATACGCAGTATTTT	D:ECB=ECDEAEC>8BACBEEB?CCDEDCDBCBDDAEDDDDE	TRBV6-5*00(185),TRBV6-6*00(185),TRBV6-1*00(170),TRBV6-2*00(169),TRBV6-3*00(169)	TRBD1*00(25)	TRBJ2-3*00(230)		427|442|464|0|15||75.0;427|442|464|0|15||75.0;427|439|464|0|12||60.0;427|442|464|0|15||75.0;427|442|464|0|15||75.0	16|21|36|19|24||25.0	23|41|69|24|42||90.0		NA	NA	NA	NA	NA	NA	NA	NA	NA	NA	TGTGCCAGCAGTTACCGGGCAGGGACAGATACGCAGTATTTT	23	NA	NA	NA	NA	NA	NA	NA	CASSYRAGTDTQYF	NA	:::::::::0:-2:15:19:-4:-3:24:24:-3:42:::
BM23	7	34	0.346939	TGTGCCAGCAGTTTAATGAGTGAGGCGGACACTGAAGCTTTCTTT	EEEEDEEEEEEEEEEEEEEEEEEEDEEEEEEEEEEEEEEEEEEEE	TRBV28*00(179)		TRBJ1-1*00(214.1)		427|442|464|0|15||75.0		23|40|68|28|45||85.0		NA	NA	NA	NA	NA	NA	NA	NA	NA	NA	TGTGCCAGCAGTTTAATGAGTGAGGCGGACACTGAAGCTTTCTTT	35	NA	NA	NA	NA	NA	NA	NA	CASSLMSEADTEAFF	NA	:::::::::0:-2:15:::::28:-3:45:::
BM23	50	11	0.112245	TGTGCCAGCAGTTACTCTCACCTGCCTGGGGGCTATGGCTACACCTTC	FFFFEFFFFFFEFEFFEFFEFFFFFFEFFFFEEFEFFEFFEFFFFEFE	TRBV6-9*00(247),TRBV6-6*00(246),TRBV6-1*00(237),TRBV6-5*00(230)	TRBD1*00(25)	TRBJ1-2*00(220)		427|441|464|0|14||70.0;427|444|464|0|17||85.0;427|439|464|0|12||60.0;427|444|464|0|17||85.0	18|23|36|27|32||25.0	24|40|68|32|48||80.0		NA	NA	NA	NA	NA	NA	NA	NA	NA	NA	TGTGCCAGCAGTTACTCTCACCTGCCTGGGGGCTATGGCTACACCTTC	36	NA	NA	NA	NA	NA	NA	NA	CASSYSHLPGGYGYTF	NA	:::::::::0:-3:14:27:-6:-1:32:32:-4:48:::
BM23	62	10	0.102041	TGTGCCAGCAGTGCAGATTTCCCAGGGATCTATAATTCACCCCTCCACTTT	EEEEDEEEEDEEDEEDEDECEDEEEDEEDDEEDDDEDEDEADAEBEAEEEE	TRBV6-1*00(144.1),TRBV6-4*00(144.1),TRBV6-5*00(139.1),TRBV6-6*00(139.1)	TRBD1*00(25)	TRBJ1-6*00(205.1)		427|440|464|0|13||65.0;427|440|464|0|13||65.0;427|439|464|0|12||60.0;427|439|464|0|12||60.0	16|21|36|22|27||25.0	23|45|73|29|51||110.0		NA	NA	NA	NA	NA	NA	NA	NA	NA	NA	TGTGCCAGCAGTGCAGATTTCCCAGGGATCTATAATTCACCCCTCCACTTT	32	NA	NA	NA	NA	NA	NA	NA	CASSADFPGIYNSPLHF	NA	:::::::::0:-4:13:22:-4:-3:27:29:-3:51:::
BM23	83	9	0.0918367	TGTGCCAGCAAACCAGGGGTGGAGAACACTGAAGCTTTCTTT	FFEFFFFEFFEEFFEFFFFEFFFFEEFFEEEEFEEFFFFFFF	TRBV6-4*00(241.2)	TRBD1*00(30)	TRBJ1-1*00(235)		427|437|464|0|10||50.0	16|22|36|13|19||30.0	21|40|68|23|42||95.0		NA	NA	NA	NA	NA	NA	NA	NA	NA	NA	TGTGCCAGCAAACCAGGGGTGGAGAACACTGAAGCTTTCTTT	36	NA	NA	NA	NA	NA	NA	NA	CASKPGVENTEAFF	NA	:::::::::0:-7:10:13:-4:-2:19:23:-1:42:::
BM23	84	9	0.0918367	TGTGCCAGCAGCCCAGAAGAGACCCAGTACTTC	FEFFFFFEFFEFFFFFFFFFEFFFFFEFEFFFF	TRBV7-9*00(359)		TRBJ2-5*00(225)		430|442|467|0|12||60.0		23|40|68|16|33||85.0		NA	NA	NA	NA	NA	NA	NA	NA	NA	NA	TGTGCCAGCAGCCCAGAAGAGACCCAGTACTTC	36	NA	NA	NA	NA	NA	NA	NA	CASSPEETQYF	NA	:::::::::0:-5:12:::::16:-3:33:::
BM23	183	3	0.0306122	TGTGCCAGCAGCTTAGAGGCAGTAGGGGTCTACGAGCAGTACTTC	EFEEEFEEEEFFEFEFEEEEEFEFEEFFEFEEFFEFFFEEEEEEE	TRBV7-6*00(353),TRBV7-7*00(321)	TRBD1*00(25)	TRBJ2-7*00(220)		430|446|467|0|16||80.0;430|446|467|0|16||80.0	17|22|36|23|28||25.0	23|39|67|29|45||80.0		NA	NA	NA	NA	NA	NA	NA	NA	NA	NA	TGTGCCAGCAGCTTAGAGGCAGTAGGGGTCTACGAGCAGTACTTC	36	NA	NA	NA	NA	NA	NA	NA	CASSLEAVGVYEQYF	NA	:::::::::0:-1:16:23:-5:-2:28:29:-3:45:::
BM23	203	2	0.0204082	TGTGCCAGCAGTCAGAACACCGGGGAGCTGTTTTTT	BEEDDEEEACE9DEB=CEC8DEDEEEEEEEECEEDE	TRBV27*00(107.5),TRBV2*00(99.5)		TRBJ2-2*00(250)		427|439|464|0|12||60.0;430|442|467|0|12||60.0		21|43|71|14|36||110.0		NA	NA	NA	NA	NA	NA	NA	NA	NA	NA	TGTGCCAGCAGTCAGAACACCGGGGAGCTGTTTTTT	23	NA	NA	NA	NA	NA	NA	NA	CASSQNTGELFF	NA	:::::::::0:-5:12:::::14:-1:36:::
BM23	204	2	0.0204082	TGTGCCAGCAGTTTATCACCGGGACAGCGTTATGGCTACACCTTC	EDECECDEEDEDDB@DECEDECBBCEEDEEDE?BEEA<E@EEEEE	TRBV28*00(229)	TRBD1*00(45)	TRBJ1-2*00(215)		427|443|464|0|16||80.0	10|19|36|18|27||45.0	25|40|68|30|45||75.0		NA	NA	NA	NA	NA	NA	NA	NA	NA	NA	TGTGCCAGCAGTTTATCACCGGGACAGCGTTATGGCTACACCTTC	27	NA	NA	NA	NA	NA	NA	NA	CASSLSPGQRYGYTF	NA	:::::::::0:-1:16:18:2:-5:27:30:-5:45:::
BM23	220	1	0.0102041	TGCGCCAGCTCCCAGGTCGCCTACAATGAGCAGTTCTTC	EEEEEEEEEEEEEEEE8EEEEEEEEEBEEEECEDDDEEE	TRBV10-1*00(253)		TRBJ2-1*00(240)		427|436|464|0|9||45.0		22|42|70|19|39||100.0		NA	NA	NA	NA	NA	NA	NA	NA	NA	NA	TGCGCCAGCTCCCAGGTCGCCTACAATGAGCAGTTCTTC	23	NA	NA	NA	NA	NA	NA	NA	CASSQVAYNEQFF	NA	:::::::::0:-8:9:::::19:-2:39:::
BM23	221	1	0.0102041	TGTGCCATCAGTGAAGGTGGAAACACCATATATTTT	EE=EDDCDEEEEEEEDEBEEEDEEC@EEEEEEEEEE	TRBV10-3*00(209)		TRBJ1-3*00(235)		427|441|464|0|14||70.0		23|42|70|17|36||95.0		NA	NA	NA	NA	NA	NA	NA	NA	NA	NA	TGTGCCATCAGTGAAGGTGGAAACACCATATATTTT	28	NA	NA	NA	NA	NA	NA	NA	CAISEGGNTIYF	NA	:::::::::0:-3:14:::::17:-3:36:::
BM23	222	1	0.0102041	TGTGCCATCAGTCCTACAGGTTCTCCACCCTACGAGCAGTACTTC	EEBECEDE<EE8?EDDDE9@>EEF;DEEFDDCEDEC89EEE9D>E	TRBV10-3*00(236)	TRBD1*00(25)	TRBJ2-7*00(120)		427|439|464|0|12||60.0	15|20|36|15|20||25.0	22|39|67|28|45||85.0		NA	NA	NA	NA	NA	NA	NA	NA	NA	NA	TGTGCCATCAGTCCTACAGGTTCTCCACCCTACGAGCAGTACTTC	23	NA	NA	NA	NA	NA	NA	NA	CAISPTGSPPYEQYF	NA	:::::::::0:-5:12:15:-3:-4:20:28:-2:45:::
BM23	223	1	0.0102041	TGTGCCAGCAGATTAGCGGGTGCAGGGTACAATGAGCAGTTCTTC	CEE@6DDD9EBEDEDD;EDECDBBDDEEECECDEEDCEBCEDA=C	TRBV12-3*00(184),TRBV12-4*00(184)	TRBD1*00(25)	TRBJ2-1*00(214)		430|448|467|0|18|ST441A|74.0;430|448|467|0|18|ST441A|74.0	16|21|36|22|27||25.0	24|42|70|27|45||90.0		NA	NA	NA	NA	NA	NA	NA	NA	NA	NA	TGTGCCAGCAGATTAGCGGGTGCAGGGTACAATGAGCAGTTCTTC	21	NA	NA	NA	NA	NA	NA	NA	CASRLAGAGYNEQFF	NA	:::::::::0:1:18:22:-4:-3:27:27:-4:45:::
BM23	224	1	0.0102041	TGTGCCAGCAGTCTGACATTAAATTCCTACGAGCAGTACTTC	EEEFEEEEEEFEEEEEEEEFEEEEEEEEEEEEFEEEEEFEEE	TRBV12-3*00(253),TRBV12-4*00(253)		TRBJ2-7*00(198)		430|442|467|0|12||60.0;430|442|467|0|12||60.0		21|39|67|24|42||90.0		NA	NA	NA	NA	NA	NA	NA	NA	NA	NA	TGTGCCAGCAGTCTGACATTAAATTCCTACGAGCAGTACTTC	36	NA	NA	NA	NA	NA	NA	NA	CASSLTLNSYEQYF	NA	:::::::::0:-5:12:::::24:-1:42:::
BM23	226	1	0.0102041	TGTGCCAGTTCAGTGCAGGCCAACACTGAAGCTTTCTTT	EEEDEDEEEEECEDEEEEEEEEEEEEEEEDEEEDDFEEF	TRBV19*00(309)		TRBJ1-1*00(230)		427|436|464|0|9||45.0		22|40|68|21|39||90.0		NA	NA	NA	NA	NA	NA	NA	NA	NA	NA	TGTGCCAGTTCAGTGCAGGCCAACACTGAAGCTTTCTTT	34	NA	NA	NA	NA	NA	NA	NA	CASSVQANTEAFF	NA	:::::::::0:-8:9:::::21:-2:39:::
BM23	227	1	0.0102041	TGTGCCAGTAGTCTAGGAATAGCGGGAGTTATTGAGCAGTTCTTC	:DBE<ECEBDDCB@DECEE;DDAEEDDEDED?6=DECBDDCDAAB	TRBV19*00(154)	TRBD2*00(45)	TRBJ2-1*00(205)		427|443|464|0|16|SA439C|64.0	21|30|48|19|28||45.0	29|42|70|32|45||65.0		NA	NA	NA	NA	NA	NA	NA	NA	NA	NA	TGTGCCAGTAGTCTAGGAATAGCGGGAGTTATTGAGCAGTTCTTC	21	NA	NA	NA	NA	NA	NA	NA	CASSLGIAGVIEQFF	NA	:::::::::0:-1:16:19:-5:-2:28:32:-9:45:::
BM23	228	1	0.0102041	TGCAGTGCCAAAACTGTCTTGGATACGCAGTATTTT	FEC>EEEEEE<DBEEEEEEEEE<7BE<=6EEEC6@@	TRBV20-1*00(378)	TRBD1*00(25)	TRBJ2-3*00(215)		421|429|455|0|8||40.0	5|10|36|13|18||25.0	26|41|69|21|36||75.0		NA	NA	NA	NA	NA	NA	NA	NA	NA	NA	TGCAGTGCCAAAACTGTCTTGGATACGCAGTATTTT	21	NA	NA	NA	NA	NA	NA	NA	CSAKTVLDTQYF	NA	:::::::::0:-6:8:13:7:-14:18:21:-6:36:::
BM23	229	1	0.0102041	TGTGCCAGCAGGCTGGGGGACGGGAATCAGCCCCAGCATTTT	FEEEEEEEEFEFEEEEEEEDEEEEFEEEEEEEFEEEEEEFEF	TRBV27*00(248)	TRBD1*00(25),TRBD2*00(25)	TRBJ1-5*00(230)		427|438|464|0|11||55.0	12|17|36|16|21||25.0;16|21|48|16|21||25.0	24|42|70|24|42||90.0		NA	NA	NA	NA	NA	NA	NA	NA	NA	NA	TGTGCCAGCAGGCTGGGGGACGGGAATCAGCCCCAGCATTTT	35	NA	NA	NA	NA	NA	NA	NA	CASRLGDGNQPQHF	NA	:::::::::0:-6:11:16:0:-7:21:24:-4:42:::
BM23	230	1	0.0102041	TGTGCCAGCATTAAGGGACAGGGTTATCAGCCCCAGCATTTT	EEEEEEDEEEDEEEEEE7CEFEECEEEECEECEEEEEEEEED	TRBV28*00(254)	TRBD1*00(45)	TRBJ1-5*00(225)		427|437|464|0|10||50.0	12|21|36|14|23||45.0	25|42|70|25|42||85.0		NA	NA	NA	NA	NA	NA	NA	NA	NA	NA	TGTGCCAGCATTAAGGGACAGGGTTATCAGCCCCAGCATTTT	22	NA	NA	NA	NA	NA	NA	NA	CASIKGQGYQPQHF	NA	:::::::::0:-7:10:14:0:-3:23:25:-5:42:::
BM23	231	1	0.0102041	TGTGCCAGCAGTGAAAACCTGGGTATGTACGAGCAGTACTTC	CDEEEDEEEDDEADDECBBDDEED6EED@=EDEDDBD6EEAD	TRBV6-1*00(184),TRBV6-5*00(169),TRBV6-6*00(169)		TRBJ2-7*00(215)		427|442|464|0|15||75.0;427|439|464|0|12||60.0;427|439|464|0|12||60.0		24|39|67|27|42||75.0		NA	NA	NA	NA	NA	NA	NA	NA	NA	NA	TGTGCCAGCAGTGAAAACCTGGGTATGTACGAGCAGTACTTC	21	NA	NA	NA	NA	NA	NA	NA	CASSENLGMYEQYF	NA	:::::::::0:-2:15:::::27:-4:42:::
BM23	232	1	0.0102041	TGTGCCAGCGGGACAGGGATTCGCTGGGACACTGAAGCTTTCTTT	DEEECDEECEEEEEEEEE?DEEEEEEEEEE;EEEEE@EEEDECDE	TRBV6-1*00(155),TRBV6-5*00(155),TRBV6-6*00(155),TRBV10-3*00(145),TRBV6-8*00(139)	TRBD1*00(45)	TRBJ1-1*00(225)		427|436|464|0|9||45.0;427|436|464|0|9||45.0;427|436|464|0|9||45.0;427|434|464|0|7||35.0;424|433|461|0|9||45.0	12|21|36|9|18||45.0	23|40|68|28|45||85.0		NA	NA	NA	NA	NA	NA	NA	NA	NA	NA	TGTGCCAGCGGGACAGGGATTCGCTGGGACACTGAAGCTTTCTTT	26	NA	NA	NA	NA	NA	NA	NA	CASGTGIRWDTEAFF	NA	:::::::::0:-8:9:9:0:-3:18:28:-3:45:::
BM23	233	1	0.0102041	TGTGCCAGCAGTTACTCGCCGGGGCAAGAGACCCAGTACTTC	EDECDEEEDAEDDBB<DDBDEDBEEB6DEECDDCACABE=DB	TRBV6-5*00(240),TRBV6-6*00(240),TRBV6-2*00(224),TRBV6-3*00(224),TRBV6-8*00(224)	TRBD1*00(25),TRBD2*00(25)	TRBJ2-5*00(230)		427|445|464|0|18||90.0;427|445|464|0|18||90.0;427|445|464|0|18||90.0;427|445|464|0|18||90.0;424|442|461|0|18||90.0	10|15|36|18|23||25.0;14|19|48|18|23||25.0	22|40|68|24|42||90.0		NA	NA	NA	NA	NA	NA	NA	NA	NA	NA	TGTGCCAGCAGTTACTCGCCGGGGCAAGAGACCCAGTACTTC	21	NA	NA	NA	NA	NA	NA	NA	CASSYSPGQETQYF	NA	:::::::::0:1:18:18:2:-9:23:24:-2:42:::
BM23	234	1	0.0102041	TGTGCCAGCAGCTACCTCCGAGGACAGCAAGAGACCCAGTACTTC	EAEEEEEEEECDEEECDD@EDEE;DEEEEEAEECDBEEEEDEEEE	TRBV6-5*00(194),TRBV6-6*00(194),TRBV6-1*00(190),TRBV6-2*00(178),TRBV6-3*00(178)	TRBD1*00(30)	TRBJ2-5*00(230)		427|442|464|0|15|ST438C|59.0;427|442|464|0|15|ST438C|59.0;427|438|464|0|11||55.0;427|442|464|0|15|ST438C|59.0;427|442|464|0|15|ST438C|59.0	13|19|36|21|27||30.0	22|40|68|27|45||90.0		NA	NA	NA	NA	NA	NA	NA	NA	NA	NA	TGTGCCAGCAGCTACCTCCGAGGACAGCAAGAGACCCAGTACTTC	26	NA	NA	NA	NA	NA	NA	NA	CASSYLRGQQETQYF	NA	:::::::::0:-2:15:21:-1:-5:27:27:-2:45:::
BM23	235	1	0.0102041	TGTGCCAGCAGCTATGGGGGCGGGAGTGAGTACGAGCAGTACTTC	AD?CD7=EC7;CBD@BEDDD:EE?DEECCECD;BEDDDBD9C@<E	TRBV6-1*00(165),TRBV6-5*00(165),TRBV6-6*00(165),TRBV6-9*00(153),TRBV6-2*00(149)	TRBD1*00(35),TRBD2*00(35)	TRBJ2-7*00(215)		427|438|464|0|11||55.0;427|438|464|0|11||55.0;427|438|464|0|11||55.0;427|442|464|0|15|ST438C|59.0;427|438|464|0|11||55.0	18|25|36|15|22||35.0;23|30|48|19|26||35.0	24|39|67|30|45||75.0		NA	NA	NA	NA	NA	NA	NA	NA	NA	NA	TGTGCCAGCAGCTATGGGGGCGGGAGTGAGTACGAGCAGTACTTC	22	NA	NA	NA	NA	NA	NA	NA	CASSYGGGSEYEQYF	NA	:::::::::0:-6:11:15:-6:1:22:30:-4:45:::
BM23	236	1	0.0102041	TGTGCCAGCAGCTTCGCACAGAACACTGAAGCTTTCTTT	EEEEEEEEEEEFEEEEEEEEEEEEEEEEDEEEEEEEEEE	TRBV7-3*00(327),TRBV7-2*00(305),TRBV7-4*00(295)		TRBJ1-1*00(235)		430|444|467|0|14||70.0;430|444|467|0|14||70.0;430|444|467|0|14||70.0		21|40|68|20|39||95.0		NA	NA	NA	NA	NA	NA	NA	NA	NA	NA	TGTGCCAGCAGCTTCGCACAGAACACTGAAGCTTTCTTT	35	NA	NA	NA	NA	NA	NA	NA	CASSFAQNTEAFF	NA	:::::::::0:-3:14:::::20:-1:39:::
BM23	237	1	0.0102041	TGTGCCAGCAGTCGTCGACTAGCGGGAGGGCCACCCGAGACCCAGTACTTC	EEEEEEEEEEEEEEEEEEEEEEEEEEEEFDEEEEEEEEEDECEDEEEEEE9	TRBV7-8*00(344),TRBV7-2*00(322)	TRBD2*00(80)	TRBJ2-5*00(215)		430|441|467|0|11||55.0;430|441|467|0|11||55.0	18|34|48|16|32||80.0	25|40|68|36|51||75.0		NA	NA	NA	NA	NA	NA	NA	NA	NA	NA	TGTGCCAGCAGTCGTCGACTAGCGGGAGGGCCACCCGAGACCCAGTACTTC	24	NA	NA	NA	NA	NA	NA	NA	CASSRRLAGGPPETQYF	NA	:::::::::0:-6:11:16:-2:2:32:36:-5:51:::
BM23	238	1	0.0102041	TGTGCCAGCAGCTTAGGGGACAGGGAGCAGTACTTC	DEEEEEEEEEEEDEEEEEEEEEEEEEEEEEEEEEEE	TRBV7-9*00(235)	TRBD1*00(40)	TRBJ2-7*00(200)		430|446|467|0|16||80.0	12|20|36|16|24||40.0	27|39|67|24|36||60.0		NA	NA	NA	NA	NA	NA	NA	NA	NA	NA	TGTGCCAGCAGCTTAGGGGACAGGGAGCAGTACTTC	35	NA	NA	NA	NA	NA	NA	NA	CASSLGDREQYF	NA	:::::::::0:-1:16:16:0:-4:24:24:-7:36:::
BM24	0	101	0.404	TGTGCCAGCAGCTTATATGACAGGGTGGACACTGAAGCTTTCTTT	FFFFFFFFFFFFFFFFFFFFFFFFFFFFFFFFFFFFFFFFFFFFF	TRBV11-1*00(426.3),TRBV11-3*00(410.3)	TRBD1*00(35)	TRBJ1-1*00(161.6)		430|445|467|0|15||75.0;430|445|467|0|15||75.0	14|21|36|18|25||35.0	23|40|68|28|45||85.0		NA	NA	NA	NA	NA	NA	NA	NA	NA	NA	TGTGCCAGCAGCTTATATGACAGGGTGGACACTGAAGCTTTCTTT	37	NA	NA	NA	NA	NA	NA	NA	CASSLYDRVDTEAFF	NA	:::::::::0:-2:15:18:-2:-3:25:28:-3:45:::
BM24	2	67	0.268	TGTGCCACCAGCAGAGATTGGGGAACAGGGAGGGATGAAAAACTGTTTTTT	FFFFFFFFFFFFFFFFFFFFFFFFFFFFFFFFFFFFFFFFFFFFFFFFFFF	TRBV15*00(289.5)	TRBD2*00(35),TRBD1*00(30)	TRBJ1-4*00(205.1)		427|445|464|0|18||90.0	25|32|48|27|34||35.0;15|21|36|24|30||30.0	26|43|71|34|51||85.0		NA	NA	NA	NA	NA	NA	NA	NA	NA	NA	TGTGCCACCAGCAGAGATTGGGGAACAGGGAGGGATGAAAAACTGTTTTTT	37	NA	NA	NA	NA	NA	NA	NA	CATSRDWGTGRDEKLFF	NA	:::::::::0:1:18:27:-9:0:34:34:-6:51:::
BM24	6	47	0.188	TGTGCCAGCAGTCTCAAATGGACCGTGAACACTGAAGCTTTCTTT	FFFFFFFFFFFFFFFFFFFFFFFFFFFFFFFFFFFFFFFFFFFFF	TRBV6-5*00(236.3),TRBV6-1*00(236),TRBV6-8*00(236),TRBV6-6*00(215.5)		TRBJ1-1*00(240)		427|439|464|0|12||60.0;427|439|464|0|12||60.0;424|436|461|0|12||60.0;427|439|464|0|12||60.0		20|40|68|25|45||100.0		NA	NA	NA	NA	NA	NA	NA	NA	NA	NA	TGTGCCAGCAGTCTCAAATGGACCGTGAACACTGAAGCTTTCTTT	37	NA	NA	NA	NA	NA	NA	NA	CASSLKWTVNTEAFF	NA	:::::::::0:-5:12:::::25:0:45:::
BM24	9	33	0.132	TGTGCCAGCAGCACGCCCGGCTCAACTAATGAAAAACTGTTTTTT	FFFFFFFFFFFFFFFFFFFFFFFFFFFFFFFFFFFFFFFFFFFFF	TRBV28*00(259)	TRBD1*00(25),TRBD2*00(25)	TRBJ1-4*00(245)		427|438|464|0|11||55.0	9|14|36|15|20||25.0;13|18|48|15|20||25.0	20|43|71|22|45||115.0		NA	NA	NA	NA	NA	NA	NA	NA	NA	NA	TGTGCCAGCAGCACGCCCGGCTCAACTAATGAAAAACTGTTTTTT	37	NA	NA	NA	NA	NA	NA	NA	CASSTPGSTNEKLFF	NA	:::::::::0:-6:11:15:3:-10:20:22:0:45:::
BM24	10	2	0.008	TGTGCCACCAGCAGAGTTGGGGGGGGAAGCACAGATACGCAGTATTTT	EEEEEEEEFEEEEEDEDEEEEEEEEEEEEEEEEEEEEEFDEEEEEEEE	TRBV15*00(277)	TRBD1*00(25)	TRBJ2-3*00(245)		427|443|464|0|16||80.0	18|23|36|18|23||25.0	20|41|69|27|48||105.0		NA	NA	NA	NA	NA	NA	NA	NA	NA	NA	TGTGCCACCAGCAGAGTTGGGGGGGGAAGCACAGATACGCAGTATTTT	35	NA	NA	NA	NA	NA	NA	NA	CATSRVGGGSTDTQYF	NA	:::::::::0:-1:16:18:-6:-1:23:27:0:48:::
BM25	1	115	0.598958	TGTGCCTGGGAGGGACCTAACAATGGCTACACCTTC	FFFFFEEFFFFFFFFFFFFEFFEFFFFEEFEEFFFF	TRBV30*00(444.4)	TRBD1*00(25),TRBD2*00(25)	TRBJ1-2*00(224)		421|430|455|0|9||45.0	12|17|36|11|16||25.0;16|21|48|11|16||25.0	20|40|68|16|36|ST25A|84.0		NA	NA	NA	NA	NA	NA	NA	NA	NA	NA	TGTGCCTGGGAGGGACCTAACAATGGCTACACCTTC	36	NA	NA	NA	NA	NA	NA	NA	CAWEGPNNGYTF	NA	:::::::::0:-5:9:11:0:-7:16:16:0:36:::
BM25	3	77	0.401042	TGTGCCACCAGAGGGGGCACCTCAACAAACACCATATATTTT	FFFFFFFFFFFFFFFFFFFFFFFFFFFFFFFFFFFFFFFFFF	TRBV12-3*00(185.4),TRBV12-4*00(185.4)	TRBD1*00(35)	TRBJ1-3*00(219.8)		430|441|467|0|11|SG437C|39.0;430|441|467|0|11|SG437C|39.0	17|24|36|11|18||35.0	26|42|70|26|42||80.0		NA	NA	NA	NA	NA	NA	NA	NA	NA	NA	TGTGCCACCAGAGGGGGCACCTCAACAAACACCATATATTTT	37	NA	NA	NA	NA	NA	NA	NA	CATRGGTSTNTIYF	NA	:::::::::0:-6:11:11:-5:0:18:26:-6:42:::
BM26	3	4	0.0833333	TGTGCCAGCAGTGAAGCGGCGGTTCTTGGCTACGAGCAGTACTTC	BDEEBEEEEEEDDDDC?DC7CECCDDEEEED;EECEEDDEDE@DA	TRBV2*00(200)		TRBJ2-7*00(193.3)		430|448|467|0|18||90.0		23|39|67|29|45||80.0		NA	NA	NA	NA	NA	NA	NA	NA	NA	NA	TGTGCCAGCAGTGAAGCGGCGGTTCTTGGCTACGAGCAGTACTTC	22	NA	NA	NA	NA	NA	NA	NA	CASSEAAVLGYEQYF	NA	:::::::::0:1:18:::::29:-3:45:::
BM26	4	4	0.0833333	TGTGCCAGCAGCCTCCGACCTAGTGGAAACACCATATATTTT	EEFEFEEEEFEEFEFEEEEFEFEEEFFFEEEEEEEFFFEFFF	TRBV28*00(261)	TRBD2*00(25)	TRBJ1-3*00(132)		427|438|464|0|11||55.0	1|6|48|11|16||25.0	23|42|70|23|42||95.0		NA	NA	NA	NA	NA	NA	NA	NA	NA	NA	TGTGCCAGCAGCCTCCGACCTAGTGGAAACACCATATATTTT	36	NA	NA	NA	NA	NA	NA	NA	CASSLRPSGNTIYF	NA	:::::::::0:-6:11:11:15:-26:16:23:-3:42:::
BM26	5	3	0.0625	TGTGCCAGCAGCCAATGGGGGACGTTAAATGGCTACACCTTC	EEEEEDEEECDDEEDEEEEEEEEEBEEEDEEEECAE@EDCCE	TRBV16*00(189)	TRBD1*00(25),TRBD2*00(25)	TRBJ1-2*00(204.7)		430|446|467|0|16||80.0	12|17|36|18|23||25.0;16|21|48|18|23||25.0	26|40|68|28|42||70.0		NA	NA	NA	NA	NA	NA	NA	NA	NA	NA	TGTGCCAGCAGCCAATGGGGGACGTTAAATGGCTACACCTTC	31	NA	NA	NA	NA	NA	NA	NA	CASSQWGTLNGYTF	NA	:::::::::0:-1:16:18:0:-7:23:28:-6:42:::
BM26	6	3	0.0625	TGTGCCAGTAGTAATACATATAGCAATCAGCCCCAGCATTTT	DDDBA@EDDEEEEDDBD:ECDDDBB;;B=C>@=AD:8CAEEE	TRBV19*00(167.5)		TRBJ1-5*00(260)		427|440|464|0|13||65.0		18|42|70|18|42||120.0		NA	NA	NA	NA	NA	NA	NA	NA	NA	NA	TGTGCCAGTAGTAATACATATAGCAATCAGCCCCAGCATTTT	23	NA	NA	NA	NA	NA	NA	NA	CASSNTYSNQPQHF	NA	:::::::::0:-4:13:::::18:2:42:::
BM26	7	3	0.0625	TGCAGTGCTAGCCCAATAGCATCAGAATGGGGAGATACGCAGTATTTT	EEEEFEEEEEEEEEEEEEEEEEEEEEEEEEEEEFEEEEEEEEEEEEEE	TRBV20-1*00(393)		TRBJ2-3*00(220)		421|432|455|0|11||55.0		25|41|69|32|48||80.0		NA	NA	NA	NA	NA	NA	NA	NA	NA	NA	TGCAGTGCTAGCCCAATAGCATCAGAATGGGGAGATACGCAGTATTTT	36	NA	NA	NA	NA	NA	NA	NA	CSASPIASEWGDTQYF	NA	:::::::::0:-3:11:::::32:-5:48:::
BM26	9	3	0.0625	TGTGCCAGCAGTTTGACAGGTCTGTCGAACAATGAGCAGTTCTTC	DECBECDDEDEEECEECECEDBEEDDDE@EBDEEEEECEECBECC	TRBV6-5*00(173.3),TRBV6-6*00(173.3),TRBV6-1*00(168.3)	TRBD1*00(30)	TRBJ2-1*00(205.7)		427|440|464|0|13||65.0;427|440|464|0|13||65.0;427|439|464|0|12||60.0	14|20|36|14|20||30.0	25|42|70|28|45||85.0		NA	NA	NA	NA	NA	NA	NA	NA	NA	NA	TGTGCCAGCAGTTTGACAGGTCTGTCGAACAATGAGCAGTTCTTC	31	NA	NA	NA	NA	NA	NA	NA	CASSLTGLSNNEQFF	NA	:::::::::0:-4:13:14:-2:-4:20:28:-5:45:::
BM26	10	2	0.0416667	TGTGCCAGCAGCCGCACAGGAACCTCCGAGCAGTACTTC	EEEEEEEEEEEFEEFEEEEEEEEEEEEEEEEEEEEEEEE	TRBV12-3*00(248),TRBV12-4*00(248)	TRBD1*00(25)	TRBJ2-7*00(209)		430|441|467|0|11||55.0;430|441|467|0|11||55.0	15|20|36|15|20||25.0	22|39|67|22|39|SA25C|69.0		NA	NA	NA	NA	NA	NA	NA	NA	NA	NA	TGTGCCAGCAGCCGCACAGGAACCTCCGAGCAGTACTTC	36	NA	NA	NA	NA	NA	NA	NA	CASSRTGTSEQYF	NA	:::::::::0:-6:11:15:-3:-4:20:22:-2:39:::
BM26	11	2	0.0416667	TGTGCCACCAGCAGAGTAATGGGAGGCTCCTATAATTCACCCCTCCACTTT	DDEEED=BEBE<DEEECBBEDDBCCECDEEA@EDEDDECA;CECEBDCDDD	TRBV15*00(144)	TRBD2*00(25)	TRBJ1-6*00(270)		427|443|464|0|16||80.0	25|30|48|20|25||25.0	19|45|73|25|51||130.0		NA	NA	NA	NA	NA	NA	NA	NA	NA	NA	TGTGCCACCAGCAGAGTAATGGGAGGCTCCTATAATTCACCCCTCCACTTT	26	NA	NA	NA	NA	NA	NA	NA	CATSRVMGGSYNSPLHF	NA	:::::::::0:-1:16:20:-9:-2:25:25:1:51:::
BM26	12	2	0.0416667	TGTGCCAGCAGTGCCATGAGGGGCACTGAAGCTTTCATT	EECEBEEDEEECEBEEEEEEDEEEEEE;EDCEEEDDEEE	TRBV2*00(205)	TRBD1*00(25),TRBD2*00(25)	TRBJ1-1*00(204)		430|443|467|0|13||65.0	17|22|36|18|23||25.0;27|32|48|17|22||25.0	24|40|68|23|39|ST37A|64.0		NA	NA	NA	NA	NA	NA	NA	NA	NA	NA	TGTGCCAGCAGTGCCATGAGGGGCACTGAAGCTTTCATT	26	NA	NA	NA	NA	NA	NA	NA	CASSAMRGTEAFI	NA	:::::::::0:-4:13:18:-5:-2:23:23:-4:39:::
BM26	13	2	0.0416667	TGTGCCAGCAGTGAGGACAGGAGGGACACTGAAGCTTTCTTT	EECC<=DC?CEEBEEA=@BED8DE?BEEE@DCB?CDEDCEAE	TRBV2*00(187)	TRBD1*00(35),TRBD2*00(30)	TRBJ1-1*00(225)		430|444|467|0|14||70.0	13|20|36|14|21||35.0;26|32|48|19|25||30.0	23|40|68|25|42||85.0		NA	NA	NA	NA	NA	NA	NA	NA	NA	NA	TGTGCCAGCAGTGAGGACAGGAGGGACACTGAAGCTTTCTTT	23	NA	NA	NA	NA	NA	NA	NA	CASSEDRRDTEAFF	NA	:::::::::0:-3:14:14:-1:-4:21:25:-3:42:::
BM26	14	2	0.0416667	TGCAGTGCTAGGAGCCCGGGACAGCCAAAGTCACCCCTCCACTTT	FEEEEEEEEEDFEFEEEEFEEEEEEEEEEEEFEEEEEEEEEEEEF	TRBV20-1*00(393)	TRBD1*00(50)	TRBJ1-6*00(215)		421|432|455|0|11||55.0	9|19|36|14|24||50.0	30|45|73|30|45||75.0		NA	NA	NA	NA	NA	NA	NA	NA	NA	NA	TGCAGTGCTAGGAGCCCGGGACAGCCAAAGTCACCCCTCCACTTT	35	NA	NA	NA	NA	NA	NA	NA	CSARSPGQPKSPLHF	NA	:::::::::0:-3:11:14:3:-5:24:30:-10:45:::
BM26	15	2	0.0416667	TGTGCCACCAGGAGTGGGGGATACAATGGGCAGTTCTTC	EEEEEEFEEEEEEEEEFEEFEFEEFEFFEEEEEEEEEFE	TRBV24-1*00(262)	TRBD1*00(25)	TRBJ2-1*00(214)		427|438|465|0|11||55.0	18|23|36|15|20||25.0	24|42|70|21|39|SA31G|74.0		NA	NA	NA	NA	NA	NA	NA	NA	NA	NA	TGTGCCACCAGGAGTGGGGGATACAATGGGCAGTTCTTC	36	NA	NA	NA	NA	NA	NA	NA	CATRSGGYNGQFF	NA	:::::::::0:-7:11:15:-6:-1:20:21:-4:39:::
BM26	16	2	0.0416667	TGTGCCACCAGTGCGGGCTACGAGCAGTACTTC	FEAEEEEEEEEEECEEEEEEEEEEEEFEEEE;@	TRBV24-1*00(280)		TRBJ2-7*00(152)		427|440|465|0|13||65.0		23|39|67|17|33||80.0		NA	NA	NA	NA	NA	NA	NA	NA	NA	NA	TGTGCCACCAGTGCGGGCTACGAGCAGTACTTC	26	NA	NA	NA	NA	NA	NA	NA	CATSAGYEQYF	NA	:::::::::0:-5:13:::::17:-3:33:::
BM26	17	1	0.0208333	TGTGCCATCAGTGACGAACAGACTAACGGCTACACCTTC	EEEEEECFEEEEEEEDEEEEEDEFDCEEEEEEEBDEEED	TRBV10-3*00(194)	TRBD2*00(25)	TRBJ1-2*00(200)		427|441|464|0|14||70.0	18|23|48|20|25||25.0	28|40|68|27|39||60.0		NA	NA	NA	NA	NA	NA	NA	NA	NA	NA	TGTGCCATCAGTGACGAACAGACTAACGGCTACACCTTC	33	NA	NA	NA	NA	NA	NA	NA	CAISDEQTNGYTF	NA	:::::::::0:-3:14:20:-2:-9:25:27:-8:39:::
BM26	18	1	0.0208333	TGTGCCAGCCATGTCGGGACAGGGGGACTCGGCTACACCTTC	EEEDDDDB8EDEEC@EEDDEEE9EDEA=DEEDEEBE@<CEED	TRBV12-3*00(170),TRBV12-4*00(170)	TRBD1*00(60)	TRBJ1-2*00(200)		430|439|467|0|9||45.0;430|439|467|0|9||45.0	11|23|36|14|26||60.0	28|40|68|30|42||60.0		NA	NA	NA	NA	NA	NA	NA	NA	NA	NA	TGTGCCAGCCATGTCGGGACAGGGGGACTCGGCTACACCTTC	23	NA	NA	NA	NA	NA	NA	NA	CASHVGTGGLGYTF	NA	:::::::::0:-8:9:14:1:-1:26:30:-8:42:::
BM26	19	1	0.0208333	TGTGCCAGCGGGTTACCTAATTCACCCCTCCACTTT	EEEEBEEEDEEEEEDEEEEBEEE=EDC<EED?EEEE	TRBV12-3*00(174),TRBV12-4*00(174)		TRBJ1-6*00(219)		430|439|467|0|9||45.0;430|439|467|0|9||45.0		26|45|73|17|36||95.0		NA	NA	NA	NA	NA	NA	NA	NA	NA	NA	TGTGCCAGCGGGTTACCTAATTCACCCCTCCACTTT	27	NA	NA	NA	NA	NA	NA	NA	CASGLPNSPLHF	NA	:::::::::0:-8:9:::::17:-6:36:::
BM26	20	1	0.0208333	TGTGCCAGCAGTTGGGCTAGGGGAGAAAATTCACCCCTCCACTTT	EEDEDECEBEE>EEDCDAEEEDEEEDEEEA>:DEBEDD=DBDDE>	TRBV12-3*00(175),TRBV12-4*00(175)	TRBD1*00(25),TRBD2*00(25)	TRBJ1-6*00(214)		430|443|467|0|13||65.0;430|443|467|0|13||65.0	17|22|36|18|23||25.0;7|12|48|15|20||25.0	27|45|73|27|45||90.0		NA	NA	NA	NA	NA	NA	NA	NA	NA	NA	TGTGCCAGCAGTTGGGCTAGGGGAGAAAATTCACCCCTCCACTTT	25	NA	NA	NA	NA	NA	NA	NA	CASSWARGENSPLHF	NA	:::::::::0:-4:13:18:-5:-2:23:27:-7:45:::
BM26	21	1	0.0208333	TGTGCCAGCAGTTTACGGGTGGGACTAGCGGGAGTAAATGAGCAGTTCTTC	EEDEEEEEEEEEEEC>EEEDEEEEEDEEEEEEEEEEEEEDEDEEEEEDEEE	TRBV12-3*00(135),TRBV12-4*00(135)	TRBD2*00(70)	TRBJ2-1*00(215)		430|445|467|0|15||75.0;430|445|467|0|15||75.0	16|30|48|20|34||70.0	27|42|70|36|51||75.0		NA	NA	NA	NA	NA	NA	NA	NA	NA	NA	TGTGCCAGCAGTTTACGGGTGGGACTAGCGGGAGTAAATGAGCAGTTCTTC	29	NA	NA	NA	NA	NA	NA	NA	CASSLRVGLAGVNEQFF	NA	:::::::::0:-2:15:20:0:-2:34:36:-7:51:::
BM26	22	1	0.0208333	TGTGCCAGCAGTTTAGGGTTAGGCACAGATACGCAGTATTTT	DEE8?DEDDCBCDDDEDDAAEDAC>AEEEC8DACB@DDDDBD	TRBV12-3*00(190),TRBV12-4*00(190)		TRBJ2-3*00(240)		430|446|467|0|16||80.0;430|446|467|0|16||80.0		21|41|69|22|42||100.0		NA	NA	NA	NA	NA	NA	NA	NA	NA	NA	TGTGCCAGCAGTTTAGGGTTAGGCACAGATACGCAGTATTTT	23	NA	NA	NA	NA	NA	NA	NA	CASSLGLGTDTQYF	NA	:::::::::0:-1:16:::::22:-1:42:::
BM26	24	1	0.0208333	TGTGCCAGCAGGGCCAGGCAGAACACAGATACGCAGTATTTT	EEEADD@EEEDBCDEDDEEEDCDECEBEBEBDCCCCEEDDAE	TRBV2*00(165)		TRBJ2-3*00(235)		430|441|467|0|11||55.0		22|41|69|23|42||95.0		NA	NA	NA	NA	NA	NA	NA	NA	NA	NA	TGTGCCAGCAGGGCCAGGCAGAACACAGATACGCAGTATTTT	31	NA	NA	NA	NA	NA	NA	NA	CASRARQNTDTQYF	NA	:::::::::0:-6:11:::::23:-2:42:::
BM26	25	1	0.0208333	TGTGCCAGCACGATGGATAGGTACGAGCAGTACTTC	EEDDDDDDE@DE@DEEC=CEEEBCE@CDEEECEABC	TRBV2*00(205)		TRBJ2-7*00(215)		430|440|467|0|10||50.0		24|39|67|21|36||75.0		NA	NA	NA	NA	NA	NA	NA	NA	NA	NA	TGTGCCAGCACGATGGATAGGTACGAGCAGTACTTC	28	NA	NA	NA	NA	NA	NA	NA	CASTMDRYEQYF	NA	:::::::::0:-7:10:::::21:-4:36:::
BM26	26	1	0.0208333	TGCAGTGCTAGAGGGACAGCTCAAGAGACCCAGTACTTC	DE>DAEBE>CAD<D;=AC=<:@C?8CCC@@AD;D@AC@A	TRBV20-1*00(230)	TRBD1*00(30)	TRBJ2-5*00(230)		421|434|455|0|13||65.0	13|19|36|13|19||30.0	22|40|68|21|39||90.0		NA	NA	NA	NA	NA	NA	NA	NA	NA	NA	TGCAGTGCTAGAGGGACAGCTCAAGAGACCCAGTACTTC	23	NA	NA	NA	NA	NA	NA	NA	CSARGTAQETQYF	NA	:::::::::0:-1:13:13:-1:-5:19:21:-2:39:::
BM26	27	1	0.0208333	TGTGCCAGCAGTTCAACAGGTTACTCTGGAAACACCATATATTTT	EDB=;DDEECD8EE>E@EEE@BE7>EEEEE;ED?<B@;ECACE;D	TRBV27*00(159)	TRBD1*00(25)	TRBJ1-3*00(250)		427|440|464|0|13||65.0	15|20|36|15|20||25.0	20|42|70|23|45||110.0		NA	NA	NA	NA	NA	NA	NA	NA	NA	NA	TGTGCCAGCAGTTCAACAGGTTACTCTGGAAACACCATATATTTT	22	NA	NA	NA	NA	NA	NA	NA	CASSSTGYSGNTIYF	NA	:::::::::0:-4:13:15:-3:-4:20:23:0:45:::
BM26	29	1	0.0208333	TGTGCCTGGAGTCGAGGCTTC	DDD>A:AB?>C9D??:CAD@B	TRBV30*00(290)		TRBJ1-2*00(160)		421|433|455|0|12||60.0		36|40|68|17|21||20.0		NA	NA	NA	NA	NA	NA	NA	NA	NA	NA	TGTGCCTGGAGTCGAGGCTTC	24	NA	NA	NA	NA	NA	NA	NA	CAWSRGF	NA	:::::::::0:-2:12:::::17:-16:21:::
BM26	30	1	0.0208333	TGCGCCAGCAGCTTTTCCCAGACAGGGAAAGGTTCACCCCTCCACTTT	CDCED@DE=?EEE@DECEDBB:BEEEE@CDDE=DE@CDEDEBADEEE@	TRBV5-1*00(165)	TRBD1*00(35)	TRBJ1-6*00(204)		427|441|463|0|14||70.0	14|21|36|20|27||35.0	29|45|73|32|48||80.0		NA	NA	NA	NA	NA	NA	NA	NA	NA	NA	TGCGCCAGCAGCTTTTCCCAGACAGGGAAAGGTTCACCCCTCCACTTT	25	NA	NA	NA	NA	NA	NA	NA	CASSFSQTGKGSPLHF	NA	:::::::::0:-2:14:20:-2:-3:27:32:-9:48:::
BM26	31	1	0.0208333	TGTGCCAGCAGTTACTTGAGGACTGGAAACACCATATATTTT	DEEDEECCEEEEE@EEEDEDDEEEEEEEDEDCEDEDEDEEEE	TRBV6-5*00(209),TRBV6-6*00(209),TRBV6-2*00(193),TRBV6-3*00(193),TRBV6-8*00(193)		TRBJ1-3*00(240)		427|447|464|0|20|SC443T|84.0;427|447|464|0|20|SC443T|84.0;427|447|464|0|20|SC443T|84.0;427|447|464|0|20|SC443T|84.0;424|444|461|0|20|SC440T|84.0		22|42|70|22|42||100.0		NA	NA	NA	NA	NA	NA	NA	NA	NA	NA	TGTGCCAGCAGTTACTTGAGGACTGGAAACACCATATATTTT	31	NA	NA	NA	NA	NA	NA	NA	CASSYLRTGNTIYF	NA	:::::::::0:3:20:::::22:-2:42:::
BM26	36	1	0.0208333	TGTGCCAGCAGCTTAGCTCTAAACGAGCAGTACTTC	EBB@EE:EDCBDBDD=ABC>B?<@DDB?ECC:?DE=	TRBV7-9*00(249),TRBV7-6*00(217)		TRBJ2-7*00(178)		430|452|467|0|22|SG447T|94.0;430|452|467|0|22|SG447T|94.0		25|39|67|22|36||70.0		NA	NA	NA	NA	NA	NA	NA	NA	NA	NA	TGTGCCAGCAGCTTAGCTCTAAACGAGCAGTACTTC	25	NA	NA	NA	NA	NA	NA	NA	CASSLALNEQYF	NA	:::::::::0:5:22:::::22:-5:36:::
BM27	1	205	0.184022	TGTGCCTGGGAGGGACCTAACAATGGCTACACCTTC	FFFFFFFFFFFFFFFFFEFEFFFFFFFEFFEFFFFF	TRBV30*00(346.7)	TRBD1*00(25),TRBD2*00(25)	TRBJ1-2*00(223.9)		421|430|455|0|9||45.0	12|17|36|11|16||25.0;16|21|48|11|16||25.0	20|40|68|16|36|ST25A|84.0		NA	NA	NA	NA	NA	NA	NA	NA	NA	NA	TGTGCCTGGGAGGGACCTAACAATGGCTACACCTTC	36	NA	NA	NA	NA	NA	NA	NA	CAWEGPNNGYTF	NA	:::::::::0:-5:9:11:0:-7:16:16:0:36:::
BM27	2	157	0.140934	TGTGCCAGCAGTTCTACAGGGACCGGGGAGCTGTTTTTT	FFFFFFFFFFFFFFFFFFFFFFFFFFFFFFFFFFFFFFF	TRBV6-5*00(225.7),TRBV6-8*00(225.7),TRBV6-1*00(220.7),TRBV6-6*00(208.6),TRBV6-3*00(198.5)	TRBD1*00(30)	TRBJ2-2*00(230)		427|440|464|0|13||65.0;424|437|461|0|13||65.0;427|439|464|0|12||60.0;427|440|464|0|13||65.0;427|440|464|0|13||65.0	15|21|36|15|21||30.0	25|43|71|21|39||90.0		NA	NA	NA	NA	NA	NA	NA	NA	NA	NA	TGTGCCAGCAGTTCTACAGGGACCGGGGAGCTGTTTTTT	37	NA	NA	NA	NA	NA	NA	NA	CASSSTGTGELFF	NA	:::::::::0:-4:13:15:-3:-3:21:21:-5:39:::
BM27	13	106	0.0951526	TGTGCCATCAGTGGCCCCGGGAGTTACGAGCAGTATTTC	FFFFFFFFFFFFFFFFFFFFFFFFFFFFFFFFFFEFEFF	TRBV10-3*00(300)	TRBD1*00(35),TRBD2*00(35)	TRBJ2-7*00(197.9)		427|440|464|0|13||65.0	9|16|36|15|22||35.0;13|20|48|15|22||35.0	24|39|67|24|39|SC35T|59.0		NA	NA	NA	NA	NA	NA	NA	NA	NA	NA	TGTGCCATCAGTGGCCCCGGGAGTTACGAGCAGTATTTC	36	NA	NA	NA	NA	NA	NA	NA	CAISGPGSYEQYF	NA	:::::::::0:-4:13:15:3:-8:22:24:-4:39:::
BM27	14	99	0.0888689	TGTGCCACCAGCAATCCCCAAGGGGGCGGCTCCTACGAGCAGTACTTC	EFFFFFFFFFFFFEEFFFFFFFFFFFFFFFFFFFFFFFFFFFEFFFFF	TRBV15*00(260.7)	TRBD1*00(40)	TRBJ2-7*00(239.7)		427|440|464|0|13||65.0	17|25|36|20|28||40.0	19|39|67|28|48||100.0		NA	NA	NA	NA	NA	NA	NA	NA	NA	NA	TGTGCCACCAGCAATCCCCAAGGGGGCGGCTCCTACGAGCAGTACTTC	36	NA	NA	NA	NA	NA	NA	NA	CATSNPQGGGSYEQYF	NA	:::::::::0:-4:13:20:-5:1:28:28:1:48:::
BM27	17	88	0.0789946	TGTGCCAGCAGTGAGACAGGTGGGAATTCACCCCTCCACTTT	FFFFFFFFFFFFFFFFFFFFFFFFFFFFFFFFFFFFFFFFFF	TRBV6-1*00(246.5),TRBV6-9*00(233.9),TRBV6-6*00(218.1)	TRBD1*00(30)	TRBJ1-6*00(213.8)		427|441|464|0|14||70.0;427|439|464|0|12||60.0;427|439|464|0|12||60.0	14|20|36|14|20||30.0	27|45|73|24|42||90.0		NA	NA	NA	NA	NA	NA	NA	NA	NA	NA	TGTGCCAGCAGTGAGACAGGTGGGAATTCACCCCTCCACTTT	37	NA	NA	NA	NA	NA	NA	NA	CASSETGGNSPLHF	NA	:::::::::0:-3:14:14:-2:-4:20:24:-7:42:::
BM27	18	87	0.0780969	TGTGCCACCTTGAGGGACATAGGACTAGCAGAGACCCAGTACTTC	FFFFFFFFFFFFFFFFFFFFFFFFFFFFFFFFFFFFFFFFFFFFF	TRBV15*00(241.4)	TRBD2*00(40)	TRBJ2-5*00(220)		427|436|464|0|9||45.0	17|25|48|21|29||40.0	24|40|68|29|45||80.0		NA	NA	NA	NA	NA	NA	NA	NA	NA	NA	TGTGCCACCTTGAGGGACATAGGACTAGCAGAGACCCAGTACTTC	37	NA	NA	NA	NA	NA	NA	NA	CATLRDIGLAETQYF	NA	:::::::::0:-8:9:21:-1:-7:29:29:-4:45:::
BM27	20	81	0.072711	TGTGCCAGCAGGGTATGGGGAAATCAGCCCCAGCATTTT	FFFFFFFFFFFFFEFFFFFFFFFFFFFFFFFFFFFFFFF	TRBV28*00(258.6)		TRBJ1-5*00(230)		427|438|464|0|11||55.0		24|42|70|21|39||90.0		NA	NA	NA	NA	NA	NA	NA	NA	NA	NA	TGTGCCAGCAGGGTATGGGGAAATCAGCCCCAGCATTTT	36	NA	NA	NA	NA	NA	NA	NA	CASRVWGNQPQHF	NA	:::::::::0:-6:11:::::21:-4:39:::
BM27	21	63	0.056553	TGCGCCAGCAGTGATTCGGGACAGGGAGGTGGCTACACCTTC	FFFFFFFFFFFEFFFFFFFFFFFFFFFFFFFFFEEFEFFFFF	TRBV10-1*00(280.4)	TRBD1*00(40)	TRBJ1-2*00(206.1)		427|445|464|0|18|SG441T|74.0	13|21|36|18|26||40.0	27|40|68|29|42||65.0		NA	NA	NA	NA	NA	NA	NA	NA	NA	NA	TGCGCCAGCAGTGATTCGGGACAGGGAGGTGGCTACACCTTC	36	NA	NA	NA	NA	NA	NA	NA	CASSDSGQGGGYTF	NA	:::::::::0:1:18:18:-1:-3:26:29:-7:42:::
BM27	22	63	0.056553	TGTGCCAGCAACCCTGAGGGGGTCGGTTACGAGCAGTACTTC	FFFFFFFFFFFFFFFFFFFFFFEFFFFFFFFFFFFFFFFFFF	TRBV28*00(254)	TRBD1*00(30)	TRBJ2-7*00(141)		427|437|464|0|10||50.0	17|23|36|16|22||30.0	24|39|67|27|42||75.0		NA	NA	NA	NA	NA	NA	NA	NA	NA	NA	TGTGCCAGCAACCCTGAGGGGGTCGGTTACGAGCAGTACTTC	36	NA	NA	NA	NA	NA	NA	NA	CASNPEGVGYEQYF	NA	:::::::::0:-7:10:16:-5:-1:22:27:-4:42:::
BM27	24	13	0.0116697	TGTGCCAGCAGTCCGTCAGCGTCCTTGAATGAAAAACTGTTTTTT	EDEEEEEDEEEEFEEEEEEEEEEEEFEEEEEEFEEFFEEEEEEEE	TRBV6-1*00(183.6),TRBV6-5*00(183.6),TRBV6-6*00(180.9)		TRBJ1-4*00(202.8)		427|439|464|0|12||60.0;427|439|464|0|12||60.0;427|439|464|0|12||60.0		25|43|71|27|45||90.0		NA	NA	NA	NA	NA	NA	NA	NA	NA	NA	TGTGCCAGCAGTCCGTCAGCGTCCTTGAATGAAAAACTGTTTTTT	35	NA	NA	NA	NA	NA	NA	NA	CASSPSASLNEKLFF	NA	:::::::::0:-5:12:::::27:-5:45:::
BM27	25	11	0.00987433	TGTGCCAGCAGTGAGTATGAAGCGGGTGAGCAGTTCTTC	EECEEEECDEEEEDEDDDEDEDDDECECEEDEEEDEDEE	TRBV6-4*00(185.1)	TRBD2*00(30)	TRBJ2-1*00(195.8)		427|441|464|0|14||70.0	22|28|48|20|26||30.0	29|42|70|26|39||65.0		NA	NA	NA	NA	NA	NA	NA	NA	NA	NA	TGTGCCAGCAGTGAGTATGAAGCGGGTGAGCAGTTCTTC	34	NA	NA	NA	NA	NA	NA	NA	CASSEYEAGEQFF	NA	:::::::::0:-3:14:20:-6:-4:26:26:-9:39:::
BM27	26	9	0.008079	TGCGCCAGCAGTGCCTGGACAGGGTCTGGAAACACCATATATTTT	EEEDDEEEEEDEEEDEDEDEEEEEDEEEEEBDEBEDEEEEEEEEE	TRBV10-1*00(168.4)	TRBD1*00(40)	TRBJ1-3*00(245)		427|440|464|0|13||65.0	13|21|36|16|24||40.0	21|42|70|24|45||105.0		NA	NA	NA	NA	NA	NA	NA	NA	NA	NA	TGCGCCAGCAGTGCCTGGACAGGGTCTGGAAACACCATATATTTT	33	NA	NA	NA	NA	NA	NA	NA	CASSAWTGSGNTIYF	NA	:::::::::0:-4:13:16:-1:-3:24:24:-1:45:::
BM27	27	9	0.008079	TGTGCCAGCAGTTTATGGTCAGCAACTAATGAAAAACTGTTTTTT	EEDEEEEEEEEEDEEEDECEEDEECCEEDEDEEEDBEEDEEDEDE	TRBV28*00(194)		TRBJ1-4*00(250)		427|444|464|0|17||85.0		19|43|71|21|45||120.0		NA	NA	NA	NA	NA	NA	NA	NA	NA	NA	TGTGCCAGCAGTTTATGGTCAGCAACTAATGAAAAACTGTTTTTT	33	NA	NA	NA	NA	NA	NA	NA	CASSLWSATNEKLFF	NA	:::::::::0:0:17:::::21:1:45:::
BM27	28	8	0.00718133	TGTGCCAGCAGAGGGCGGGGTGAGGGGGACCAGCCCCAGCATTTT	EEEEEEEEEEFEEEEEEEEEEEEEEEEEEEEEEEDEEEEEEEEEE	TRBV12-3*00(157),TRBV12-4*00(157)	TRBD1*00(30)	TRBJ1-5*00(215)		430|441|467|0|11||55.0;430|441|467|0|11||55.0	17|23|36|22|28||30.0	27|42|70|30|45||75.0		NA	NA	NA	NA	NA	NA	NA	NA	NA	NA	TGTGCCAGCAGAGGGCGGGGTGAGGGGGACCAGCCCCAGCATTTT	35	NA	NA	NA	NA	NA	NA	NA	CASRGRGEGDQPQHF	NA	:::::::::0:-6:11:22:-5:-1:28:30:-7:45:::
BM27	29	6	0.005386	TGCAGCGGCCGGGGGGTACAAGAGACCCAGTACTTC	EEE<DDEDECEEEEEEDCEEEEEDEDEEEEEEEEEE	TRBV29-1*00(193.7)	TRBD1*00(25),TRBD2*00(25)	TRBJ2-5*00(230)		421|428|455|0|7||35.0	10|15|36|8|13||25.0;14|19|48|8|13||25.0	22|40|68|18|36||90.0		NA	NA	NA	NA	NA	NA	NA	NA	NA	NA	TGCAGCGGCCGGGGGGTACAAGAGACCCAGTACTTC	27	NA	NA	NA	NA	NA	NA	NA	CSGRGVQETQYF	NA	:::::::::0:-7:7:8:2:-9:13:18:-2:36:::
BM27	30	5	0.00448833	TGTGCCAGCAGTCTCGGCGGGACAGGGATATATGGCTACACCTTC	EECDECEDEEE;EECEDDEDE;EEEEEEEEDDBDCEEAEBEEEED	TRBV12-3*00(163.6),TRBV12-4*00(163.6)	TRBD1*00(50)	TRBJ1-2*00(211.8)		430|442|467|0|12||60.0;430|442|467|0|12||60.0	11|21|36|17|27||50.0	25|40|68|30|45||75.0		NA	NA	NA	NA	NA	NA	NA	NA	NA	NA	TGTGCCAGCAGTCTCGGCGGGACAGGGATATATGGCTACACCTTC	26	NA	NA	NA	NA	NA	NA	NA	CASSLGGTGIYGYTF	NA	:::::::::0:-5:12:17:1:-3:27:30:-5:45:::
BM27	31	5	0.00448833	TGTGTTAGTGGCTCCCTAAGCGGGGGTGAAGCTTTCTTT	EEEEEEDEEEDEBDEEEECEEEEEEEEEEEDEDEEEEEE	TRBV12-5*00(156.6)	TRBD2*00(30)	TRBJ1-1*00(189)		430|441|467|0|11|SC434T|39.0	22|28|48|18|24||30.0	27|40|68|26|39||65.0		NA	NA	NA	NA	NA	NA	NA	NA	NA	NA	TGTGTTAGTGGCTCCCTAAGCGGGGGTGAAGCTTTCTTT	33	NA	NA	NA	NA	NA	NA	NA	CVSGSLSGGEAFF	NA	:::::::::0:-6:11:18:-6:-4:24:26:-7:39:::
BM27	32	5	0.00448833	TGTGCCAGCAGCTCAGGGCCCTCAGGGGGCTACACCTTC	EECDDEDDEECEBECA@DECD=DEACE@DDABD@DEACD	TRBV7-2*00(196),TRBV7-8*00(180)	TRBD2*00(45)	TRBJ1-2*00(200)		430|443|467|0|13||65.0;430|443|467|0|13||65.0	28|37|48|14|23||45.0	28|40|68|27|39||60.0		NA	NA	NA	NA	NA	NA	NA	NA	NA	NA	TGTGCCAGCAGCTCAGGGCCCTCAGGGGGCTACACCTTC	28	NA	NA	NA	NA	NA	NA	NA	CASSSGPSGGYTF	NA	:::::::::0:-4:13:14:-12:5:23:27:-8:39:::
BM27	33	4	0.00359066	TGCGCCAGCACGGGACATCTAAATGAAAAACTGTTTTTT	EEEEEDEDEEEBED:EDEEEDECDEE=D@EBECBDEEED	TRBV10-2*00(204)	TRBD1*00(35),TRBD2*00(30)	TRBJ1-4*00(193)		427|437|464|0|10||50.0	11|18|36|10|17||35.0;15|21|48|10|16||30.0	25|43|71|21|39||90.0		NA	NA	NA	NA	NA	NA	NA	NA	NA	NA	TGCGCCAGCACGGGACATCTAAATGAAAAACTGTTTTTT	25	NA	NA	NA	NA	NA	NA	NA	CASTGHLNEKLFF	NA	:::::::::0:-7:10:10:1:-6:17:21:-5:39:::
BM27	34	4	0.00359066	TGTGCCACCAGCAAGGACAGGGATCTTGGCTACACCTTC	?CE;CE@BEEDCCDEEAEEDEEDED@DEECDBE?@CC=@	TRBV15*00(166.5)	TRBD1*00(40)	TRBJ1-2*00(165)		427|440|464|0|13||65.0	13|21|36|14|22||40.0	27|40|68|26|39||65.0		NA	NA	NA	NA	NA	NA	NA	NA	NA	NA	TGTGCCACCAGCAAGGACAGGGATCTTGGCTACACCTTC	26	NA	NA	NA	NA	NA	NA	NA	CATSKDRDLGYTF	NA	:::::::::0:-4:13:14:-1:-3:22:26:-7:39:::
BM27	35	4	0.00359066	TGTGCCAGCACCTTCCCCCGGACAGGGATCAATGAGCAGTTCTTC	DEBCDECAEAEE>EDECCEDBDEDEED?;DEAC<DDDBEDAEE?C	TRBV2*00(125)	TRBD1*00(44)	TRBJ2-1*00(220)		430|440|467|0|10||50.0	9|21|36|15|27|SG12C|44.0	26|42|70|29|45||80.0		NA	NA	NA	NA	NA	NA	NA	NA	NA	NA	TGTGCCAGCACCTTCCCCCGGACAGGGATCAATGAGCAGTTCTTC	26	NA	NA	NA	NA	NA	NA	NA	CASTFPRTGINEQFF	NA	:::::::::0:-7:10:15:3:-3:27:29:-6:45:::
BM27	36	3	0.002693	TGTGCCAGCAGTTTAGGGACAGGCTATGGCTACACCTTC	EEEE>EE@EEDEEEE@EEEBEEEDEDECCCEBCEDEEEE	TRBV12-3*00(220),TRBV12-4*00(220)	TRBD1*00(35)	TRBJ1-2*00(220)		430|446|467|0|16||80.0;430|446|467|0|16||80.0	13|20|36|16|23||35.0	24|40|68|23|39||80.0		NA	NA	NA	NA	NA	NA	NA	NA	NA	NA	TGTGCCAGCAGTTTAGGGACAGGCTATGGCTACACCTTC	29	NA	NA	NA	NA	NA	NA	NA	CASSLGTGYGYTF	NA	:::::::::0:-1:16:16:-1:-4:23:23:-4:39:::
BM27	38	3	0.002693	TGTGCCAGCAGTTTCAGGCCGCGGGACAATGAGCAGTTCTTC	CCCC@EDEEDED<=DBEEA@ECEEECEDCECDEEEEECDBED	TRBV28*00(185)	TRBD2*00(25)	TRBJ2-1*00(185)		427|441|464|0|14||70.0	23|28|48|20|25||25.0	25|42|70|25|42||85.0		NA	NA	NA	NA	NA	NA	NA	NA	NA	NA	TGTGCCAGCAGTTTCAGGCCGCGGGACAATGAGCAGTTCTTC	27	NA	NA	NA	NA	NA	NA	NA	CASSFRPRDNEQFF	NA	:::::::::0:-3:14:20:-7:-4:25:25:-5:42:::
BM27	39	2	0.00179533	TGTGCCAGCATCAGGGGAATTGAAGCTTTCTTT	EDEECEEEDACEEDEEEEEEEEEECEEEBDEED	TRBV12-3*00(164),TRBV12-4*00(164)	TRBD1*00(30)	TRBJ1-1*00(165)		430|440|467|0|10||50.0;430|440|467|0|10||50.0	16|22|36|11|17||30.0	27|40|68|20|33||65.0		NA	NA	NA	NA	NA	NA	NA	NA	NA	NA	TGTGCCAGCATCAGGGGAATTGAAGCTTTCTTT	32	NA	NA	NA	NA	NA	NA	NA	CASIRGIEAFF	NA	:::::::::0:-7:10:11:-4:-2:17:20:-7:33:::
BM27	40	2	0.00179533	TGTGCCAGCAGTATGTGGGAGGGCCACAATGAGCAGTTCTTC	EEEDEEDEEEEEEEEEEEEEEDCEEDEEEEEEDEEDEEEDEE	TRBV12-3*00(157),TRBV12-4*00(157)	TRBD2*00(45)	TRBJ2-1*00(225)		430|442|467|0|12||60.0;430|442|467|0|12||60.0	25|34|48|16|25||45.0	25|42|70|25|42||85.0		NA	NA	NA	NA	NA	NA	NA	NA	NA	NA	TGTGCCAGCAGTATGTGGGAGGGCCACAATGAGCAGTTCTTC	34	NA	NA	NA	NA	NA	NA	NA	CASSMWEGHNEQFF	NA	:::::::::0:-5:12:16:-9:2:25:25:-5:42:::
BM27	41	2	0.00179533	TGTGCCAGCAGTTTTTCGACAGGGGTTTACGAGCAGTACTTC	DDEEED>DEBC@CCCBDE?EDEEDE@DECDDEEEEEEDEEEE	TRBV12-3*00(174.5),TRBV12-4*00(174.5)	TRBD1*00(40)	TRBJ2-7*00(167)		430|444|467|0|14||70.0;430|444|467|0|14||70.0	14|22|36|17|25||40.0	24|39|67|27|42||75.0		NA	NA	NA	NA	NA	NA	NA	NA	NA	NA	TGTGCCAGCAGTTTTTCGACAGGGGTTTACGAGCAGTACTTC	29	NA	NA	NA	NA	NA	NA	NA	CASSFSTGVYEQYF	NA	:::::::::0:-3:14:17:-2:-2:25:27:-4:42:::
BM27	42	2	0.00179533	TGTGCCAGCAGGAGCGGGAGTGCAGATACGCAGTATTTT	DEDEBDCCAEDEEECEEEDCECEEDDCCADEEDEEEDEE	TRBV2*00(164)	TRBD2*00(40)	TRBJ2-3*00(209)		430|441|467|0|11||55.0	22|30|48|12|20||40.0	24|41|69|22|39||85.0		NA	NA	NA	NA	NA	NA	NA	NA	NA	NA	TGTGCCAGCAGGAGCGGGAGTGCAGATACGCAGTATTTT	32	NA	NA	NA	NA	NA	NA	NA	CASRSGSADTQYF	NA	:::::::::0:-6:11:12:-6:-2:20:22:-4:39:::
BM27	43	2	0.00179533	TGTGCCAGCAGGAGGGGCAGCGGGAACGGCGAGCAGTACTTC	D=C=DCCDC=C=9DCAAE@CEBC9C7C@ADB>CEDED99ABD	TRBV2*00(180)	TRBD2*00(35)	TRBJ2-7*00(205)		430|441|467|0|11||55.0	22|29|48|18|25||35.0	26|39|67|29|42||65.0		NA	NA	NA	NA	NA	NA	NA	NA	NA	NA	TGTGCCAGCAGGAGGGGCAGCGGGAACGGCGAGCAGTACTTC	22	NA	NA	NA	NA	NA	NA	NA	CASRRGSGNGEQYF	NA	:::::::::0:-6:11:18:-6:-3:25:29:-6:42:::
BM27	44	2	0.00179533	TGTGCCAGCAGTGAAAGGGCCGGGGGGGGGGAGACCCAGTACTTC	EEEEEEECEEEEFEEEEEEEEEEEEDEEEEEEEEEEEEFDEEEEE	TRBV25-1*00(210)	TRBD2*00(30)	TRBJ2-5*00(207)		427|442|464|0|15||75.0	28|34|48|15|21||30.0	25|40|68|30|45||75.0		NA	NA	NA	NA	NA	NA	NA	NA	NA	NA	TGTGCCAGCAGTGAAAGGGCCGGGGGGGGGGAGACCCAGTACTTC	34	NA	NA	NA	NA	NA	NA	NA	CASSERAGGGETQYF	NA	:::::::::0:-2:15:15:-12:2:21:30:-5:45:::
BM27	45	2	0.00179533	TGTGCCAGCAGTTTATATTGGGATCAGCCCCAGCATTTT	EEEDEEEDEEDEEEEEEEEDECDDEEBCCDEDEEDEEEE	TRBV27*00(212)		TRBJ1-5*00(225)		427|443|464|0|16||80.0		25|42|70|22|39||85.0		NA	NA	NA	NA	NA	NA	NA	NA	NA	NA	TGTGCCAGCAGTTTATATTGGGATCAGCCCCAGCATTTT	33	NA	NA	NA	NA	NA	NA	NA	CASSLYWDQPQHF	NA	:::::::::0:-1:16:::::22:-5:39:::
BM27	46	2	0.00179533	TGTGCCAGCAGCCCCAGGGGTATCACTGAAGCTTTCTTT	EDEDEECDEEE=D@CEBEEEDEDEDEEEEDDEDED?EEE	TRBV28*00(187)	TRBD1*00(30)	TRBJ1-1*00(220)		427|438|464|0|11||55.0	16|22|36|14|20||30.0	24|40|68|23|39||80.0		NA	NA	NA	NA	NA	NA	NA	NA	NA	NA	TGTGCCAGCAGCCCCAGGGGTATCACTGAAGCTTTCTTT	28	NA	NA	NA	NA	NA	NA	NA	CASSPRGITEAFF	NA	:::::::::0:-6:11:14:-4:-2:20:23:-4:39:::
BM27	47	2	0.00179533	TGTGCCAGCAGTTTGGACAGAAACTATGGCTACACCTTC	DBBCDDECEDDDBDBEEDDEE@EDDCD9>?A6CE>AEDC	TRBV28*00(178)	TRBD1*00(30)	TRBJ1-2*00(230)		427|441|464|0|14||70.0	13|19|36|14|20||30.0	22|40|68|21|39||90.0		NA	NA	NA	NA	NA	NA	NA	NA	NA	NA	TGTGCCAGCAGTTTGGACAGAAACTATGGCTACACCTTC	21	NA	NA	NA	NA	NA	NA	NA	CASSLDRNYGYTF	NA	:::::::::0:-3:14:14:-1:-5:20:21:-2:39:::
BM27	48	2	0.00179533	TGTGCCAGCAGTGAAGCTCCGGACTCTCAAGAGACCCAGTACTTC	ECECC@EEDCEECEE;DDEECEAE>EDEDCDEEEDDEEEECECDE	TRBV6-1*00(194)	TRBD2*00(25)	TRBJ2-5*00(230)		427|444|464|0|17||85.0	17|22|48|20|25||25.0	22|40|68|27|45||90.0		NA	NA	NA	NA	NA	NA	NA	NA	NA	NA	TGTGCCAGCAGTGAAGCTCCGGACTCTCAAGAGACCCAGTACTTC	26	NA	NA	NA	NA	NA	NA	NA	CASSEAPDSQETQYF	NA	:::::::::0:0:17:20:-1:-10:25:27:-2:45:::
BM27	49	2	0.00179533	TGTGCCAGCAGACAGGCCGAAAACACTGAAGCTTTCTTT	ED=EEEBEEC?>EAEEECECCDEEEEDEEDEEDECEEEE	TRBV6-2*00(205.5),TRBV6-3*00(205.5)	TRBD1*00(25)	TRBJ1-1*00(230)		427|438|464|0|11||55.0;427|438|464|0|11||55.0	15|20|36|11|16||25.0	22|40|68|21|39||90.0		NA	NA	NA	NA	NA	NA	NA	NA	NA	NA	TGTGCCAGCAGACAGGCCGAAAACACTGAAGCTTTCTTT	28	NA	NA	NA	NA	NA	NA	NA	CASRQAENTEAFF	NA	:::::::::0:-6:11:11:-3:-4:16:21:-2:39:::
BM27	50	2	0.00179533	TGTGCCAGCAGGTTGGGACAGGGTGCTATCTTTGACACTGAAGCTTTCTTT	EEEEDECEE@DEDCDEECEDBBDEDDBDEEEEEDCECDEEEEDEDDEECDE	TRBV6-1*00(135),TRBV6-4*00(135),TRBV6-5*00(135),TRBV6-6*00(135),TRBV10-3*00(119)	TRBD1*00(45)	TRBJ1-1*00(217)		427|438|464|0|11||55.0;427|438|464|0|11||55.0;427|438|464|0|11||55.0;427|438|464|0|11||55.0;427|438|464|0|11|ST434G|39.0	12|21|36|14|23||45.0	23|40|68|34|51||85.0		NA	NA	NA	NA	NA	NA	NA	NA	NA	NA	TGTGCCAGCAGGTTGGGACAGGGTGCTATCTTTGACACTGAAGCTTTCTTT	31	NA	NA	NA	NA	NA	NA	NA	CASRLGQGAIFDTEAFF	NA	:::::::::0:-6:11:14:0:-3:23:34:-3:51:::
BM27	51	2	0.00179533	TGTGCCAGCAGGGCAACCGGGACAGTTAGTACCTTC	DCDDEBEEEEBC9EBACBEECAEEECDEAB@EDC;E	TRBV6-1*00(202),TRBV6-5*00(202),TRBV6-6*00(202)	TRBD1*00(45)	TRBJ1-2*00(170)		427|438|464|0|11||55.0;427|438|464|0|11||55.0;427|438|464|0|11||55.0	10|19|36|16|25||45.0	34|40|68|30|36||30.0		NA	NA	NA	NA	NA	NA	NA	NA	NA	NA	TGTGCCAGCAGGGCAACCGGGACAGTTAGTACCTTC	24	NA	NA	NA	NA	NA	NA	NA	CASRATGTVSTF	NA	:::::::::0:-6:11:16:2:-5:25:30:-14:36:::
BM27	52	1	0.000898	TGCGCCAGCAGTCCCGACTGGTATGGCTACACCTTC	EEEEEEEEEFEEEEEFEEEEEEFEEEEEEEEEFEEE	TRBV10-2*00(236),TRBV10-1*00(220)		TRBJ1-2*00(215)		427|439|464|0|12||60.0;427|439|464|0|12||60.0		25|40|68|21|36||75.0		NA	NA	NA	NA	NA	NA	NA	NA	NA	NA	TGCGCCAGCAGTCCCGACTGGTATGGCTACACCTTC	36	NA	NA	NA	NA	NA	NA	NA	CASSPDWYGYTF	NA	:::::::::0:-5:12:::::21:-5:36:::
BM27	54	1	0.000898	TGTGCCAGCAGTTTTGCGAACACTGAAGCTTTCTTT	EEBEEEEEEEDEEDEEEEDDDEEEDEEEEEEEEEEF	TRBV12-3*00(267),TRBV12-4*00(267)		TRBJ1-1*00(235)		430|448|467|0|18|SA444T|74.0;430|448|467|0|18|SA444T|74.0		21|40|68|17|36||95.0		NA	NA	NA	NA	NA	NA	NA	NA	NA	NA	TGTGCCAGCAGTTTTGCGAACACTGAAGCTTTCTTT	33	NA	NA	NA	NA	NA	NA	NA	CASSFANTEAFF	NA	:::::::::0:1:18:::::17:-1:36:::
BM27	55	1	0.000898	TGTGCCAGCAGTTCCTCGGGGGGGAGGTCTGAAGCTTTCTTT	C@@?@DACDB=@ABC8;EECCDCEDCDA>EDDE8D<E@DDEE	TRBV12-3*00(190),TRBV12-4*00(190)	TRBD2*00(30)	TRBJ1-1*00(210)		430|443|467|0|13||65.0;430|443|467|0|13||65.0	25|31|48|21|27||30.0	26|40|68|28|42||70.0		NA	NA	NA	NA	NA	NA	NA	NA	NA	NA	TGTGCCAGCAGTTCCTCGGGGGGGAGGTCTGAAGCTTTCTTT	23	NA	NA	NA	NA	NA	NA	NA	CASSSSGGRSEAFF	NA	:::::::::0:-4:13:21:-9:-1:27:28:-6:42:::
BM27	56	1	0.000898	TGTGCCAGCAGTCATGACAGGGACGAGGAAAAACTGTTTTTT	9EDEDEEBEED:EBD?AE<E>CBEDE@DEEDDBDEBEECDCC	TRBV12-3*00(220),TRBV12-4*00(220)	TRBD1*00(35)	TRBJ1-4*00(205)		430|442|467|0|12||60.0;430|442|467|0|12||60.0	14|21|36|15|22||35.0	28|43|71|27|42||75.0		NA	NA	NA	NA	NA	NA	NA	NA	NA	NA	TGTGCCAGCAGTCATGACAGGGACGAGGAAAAACTGTTTTTT	24	NA	NA	NA	NA	NA	NA	NA	CASSHDRDEEKLFF	NA	:::::::::0:-5:12:15:-2:-3:22:27:-8:42:::
BM27	57	1	0.000898	TGTGCCAGCAGTTTAGTTAATGAGCAGTTCTTC	EEED?EEDDDEEDE?DCEDCEDEC=EDD=DECB	TRBV12-3*00(230),TRBV12-4*00(230)		TRBJ2-1*00(215)		430|446|467|0|16||80.0;430|446|467|0|16||80.0		27|42|70|18|33||75.0		NA	NA	NA	NA	NA	NA	NA	NA	NA	NA	TGTGCCAGCAGTTTAGTTAATGAGCAGTTCTTC	28	NA	NA	NA	NA	NA	NA	NA	CASSLVNEQFF	NA	:::::::::0:-1:16:::::18:-7:33:::
BM27	60	1	0.000898	TGTGCCAGCAGCCAACGGCACCAAGAGACCCAGTACTTC	;<CDDEBEE?@EEE:EDEE6DEC8=DD9E@BD?BAEC<B	TRBV14*00(240)		TRBJ2-5*00(240)		430|445|467|0|15||75.0		20|40|68|19|39||100.0		NA	NA	NA	NA	NA	NA	NA	NA	NA	NA	TGTGCCAGCAGCCAACGGCACCAAGAGACCCAGTACTTC	21	NA	NA	NA	NA	NA	NA	NA	CASSQRHQETQYF	NA	:::::::::0:-2:15:::::19:0:39:::
BM27	62	1	0.000898	TGTGCCAGTAGTATCGAGGCGGTCAGGGGCAATCAGCCCCAGCATTTT	BEEE?CE>EEEEDEBEDDEEEE<EDEEE6EDEDEEEEBDDDEDDEDDE	TRBV19*00(334)	TRBD1*00(25)	TRBJ1-5*00(240)		427|441|464|0|14||70.0	16|21|36|23|28||25.0	22|42|70|28|48||100.0		NA	NA	NA	NA	NA	NA	NA	NA	NA	NA	TGTGCCAGTAGTATCGAGGCGGTCAGGGGCAATCAGCCCCAGCATTTT	21	NA	NA	NA	NA	NA	NA	NA	CASSIEAVRGNQPQHF	NA	:::::::::0:-3:14:23:-4:-3:28:28:-2:48:::
BM27	63	1	0.000898	TGTGCCAGTAGCCATCAGAGGAAACTAAACAATGAGCAGTTCTTC	EEEA;DEDECB=?EDEDDECDEEECDDDCDEAEECECEEEDACD?	TRBV19*00(200)		TRBJ2-1*00(167)		427|438|464|0|11||55.0		25|42|70|28|45||85.0		NA	NA	NA	NA	NA	NA	NA	NA	NA	NA	TGTGCCAGTAGCCATCAGAGGAAACTAAACAATGAGCAGTTCTTC	26	NA	NA	NA	NA	NA	NA	NA	CASSHQRKLNNEQFF	NA	:::::::::0:-6:11:::::28:-5:45:::
BM27	64	1	0.000898	TGTGCCAGTAGTATCGGGTCGGCCGGGGAGCTGTTTTTT	EEE;CBECEDCDBCCEC:D:CDCCC:CBD>CDEEEEADE	TRBV19*00(210)		TRBJ2-2*00(225)		427|441|464|0|14||70.0		26|43|71|22|39||85.0		NA	NA	NA	NA	NA	NA	NA	NA	NA	NA	TGTGCCAGTAGTATCGGGTCGGCCGGGGAGCTGTTTTTT	25	NA	NA	NA	NA	NA	NA	NA	CASSIGSAGELFF	NA	:::::::::0:-3:14:::::22:-6:39:::
BM27	65	1	0.000898	TGTGCCAGTAGTATATCCGACGGCTCCACCGGGGAGCTGTTTTTT	DDDC=EEEEEEE@@@BEEA>BEEE8DDCDDEEEE<E;EEEEEEED	TRBV19*00(185)		TRBJ2-2*00(219)		427|442|464|0|15||75.0		24|43|71|26|45||95.0		NA	NA	NA	NA	NA	NA	NA	NA	NA	NA	TGTGCCAGTAGTATATCCGACGGCTCCACCGGGGAGCTGTTTTTT	23	NA	NA	NA	NA	NA	NA	NA	CASSISDGSTGELFF	NA	:::::::::0:-2:15:::::26:-4:45:::
BM27	66	1	0.000898	TGTGCCAGCCAAGGGGGAGGGACTGGGGCCAACGTCCTGACTTTC	ED;EEEEEDEEED>EBDEEEEE:EEEEEE9EEEE7?EE???????	TRBV19*00(304)	TRBD2*00(35),TRBD1*00(30)	TRBJ2-6*00(80)		427|435|464|0|8||40.0	25|32|48|14|21||35.0;17|23|36|11|17||30.0	22|45|73|22|45||115.0		NA	NA	NA	NA	NA	NA	NA	NA	NA	NA	TGTGCCAGCCAAGGGGGAGGGACTGGGGCCAACGTCCTGACTTTC	22	NA	NA	NA	NA	NA	NA	NA	CASQGGGTGANVLTF	NA	:::::::::0:-9:8:14:-9:0:21:22:-2:45:::
BM27	67	1	0.000898	TGTGCCAGCAAGGAGGGAGCGAACACCGGGGAGCTGTTTTTT	EECBC>EEEB:ED7EEECCCD:AED?EEDEEEEEEEE=EEEE	TRBV2*00(175)	TRBD2*00(30)	TRBJ2-2*00(244)		430|440|467|0|10||50.0	26|32|48|11|17||30.0	19|43|71|18|42||120.0		NA	NA	NA	NA	NA	NA	NA	NA	NA	NA	TGTGCCAGCAAGGAGGGAGCGAACACCGGGGAGCTGTTTTTT	22	NA	NA	NA	NA	NA	NA	NA	CASKEGANTGELFF	NA	:::::::::0:-7:10:11:-10:0:17:18:1:42:::
BM27	70	1	0.000898	TGTGCCAGCAGAGGCCGGACAGATACGCAGTATTTT	=DAE@D=D@B@@C><BDD;?EEBE;C<B@AE=<CDC	TRBV2*00(195)		TRBJ2-3*00(230)		430|441|467|0|11||55.0		23|41|69|18|36||90.0		NA	NA	NA	NA	NA	NA	NA	NA	NA	NA	TGTGCCAGCAGAGGCCGGACAGATACGCAGTATTTT	26	NA	NA	NA	NA	NA	NA	NA	CASRGRTDTQYF	NA	:::::::::0:-6:11:::::18:-3:36:::
BM27	71	1	0.000898	TGTGCCAGCAGTGAATCTAGCACAGATACGCAGTATTTT	DD;>BECDDACBBE?D@BD>BBECB=DADAEDCDD@B:C	TRBV2*00(200)		TRBJ2-3*00(255)		430|445|467|0|15||75.0		18|41|69|16|39||115.0		NA	NA	NA	NA	NA	NA	NA	NA	NA	NA	TGTGCCAGCAGTGAATCTAGCACAGATACGCAGTATTTT	25	NA	NA	NA	NA	NA	NA	NA	CASSESSTDTQYF	NA	:::::::::0:-2:15:::::16:2:39:::
BM27	73	1	0.000898	TGCAGTGCTAGGGACAGGGGTTACGAGCAGTACTTC	EEC:?BED>9EBAAD@EDEE;EBAEDCEEEEBBED9	TRBV20-1*00(194)	TRBD1*00(45)	TRBJ2-7*00(215)		421|432|455|0|11||55.0	13|22|36|11|20||45.0	24|39|67|21|36||75.0		NA	NA	NA	NA	NA	NA	NA	NA	NA	NA	TGCAGTGCTAGGGACAGGGGTTACGAGCAGTACTTC	24	NA	NA	NA	NA	NA	NA	NA	CSARDRGYEQYF	NA	:::::::::0:-3:11:11:-1:-2:20:21:-4:36:::
BM27	74	1	0.000898	TGTGCCACCAGTCAGGCGGGGCGGGAGCTGTTTTTT	EBDAEDDCEEECEEDEEADDDED9EBEEDE=DEEEE	TRBV24-1*00(283)	TRBD1*00(25),TRBD2*00(25)	TRBJ2-2*00(194)		427|439|465|0|12||60.0	19|24|36|17|22||25.0;23|28|48|15|20||25.0	29|43|71|22|36||70.0		NA	NA	NA	NA	NA	NA	NA	NA	NA	NA	TGTGCCACCAGTCAGGCGGGGCGGGAGCTGTTTTTT	24	NA	NA	NA	NA	NA	NA	NA	CATSQAGRELFF	NA	:::::::::0:-6:12:17:-7:0:22:22:-9:36:::
BM27	75	1	0.000898	TGTGCCAGCAGTGAACGTCAGGTGATCAATCAGCCCCAGCATTTT	FEEEEEEEEEEEDEEEFEEEEEEEEEEEEEECEAFEEECFDEEEE	TRBV25-1*00(185)		TRBJ1-5*00(219)		427|442|464|0|15||75.0		23|42|70|26|45||95.0		NA	NA	NA	NA	NA	NA	NA	NA	NA	NA	TGTGCCAGCAGTGAACGTCAGGTGATCAATCAGCCCCAGCATTTT	32	NA	NA	NA	NA	NA	NA	NA	CASSERQVINQPQHF	NA	:::::::::0:-2:15:::::26:-3:45:::
BM27	78	1	0.000898	TGTGCCAGCAGTTTAGGGGGCACCGGGGAGCTGTTTTTT	CCEDEDDEEDEDEEEEDAE>EDEDCEEEDEDEEEEEECE	TRBV27*00(215)	TRBD1*00(25)	TRBJ2-2*00(235)		427|442|464|0|15||75.0	18|23|36|15|20||25.0	24|43|71|20|39||95.0		NA	NA	NA	NA	NA	NA	NA	NA	NA	NA	TGTGCCAGCAGTTTAGGGGGCACCGGGGAGCTGTTTTTT	29	NA	NA	NA	NA	NA	NA	NA	CASSLGGTGELFF	NA	:::::::::0:-2:15:15:-6:-1:20:20:-4:39:::
BM27	80	1	0.000898	TGTGCCAGCACCCAGGGGTTTGGGTCTTACGAGCAGTACTTC	EEDEEECEEEEEEECEEEECFEEEDDFEBFEEEEEEEEEEEE	TRBV27*00(243)	TRBD1*00(30)	TRBJ2-7*00(95)		427|437|464|0|10||50.0	16|22|36|12|18||30.0	24|39|67|27|42||75.0		NA	NA	NA	NA	NA	NA	NA	NA	NA	NA	TGTGCCAGCACCCAGGGGTTTGGGTCTTACGAGCAGTACTTC	33	NA	NA	NA	NA	NA	NA	NA	CASTQGFGSYEQYF	NA	:::::::::0:-7:10:12:-4:-2:18:27:-4:42:::
BM27	82	1	0.000898	TGTGCCAGCAGTCAGGGGGCGCTGAACACTGAAGCTTTCTTT	B8B>ADDA@E7=?DCAA6@AC;@@C=B?A9>C==B>C<?6;=	TRBV28*00(185)	TRBD1*00(50)	TRBJ1-1*00(240)		427|439|464|0|12||60.0	16|26|36|12|22||50.0	20|40|68|22|42||100.0		NA	NA	NA	NA	NA	NA	NA	NA	NA	NA	TGTGCCAGCAGTCAGGGGGCGCTGAACACTGAAGCTTTCTTT	21	NA	NA	NA	NA	NA	NA	NA	CASSQGALNTEAFF	NA	:::::::::0:-5:12:12:-4:2:22:22:0:42:::
BM27	83	1	0.000898	TGTGCCAGCAGTTTATCTTATAGGCTGAACACTGAAGCTTTCTTT	EEADEEEEEEAA?EDDD?DDDEEDDBAEEEEEEEEEEEEEEEEEE	TRBV28*00(190)		TRBJ1-1*00(240)		427|443|464|0|16||80.0		20|40|68|25|45||100.0		NA	NA	NA	NA	NA	NA	NA	NA	NA	NA	TGTGCCAGCAGTTTATCTTATAGGCTGAACACTGAAGCTTTCTTT	30	NA	NA	NA	NA	NA	NA	NA	CASSLSYRLNTEAFF	NA	:::::::::0:-1:16:::::25:0:45:::
BM27	84	1	0.000898	TGTGCCAGCAGTTTAGAGGCAGGCGGAAGGGAAAAACTGTTTTTT	ECAADBE8EEECDEEEEAEEDDCEE<EEDDEEECEE6EDEEEECD	TRBV28*00(220)		TRBJ1-4*00(205)		427|442|464|0|15||75.0		28|43|71|30|45||75.0		NA	NA	NA	NA	NA	NA	NA	NA	NA	NA	TGTGCCAGCAGTTTAGAGGCAGGCGGAAGGGAAAAACTGTTTTTT	21	NA	NA	NA	NA	NA	NA	NA	CASSLEAGGREKLFF	NA	:::::::::0:-2:15:::::30:-8:45:::
BM27	85	1	0.000898	TGTGCCAGCAGGGGACAGGGGGGTTCACCCCTCCACTTT	EEEDC@DEB7EEEDCDEECEBEE@>DCEE;E>6D8DEEC	TRBV28*00(195)	TRBD1*00(55)	TRBJ1-6*00(204)		427|438|464|0|11||55.0	12|23|36|11|22||55.0	29|45|73|23|39||80.0		NA	NA	NA	NA	NA	NA	NA	NA	NA	NA	TGTGCCAGCAGGGGACAGGGGGGTTCACCCCTCCACTTT	21	NA	NA	NA	NA	NA	NA	NA	CASRGQGGSPLHF	NA	:::::::::0:-6:11:11:0:-1:22:23:-9:39:::
BM27	86	1	0.000898	TGTGCCAGCAGGGCGCGGTCCTATAATTCACCCCTCCACTTT	CA?DDD;DB@DC<9<DEB?A;8?EADC:9AB9CC;8>88=D?	TRBV28*00(180)	TRBD1*00(25)	TRBJ1-6*00(244)		427|438|464|0|11||55.0	21|26|36|11|16||25.0	21|45|73|18|42||120.0		NA	NA	NA	NA	NA	NA	NA	NA	NA	NA	TGTGCCAGCAGGGCGCGGTCCTATAATTCACCCCTCCACTTT	23	NA	NA	NA	NA	NA	NA	NA	CASRARSYNSPLHF	NA	:::::::::0:-6:11:11:-9:2:16:18:-1:42:::
BM27	87	1	0.000898	TGTGCCAGCAGATACAGGGGTTCAGAGACCCAGTACTTC	EEEEEEEEEEEEEEEEDEDDEDEEEEEEB;DEDEEEEEB	TRBV28*00(220)	TRBD1*00(35)	TRBJ2-5*00(220)		427|438|464|0|11||55.0	15|22|36|13|20||35.0	24|40|68|23|39||80.0		NA	NA	NA	NA	NA	NA	NA	NA	NA	NA	TGTGCCAGCAGATACAGGGGTTCAGAGACCCAGTACTTC	26	NA	NA	NA	NA	NA	NA	NA	CASRYRGSETQYF	NA	:::::::::0:-6:11:13:-3:-2:20:23:-4:39:::
BM27	88	1	0.000898	TGTGCCAGCAGTTTCGGGGGGTTGGAGACCCAGTACTTC	>A?9AEC7>>><@A>BAD@EB;;D=@BCE@B=C=9CB?D	TRBV28*00(183)	TRBD1*00(25)	TRBJ2-5*00(215)		427|441|464|0|14||70.0	18|23|36|15|20||25.0	25|40|68|24|39||75.0		NA	NA	NA	NA	NA	NA	NA	NA	NA	NA	TGTGCCAGCAGTTTCGGGGGGTTGGAGACCCAGTACTTC	22	NA	NA	NA	NA	NA	NA	NA	CASSFGGLETQYF	NA	:::::::::0:-3:14:15:-6:-1:20:24:-5:39:::
BM27	90	1	0.000898	TGCAGCGTTGACCGGACAGGGGATGGAAACACCATATATTTT	EEDEEDE@EEE@AEEE@EEEEEEDEEDEEDECEEEEEEEEEE	TRBV29-1*00(180)	TRBD1*00(45)	TRBJ1-3*00(235)		421|432|455|0|11||55.0	13|22|36|13|22||45.0	23|42|70|23|42||95.0		NA	NA	NA	NA	NA	NA	NA	NA	NA	NA	TGCAGCGTTGACCGGACAGGGGATGGAAACACCATATATTTT	31	NA	NA	NA	NA	NA	NA	NA	CSVDRTGDGNTIYF	NA	:::::::::0:-3:11:13:-1:-2:22:23:-3:42:::
BM27	91	1	0.000898	TGCGCCAGCAGCGGGCAAGAGACCCAGTACTTC	DEAEE7EEDDDEEDEED@EEECEE<?EB;ED<E	TRBV5-1*00(255)		TRBJ2-5*00(230)		427|439|463|0|12||60.0		22|40|68|15|33||90.0		NA	NA	NA	NA	NA	NA	NA	NA	NA	NA	TGCGCCAGCAGCGGGCAAGAGACCCAGTACTTC	22	NA	NA	NA	NA	NA	NA	NA	CASSGQETQYF	NA	:::::::::0:-4:12:::::15:-2:33:::
BM27	92	1	0.000898	TGTGCCAGCACTGACTTTAACTATGGCTACACCTTC	EDEEEEE>CCBEDEAEDEDE=EDECEDED;E@CEEC	TRBV6-1*00(193),TRBV6-5*00(189),TRBV6-6*00(189),TRBV6-2*00(173),TRBV6-3*00(173)		TRBJ1-2*00(235)		427|441|464|0|14|SG437C|54.0;427|437|464|0|10||50.0;427|437|464|0|10||50.0;427|437|464|0|10||50.0;427|437|464|0|10||50.0		21|40|68|17|36||95.0		NA	NA	NA	NA	NA	NA	NA	NA	NA	NA	TGTGCCAGCACTGACTTTAACTATGGCTACACCTTC	26	NA	NA	NA	NA	NA	NA	NA	CASTDFNYGYTF	NA	:::::::::0:-3:14:::::17:-1:36:::
BM27	93	1	0.000898	TGTGCCAGCAGTGACGGGGCGAGCAATGAGCAGTTCTTC	BDDE=DDB;BDD?>DC;=<=D6E?D=EBDA>DCEC>EEE	TRBV6-1*00(190),TRBV6-5*00(180),TRBV6-6*00(180),TRBV6-4*00(179)	TRBD1*00(30)	TRBJ2-1*00(220)		427|441|464|0|14||70.0;427|439|464|0|12||60.0;427|439|464|0|12||60.0;427|442|464|0|15||75.0	19|25|36|15|21||30.0	26|42|70|23|39||80.0		NA	NA	NA	NA	NA	NA	NA	NA	NA	NA	TGTGCCAGCAGTGACGGGGCGAGCAATGAGCAGTTCTTC	21	NA	NA	NA	NA	NA	NA	NA	CASSDGASNEQFF	NA	:::::::::0:-3:14:15:-7:1:21:23:-6:39:::
BM27	94	1	0.000898	TGTGCCAGCAGTGAAGCCGGGTACGAGCAGTACTTC	EEEEDD?>EDEEEDEEEEEEDDEEEEEDEEEDEEEE	TRBV6-1*00(224),TRBV6-5*00(199),TRBV6-6*00(199),TRBV6-9*00(199)		TRBJ2-7*00(215)		427|444|464|0|17||85.0;427|439|464|0|12||60.0;427|439|464|0|12||60.0;427|439|464|0|12||60.0		24|39|67|21|36||75.0		NA	NA	NA	NA	NA	NA	NA	NA	NA	NA	TGTGCCAGCAGTGAAGCCGGGTACGAGCAGTACTTC	29	NA	NA	NA	NA	NA	NA	NA	CASSEAGYEQYF	NA	:::::::::0:0:17:::::21:-4:36:::
BM27	95	1	0.000898	TGTGCCAGCACCTCCCATGGAGGAAGAGGGAGTGAAGCTTTCTTT	EDE:8EE<E8:EB>AD=EDEDDDDEEDDC=@BD?ADCDEDEDCDD	TRBV6-2*00(160),TRBV6-3*00(160)	TRBD2*00(30)	TRBJ1-1*00(205)		427|437|464|0|10||50.0;427|437|464|0|10||50.0	1|7|48|10|16||30.0	27|40|68|32|45||65.0		NA	NA	NA	NA	NA	NA	NA	NA	NA	NA	TGTGCCAGCACCTCCCATGGAGGAAGAGGGAGTGAAGCTTTCTTT	23	NA	NA	NA	NA	NA	NA	NA	CASTSHGGRGSEAFF	NA	:::::::::0:-7:10:10:15:-25:16:32:-7:45:::
BM27	96	1	0.000898	TGTGCCAGCAGTTACGAGGGTCACGGCTACACCTTC	BEBDCDABE?DEDCEBDCBDC@DDEBEABEBEDDEC	TRBV6-2*00(230),TRBV6-3*00(230),TRBV6-5*00(214),TRBV6-6*00(214)	TRBD2*00(25)	TRBJ1-2*00(200)		427|442|464|0|15||75.0;427|442|464|0|15||75.0;427|442|464|0|15||75.0;427|442|464|0|15||75.0	27|32|48|15|20||25.0	28|40|68|24|36||60.0		NA	NA	NA	NA	NA	NA	NA	NA	NA	NA	TGTGCCAGCAGTTACGAGGGTCACGGCTACACCTTC	30	NA	NA	NA	NA	NA	NA	NA	CASSYEGHGYTF	NA	:::::::::0:-2:15:15:-11:0:20:24:-8:36:::
BM27	97	1	0.000898	TGTGCCAGCAGAATAACGGGAAACTATGGCTACACCTTC	BCDC=B@@EEED>CD;AE?EEC>@ED:ECDE=D@C@EDD	TRBV6-2*00(179),TRBV6-3*00(179),TRBV6-1*00(163),TRBV6-5*00(163),TRBV6-6*00(163)	TRBD1*00(25),TRBD2*00(25)	TRBJ1-2*00(230)		427|438|464|0|11||55.0;427|438|464|0|11||55.0;427|438|464|0|11||55.0;427|438|464|0|11||55.0;427|438|464|0|11||55.0	11|16|36|16|21||25.0;15|20|48|16|21||25.0	22|40|68|21|39||90.0		NA	NA	NA	NA	NA	NA	NA	NA	NA	NA	TGTGCCAGCAGAATAACGGGAAACTATGGCTACACCTTC	25	NA	NA	NA	NA	NA	NA	NA	CASRITGNYGYTF	NA	:::::::::0:-6:11:16:1:-8:21:21:-2:39:::
BM27	98	1	0.000898	TGTGCCAGCGAACCTGGACAGCTTTATGGCTACACCTTC	EEEEEEEEEEEEEEEEEEEEEEEEEEFEEE=EEEEEEEE	TRBV6-2*00(222),TRBV6-3*00(222)	TRBD1*00(30)	TRBJ1-2*00(215)		427|436|464|0|9||45.0;427|436|464|0|9||45.0	13|19|36|15|21||30.0	25|40|68|24|39||75.0		NA	NA	NA	NA	NA	NA	NA	NA	NA	NA	TGTGCCAGCGAACCTGGACAGCTTTATGGCTACACCTTC	28	NA	NA	NA	NA	NA	NA	NA	CASEPGQLYGYTF	NA	:::::::::0:-8:9:15:-1:-5:21:24:-5:39:::
BM27	99	1	0.000898	TGTGCCAGCAGTGAGCCTCAGGGTAATCAGCCCCAGCATTTT	DA7CDEDCEEEEE6D@EECEEDE6CEEA;CBEECE9<EEDEE	TRBV6-2*00(237),TRBV6-3*00(237),TRBV6-1*00(215)	TRBD1*00(25)	TRBJ1-5*00(103)		427|439|464|0|12||60.0;427|439|464|0|12||60.0;427|441|464|0|14||70.0	16|21|36|18|23||25.0	24|42|70|24|42||90.0		NA	NA	NA	NA	NA	NA	NA	NA	NA	NA	TGTGCCAGCAGTGAGCCTCAGGGTAATCAGCCCCAGCATTTT	21	NA	NA	NA	NA	NA	NA	NA	CASSEPQGNQPQHF	NA	:::::::::0:-5:12:18:-4:-3:23:24:-4:42:::
BM27	100	1	0.000898	TGTGCCAGCAGTACCCCGTGGGAGTCGTCGGGGGAGCTGTTTTTT	BEEEEEEEEECAEEEDE<EEEEEDEEBE7ECEEDE@DEDEEEEBE	TRBV6-2*00(170),TRBV6-3*00(170),TRBV6-1*00(154),TRBV6-5*00(154),TRBV6-6*00(154)	TRBD2*00(25)	TRBJ2-2*00(199)		427|439|464|0|12||60.0;427|439|464|0|12||60.0;427|439|464|0|12||60.0;427|439|464|0|12||60.0;427|439|464|0|12||60.0	25|30|48|19|24||25.0	28|43|71|30|45||75.0		NA	NA	NA	NA	NA	NA	NA	NA	NA	NA	TGTGCCAGCAGTACCCCGTGGGAGTCGTCGGGGGAGCTGTTTTTT	22	NA	NA	NA	NA	NA	NA	NA	CASSTPWESSGELFF	NA	:::::::::0:-5:12:19:-9:-2:24:30:-8:45:::
BM27	101	1	0.000898	TGTGCCAGCAACGACAGGGGAACCTACGAGCAGTACTTC	EEEBEDDEE@CDDCDDBDEEEBCDE7;DED:EED@DCDA	TRBV6-2*00(190),TRBV6-3*00(190),TRBV6-1*00(174),TRBV6-5*00(174),TRBV6-6*00(174)	TRBD1*00(40)	TRBJ2-7*00(145)		427|437|464|0|10||50.0;427|437|464|0|10||50.0;427|437|464|0|10||50.0;427|437|464|0|10||50.0;427|437|464|0|10||50.0	14|22|36|12|20||40.0	22|39|67|22|39||85.0		NA	NA	NA	NA	NA	NA	NA	NA	NA	NA	TGTGCCAGCAACGACAGGGGAACCTACGAGCAGTACTTC	22	NA	NA	NA	NA	NA	NA	NA	CASNDRGTYEQYF	NA	:::::::::0:-7:10:12:-2:-2:20:22:-2:39:::
BM27	102	1	0.000898	TGTGCCAGCAGGCTACAGGGAGGTGGCACTGAAGCTTTCTTT	CEEC>8EECECBCECAEEEEEDEEEC@DEEEEDDADEE@EEE	TRBV6-1*00(180),TRBV6-5*00(180),TRBV6-6*00(180),TRBV6-2*00(164),TRBV6-3*00(164)	TRBD1*00(30),TRBD2*00(30)	TRBJ1-1*00(220)		427|438|464|0|11||55.0;427|438|464|0|11||55.0;427|438|464|0|11||55.0;427|438|464|0|11||55.0;427|438|464|0|11||55.0	15|21|36|14|20||30.0;25|31|48|17|23||30.0	24|40|68|26|42||80.0		NA	NA	NA	NA	NA	NA	NA	NA	NA	NA	TGTGCCAGCAGGCTACAGGGAGGTGGCACTGAAGCTTTCTTT	23	NA	NA	NA	NA	NA	NA	NA	CASRLQGGGTEAFF	NA	:::::::::0:-6:11:14:-3:-3:20:26:-4:42:::
BM27	103	1	0.000898	TGTGCCAGCAGCCGAACAGGGATGGAGGGCTACACCTTC	D@DE:BEDDC:B@DE?EEDDECA@DEDAAEEDEDC?EDD	TRBV6-1*00(195),TRBV6-5*00(195),TRBV6-6*00(195),TRBV6-2*00(179),TRBV6-3*00(179)	TRBD1*00(30)	TRBJ1-2*00(200)		427|438|464|0|11||55.0;427|438|464|0|11||55.0;427|438|464|0|11||55.0;427|438|464|0|11||55.0;427|438|464|0|11||55.0	15|21|36|15|21||30.0	28|40|68|27|39||60.0		NA	NA	NA	NA	NA	NA	NA	NA	NA	NA	TGTGCCAGCAGCCGAACAGGGATGGAGGGCTACACCTTC	25	NA	NA	NA	NA	NA	NA	NA	CASSRTGMEGYTF	NA	:::::::::0:-6:11:15:-3:-3:21:27:-8:39:::
BM27	104	1	0.000898	TGTGCCAGCAGTTATCAGGGCAACTATGGCTACACCTTC	EEDEEEEEEEEEEEEEEEEEEEEEEEDEEEE<EBDEEEE	TRBV6-5*00(231),TRBV6-8*00(231),TRBV6-1*00(221),TRBV6-6*00(215),TRBV6-2*00(205)	TRBD1*00(25),TRBD2*00(25)	TRBJ1-2*00(140)		427|441|464|0|14||70.0;424|438|461|0|14||70.0;427|439|464|0|12||60.0;427|441|464|0|14||70.0;427|441|464|0|14||70.0	16|21|36|15|20||25.0;28|33|48|16|21||25.0	22|40|68|21|39||90.0		NA	NA	NA	NA	NA	NA	NA	NA	NA	NA	TGTGCCAGCAGTTATCAGGGCAACTATGGCTACACCTTC	27	NA	NA	NA	NA	NA	NA	NA	CASSYQGNYGYTF	NA	:::::::::0:-3:14:15:-4:-3:20:21:-2:39:::
BM27	105	1	0.000898	TGTGCCAGCAGTTACGGAAACACCATATATTTT	DE>>A;C?@?DB@A@>C9>9D<DE:D>@BDCD@	TRBV6-5*00(229),TRBV6-9*00(224),TRBV6-1*00(214),TRBV6-2*00(213),TRBV6-3*00(213)		TRBJ1-3*00(230)		427|442|464|0|15||75.0;427|441|464|0|14||70.0;427|439|464|0|12||60.0;427|442|464|0|15||75.0;427|442|464|0|15||75.0		24|42|70|15|33||90.0		NA	NA	NA	NA	NA	NA	NA	NA	NA	NA	TGTGCCAGCAGTTACGGAAACACCATATATTTT	24	NA	NA	NA	NA	NA	NA	NA	CASSYGNTIYF	NA	:::::::::0:-2:15:::::15:-4:33:::
BM27	106	1	0.000898	TGTGCCAGCAGTTATGACCCTAGCAATCAGCCCCAGCATTTT	CEEDADDBDCEEEEEED@D>EECECCDCEDA8<BD@B<:EEE	TRBV6-5*00(195),TRBV6-6*00(195),TRBV6-1*00(185),TRBV6-9*00(184),TRBV6-2*00(179)		TRBJ1-5*00(250)		427|441|464|0|14||70.0;427|441|464|0|14||70.0;427|439|464|0|12||60.0;427|442|464|0|15||75.0;427|441|464|0|14||70.0		20|42|70|20|42||110.0		NA	NA	NA	NA	NA	NA	NA	NA	NA	NA	TGTGCCAGCAGTTATGACCCTAGCAATCAGCCCCAGCATTTT	23	NA	NA	NA	NA	NA	NA	NA	CASSYDPSNQPQHF	NA	:::::::::0:-3:14:::::20:0:42:::
BM27	107	1	0.000898	TGTGCCAGCAGTTCGACAGTAGGCAATCAGCCCCAGCATTTT	BDEDB@EB6EDEDEDCCBEEEEDEECDDEEAC;BECEADEEE	TRBV6-5*00(190),TRBV6-6*00(190),TRBV6-1*00(185),TRBV6-2*00(174),TRBV6-3*00(174)	TRBD1*00(25)	TRBJ1-5*00(240)		427|440|464|0|13||65.0;427|440|464|0|13||65.0;427|439|464|0|12||60.0;427|440|464|0|13||65.0;427|440|464|0|13||65.0	14|19|36|14|19||25.0	22|42|70|22|42||100.0		NA	NA	NA	NA	NA	NA	NA	NA	NA	NA	TGTGCCAGCAGTTCGACAGTAGGCAATCAGCCCCAGCATTTT	21	NA	NA	NA	NA	NA	NA	NA	CASSSTVGNQPQHF	NA	:::::::::0:-4:13:14:-2:-5:19:22:-2:42:::
BM27	109	1	0.000898	TGTGCCAGCAGCCCAGCGGGAGTCAACTACAATGAGCAGTTCTTC	EE?DEBC8E=DDEEDCE=CE?==EC?EE;EEEEDECECCBAEE?C	TRBV6-1*00(145),TRBV6-4*00(145),TRBV6-5*00(145),TRBV6-6*00(145),TRBV10-3*00(129)	TRBD2*00(40)	TRBJ2-1*00(235)		427|438|464|0|11||55.0;427|438|464|0|11||55.0;427|438|464|0|11||55.0;427|438|464|0|11||55.0;427|438|464|0|11|ST434G|39.0	22|30|48|14|22||40.0	23|42|70|26|45||95.0		NA	NA	NA	NA	NA	NA	NA	NA	NA	NA	TGTGCCAGCAGCCCAGCGGGAGTCAACTACAATGAGCAGTTCTTC	23	NA	NA	NA	NA	NA	NA	NA	CASSPAGVNYNEQFF	NA	:::::::::0:-6:11:14:-6:-2:22:26:-3:45:::
BM27	110	1	0.000898	TGTGCCACCCGAAGGACAGGGGGCTGGGAGCAGTACTTC	DDDCACCDABADDBD=DBDECACDBDDDDCDCDDBCDAB	TRBV6-1*00(175),TRBV6-5*00(175),TRBV6-6*00(175),TRBV6-2*00(159),TRBV6-3*00(159)	TRBD1*00(55)	TRBJ2-7*00(200)		427|434|464|0|7||35.0;427|434|464|0|7||35.0;427|434|464|0|7||35.0;427|434|464|0|7||35.0;427|434|464|0|7||35.0	13|24|36|13|24||55.0	27|39|67|27|39||60.0		NA	NA	NA	NA	NA	NA	NA	NA	NA	NA	TGTGCCACCCGAAGGACAGGGGGCTGGGAGCAGTACTTC	28	NA	NA	NA	NA	NA	NA	NA	CATRRTGGWEQYF	NA	:::::::::0:-10:7:13:-1:0:24:27:-7:39:::
BM27	111	1	0.000898	TGTGCCAGCAGCCGGGGGTTAGGTCCTTACGAGCAGTACTTC	ED>ECBD7DE?C<@EDCEB;=EE;D9E<8?9DDBADBCAE?E	TRBV6-1*00(180),TRBV6-5*00(180),TRBV6-6*00(180),TRBV6-2*00(164),TRBV6-3*00(164)	TRBD1*00(25),TRBD2*00(25)	TRBJ2-7*00(215)		427|438|464|0|11||55.0;427|438|464|0|11||55.0;427|438|464|0|11||55.0;427|438|464|0|11||55.0;427|438|464|0|11||55.0	10|15|36|11|16||25.0;14|19|48|11|16||25.0	24|39|67|27|42||75.0		NA	NA	NA	NA	NA	NA	NA	NA	NA	NA	TGTGCCAGCAGCCGGGGGTTAGGTCCTTACGAGCAGTACTTC	22	NA	NA	NA	NA	NA	NA	NA	CASSRGLGPYEQYF	NA	:::::::::0:-6:11:11:2:-9:16:27:-4:42:::
BM27	112	1	0.000898	TGTGCCAGCAGCGAACGGACTCGGGGAAACACCATATATTTT	DDE;BED?EEEDEEACCEBEBEBEBEEEEE?DEEEEEEEEEE	TRBV7-9*00(185)	TRBD2*00(25)	TRBJ1-3*00(230)		430|442|467|0|12||60.0	17|22|48|16|21||25.0	24|42|70|24|42||90.0		NA	NA	NA	NA	NA	NA	NA	NA	NA	NA	TGTGCCAGCAGCGAACGGACTCGGGGAAACACCATATATTTT	26	NA	NA	NA	NA	NA	NA	NA	CASSERTRGNTIYF	NA	:::::::::0:-5:12:16:-1:-10:21:24:-4:42:::
BM27	113	1	0.000898	TGTGCCAGCAGCTTTCGGATGGCCTACGAGCAGTACTTC	EEEEDEEEEEEDEEEEEEEEEEEEEEEEEEEEEEDEEEE	TRBV7-9*00(210)		TRBJ2-7*00(225)		430|444|467|0|14||70.0		22|39|67|22|39||85.0		NA	NA	NA	NA	NA	NA	NA	NA	NA	NA	TGTGCCAGCAGCTTTCGGATGGCCTACGAGCAGTACTTC	35	NA	NA	NA	NA	NA	NA	NA	CASSFRMAYEQYF	NA	:::::::::0:-3:14:::::22:-2:39:::
BM27	114	1	0.000898	TGTGCCAGCAGCGTAGCTGGGGGAGGTCATGGCTACACCTTC	EDDE@ADEEDECEDEEBEEEEEDDEECD;EEEE@=ECDAEAD	TRBV9*00(215)	TRBD2*00(30)	TRBJ1-2*00(210)		427|445|463|0|18||90.0	25|31|48|20|26||30.0	26|40|68|28|42||70.0		NA	NA	NA	NA	NA	NA	NA	NA	NA	NA	TGTGCCAGCAGCGTAGCTGGGGGAGGTCATGGCTACACCTTC	26	NA	NA	NA	NA	NA	NA	NA	CASSVAGGGHGYTF	NA	:::::::::0:2:18:20:-9:-1:26:28:-6:42:::
BM28	264	11	0.0679012	TGTGCCAGCAGTTTACCCCTTTCCGGGACAGGGGGCACTGAAGCTTTCTTT	EEEEEDCEDEEEDEADDECEEED?EEDEEEDEDEEEDDEDED?DDEEEEEE	TRBV28*00(146.3)	TRBD1*00(65)	TRBJ1-1*00(214.7)		427|442|464|0|15||75.0	10|23|36|22|35||65.0	24|40|68|35|51||80.0		NA	NA	NA	NA	NA	NA	NA	NA	NA	NA	TGTGCCAGCAGTTTACCCCTTTCCGGGACAGGGGGCACTGAAGCTTTCTTT	30	NA	NA	NA	NA	NA	NA	NA	CASSLPLSGTGGTEAFF	NA	:::::::::0:-2:15:22:2:-1:35:35:-4:51:::
BM28	306	10	0.0617284	TGTGCCAGCAGCTTACGGGGGCTGGACACCGGGGAGCTGTTTTTT	EEEFEEFEEFEEFEEFEEEEEEEEFEEEEFEEEEEFEDFEEEEEF	TRBV11-1*00(70.8),TRBV11-3*00(64.4)	TRBD1*00(30)	TRBJ2-2*00(228.8)	TRBC2*00(339),TRBC1*00(319.8)	430|445|467|0|15||75.0;430|445|467|0|15||75.0	18|24|36|16|22||30.0	23|43|71|25|45||100.0	;	NA	NA	NA	NA	NA	NA	NA	NA	NA	NA	TGTGCCAGCAGCTTACGGGGGCTGGACACCGGGGAGCTGTTTTTT	35	NA	NA	NA	NA	NA	NA	NA	CASSLRGLDTGELFF	NA	:::::::::0:-2:15:16:-6:0:22:25:-3:45:::
BM28	307	10	0.0617284	TGTGCCAGCAGTCCCGGGGCCGGCCCGGGCTCCTACAATGAGCAGTTCTTC	EFEFEFEFEFEEFEEEFFEEEEEFEFFEEFEEEEEEFEEFFEEEFFEFFEE	TRBV27*00(376)	TRBD1*00(30),TRBD2*00(30)	TRBJ2-1*00(78)		427|439|464|0|12||60.0	9|15|36|12|18||30.0;13|19|48|12|18||30.0	19|42|70|28|51||115.0		NA	NA	NA	NA	NA	NA	NA	NA	NA	NA	TGTGCCAGCAGTCCCGGGGCCGGCCCGGGCTCCTACAATGAGCAGTTCTTC	36	NA	NA	NA	NA	NA	NA	NA	CASSPGAGPGSYNEQFF	NA	:::::::::0:-5:12:12:3:-9:18:28:1:51:::
BM28	308	10	0.0617284	TGTGCCAGCCACTTCGGGCAGGCAGGAGAGACCCAGTACTTC	FEEEEEEEFEFFEEEEEEEEEFEEFEEEEEEEEEEEEEEFEE	TRBV6-2*00(89),TRBV6-3*00(89)		TRBJ2-5*00(220)	TRBC2*00(289.8),TRBC1*00(259.4)	427|436|464|0|9||45.0;427|436|464|0|9||45.0		24|40|68|26|42||80.0	;	NA	NA	NA	NA	NA	NA	NA	NA	NA	NA	TGTGCCAGCCACTTCGGGCAGGCAGGAGAGACCCAGTACTTC	36	NA	NA	NA	NA	NA	NA	NA	CASHFGQAGETQYF	NA	:::::::::0:-8:9:::::26:-4:42:::
BM28	309	10	0.0617284	TGTGCCAGCAGCTTAGGGAGAACCCGGACCACAGATACGCAGTATTTT	FFFFFFFFFFFFEEFFFFFFFEFFFFFFFFFFFFFFEFFFFFEFFFFF	TRBV7-2*00(162),TRBV7-8*00(146),TRBV11-2*00(145)	TRBD1*00(25),TRBD2*00(25)	TRBJ2-3*00(235)		430|446|467|0|16||80.0;430|446|467|0|16||80.0;430|446|467|0|16||80.0	9|14|36|22|27||25.0;13|18|48|22|27||25.0	22|41|69|29|48||95.0		NA	NA	NA	NA	NA	NA	NA	NA	NA	NA	TGTGCCAGCAGCTTAGGGAGAACCCGGACCACAGATACGCAGTATTTT	36	NA	NA	NA	NA	NA	NA	NA	CASSLGRTRTTDTQYF	NA	:::::::::0:-1:16:22:3:-10:27:29:-2:48:::
BM28	431	8	0.0493827	TGTGCCAGCGTTAAGGGGGGGGGTGTCTCTGGAAACACCATATATTTT	EEEEEEEEEEEEEDEEFEEEEEEEEEEEEEEEEEEEEEEEEEEEEEEE	TRBV2*00(644)	TRBD1*00(30)	TRBJ1-3*00(99)		430|439|467|0|9||45.0	17|23|36|13|19||30.0	20|42|70|26|48||110.0		NA	NA	NA	NA	NA	NA	NA	NA	NA	NA	TGTGCCAGCGTTAAGGGGGGGGGTGTCTCTGGAAACACCATATATTTT	35	NA	NA	NA	NA	NA	NA	NA	CASVKGGGVSGNTIYF	NA	:::::::::0:-8:9:13:-5:-1:19:26:0:48:::
BM28	432	8	0.0493827	TGTGCCAGCAGTCCCCTCCTGTGGGGCACTGAAGCTTTCTTT	FEEEEFEEEEEEFFFEEFFEEEEEFEFFFFEEEEFFFFEFEF	TRBV27*00(170)	TRBD2*00(30)	TRBJ1-1*00(220)	TRBC1*00(170)	427|439|464|0|12||60.0	0|6|48|13|19||30.0	24|40|68|26|42||80.0		NA	NA	NA	NA	NA	NA	NA	NA	NA	NA	TGTGCCAGCAGTCCCCTCCTGTGGGGCACTGAAGCTTTCTTT	36	NA	NA	NA	NA	NA	NA	NA	CASSPLLWGTEAFF	NA	:::::::::0:-5:12:13:16:-26:19:26:-4:42:::
BM28	433	8	0.0493827	TGTGCCAGCAGTGACGGGACAGGGGAAGACTATGGCTACACCTTC	EEEDEEEDDEEEEECEEEEEEEEEDEEEEEEDEBEDEDDDBDEED	TRBV6-4*00(175.9)	TRBD1*00(50)	TRBJ1-2*00(222.7)		427|442|464|0|15||75.0	12|22|36|15|25||50.0	23|40|68|28|45||85.0		NA	NA	NA	NA	NA	NA	NA	NA	NA	NA	TGTGCCAGCAGTGACGGGACAGGGGAAGACTATGGCTACACCTTC	33	NA	NA	NA	NA	NA	NA	NA	CASSDGTGEDYGYTF	NA	:::::::::0:-2:15:15:0:-2:25:28:-3:45:::
BM28	523	7	0.0432099	TGTGCCAGCTTAAGTATGGAGGGGGCCCTCTCCGCCGAGCAGTACTTC	FFFEEFEEEFEFFFEEEEFFEEEEEEFFEFEEEEEEEFEEFEEEFEEE	TRBV7-2*00(364)	TRBD2*00(40),TRBD1*00(35)	TRBJ2-7*00(157)		430|439|467|0|9||45.0	29|37|48|22|30||40.0;17|24|36|19|26||35.0	26|39|67|35|48||65.0		NA	NA	NA	NA	NA	NA	NA	NA	NA	NA	TGTGCCAGCTTAAGTATGGAGGGGGCCCTCTCCGCCGAGCAGTACTTC	36	NA	NA	NA	NA	NA	NA	NA	CASLSMEGALSAEQYF	NA	:::::::::0:-8:9:22:-13:5:30:35:-6:48:::
BM28	627	6	0.037037	TGCAGTGCTAGAGTTAGCGGCTACGAGCAGTACTTC	FEEEFEFEEEEEEEEEEEFEEEEEEFFEFEFEEEEE	TRBV20-1*00(409)	TRBD2*00(30)	TRBJ2-7*00(220)	TRBC2*00(49)	421|434|455|0|13||65.0	21|27|48|14|20||30.0	23|39|67|20|36||80.0		NA	NA	NA	NA	NA	NA	NA	NA	NA	NA	TGCAGTGCTAGAGTTAGCGGCTACGAGCAGTACTTC	36	NA	NA	NA	NA	NA	NA	NA	CSARVSGYEQYF	NA	:::::::::0:-1:13:14:-5:-5:20:20:-3:36:::
BM28	735	5	0.0308642	TGTGCCAGCAGCTTAGTGTCAGCTTATGAAGCTTTCTTT	FFEFFEEEFEEEEEEEEFEEEEEEEEEEEEEEEEEEEEE	TRBV11-1*00(89),TRBV7-9*00(83)		TRBJ1-1*00(205)	TRBC1*00(482.8),TRBC2*00(450.8)	430|446|467|0|16||80.0;430|446|467|0|16||80.0		27|40|68|26|39||65.0	;	NA	NA	NA	NA	NA	NA	NA	NA	NA	NA	TGTGCCAGCAGCTTAGTGTCAGCTTATGAAGCTTTCTTT	36	NA	NA	NA	NA	NA	NA	NA	CASSLVSAYEAFF	NA	:::::::::0:-1:16:::::26:-7:39:::
BM28	839	4	0.0246914	TGTGCCACCAGCCCCGGGACCCGGGAGACCGGGGAGCTGTTTTTT	EEEEEEEEEEEEEEECEEEEEEEEEEEEEEEEEEEEEFEFEEEEF	TRBV24-1*00(260)	TRBD1*00(40),TRBD2*00(40)	TRBJ2-2*00(230)		427|438|465|0|11||55.0	9|17|36|12|20||40.0;13|21|48|12|20||40.0	25|43|71|27|45||90.0		NA	NA	NA	NA	NA	NA	NA	NA	NA	NA	TGTGCCACCAGCCCCGGGACCCGGGAGACCGGGGAGCTGTTTTTT	34	NA	NA	NA	NA	NA	NA	NA	CATSPGTRETGELFF	NA	:::::::::0:-7:11:12:3:-7:20:27:-5:45:::
BM28	840	4	0.0246914	TGTGCCAGCAGCCAATCCGGGACTAGCGGGAGCTCACCCGAGCAGTACTTC	EEEEEFEEEEEEEEEEEEEEEEEFEEEEEFFEFEEEEFEFFFEFFEEFEEE	TRBV27*00(248)	TRBD2*00(60)	TRBJ2-7*00(207)	TRBC2*00(92)	427|438|464|0|11||55.0	14|26|48|16|28||60.0	16|39|67|28|51|SC23AST24CSA25C|67.0		NA	NA	NA	NA	NA	NA	NA	NA	NA	NA	TGTGCCAGCAGCCAATCCGGGACTAGCGGGAGCTCACCCGAGCAGTACTTC	36	NA	NA	NA	NA	NA	NA	NA	CASSQSGTSGSSPEQYF	NA	:::::::::0:-6:11:16:2:-6:28:28:4:51:::
BM28	841	4	0.0246914	TGTGCCAGCAGCTTCCGGGACACTAACAATGAGCAGTTCTTC	EEEEEEEEEEEEEEEFEEEFEEFEFEEEEEEFFEEEEEEEEE	TRBV28*00(263)	TRBD1*00(40),TRBD2*00(35)	TRBJ2-1*00(225)		427|438|464|0|11||55.0	10|18|36|14|22||40.0;14|21|48|14|21||35.0	25|42|70|25|42||85.0		NA	NA	NA	NA	NA	NA	NA	NA	NA	NA	TGTGCCAGCAGCTTCCGGGACACTAACAATGAGCAGTTCTTC	36	NA	NA	NA	NA	NA	NA	NA	CASSFRDTNNEQFF	NA	:::::::::0:-6:11:14:2:-6:22:25:-5:42:::
BM28	842	4	0.0246914	TGTGCCAGCAGCCCCCAGAGCGGGGGGCGCTCACATACGCAGTATTTT	EFEFEEEEFEEEEEEEEEEEFFEEEEEEEFEEEEEEEEFEFFEEFEFE	TRBV9*00(586)	TRBD1*00(40)	TRBJ2-3*00(70)		427|439|463|0|12||60.0	18|26|36|22|30||40.0	27|41|69|34|48||70.0		NA	NA	NA	NA	NA	NA	NA	NA	NA	NA	TGTGCCAGCAGCCCCCAGAGCGGGGGGCGCTCACATACGCAGTATTTT	36	NA	NA	NA	NA	NA	NA	NA	CASSPQSGGRSHTQYF	NA	:::::::::0:-4:12:22:-6:2:30:34:-7:48:::
BM28	939	3	0.0185185	TGTGCCAGCAGTACTACAGGGATGAGAGGCTACACCTTC	EEEEEEEEEFFEEEEFEFEEEEEFEEEEEFEEFFEEEFE	TRBV28*00(188)	TRBD1*00(30)	TRBJ1-2*00(174)		427|439|464|0|12||60.0	15|21|36|15|21||30.0	28|40|68|27|39||60.0		NA	NA	NA	NA	NA	NA	NA	NA	NA	NA	TGTGCCAGCAGTACTACAGGGATGAGAGGCTACACCTTC	36	NA	NA	NA	NA	NA	NA	NA	CASSTTGMRGYTF	NA	:::::::::0:-5:12:15:-3:-3:21:27:-8:39:::
BM28	941	3	0.0185185	TGTGCCAGCAACGAAAATCCCGACGGAACCTCCTACGAGCAGTACTTC	FFEEFEEFEEEEEFEEFEFFEEEFFEEEFFEEFEEFFFEEFEEEFEEE	TRBV7-6*00(286),TRBV7-7*00(254)	TRBD1*00(25),TRBD2*00(25)	TRBJ2-7*00(86)		430|440|467|0|10||50.0;430|440|467|0|10||50.0	8|13|36|17|22||25.0;3|8|48|17|22||25.0	20|39|67|29|48||95.0		NA	NA	NA	NA	NA	NA	NA	NA	NA	NA	TGTGCCAGCAACGAAAATCCCGACGGAACCTCCTACGAGCAGTACTTC	36	NA	NA	NA	NA	NA	NA	NA	CASNENPDGTSYEQYF	NA	:::::::::0:-7:10:17:4:-11:22:29:0:48:::
BM28	1002	2	0.0123457	TGCGCCAGCAGTGAGAGCGAGATCCAAGAGACCCAGTACTTC	EC?CBCECCEEDEDEEEDDDEBDCDD?E@EEDEDEB>CDDED	TRBV10-2*00(222)		TRBJ2-5*00(190)		427|442|464|0|15||75.0		21|40|68|23|42||95.0		NA	NA	NA	NA	NA	NA	NA	NA	NA	NA	TGCGCCAGCAGTGAGAGCGAGATCCAAGAGACCCAGTACTTC	29	NA	NA	NA	NA	NA	NA	NA	CASSESEIQETQYF	NA	:::::::::0:-2:15:::::23:-1:42:::
BM28	1003	2	0.0123457	TGTGCCAGCAGTCAAGGGGACAGACAGCAGTTCTTC	EEEEEEDEEEEDEEDDEEEEEEDEEDEEEEEEECEE	TRBV12-3*00(195),TRBV12-4*00(195)	TRBD1*00(35)	TRBJ2-1*00(195)		430|442|467|0|12||60.0;430|442|467|0|12||60.0	12|19|36|16|23||35.0	31|42|70|25|36||55.0		NA	NA	NA	NA	NA	NA	NA	NA	NA	NA	TGTGCCAGCAGTCAAGGGGACAGACAGCAGTTCTTC	34	NA	NA	NA	NA	NA	NA	NA	CASSQGDRQQFF	NA	:::::::::0:-5:12:16:0:-5:23:25:-11:36:::
BM28	1004	2	0.0123457	TGTGCCAGCAGCCAATGGGGGACGTTAAATGGCTACACCTTC	EEEEDEEDEEECCD@EEEEEEEEEDEEEDEDEE<CEBEDDDE	TRBV16*00(195)	TRBD1*00(25),TRBD2*00(25)	TRBJ1-2*00(162)		430|446|467|0|16||80.0	12|17|36|18|23||25.0;16|21|48|18|23||25.0	26|40|68|28|42||70.0		NA	NA	NA	NA	NA	NA	NA	NA	NA	NA	TGTGCCAGCAGCCAATGGGGGACGTTAAATGGCTACACCTTC	27	NA	NA	NA	NA	NA	NA	NA	CASSQWGTLNGYTF	NA	:::::::::0:-1:16:18:0:-7:23:28:-6:42:::
BM28	1005	2	0.0123457	TGTGCCAGCAAACAGGGAGACTACACCTTC	CEDE=BCCEE>BE?EAE=;:CCAE<A?DED	TRBV2*00(272)	TRBD1*00(30)	TRBJ1-2*00(139.5)		430|440|467|0|10||50.0	15|21|36|11|17||30.0	30|40|68|20|30||50.0		NA	NA	NA	NA	NA	NA	NA	NA	NA	NA	TGTGCCAGCAAACAGGGAGACTACACCTTC	25	NA	NA	NA	NA	NA	NA	NA	CASKQGDYTF	NA	:::::::::0:-7:10:11:-3:-3:17:20:-10:30:::
BM28	1006	2	0.0123457	TGTGCCAGCAGTGAAGCGGCGGTTCTTGGCTACGAGCAGTACTTC	BECD@DCE<EEEBDE6BADEDEDDDBDDEDB:BDEEEEDE@EE>D	TRBV2*00(200)		TRBJ2-7*00(220)		430|448|467|0|18||90.0		23|39|67|29|45||80.0		NA	NA	NA	NA	NA	NA	NA	NA	NA	NA	TGTGCCAGCAGTGAAGCGGCGGTTCTTGGCTACGAGCAGTACTTC	21	NA	NA	NA	NA	NA	NA	NA	CASSEAAVLGYEQYF	NA	:::::::::0:1:18:::::29:-3:45:::
BM28	1009	2	0.0123457	TGTGCCAGCAGCTCCATCCGCTCCCTCTACAATGAGCAGTTCTTC	EDEDDE<EEDCDDEEBEEBCEED?CCEEACEEDCDEDEEDEDEDB	TRBV6-2*00(145),TRBV6-3*00(145)	TRBD2*00(25)	TRBJ2-1*00(235)		427|438|464|0|11||55.0;427|438|464|0|11||55.0	2|7|48|20|25||25.0	23|42|70|26|45||95.0		NA	NA	NA	NA	NA	NA	NA	NA	NA	NA	TGTGCCAGCAGCTCCATCCGCTCCCTCTACAATGAGCAGTTCTTC	27	NA	NA	NA	NA	NA	NA	NA	CASSSIRSLYNEQFF	NA	:::::::::0:-6:11:20:14:-25:25:26:-3:45:::
BM28	1011	2	0.0123457	TGTGCCAGCAGCGTAGGAACCGGGGAGCTGTTTTTT	FEEFEEEEEEEEEEEEEEEEEEEEEEEECEEEEEEE	TRBV9*00(114)		TRBJ2-2*00(230)	TRBC1*00(380),TRBC2*00(380)	427|443|463|0|16||80.0		25|43|71|18|36||90.0	;	NA	NA	NA	NA	NA	NA	NA	NA	NA	NA	TGTGCCAGCAGCGTAGGAACCGGGGAGCTGTTTTTT	34	NA	NA	NA	NA	NA	NA	NA	CASSVGTGELFF	NA	:::::::::0:0:16:::::18:-5:36:::
BM28	1047	1	0.00617284	TGTGCCATCAGTGAGCTACTACTGAGCTCCTACAATGAGCAGTTCTTC	EE?CEEEEEEDDDCADEDEEEEEEDEEEEEE?EDDEEEEEEBEEDD>D	TRBV10-3*00(267)		TRBJ2-1*00(265)		427|442|464|0|15||75.0		17|42|70|23|48||125.0		NA	NA	NA	NA	NA	NA	NA	NA	NA	NA	TGTGCCATCAGTGAGCTACTACTGAGCTCCTACAATGAGCAGTTCTTC	29	NA	NA	NA	NA	NA	NA	NA	CAISELLLSSYNEQFF	NA	:::::::::0:-2:15:::::23:3:48:::
BM28	1048	1	0.00617284	TGTGCCAGCAGCTTACGGGGGCTGGACACCGGGGAGCTATTTTTT	EEDEEECEEDE<CEEECDEEEE<EEE?CEDEEEEEEEDEDBEFEE	TRBV11-1*00(177),TRBV11-3*00(161)	TRBD1*00(30)	TRBJ2-2*00(172)	TRBC1*00(426),TRBC2*00(426)	430|445|467|0|15||75.0;430|445|467|0|15||75.0	18|24|36|16|22||30.0	23|43|71|25|45|SG36A|84.0	;	NA	NA	NA	NA	NA	NA	NA	NA	NA	NA	TGTGCCAGCAGCTTACGGGGGCTGGACACCGGGGAGCTATTTTTT	27	NA	NA	NA	NA	NA	NA	NA	CASSLRGLDTGELFF	NA	:::::::::0:-2:15:16:-6:0:22:25:-3:45:::
BM28	1049	1	0.00617284	TGTGCCAGCAGTTTAGCTGGTGAAGCTTTCTTT	E?DD?ECB8EEDED8E:EEEDDEAA@?EEEEAE	TRBV12-3*00(255),TRBV12-4*00(255)		TRBJ1-1*00(205)		430|447|467|0|17||85.0;430|447|467|0|17||85.0		27|40|68|20|33||65.0		NA	NA	NA	NA	NA	NA	NA	NA	NA	NA	TGTGCCAGCAGTTTAGCTGGTGAAGCTTTCTTT	23	NA	NA	NA	NA	NA	NA	NA	CASSLAGEAFF	NA	:::::::::0:0:17:::::20:-7:33:::
BM28	1050	1	0.00617284	TGTGCCAGCACCCGGACAGGGGAGAAAGCTTTCTTT	DDDABEB9B<E=CEE7BECE>EEEDBE<ECCAB<@<	TRBV12-3*00(179),TRBV12-4*00(179)	TRBD1*00(45)	TRBJ1-1*00(195)		430|440|467|0|10||50.0;430|440|467|0|10||50.0	13|22|36|13|22||45.0	29|40|68|25|36||55.0		NA	NA	NA	NA	NA	NA	NA	NA	NA	NA	TGTGCCAGCACCCGGACAGGGGAGAAAGCTTTCTTT	22	NA	NA	NA	NA	NA	NA	NA	CASTRTGEKAFF	NA	:::::::::0:-7:10:13:-1:-2:22:25:-9:36:::
BM28	1051	1	0.00617284	TGTGCCAGCAGGCCTGATCCTGGGCATGAAAAACTGTTTTTT	DEEEEEEEEDEEEEAED?B>BEEEEEEEDEECCAEEECBBEB	TRBV12-3*00(215),TRBV12-4*00(215)		TRBJ1-4*00(215)		430|441|467|0|11||55.0;430|441|467|0|11||55.0		26|43|71|25|42||85.0		NA	NA	NA	NA	NA	NA	NA	NA	NA	NA	TGTGCCAGCAGGCCTGATCCTGGGCATGAAAAACTGTTTTTT	29	NA	NA	NA	NA	NA	NA	NA	CASRPDPGHEKLFF	NA	:::::::::0:-6:11:::::25:-6:42:::
BM28	1052	1	0.00617284	TGTGCCAGCAGCACCACAGGGCTCCCGGTGATTGAAAAACTGTTTTTT	@EEDEECEEEEDBEEEED;CB@DE7EBEDEE;BECEEECBEEEEDEDD	TRBV12-3*00(185),TRBV12-4*00(185)	TRBD1*00(30),TRBD2*00(30)	TRBJ1-4*00(210)		430|441|467|0|11||55.0;430|441|467|0|11||55.0	8|14|36|22|28||30.0;2|8|48|21|27||30.0	27|43|71|32|48||80.0		NA	NA	NA	NA	NA	NA	NA	NA	NA	NA	TGTGCCAGCAGCACCACAGGGCTCCCGGTGATTGAAAAACTGTTTTTT	22	NA	NA	NA	NA	NA	NA	NA	CASSTTGLPVIEKLFF	NA	:::::::::0:-6:11:22:4:-10:28:32:-7:48:::
BM28	1053	1	0.00617284	TGTGCCAGCAGTTGGGTAGCGGGGAGTGAGCAGTTCTTC	EEEEEEEFEEEEEEFFDEEEEEEEEEEFEFEEEEEEEEE	TRBV12-3*00(258),TRBV12-4*00(258)	TRBD2*00(35)	TRBJ2-1*00(205)		430|443|467|0|13||65.0;430|443|467|0|13||65.0	21|28|48|16|23||35.0	29|42|70|26|39||65.0		NA	NA	NA	NA	NA	NA	NA	NA	NA	NA	TGTGCCAGCAGTTGGGTAGCGGGGAGTGAGCAGTTCTTC	35	NA	NA	NA	NA	NA	NA	NA	CASSWVAGSEQFF	NA	:::::::::0:-4:13:16:-5:-4:23:26:-9:39:::
BM28	1054	1	0.00617284	TGTGCCAGCAGTCGCCTCCTAGCGGGAGGTTACAATGAGCAGTTCTTC	EEEEEEEEEEEBEEEEEDEEDEEDEEEE?EEEDEDEEDEECEEEDEE@	TRBV12-3*00(253),TRBV12-4*00(253)	TRBD2*00(55)	TRBJ2-1*00(125)		430|442|467|0|12||60.0;430|442|467|0|12||60.0	20|31|48|18|29||55.0	24|42|70|30|48||90.0		NA	NA	NA	NA	NA	NA	NA	NA	NA	NA	TGTGCCAGCAGTCGCCTCCTAGCGGGAGGTTACAATGAGCAGTTCTTC	30	NA	NA	NA	NA	NA	NA	NA	CASSRLLAGGYNEQFF	NA	:::::::::0:-5:12:18:-4:-1:29:30:-4:48:::
BM28	1055	1	0.00617284	TGTGCCAGCAGTTTAGAGCTAGCGGACCCGTCCTACAATGAGCAGTTCTTC	EFEFEEEEEEFEEEEEFDEEEEEEEEEEEEEEEEEEEEEFEEEEEEDEEED	TRBV12-3*00(282),TRBV12-4*00(282)		TRBJ2-1*00(229)		430|451|467|0|21|SC446A|89.0;430|451|467|0|21|SC446A|89.0		21|42|70|30|51||105.0		NA	NA	NA	NA	NA	NA	NA	NA	NA	NA	TGTGCCAGCAGTTTAGAGCTAGCGGACCCGTCCTACAATGAGCAGTTCTTC	35	NA	NA	NA	NA	NA	NA	NA	CASSLELADPSYNEQFF	NA	:::::::::0:4:21:::::30:-1:51:::
BM28	1056	1	0.00617284	TGTGCCAGCAGTTCGACTAGCGGGGGCCCCACAGATACGCAGTATTTT	EEDEDEEDEEAECAEEEEEDEDDEEDDEECEEEECDEEEEDCDEDEEE	TRBV12-3*00(258),TRBV12-4*00(258)	TRBD2*00(50)	TRBJ2-3*00(219)		430|443|467|0|13||65.0;430|443|467|0|13||65.0	18|28|48|14|24||50.0	22|41|69|29|48||95.0		NA	NA	NA	NA	NA	NA	NA	NA	NA	NA	TGTGCCAGCAGTTCGACTAGCGGGGGCCCCACAGATACGCAGTATTTT	32	NA	NA	NA	NA	NA	NA	NA	CASSSTSGGPTDTQYF	NA	:::::::::0:-4:13:14:-2:-4:24:29:-2:48:::
BM28	1057	1	0.00617284	TGTGCCAGCAGTTTCACCTCGACTAGCGGAACCTACGAGCAGTACTTC	EEEAEEACEEEEE=EEEE?DEEEEEDEEEEEDEEEDEEEEEBEDEEEE	TRBV12-3*00(165),TRBV12-4*00(165)	TRBD2*00(45)	TRBJ2-7*00(225)		430|444|467|0|14||70.0;430|444|467|0|14||70.0	18|27|48|20|29||45.0	22|39|67|31|48||85.0		NA	NA	NA	NA	NA	NA	NA	NA	NA	NA	TGTGCCAGCAGTTTCACCTCGACTAGCGGAACCTACGAGCAGTACTTC	28	NA	NA	NA	NA	NA	NA	NA	CASSFTSTSGTYEQYF	NA	:::::::::0:-3:14:20:-2:-5:29:31:-2:48:::
BM28	1059	1	0.00617284	TGTGCCAGTAGCGACGGGATCAACACTGAAGCTTTCTTT	@FEEEECB:DE??EBAEEEAEDEEBBAE8EEE=BCBE@E	TRBV19*00(303)	TRBD1*00(25),TRBD2*00(25)	TRBJ1-1*00(230)		427|438|464|0|11||55.0	11|16|36|14|19||25.0;15|20|48|14|19||25.0	22|40|68|21|39||90.0		NA	NA	NA	NA	NA	NA	NA	NA	NA	NA	TGTGCCAGTAGCGACGGGATCAACACTGAAGCTTTCTTT	23	NA	NA	NA	NA	NA	NA	NA	CASSDGINTEAFF	NA	:::::::::0:-6:11:14:1:-8:19:21:-2:39:::
BM28	1060	1	0.00617284	TGTGCCAGTAGTGGATGGGGAACTGGTGAAGCTTTCTTT	EE>EDE?EDDECEE8CEDEDEC9EEECDDDE=DDE;DDE	TRBV19*00(200)		TRBJ1-1*00(205)		427|439|464|0|12||60.0		27|40|68|26|39||65.0		NA	NA	NA	NA	NA	NA	NA	NA	NA	NA	TGTGCCAGTAGTGGATGGGGAACTGGTGAAGCTTTCTTT	23	NA	NA	NA	NA	NA	NA	NA	CASSGWGTGEAFF	NA	:::::::::0:-5:12:::::26:-7:39:::
BM28	1062	1	0.00617284	TGTGCCAGCATGCAGGGCCCGACTGAAGCTTTCTTT	EEEDAD=DBE=C>>CDCC>DD?DD@CD;ADED@DDD	TRBV2*00(205)	TRBD2*00(35)	TRBJ1-1*00(215)		430|440|467|0|10||50.0	28|35|48|13|20||35.0	25|40|68|21|36||75.0		NA	NA	NA	NA	NA	NA	NA	NA	NA	NA	TGTGCCAGCATGCAGGGCCCGACTGAAGCTTTCTTT	26	NA	NA	NA	NA	NA	NA	NA	CASMQGPTEAFF	NA	:::::::::0:-7:10:13:-12:3:20:21:-5:36:::
BM28	1063	1	0.00617284	TGTGCCAGCAGCAGGGGAATTCAGCCCCAGCATTTT	EEEEDEEEDEEEEEEEEEEEEDEEEDCEE=ECEEEE	TRBV2*00(210)	TRBD1*00(30)	TRBJ1-5*00(220)		430|441|467|0|11||55.0	16|22|36|11|17||30.0	26|42|70|20|36||80.0		NA	NA	NA	NA	NA	NA	NA	NA	NA	NA	TGTGCCAGCAGCAGGGGAATTCAGCCCCAGCATTTT	28	NA	NA	NA	NA	NA	NA	NA	CASSRGIQPQHF	NA	:::::::::0:-6:11:11:-4:-2:17:20:-6:36:::
BM28	1064	1	0.00617284	TGTGCCAGCAGTGAATTAACGGTTGGTCAGCCCCAGCATTTT	EEEEEEEEEEEEEEDEECEEEEEEEEDEEEEEEEEEEDEEEE	TRBV2*00(200)		TRBJ1-5*00(220)		430|445|467|0|15||75.0		26|42|70|26|42||80.0		NA	NA	NA	NA	NA	NA	NA	NA	NA	NA	TGTGCCAGCAGTGAATTAACGGTTGGTCAGCCCCAGCATTTT	34	NA	NA	NA	NA	NA	NA	NA	CASSELTVGQPQHF	NA	:::::::::0:-2:15:::::26:-6:42:::
BM28	1065	1	0.00617284	TGTGCCTGCAGTGGGACAGGGGGTAATTCACCCCTCCACTTT	FEEEEEEEEEFFFEEEEEEEEEFEEEEEEEEEEFEEEEEFFE	TRBV2*00(174)	TRBD1*00(50)	TRBJ1-6*00(235)		430|443|467|0|13|SA436T|49.0	13|23|36|13|23||50.0	26|45|73|23|42||95.0		NA	NA	NA	NA	NA	NA	NA	NA	NA	NA	TGTGCCTGCAGTGGGACAGGGGGTAATTCACCCCTCCACTTT	36	NA	NA	NA	NA	NA	NA	NA	CACSGTGGNSPLHF	NA	:::::::::0:-4:13:13:-1:-1:23:23:-6:42:::
BM28	1067	1	0.00617284	TGTGCCAGCAGTTTATCGATAACTAGCGGGAGCGTCGGTGAGCAGTTCTTC	DB=8CEEECEE>@ACDDE8CABDB:E@EEC<DEEDE=AEECCCEE>9DD@:	TRBV27*00(170)	TRBD2*00(50)	TRBJ2-1*00(205)		427|449|464|0|22||110.0	20|30|48|22|32||50.0	29|42|70|38|51||65.0		NA	NA	NA	NA	NA	NA	NA	NA	NA	NA	TGTGCCAGCAGTTTATCGATAACTAGCGGGAGCGTCGGTGAGCAGTTCTTC	23	NA	NA	NA	NA	NA	NA	NA	CASSLSITSGSVGEQFF	NA	:::::::::0:5:22:22:-4:-2:32:38:-9:51:::
BM28	1068	1	0.00617284	TGTGCCAGCAGTTTCCCGGGACAGGGATACCACGAGCAGTACTTC	DACD@?ACDDCDBDAE=DE7?ECEE@DDDCC?BEBDEBDEC>BDC	TRBV27*00(180)	TRBD1*00(60)	TRBJ2-7*00(178)		427|441|464|0|14||70.0	9|21|36|14|26||60.0	25|39|67|31|45||70.0		NA	NA	NA	NA	NA	NA	NA	NA	NA	NA	TGTGCCAGCAGTTTCCCGGGACAGGGATACCACGAGCAGTACTTC	22	NA	NA	NA	NA	NA	NA	NA	CASSFPGQGYHEQYF	NA	:::::::::0:-3:14:14:3:-3:26:31:-5:45:::
BM28	1069	1	0.00617284	TGTGCCAGCAGCGAGTTTCAGACAGGGATGGCGCGGACTGAAGCTTTCTTT	EEEEA@DCDDDBEEEED?EEDBDDDEEDEDE@@BED@E?@EECDDD@BADC	TRBV28*00(135)	TRBD1*00(35)	TRBJ1-1*00(215)		427|438|464|0|11||55.0	14|21|36|20|27||35.0	25|40|68|36|51||75.0		NA	NA	NA	NA	NA	NA	NA	NA	NA	NA	TGTGCCAGCAGCGAGTTTCAGACAGGGATGGCGCGGACTGAAGCTTTCTTT	30	NA	NA	NA	NA	NA	NA	NA	CASSEFQTGMARTEAFF	NA	:::::::::0:-6:11:20:-2:-3:27:36:-5:51:::
BM28	1070	1	0.00617284	TGTGCCAGCAGTAGGCTCTACGAGCAGTACTTC	DDE@@A@ADC@E7BDCCCD?BBDCDCAC=D7DA	TRBV28*00(214)		TRBJ2-7*00(140)		427|439|464|0|12||60.0		23|39|67|17|33||80.0		NA	NA	NA	NA	NA	NA	NA	NA	NA	NA	TGTGCCAGCAGTAGGCTCTACGAGCAGTACTTC	22	NA	NA	NA	NA	NA	NA	NA	CASSRLYEQYF	NA	:::::::::0:-5:12:::::17:-3:33:::
BM28	1071	1	0.00617284	TGTGCCAGCAGTAGACAGGGGGTGATGTACGAGCAGTACTTC	CEEEEDEDEEE@EDEEEEDEEEDEEEECECEEEEAEACEEDE	TRBV28*00(185)	TRBD1*00(45)	TRBJ2-7*00(215)		427|439|464|0|12||60.0	14|23|36|13|22||45.0	24|39|67|27|42||75.0		NA	NA	NA	NA	NA	NA	NA	NA	NA	NA	TGTGCCAGCAGTAGACAGGGGGTGATGTACGAGCAGTACTTC	31	NA	NA	NA	NA	NA	NA	NA	CASSRQGVMYEQYF	NA	:::::::::0:-5:12:13:-2:-1:22:27:-4:42:::
BM28	1072	1	0.00617284	TGCAGCGCCGGACAGGGCCACACTGAAGCTTTCTTT	EEECEEEEEEEEEDEEEEEDEEEEEEEEDEEEEEEE	TRBV29-1*00(190)	TRBD1*00(40)	TRBJ1-1*00(225)		421|428|455|0|7||35.0	13|21|36|9|17||40.0	23|40|68|19|36||85.0		NA	NA	NA	NA	NA	NA	NA	NA	NA	NA	TGCAGCGCCGGACAGGGCCACACTGAAGCTTTCTTT	34	NA	NA	NA	NA	NA	NA	NA	CSAGQGHTEAFF	NA	:::::::::0:-7:7:9:-1:-3:17:19:-3:36:::
BM28	1073	1	0.00617284	TGCGCCAGCAGCTTGGAGCCGGTCGGAGGCTACACCTTC	DEEEEEEEEBEEEEEEDEEDEEDEEEEEEEDCEEEEEEE	TRBV5-1*00(220)		TRBJ1-2*00(200)		427|443|463|0|16||80.0		28|40|68|27|39||60.0		NA	NA	NA	NA	NA	NA	NA	NA	NA	NA	TGCGCCAGCAGCTTGGAGCCGGTCGGAGGCTACACCTTC	33	NA	NA	NA	NA	NA	NA	NA	CASSLEPVGGYTF	NA	:::::::::0:0:16:::::27:-8:39:::
BM28	1074	1	0.00617284	TGCGCCAGCAGTTTCTCCGGGAGGGATTCACCCCTCCACTTT	EDE@ACCAB?DDACCC@?EEDCDBECDDDD@CA@AAE?DCDE	TRBV5-1*00(180)	TRBD2*00(40)	TRBJ1-6*00(209)		427|438|463|0|11||55.0	24|32|48|17|25||40.0	28|45|73|25|42||85.0		NA	NA	NA	NA	NA	NA	NA	NA	NA	NA	TGCGCCAGCAGTTTCTCCGGGAGGGATTCACCCCTCCACTTT	30	NA	NA	NA	NA	NA	NA	NA	CASSFSGRDSPLHF	NA	:::::::::0:-5:11:17:-8:0:25:25:-8:42:::
BM28	1076	1	0.00617284	TGTGCCAGCAGAAGAGGACAGGGAGAAAAACTGTTTTTT	EECE8DADECDEDEB<E?DDDEECC@<<<@CCDEAEC>E	TRBV6-1*00(200),TRBV6-5*00(200),TRBV6-6*00(200),TRBV6-2*00(184),TRBV6-3*00(184)	TRBD1*00(40)	TRBJ1-4*00(205)		427|438|464|0|11||55.0;427|438|464|0|11||55.0;427|438|464|0|11||55.0;427|438|464|0|11||55.0;427|438|464|0|11||55.0	13|21|36|15|23||40.0	28|43|71|24|39||75.0		NA	NA	NA	NA	NA	NA	NA	NA	NA	NA	TGTGCCAGCAGAAGAGGACAGGGAGAAAAACTGTTTTTT	23	NA	NA	NA	NA	NA	NA	NA	CASRRGQGEKLFF	NA	:::::::::0:-6:11:15:-1:-3:23:24:-8:39:::
BM28	1077	1	0.00617284	TGTGCCAGCAGTTACGGTCTATTAGATACGCAGTATTTT	EEDBECEEEEEEEEEEEDDEBEEEEEDEEDDEEEDEECE	TRBV6-5*00(200),TRBV6-6*00(200),TRBV6-1*00(185),TRBV6-2*00(184),TRBV6-3*00(184)		TRBJ2-3*00(220)		427|442|464|0|15||75.0;427|442|464|0|15||75.0;427|439|464|0|12||60.0;427|442|464|0|15||75.0;427|442|464|0|15||75.0		25|41|69|23|39||80.0		NA	NA	NA	NA	NA	NA	NA	NA	NA	NA	TGTGCCAGCAGTTACGGTCTATTAGATACGCAGTATTTT	33	NA	NA	NA	NA	NA	NA	NA	CASSYGLLDTQYF	NA	:::::::::0:-2:15:::::23:-5:39:::
BM28	1078	1	0.00617284	TGTGCCAGCAGTCGCCAGGGGGTATACGAGCAGTACGTC	CDCDBEDCEE<BDEEEEEEEEEDDDCDAEEEEECDED@D	TRBV6-1*00(200),TRBV6-5*00(200),TRBV6-6*00(200),TRBV6-2*00(184),TRBV6-3*00(184)	TRBD1*00(35)	TRBJ2-7*00(199)		427|439|464|0|12||60.0;427|439|464|0|12||60.0;427|439|464|0|12||60.0;427|439|464|0|12||60.0;427|439|464|0|12||60.0	16|23|36|15|22||35.0	24|39|67|24|39|ST36G|59.0		NA	NA	NA	NA	NA	NA	NA	NA	NA	NA	TGTGCCAGCAGTCGCCAGGGGGTATACGAGCAGTACGTC	27	NA	NA	NA	NA	NA	NA	NA	CASSRQGVYEQYV	NA	:::::::::0:-5:12:15:-4:-1:22:24:-4:39:::
BM28	1079	1	0.00617284	TGTGCCAGCAGCTTTCAGGGTTTCTCCTACGAGCAGTACTTC	CDBDEE6?EAEED?BEAA>EEB@@@?DAE9@??>>BE6EDDD	TRBV7-2*00(195),TRBV7-8*00(179)	TRBD1*00(25)	TRBJ2-7*00(203)		430|444|467|0|14||70.0;430|444|467|0|14||70.0	16|21|36|15|20||25.0	20|39|67|23|42||95.0		NA	NA	NA	NA	NA	NA	NA	NA	NA	NA	TGTGCCAGCAGCTTTCAGGGTTTCTCCTACGAGCAGTACTTC	21	NA	NA	NA	NA	NA	NA	NA	CASSFQGFSYEQYF	NA	:::::::::0:-3:14:15:-4:-3:20:23:0:42:::
BM28	1080	1	0.00617284	TGTGCCAGCAGCTTCGACAAGAACACTGAAGCTTTCTTT	EDD>DDCCBEDEE6<;C<;E@@=E@?E@CBDDCEEBEEE	TRBV7-3*00(210)		TRBJ1-1*00(235)		430|444|467|0|14||70.0		21|40|68|20|39||95.0		NA	NA	NA	NA	NA	NA	NA	NA	NA	NA	TGTGCCAGCAGCTTCGACAAGAACACTGAAGCTTTCTTT	21	NA	NA	NA	NA	NA	NA	NA	CASSFDKNTEAFF	NA	:::::::::0:-3:14:::::20:-1:39:::
BM28	1082	1	0.00617284	TGTGCCAGCAGCTTAGGGAGTGGCGACGAGCAGTACTTC	EEECAEEBECEEEECECEEECBBEDDECBEEEDEEEDEC	TRBV7-3*00(215),TRBV7-4*00(188)	TRBD2*00(25)	TRBJ2-7*00(210)		430|445|467|0|15||75.0;430|446|467|0|16||80.0	25|30|48|15|20||25.0	25|39|67|25|39||70.0		NA	NA	NA	NA	NA	NA	NA	NA	NA	NA	TGTGCCAGCAGCTTAGGGAGTGGCGACGAGCAGTACTTC	32	NA	NA	NA	NA	NA	NA	NA	CASSLGSGDEQYF	NA	:::::::::0:-2:15:15:-9:-2:20:25:-5:39:::
BM28	1083	1	0.00617284	TGTGCCAGCAGCTTATTCTTTAGCGGGGACTCCTACGAGCAGTACTTC	EEEEECEDEEEDEEDEEEEEEEEEEEECEEAEEEEEEEEEEEEEEEEE	TRBV7-3*00(170),TRBV11-2*00(154),TRBV11-3*00(154),TRBV7-2*00(154),TRBV7-8*00(154)	TRBD2*00(35)	TRBJ2-7*00(235)		430|445|467|0|15||75.0;430|445|467|0|15||75.0;430|445|467|0|15||75.0;430|445|467|0|15||75.0;430|445|467|0|15||75.0	21|28|48|20|27||35.0	20|39|67|29|48||95.0		NA	NA	NA	NA	NA	NA	NA	NA	NA	NA	TGTGCCAGCAGCTTATTCTTTAGCGGGGACTCCTACGAGCAGTACTTC	32	NA	NA	NA	NA	NA	NA	NA	CASSLFFSGDSYEQYF	NA	:::::::::0:-2:15:20:-5:-4:27:29:0:48:::
BM28	1084	1	0.00617284	TGTGCCAGCAGCTTAGAGAACACCGGGGAGCTGTTTTTT	?EE?EA>EDEABADE:ECDDBA@CECDEDCCEC:EBE;>	TRBV7-9*00(220)		TRBJ2-2*00(234)		430|446|467|0|16||80.0		21|43|71|17|39||110.0		NA	NA	NA	NA	NA	NA	NA	NA	NA	NA	TGTGCCAGCAGCTTAGAGAACACCGGGGAGCTGTTTTTT	25	NA	NA	NA	NA	NA	NA	NA	CASSLENTGELFF	NA	:::::::::0:-1:16:::::17:-1:39:::
BM29	0	47	0.213636	TGTGCCAGCAGCGCTTTTGAGGGCCGCACAGATACGCAGTATTTT	FFEFFFFFFEFFEFFFFFFFFFFFFFFFFFFFFEFFFFFFFFFFF	TRBV2*00(313.3)	TRBD2*00(35)	TRBJ2-3*00(239.6)		430|441|467|0|11||55.0	27|34|48|18|25||35.0	21|41|69|25|45||100.0		NA	NA	NA	NA	NA	NA	NA	NA	NA	NA	TGTGCCAGCAGCGCTTTTGAGGGCCGCACAGATACGCAGTATTTT	36	NA	NA	NA	NA	NA	NA	NA	CASSAFEGRTDTQYF	NA	:::::::::0:-6:11:18:-11:2:25:25:-1:45:::
BM29	1	45	0.204545	TGCAGTGCTAGGGAGACTAGCGGGAGCGGAAACAATGAGCAGTTCTTC	FFFFFEFEFEFFFFFFFEFFEFEFFFEFFFFFEFEFEFFFFFFFFEFE	TRBV20-1*00(393)	TRBD2*00(60)	TRBJ2-1*00(225)		421|432|455|0|11||55.0	18|30|48|14|26||60.0	25|42|70|31|48||85.0		NA	NA	NA	NA	NA	NA	NA	NA	NA	NA	TGCAGTGCTAGGGAGACTAGCGGGAGCGGAAACAATGAGCAGTTCTTC	36	NA	NA	NA	NA	NA	NA	NA	CSARETSGSGNNEQFF	NA	:::::::::0:-3:11:14:-2:-2:26:31:-5:48:::
BM29	5	22	0.1	TGTGCCAGCAGTTTAATGAGTGAGGCGGACACTGAAGCTTTCTTT	EEEEEEEEEEEDEEEEEEEEEEEEDEEEEEEEDEEEEEEEEEEEE	TRBV28*00(176.2)		TRBJ1-1*00(224.2)		427|442|464|0|15||75.0		23|40|68|28|45||85.0		NA	NA	NA	NA	NA	NA	NA	NA	NA	NA	TGTGCCAGCAGTTTAATGAGTGAGGCGGACACTGAAGCTTTCTTT	35	NA	NA	NA	NA	NA	NA	NA	CASSLMSEADTEAFF	NA	:::::::::0:-2:15:::::28:-3:45:::
BM29	7	20	0.0909091	TGTGCCAGCAGGTCGGTTGGGGACTATGGCTACACCTTC	FFFFFFFFFFFFEEFFEFFFFFFFFFFFFFFFFFFFFFF	TRBV12-3*00(184),TRBV12-4*00(184)		TRBJ1-2*00(224.2)		430|441|467|0|11||55.0;430|441|467|0|11||55.0		23|40|68|22|39||85.0		NA	NA	NA	NA	NA	NA	NA	NA	NA	NA	TGTGCCAGCAGGTCGGTTGGGGACTATGGCTACACCTTC	36	NA	NA	NA	NA	NA	NA	NA	CASRSVGDYGYTF	NA	:::::::::0:-6:11:::::22:-3:39:::
BM29	8	20	0.0909091	TGTGCCAGCAGTGACGGGAGCACAGATACGCAGTATTTT	FFEFFFEFEEFFFEFFFFFFEFFFFEFEFFEFFEEFFFF	TRBV6-4*00(266.4)		TRBJ2-3*00(245)		427|442|464|0|15||75.0		20|41|69|18|39||105.0		NA	NA	NA	NA	NA	NA	NA	NA	NA	NA	TGTGCCAGCAGTGACGGGAGCACAGATACGCAGTATTTT	36	NA	NA	NA	NA	NA	NA	NA	CASSDGSTDTQYF	NA	:::::::::0:-2:15:::::18:0:39:::
BM29	9	17	0.0772727	TGTGCCAGCAGCCGGCTAGGAGGGAAAGGGGCTTACGAGCAGTACTTC	FFEEEFFEEEFFFEFEEEFEEEEEEFEEEEEFEEEEEEEEEFEEEEEE	TRBV4-2*00(322.2),TRBV4-3*00(306.2)	TRBD1*00(34),TRBD2*00(30)	TRBJ2-7*00(215)		427|440|464|0|13||65.0;427|440|464|0|13|SC429T|49.0	12|22|36|21|31|SC16A|34.0;26|32|48|18|24||30.0	24|39|67|33|48||75.0		NA	NA	NA	NA	NA	NA	NA	NA	NA	NA	TGTGCCAGCAGCCGGCTAGGAGGGAAAGGGGCTTACGAGCAGTACTTC	36	NA	NA	NA	NA	NA	NA	NA	CASSRLGGKGAYEQYF	NA	:::::::::0:-4:13:21:0:-2:31:33:-4:48:::
BM29	10	12	0.0545455	TGTGCCAGCAGTCCCATGACCTACGAGCAGTACTTC	FFFFFFFFFEFEFFFFFFEFFFEFFFFFFFEEFFFF	TRBV28*00(264)		TRBJ2-7*00(149.7)		427|439|464|0|12||60.0		22|39|67|19|36||85.0		NA	NA	NA	NA	NA	NA	NA	NA	NA	NA	TGTGCCAGCAGTCCCATGACCTACGAGCAGTACTTC	36	NA	NA	NA	NA	NA	NA	NA	CASSPMTYEQYF	NA	:::::::::0:-5:12:::::19:-2:36:::
BM29	11	9	0.0409091	TGCAGTGCCTCCCCGACAGGGTCGGATGGCTACACCTTC	EEFEFEEFFFFFFEFEFFFFEEEEFEFFEFEEFEEEFEE	TRBV20-1*00(378)	TRBD1*00(35)	TRBJ1-2*00(210)		421|429|455|0|8||40.0	14|21|36|14|21||35.0	26|40|68|25|39||70.0		NA	NA	NA	NA	NA	NA	NA	NA	NA	NA	TGCAGTGCCTCCCCGACAGGGTCGGATGGCTACACCTTC	36	NA	NA	NA	NA	NA	NA	NA	CSASPTGSDGYTF	NA	:::::::::0:-6:8:14:-2:-3:21:25:-6:39:::
BM29	12	7	0.0318182	TGTGCCAGCAGAACACAGGGAAGGGGGACTGAAGCTTTCTTT	EEEDEEEEEEEEBEDEDEEEEEECEEDAEEEEE@CEDCEDDE	TRBV6-1*00(171.9),TRBV6-5*00(171.9),TRBV6-6*00(171.9)	TRBD1*00(30)	TRBJ1-1*00(215)		427|438|464|0|11||55.0;427|438|464|0|11||55.0;427|438|464|0|11||55.0	15|21|36|14|20||30.0	25|40|68|27|42||75.0		NA	NA	NA	NA	NA	NA	NA	NA	NA	NA	TGTGCCAGCAGAACACAGGGAAGGGGGACTGAAGCTTTCTTT	31	NA	NA	NA	NA	NA	NA	NA	CASRTQGRGTEAFF	NA	:::::::::0:-6:11:14:-3:-3:20:27:-5:42:::
BM29	13	3	0.0136364	TGTGCCATCAGTGAGGATTACGAGCAGTACTTC	EDEEDDEDDEDEDEDBEDB@EDEBDEED@DAEE	TRBV10-3*00(237)		TRBJ2-7*00(215)		427|442|464|0|15||75.0		24|39|67|18|33||75.0		NA	NA	NA	NA	NA	NA	NA	NA	NA	NA	TGTGCCATCAGTGAGGATTACGAGCAGTACTTC	31	NA	NA	NA	NA	NA	NA	NA	CAISEDYEQYF	NA	:::::::::0:-2:15:::::18:-4:33:::
BM29	14	3	0.0136364	TGTGCCAGCAGTCCCTGGAGCAGGAGCAATGAAAAACTGTTTTTT	CD@D?DE<EDD:D<DBEDDEDBDEDEDCBEEDDEC?ADBDCDDDD	TRBV28*00(193)	TRBD1*00(25)	TRBJ1-4*00(220)		427|439|464|0|12||60.0	3|8|36|12|17||25.0	25|43|71|27|45||90.0		NA	NA	NA	NA	NA	NA	NA	NA	NA	NA	TGTGCCAGCAGTCCCTGGAGCAGGAGCAATGAAAAACTGTTTTTT	25	NA	NA	NA	NA	NA	NA	NA	CASSPWSRSNEKLFF	NA	:::::::::0:-5:12:12:9:-16:17:27:-5:45:::
BM29	15	2	0.00909091	TGTGCCAGCAGTTTAGCGGGAGTCCACGAGCAGTACTTC	CEDEDBDE;BEECEDE>EEEEE>DEEEEEEDEEEDDEE@	TRBV12-3*00(230),TRBV12-4*00(230)	TRBD2*00(25)	TRBJ2-7*00(194)		430|448|467|0|18||90.0;430|448|467|0|18||90.0	10|15|48|20|25||25.0	25|39|67|25|39||70.0		NA	NA	NA	NA	NA	NA	NA	NA	NA	NA	TGTGCCAGCAGTTTAGCGGGAGTCCACGAGCAGTACTTC	26	NA	NA	NA	NA	NA	NA	NA	CASSLAGVHEQYF	NA	:::::::::0:1:18:20:6:-17:25:25:-5:39:::
BM29	16	2	0.00909091	TGTGCCAGCAGTTACAGGTTTGGGTTGGGGGAGACCCAGTACTTC	CCBEDEDD<AC;A9ECEE?DAECE>EEDE<CCE@A@DCDBADDD=	TRBV6-5*00(170),TRBV6-6*00(170),TRBV6-1*00(155),TRBV6-2*00(154),TRBV6-3*00(154)		TRBJ2-5*00(215)		427|442|464|0|15||75.0;427|442|464|0|15||75.0;427|439|464|0|12||60.0;427|442|464|0|15||75.0;427|442|464|0|15||75.0		25|40|68|30|45||75.0		NA	NA	NA	NA	NA	NA	NA	NA	NA	NA	TGTGCCAGCAGTTACAGGTTTGGGTTGGGGGAGACCCAGTACTTC	24	NA	NA	NA	NA	NA	NA	NA	CASSYRFGLGETQYF	NA	:::::::::0:-2:15:::::30:-5:45:::
BM29	17	2	0.00909091	TGTGCCAGCAGTTATCTGTATGAAGCAACTAATGAAAAACTGTTTTTT	DEED9B@CDCDCAB7DDEEECBD>B@A7EDEE=DB@DDEBEB@CC=:E	TRBV6-9*00(220.5),TRBV6-6*00(215.5),TRBV6-1*00(213.5)		TRBJ1-4*00(190)		427|442|464|0|15||75.0;427|441|464|0|14||70.0;427|439|464|0|12||60.0		19|43|71|24|48||120.0		NA	NA	NA	NA	NA	NA	NA	NA	NA	NA	TGTGCCAGCAGTTATCTGTATGAAGCAACTAATGAAAAACTGTTTTTT	22	NA	NA	NA	NA	NA	NA	NA	CASSYLYEATNEKLFF	NA	:::::::::0:-2:15:::::24:1:48:::
BM29	18	1	0.00454546	TGCGCCAGCAGCGAAAGGACCTATGGCTACACCTTC	CD@AEDEEEDCDEEDEDECDAB>DBBDECDCBDD6E	TRBV10-2*00(210)		TRBJ1-2*00(220)		427|438|464|0|11||55.0		24|40|68|20|36||80.0		NA	NA	NA	NA	NA	NA	NA	NA	NA	NA	TGCGCCAGCAGCGAAAGGACCTATGGCTACACCTTC	21	NA	NA	NA	NA	NA	NA	NA	CASSERTYGYTF	NA	:::::::::0:-6:11:::::20:-4:36:::
BM29	19	1	0.00454546	TGCGCCAGCAGTGAGTCGGGTCTGGGCAGGGGGGACAGCAATCAGCCCCAGCATTTT	DC?DDEEEBEDEEE@ECEEEABEECECDEEEEE8DEEDEEDEEEEE@;=CA@EEEEE	TRBV10-2*00(140)	TRBD1*00(35)	TRBJ1-5*00(245)		427|445|464|0|18||90.0	16|23|36|26|33||35.0	21|42|70|36|57||105.0		NA	NA	NA	NA	NA	NA	NA	NA	NA	NA	TGCGCCAGCAGTGAGTCGGGTCTGGGCAGGGGGGACAGCAATCAGCCCCAGCATTTT	23	NA	NA	NA	NA	NA	NA	NA	CASSESGLGRGDSNQPQHF	NA	:::::::::0:1:18:26:-4:-1:33:36:-1:57:::
BM29	21	1	0.00454546	TGTGCCAGCAGCCATACTGGTACTCAGCCCCAGCATTTT	EEEDBDB@DDE@EDDDEEEEEBE;D@CC<DCDEBBBDAE	TRBV16*00(210)		TRBJ1-5*00(220)		430|444|467|0|14||70.0		26|42|70|23|39||80.0		NA	NA	NA	NA	NA	NA	NA	NA	NA	NA	TGTGCCAGCAGCCATACTGGTACTCAGCCCCAGCATTTT	26	NA	NA	NA	NA	NA	NA	NA	CASSHTGTQPQHF	NA	:::::::::0:-3:14:::::23:-6:39:::
BM29	25	1	0.00454546	TGCAGCGTTGAGCCGGCTGGGGCCAACGTCCTGACTTTC	EDEAEEEEEBEEEDEEEEDEDDEEEDEEAEEDEEEEEEE	TRBV29-1*00(278)		TRBJ2-6*00(255)		421|432|455|0|11||55.0		22|45|73|16|39||115.0		NA	NA	NA	NA	NA	NA	NA	NA	NA	NA	TGCAGCGTTGAGCCGGCTGGGGCCAACGTCCTGACTTTC	32	NA	NA	NA	NA	NA	NA	NA	CSVEPAGANVLTF	NA	:::::::::0:-3:11:::::16:-2:39:::
BM29	26	1	0.00454546	TGTGCCTGGAGAGCGCGGACAGTCCGCTCCTACGAGCAGTACTTC	:E7EEEEEFEDEEEEEEEDDBE=BE?C@EDCE;EDEEEEEEE@A9	TRBV30*00(573)	TRBD1*00(30)	TRBJ2-7*00(240)		421|432|455|0|11||55.0	13|19|36|16|22||30.0	19|39|67|25|45||100.0		NA	NA	NA	NA	NA	NA	NA	NA	NA	NA	TGTGCCTGGAGAGCGCGGACAGTCCGCTCCTACGAGCAGTACTTC	22	NA	NA	NA	NA	NA	NA	NA	CAWRARTVRSYEQYF	NA	:::::::::0:-3:11:16:-1:-5:22:25:1:45:::
BM29	27	1	0.00454546	TGTGCCAGCAGTTATGATCCTTCTGGGGCCAACGTCCTGACTTTC	DE<EDEEDEEE>>7CE<ADDE>EADEEDED6CDEEDEEDAECEED	TRBV6-2*00(180),TRBV6-3*00(180),TRBV6-5*00(164),TRBV6-6*00(164)		TRBJ2-6*00(244)		427|441|464|0|14||70.0;427|441|464|0|14||70.0;427|441|464|0|14||70.0;427|441|464|0|14||70.0		21|45|73|21|45||120.0		NA	NA	NA	NA	NA	NA	NA	NA	NA	NA	TGTGCCAGCAGTTATGATCCTTCTGGGGCCAACGTCCTGACTTTC	21	NA	NA	NA	NA	NA	NA	NA	CASSYDPSGANVLTF	NA	:::::::::0:-3:14:::::21:-1:45:::
BM29	28	1	0.00454546	TGTGCCAGCAGTTACTCGGGGACTCGGGAGCTGTTTTTT	CEEE@EADDDE>;<DDAAEDEDC==EDEDDABDE<DCDC	TRBV6-5*00(230),TRBV6-6*00(230),TRBV6-2*00(214),TRBV6-3*00(214),TRBV6-8*00(214)	TRBD2*00(30)	TRBJ2-2*00(210)		427|445|464|0|18||90.0;427|445|464|0|18||90.0;427|445|464|0|18||90.0;427|445|464|0|18||90.0;424|442|461|0|18||90.0	16|22|48|18|24||30.0	29|43|71|25|39||70.0		NA	NA	NA	NA	NA	NA	NA	NA	NA	NA	TGTGCCAGCAGTTACTCGGGGACTCGGGAGCTGTTTTTT	26	NA	NA	NA	NA	NA	NA	NA	CASSYSGTRELFF	NA	:::::::::0:1:18:18:0:-10:24:25:-9:39:::
BM29	29	1	0.00454546	TGTGCCAGCAGTTTCGAGAGAGCGGGAGGGCCAAAAGATACGCAGTATTTT	EEEEECDDDEEEEDEEEEEDDDBEEEEEECC?EDDEEBE;DEECEEDEECE	TRBV6-2*00(130),TRBV6-3*00(130),TRBV6-5*00(130),TRBV6-6*00(130),TRBV6-4*00(125)	TRBD2*00(60)	TRBJ2-3*00(220)		427|440|464|0|13||65.0;427|440|464|0|13||65.0;427|440|464|0|13||65.0;427|440|464|0|13||65.0;427|439|464|0|12||60.0	22|34|48|20|32||60.0	25|41|69|35|51||80.0		NA	NA	NA	NA	NA	NA	NA	NA	NA	NA	TGTGCCAGCAGTTTCGAGAGAGCGGGAGGGCCAAAAGATACGCAGTATTTT	26	NA	NA	NA	NA	NA	NA	NA	CASSFERAGGPKDTQYF	NA	:::::::::0:-4:13:20:-6:2:32:35:-5:51:::
BM29	30	1	0.00454546	TGTGCCAGCAGCCACGAGGGGGTCGTAAATCAGCCCCAGCATTTT	EDEDDEEEDEEDDFCEEEEFFE:DEDDDEEDDEEEDDBDE@DAED	TRBV7-8*00(221),TRBV7-2*00(199)	TRBD1*00(30)	TRBJ1-5*00(230)		430|442|467|0|12||60.0;430|442|467|0|12||60.0	17|23|36|16|22||30.0	24|42|70|27|45||90.0		NA	NA	NA	NA	NA	NA	NA	NA	NA	NA	TGTGCCAGCAGCCACGAGGGGGTCGTAAATCAGCCCCAGCATTTT	25	NA	NA	NA	NA	NA	NA	NA	CASSHEGVVNQPQHF	NA	:::::::::0:-5:12:16:-5:-1:22:27:-4:45:::
BM30	3	47	0.299363	TGTGCCAGCAGTGAATACGGGACGGATCAGCCCCAGCATTTT	FFFFFFFFFFFEFFFEFFFFFFFFFFFFFFFFFFFFFFFFFF	TRBV2*00(333.3)	TRBD1*00(30),TRBD2*00(30)	TRBJ1-5*00(225)		430|445|467|0|15||75.0	11|17|36|17|23||30.0;15|21|48|17|23||30.0	25|42|70|25|42||85.0		NA	NA	NA	NA	NA	NA	NA	NA	NA	NA	TGTGCCAGCAGTGAATACGGGACGGATCAGCCCCAGCATTTT	36	NA	NA	NA	NA	NA	NA	NA	CASSEYGTDQPQHF	NA	:::::::::0:-2:15:17:1:-7:23:25:-5:42:::
BM30	6	41	0.261146	TGCAGTGCTAGGGGAATGCATGGCTACACCTTC	FFFFFFFFFFFFFFFFFFFFFFFFEFFEFFFFF	TRBV20-1*00(392.6)		TRBJ1-2*00(130)		421|432|455|0|11||55.0		26|40|68|19|33||70.0		NA	NA	NA	NA	NA	NA	NA	NA	NA	NA	TGCAGTGCTAGGGGAATGCATGGCTACACCTTC	36	NA	NA	NA	NA	NA	NA	NA	CSARGMHGYTF	NA	:::::::::0:-3:11:::::19:-6:33:::
BM30	15	8	0.0509554	TGTGCCAGCAGTTCCGGAGCTCTCTACGAGCAGTACTTC	EEDAEEEDEDEDEEEDEEEEEEEEEEEEEECEAEDECEE	TRBV27*00(205.2)		TRBJ2-7*00(200)		427|440|464|0|13||65.0		16|39|67|15|39|I23T|94.0		NA	NA	NA	NA	NA	NA	NA	NA	NA	NA	TGTGCCAGCAGTTCCGGAGCTCTCTACGAGCAGTACTTC	32	NA	NA	NA	NA	NA	NA	NA	CASSSGALYEQYF	NA	:::::::::0:-4:13:::::15:4:39:::
BM30	16	7	0.044586	TGCGCCAGCAGTGCCTGGACAGGGTCTGGAAACACCATATATTTT	EEEEEEDDEAEDEEEBEDAECDDEEFCEECCCECDEECEE@EEED	TRBV10-1*00(175.3)	TRBD1*00(40)	TRBJ1-3*00(225.4)		427|440|464|0|13||65.0	13|21|36|16|24||40.0	21|42|70|24|45||105.0		NA	NA	NA	NA	NA	NA	NA	NA	NA	NA	TGCGCCAGCAGTGCCTGGACAGGGTCTGGAAACACCATATATTTT	31	NA	NA	NA	NA	NA	NA	NA	CASSAWTGSGNTIYF	NA	:::::::::0:-4:13:16:-1:-3:24:24:-1:45:::
BM30	17	5	0.0318471	TGTGCCAGCAGTGAATATGAGAGTGGTAACACTGAAGCTTTCTTT	DEDD?DEEDDEDEEDDDECEEECEAEEE@EBEEDBEDCDEDEEDE	TRBV2*00(185)		TRBJ1-1*00(190)		430|445|467|0|15||75.0		22|40|68|27|45||90.0		NA	NA	NA	NA	NA	NA	NA	NA	NA	NA	TGTGCCAGCAGTGAATATGAGAGTGGTAACACTGAAGCTTTCTTT	30	NA	NA	NA	NA	NA	NA	NA	CASSEYESGNTEAFF	NA	:::::::::0:-2:15:::::27:-2:45:::
BM30	18	2	0.0127389	TGCGCCAGCACGGGACACCTCAATGAAAAACTGTTTTTT	EECDDDEEEECD8EC?AE>EEEEEEEEEEECEDEEEE@D	TRBV10-2*00(226),TRBV10-1*00(210)	TRBD1*00(35),TRBD2*00(30)	TRBJ1-4*00(139)		427|437|464|0|10||50.0;427|437|464|0|10||50.0	11|18|36|10|17||35.0;15|21|48|10|16||30.0	25|43|71|21|39||90.0		NA	NA	NA	NA	NA	NA	NA	NA	NA	NA	TGCGCCAGCACGGGACACCTCAATGAAAAACTGTTTTTT	23	NA	NA	NA	NA	NA	NA	NA	CASTGHLNEKLFF	NA	:::::::::0:-7:10:10:1:-6:17:21:-5:39:::
BM30	19	2	0.0127389	TGTGCCAGCAGTCGGGCAAGAGCTTTCTTT	DC?BDEDDC=E;EECEECD@@CEA=AEDAD	TRBV12-3*00(217),TRBV12-4*00(217)		TRBJ1-1*00(182.5)		430|442|467|0|12||60.0;430|442|467|0|12||60.0		30|40|68|20|30||50.0		NA	NA	NA	NA	NA	NA	NA	NA	NA	NA	TGTGCCAGCAGTCGGGCAAGAGCTTTCTTT	26	NA	NA	NA	NA	NA	NA	NA	CASSRARAFF	NA	:::::::::0:-5:12:::::20:-10:30:::
BM30	20	2	0.0127389	TGTGCCAGTAGTATGAGGAAGACGGGATATAACACTGAAGCTTTCTTT	ECEDDDEDDE@EDECDBDE?ECDEEDEEEEDDCDDEEEEADEECAEEE	TRBV19*00(149)	TRBD1*00(25),TRBD2*00(25)	TRBJ1-1*00(230)		427|441|464|0|14||70.0	11|16|36|22|27||25.0;15|20|48|22|27||25.0	22|40|68|30|48||90.0		NA	NA	NA	NA	NA	NA	NA	NA	NA	NA	TGTGCCAGTAGTATGAGGAAGACGGGATATAACACTGAAGCTTTCTTT	30	NA	NA	NA	NA	NA	NA	NA	CASSMRKTGYNTEAFF	NA	:::::::::0:-3:14:22:1:-8:27:30:-2:48:::
BM30	21	2	0.0127389	TGTGCCAGCAGTAAGGGGACAGGGAATTCACCCCTCCACTTT	CEDECDAEDCEDEDEDEEEEDEDDDDDCEDE?ED@@EEEEEE	TRBV2*00(185)	TRBD1*00(45)	TRBJ1-6*00(206)		430|442|467|0|12||60.0	12|21|36|15|24||45.0	27|45|73|24|42||90.0		NA	NA	NA	NA	NA	NA	NA	NA	NA	NA	TGTGCCAGCAGTAAGGGGACAGGGAATTCACCCCTCCACTTT	30	NA	NA	NA	NA	NA	NA	NA	CASSKGTGNSPLHF	NA	:::::::::0:-5:12:15:0:-3:24:24:-7:42:::
BM30	22	2	0.0127389	TGCAGCGGCCGGGGGGTACAAGAGACCCAGTACTTC	EEEEEEEEEEEEEEADCEEEFEEEDEEEEEEEEEE?	TRBV29-1*00(258)	TRBD1*00(25),TRBD2*00(25)	TRBJ2-5*00(119.5)		421|428|455|0|7||35.0	10|15|36|8|13||25.0;14|19|48|8|13||25.0	22|40|68|18|36||90.0		NA	NA	NA	NA	NA	NA	NA	NA	NA	NA	TGCAGCGGCCGGGGGGTACAAGAGACCCAGTACTTC	30	NA	NA	NA	NA	NA	NA	NA	CSGRGVQETQYF	NA	:::::::::0:-7:7:8:2:-9:13:18:-2:36:::
BM30	23	2	0.0127389	TGTGCCAGCAGCCAGGGGGGGACAGGGAACACTGAAGCTTTCTTT	DE>DEEEEDECEDBEEEEEEDEEEDDEEAEEAEEDEEDC=ECDDE	TRBV7-6*00(154),TRBV7-7*00(138)	TRBD1*00(40)	TRBJ1-1*00(227)		430|442|467|0|12||60.0;430|442|467|0|12||60.0	12|20|36|18|26||40.0	21|40|68|26|45||95.0		NA	NA	NA	NA	NA	NA	NA	NA	NA	NA	TGTGCCAGCAGCCAGGGGGGGACAGGGAACACTGAAGCTTTCTTT	28	NA	NA	NA	NA	NA	NA	NA	CASSQGGTGNTEAFF	NA	:::::::::0:-5:12:18:0:-4:26:26:-1:45:::
BM30	24	1	0.00636943	TGCGCCAGCAGGAGACTAGCGGAATACAATGAGCAGTTCTTC	DD?BBEEEDEAEECBEEDDEEEEDEDEEBE?E>EEEEECEEA	TRBV10-2*00(164)	TRBD2*00(45)	TRBJ2-1*00(150)		427|438|464|0|11||55.0	18|27|48|13|22||45.0	24|42|70|24|42||90.0		NA	NA	NA	NA	NA	NA	NA	NA	NA	NA	TGCGCCAGCAGGAGACTAGCGGAATACAATGAGCAGTTCTTC	29	NA	NA	NA	NA	NA	NA	NA	CASRRLAEYNEQFF	NA	:::::::::0:-6:11:13:-2:-5:22:24:-4:42:::
BM30	25	1	0.00636943	TGTGCCAGCAGCTTAGAGGGTAGGGGGCGAGCTTTCTTT	CCCE@E@DEEEE@EE@ADCCAE?EBB@EDEBE?EEECDE	TRBV11-2*00(225)	TRBD1*00(40)	TRBJ1-1*00(190)		430|447|467|0|17||85.0	17|25|36|21|29||40.0	30|40|68|29|39||50.0		NA	NA	NA	NA	NA	NA	NA	NA	NA	NA	TGTGCCAGCAGCTTAGAGGGTAGGGGGCGAGCTTTCTTT	30	NA	NA	NA	NA	NA	NA	NA	CASSLEGRGRAFF	NA	:::::::::0:0:17:21:-5:1:29:29:-10:39:::
BM30	26	1	0.00636943	TGTGCCAGCAGTTTAGGGGGGGCAGAAAACTATGGCTACACCTTC	DCD8AB6@>7=DECADDED=D?BE=BB?BAEEDDBC?8CADBBDE	TRBV12-3*00(190),TRBV12-4*00(190)	TRBD1*00(30)	TRBJ1-2*00(230)		430|446|467|0|16||80.0;430|446|467|0|16||80.0	18|24|36|17|23||30.0	22|40|68|27|45||90.0		NA	NA	NA	NA	NA	NA	NA	NA	NA	NA	TGTGCCAGCAGTTTAGGGGGGGCAGAAAACTATGGCTACACCTTC	21	NA	NA	NA	NA	NA	NA	NA	CASSLGGAENYGYTF	NA	:::::::::0:-1:16:17:-6:0:23:27:-2:45:::
BM30	27	1	0.00636943	TGTGCCAGCGGACCGACAGGGGGAAACACCATATATTTT	BEBEDDEC<EDCE<CDEEDDCDEEEDEEEDEEAEEDEEE	TRBV12-3*00(185),TRBV12-4*00(185)	TRBD1*00(35)	TRBJ1-3*00(230)		430|439|467|0|9||45.0;430|439|467|0|9||45.0	14|21|36|14|21||35.0	24|42|70|21|39||90.0		NA	NA	NA	NA	NA	NA	NA	NA	NA	NA	TGTGCCAGCGGACCGACAGGGGGAAACACCATATATTTT	27	NA	NA	NA	NA	NA	NA	NA	CASGPTGGNTIYF	NA	:::::::::0:-8:9:14:-2:-3:21:21:-4:39:::
BM30	29	1	0.00636943	TGTGCCAGCAGTTTAAGGGGACAGGGAGATCAGCCCCAGCATTTT	DEEEDCEBEEEEBEAEEEDEDEEEEEDED7BDDE<?C7EDDDE9E	TRBV12-3*00(185),TRBV12-4*00(185)	TRBD1*00(45)	TRBJ1-5*00(225)		430|445|467|0|15||75.0;430|445|467|0|15||75.0	12|21|36|17|26||45.0	25|42|70|28|45||85.0		NA	NA	NA	NA	NA	NA	NA	NA	NA	NA	TGTGCCAGCAGTTTAAGGGGACAGGGAGATCAGCCCCAGCATTTT	22	NA	NA	NA	NA	NA	NA	NA	CASSLRGQGDQPQHF	NA	:::::::::0:-2:15:17:0:-3:26:28:-5:45:::
BM30	30	1	0.00636943	TGTGCCAGCAGTTTAATGGGAGGAGGTACCCATTCACCCCTCCACTTT	EECEDBEDEEAE@DEDEEEBEECEEDD<E?ECDEECE?BDECCDDEEE	TRBV12-3*00(170),TRBV12-4*00(170)	TRBD2*00(30)	TRBJ1-6*00(177)		430|445|467|0|15||75.0;430|445|467|0|15||75.0	25|31|48|17|23||30.0	28|45|73|31|48||85.0		NA	NA	NA	NA	NA	NA	NA	NA	NA	NA	TGTGCCAGCAGTTTAATGGGAGGAGGTACCCATTCACCCCTCCACTTT	27	NA	NA	NA	NA	NA	NA	NA	CASSLMGGGTHSPLHF	NA	:::::::::0:-2:15:17:-9:-1:23:31:-8:48:::
BM30	32	1	0.00636943	TGTGCCAGCAGTTCATTCATGGGGGAGGACTACCGAAAACTTTACGAGCAGTACTTC	@?E=EEECECCDDDEEEEBEEEEEDEEE@EDBEDADE@EEEEEEEFDEEEDEADDEE	TRBV12-3*00(115),TRBV12-4*00(115),TRBV6-2*00(115),TRBV6-3*00(115),TRBV6-5*00(115)	TRBD2*00(30)	TRBJ2-7*00(215)		430|443|467|0|13||65.0;430|443|467|0|13||65.0;427|440|464|0|13||65.0;427|440|464|0|13||65.0;427|440|464|0|13||65.0	17|23|48|26|32||30.0	24|39|67|42|57||75.0		NA	NA	NA	NA	NA	NA	NA	NA	NA	NA	TGTGCCAGCAGTTCATTCATGGGGGAGGACTACCGAAAACTTTACGAGCAGTACTTC	28	NA	NA	NA	NA	NA	NA	NA	CASSSFMGEDYRKLYEQYF	NA	:::::::::0:-4:13:26:-1:-9:32:42:-4:57:::
BM30	34	1	0.00636943	TGTGCCAGCAGCCAACGGCACCAAGAGACCCAGTACTTC	DDA>DDE?DEA8DBDE<9CD8DDDAEDD<A@ECED?EDA	TRBV14*00(240)		TRBJ2-5*00(224)		430|445|467|0|15||75.0		20|40|68|19|39||100.0		NA	NA	NA	NA	NA	NA	NA	NA	NA	NA	TGTGCCAGCAGCCAACGGCACCAAGAGACCCAGTACTTC	23	NA	NA	NA	NA	NA	NA	NA	CASSQRHQETQYF	NA	:::::::::0:-2:15:::::19:0:39:::
BM30	35	1	0.00636943	TGTGCCACCAGCAGACCGGCAGATAACACTGAAGCTTTCTTT	EDDABCD=DEEDE<A@?ABEE>BCC@CD@ECEE=CDEECEDE	TRBV15*00(184)		TRBJ1-1*00(230)		427|442|464|0|15||75.0		22|40|68|24|42||90.0		NA	NA	NA	NA	NA	NA	NA	NA	NA	NA	TGTGCCACCAGCAGACCGGCAGATAACACTGAAGCTTTCTTT	27	NA	NA	NA	NA	NA	NA	NA	CATSRPADNTEAFF	NA	:::::::::0:-2:15:::::24:-2:42:::
BM30	36	1	0.00636943	TGTGCCAGCAGCCAGGGACAGGGGTCAAACATTCAGTACTTC	DCD:EEDDEDDEDCECCEBE8;ED:CACEEECEEEDCEEEDE	TRBV16*00(308)	TRBD1*00(50)	TRBJ2-4*00(100)		430|444|467|0|14||70.0	12|22|36|14|24||50.0	26|42|70|26|42||80.0		NA	NA	NA	NA	NA	NA	NA	NA	NA	NA	TGTGCCAGCAGCCAGGGACAGGGGTCAAACATTCAGTACTTC	23	NA	NA	NA	NA	NA	NA	NA	CASSQGQGSNIQYF	NA	:::::::::0:-3:14:14:0:-2:24:26:-6:42:::
BM30	37	1	0.00636943	TGTGCCAGTAGTACAGAAATGGCTGAAGCTTTCTTT	EEEECCEEDEEEEDEEEEEEEDBEBEE7;EEEEEEE	TRBV19*00(224)		TRBJ1-1*00(210)		427|444|464|0|17|ST440C|69.0		26|40|68|22|36||70.0		NA	NA	NA	NA	NA	NA	NA	NA	NA	NA	TGTGCCAGTAGTACAGAAATGGCTGAAGCTTTCTTT	22	NA	NA	NA	NA	NA	NA	NA	CASSTEMAEAFF	NA	:::::::::0:0:17:::::22:-6:36:::
BM30	38	1	0.00636943	TGTGCCAGTAGTCTAACCGGGACTAGCGAGATCGAGCAGTACTTC	BEEECDDDD>A?ECD?DEDBCCEADECDEADCCDBDDCED?EEEE	TRBV19*00(170)	TRBD2*00(60)	TRBJ2-7*00(205)		427|439|464|0|12||60.0	14|26|48|16|28||60.0	26|39|67|32|45||65.0		NA	NA	NA	NA	NA	NA	NA	NA	NA	NA	TGTGCCAGTAGTCTAACCGGGACTAGCGAGATCGAGCAGTACTTC	29	NA	NA	NA	NA	NA	NA	NA	CASSLTGTSEIEQYF	NA	:::::::::0:-5:12:16:2:-6:28:32:-6:45:::
BM30	39	1	0.00636943	TGTGCCAGCAGTGAAGACAGGCCATTCGCGGCTAACTATGGCTACACCTTC	DEEEFFEEEEEFEEEEDCFFEFEEDEEEEEFEEEFEEEEDEEEEEEEEEEE	TRBV2*00(339)	TRBD1*00(25)	TRBJ1-2*00(245)		430|446|467|0|16||80.0	15|20|36|16|21||25.0	19|40|68|30|51||105.0		NA	NA	NA	NA	NA	NA	NA	NA	NA	NA	TGTGCCAGCAGTGAAGACAGGCCATTCGCGGCTAACTATGGCTACACCTTC	34	NA	NA	NA	NA	NA	NA	NA	CASSEDRPFAANYGYTF	NA	:::::::::0:-1:16:16:-3:-4:21:30:1:51:::
BM30	40	1	0.00636943	TGTGCCAGCAGTGAGATGCGCGGACGGGCTGAAAAACTGTTTTTT	:=CBC<6BC@DBEBAC=?EAB??:?DE?DDD:B=BADEDEDE@DE	TRBV2*00(215)		TRBJ1-4*00(210)		430|444|467|0|14||70.0		27|43|71|29|45||80.0		NA	NA	NA	NA	NA	NA	NA	NA	NA	NA	TGTGCCAGCAGTGAGATGCGCGGACGGGCTGAAAAACTGTTTTTT	21	NA	NA	NA	NA	NA	NA	NA	CASSEMRGRAEKLFF	NA	:::::::::0:-3:14:::::29:-7:45:::
BM30	41	1	0.00636943	TGTGCCAGCAGTGGACTTCTGGGCGCGGCGGGAAAACTGTTTTTT	A;;EEEEDEED@EDDBECEEB@CCEEECEEEDEEEEEEDEEEEEE	TRBV2*00(210)	TRBD1*00(30)	TRBJ1-4*00(195)		430|443|467|0|13||65.0	20|26|36|20|26||30.0	30|43|71|32|45||65.0		NA	NA	NA	NA	NA	NA	NA	NA	NA	NA	TGTGCCAGCAGTGGACTTCTGGGCGCGGCGGGAAAACTGTTTTTT	26	NA	NA	NA	NA	NA	NA	NA	CASSGLLGAAGKLFF	NA	:::::::::0:-4:13:20:-8:2:26:32:-10:45:::
BM30	42	1	0.00636943	TGCAGTGCTATTATACAGGAAGTAACAGATACGCAGTATTTT	E<?E;DEDAB>EECEEDE=EDEEE9@EDDEBEEDEDEEDDBD	TRBV20-1*00(215)	TRBD1*00(25)	TRBJ2-3*00(162)		421|431|455|0|10||50.0	15|20|36|14|19||25.0	23|41|69|24|42||90.0		NA	NA	NA	NA	NA	NA	NA	NA	NA	NA	TGCAGTGCTATTATACAGGAAGTAACAGATACGCAGTATTTT	24	NA	NA	NA	NA	NA	NA	NA	CSAIIQEVTDTQYF	NA	:::::::::0:-4:10:14:-3:-4:19:24:-3:42:::
BM30	44	1	0.00636943	TGTGCCAGCAGTACCGGGACTTCAAGCTCCTACAATGAGCAGTTCTTC	EEDDEBEEFEEEEEEEEDEECC?EE@EDEEEDEEDEEBEEDEEDEEEE	TRBV27*00(135)	TRBD2*00(40),TRBD1*00(35)	TRBJ2-1*00(260)		427|439|464|0|12||60.0	14|22|48|13|21||40.0;10|17|36|13|20||35.0	18|42|70|24|48||120.0		NA	NA	NA	NA	NA	NA	NA	NA	NA	NA	TGTGCCAGCAGTACCGGGACTTCAAGCTCCTACAATGAGCAGTTCTTC	30	NA	NA	NA	NA	NA	NA	NA	CASSTGTSSSYNEQFF	NA	:::::::::0:-5:12:13:2:-10:21:24:2:48:::
BM30	45	1	0.00636943	TGTGCCAGTCAAACGGCTAGCACAGATACGCAGTATTTT	?:D?EDEEEBC7>CEDE9CEE=EDE>C9EBDEBE>CEDE	TRBV27*00(165)		TRBJ2-3*00(260)		427|435|464|0|8||40.0		17|41|69|15|39||120.0		NA	NA	NA	NA	NA	NA	NA	NA	NA	NA	TGTGCCAGTCAAACGGCTAGCACAGATACGCAGTATTTT	22	NA	NA	NA	NA	NA	NA	NA	CASQTASTDTQYF	NA	:::::::::0:-9:8:::::15:3:39:::
BM30	46	1	0.00636943	TGTGCCAGCAGTAAGCGGGAGGGTTGGACAGATACGCAGTATTTT	EEE=DAEEEDEDEDCEDDBCEEBCEEECEEEBE@EEEEEECEDDD	TRBV27*00(139),TRBV6-1*00(127),TRBV6-5*00(123),TRBV6-6*00(123)	TRBD2*00(50)	TRBJ2-3*00(230)		427|439|464|0|12||60.0;427|445|464|0|17|DG439|64.0;427|439|464|0|12||60.0;427|439|464|0|12||60.0	22|32|48|13|23||50.0	23|41|69|27|45||90.0		NA	NA	NA	NA	NA	NA	NA	NA	NA	NA	TGTGCCAGCAGTAAGCGGGAGGGTTGGACAGATACGCAGTATTTT	28	NA	NA	NA	NA	NA	NA	NA	CASSKREGWTDTQYF	NA	:::::::::0:-5:12:13:-6:0:23:27:-3:45:::
BM30	47	1	0.00636943	TGTGCCAGCAGTTCCAGCCGTGAGCAGTACTTC	CEEDDFBEE?FAEDEBEEDCEE=EEDEEDEEED	TRBV27*00(258)		TRBJ2-7*00(64)		427|440|464|0|13||65.0		27|39|67|21|33||60.0		NA	NA	NA	NA	NA	NA	NA	NA	NA	NA	TGTGCCAGCAGTTCCAGCCGTGAGCAGTACTTC	28	NA	NA	NA	NA	NA	NA	NA	CASSSSREQYF	NA	:::::::::0:-4:13:::::21:-7:33:::
BM30	48	1	0.00636943	TGTGCCAGCAAGAGGGCCAATCAGCCCCAGCATTTT	CEDE<BADE@DEEBDD?DE<;=A@BC<BCCE:E9CE	TRBV28*00(205)	TRBD2*00(30)	TRBJ1-5*00(235)		427|437|464|0|10||50.0	27|33|48|11|17||30.0	23|42|70|17|36||95.0		NA	NA	NA	NA	NA	NA	NA	NA	NA	NA	TGTGCCAGCAAGAGGGCCAATCAGCCCCAGCATTTT	24	NA	NA	NA	NA	NA	NA	NA	CASKRANQPQHF	NA	:::::::::0:-7:10:11:-11:1:17:17:-3:36:::
BM30	49	1	0.00636943	TGTGCCAGCAGTCTCGACAGGGTTCTATTTTCACCCCTCCACTTT	DEEECEE;DAEEEAED@ECBDEEDEECEDDCD@D9EEEDB=ACCE	TRBV28*00(170)	TRBD1*00(35)	TRBJ1-6*00(204)		427|439|464|0|12||60.0	14|21|36|15|22||35.0	29|45|73|29|45||80.0		NA	NA	NA	NA	NA	NA	NA	NA	NA	NA	TGTGCCAGCAGTCTCGACAGGGTTCTATTTTCACCCCTCCACTTT	24	NA	NA	NA	NA	NA	NA	NA	CASSLDRVLFSPLHF	NA	:::::::::0:-5:12:15:-2:-3:22:29:-9:45:::
BM30	52	1	0.00636943	TGCAGCGTTGATCGGGCGGGAGCCTCCTACAATGAGCAGTTCTTC	E6EEEECEEEEEE=7E<EE=>B8CA<CEEDBEE>EEBEE?DDDDD	TRBV29-1*00(278)	TRBD2*00(35)	TRBJ2-1*00(130)		421|432|455|0|11||55.0	23|30|48|15|22||35.0	20|42|70|23|45||110.0		NA	NA	NA	NA	NA	NA	NA	NA	NA	NA	TGCAGCGTTGATCGGGCGGGAGCCTCCTACAATGAGCAGTTCTTC	21	NA	NA	NA	NA	NA	NA	NA	CSVDRAGASYNEQFF	NA	:::::::::0:-3:11:15:-7:-2:22:23:0:45:::
BM30	53	1	0.00636943	TGTGCCAGCAGTGAGGGTCTCGGAGGCTCGGAAACTGAAGCTTTCTTT	DEEEEEEA9EEB9EBEDAE7DE>EAED<DEEED6EB9EE@DEEDDCEE	TRBV6-1*00(165),TRBV6-5*00(155),TRBV6-6*00(155),TRBV10-3*00(154)	TRBD2*00(25)	TRBJ1-1*00(215)		427|441|464|0|14||70.0;427|439|464|0|12||60.0;427|439|464|0|12||60.0;427|442|464|0|15|ST434G|59.0	26|31|48|21|26||25.0	25|40|68|33|48||75.0		NA	NA	NA	NA	NA	NA	NA	NA	NA	NA	TGTGCCAGCAGTGAGGGTCTCGGAGGCTCGGAAACTGAAGCTTTCTTT	21	NA	NA	NA	NA	NA	NA	NA	CASSEGLGGSETEAFF	NA	:::::::::0:-3:14:21:-10:-1:26:33:-5:48:::
BM30	54	1	0.00636943	TGTGCCAGCAGTGAAGGGGGAGGGAACTATGGCTACACCTTC	EEEBAEDDDECEEACDEDEE@C8AC?DB@DEEDE=C>ADBDE	TRBV6-1*00(205),TRBV6-5*00(185),TRBV6-6*00(185)	TRBD2*00(35)	TRBJ1-2*00(230)		427|443|464|0|16||80.0;427|439|464|0|12||60.0;427|439|464|0|12||60.0	25|32|48|17|24||35.0	22|40|68|24|42||90.0		NA	NA	NA	NA	NA	NA	NA	NA	NA	NA	TGTGCCAGCAGTGAAGGGGGAGGGAACTATGGCTACACCTTC	23	NA	NA	NA	NA	NA	NA	NA	CASSEGGGNYGYTF	NA	:::::::::0:-1:16:17:-9:0:24:24:-2:42:::
BM30	55	1	0.00636943	TGTGCCAGCAGTGAATCAGATACGCAGTATTTT	EEE@DEDEEDED>EBDEE@CD<BBDD@D>E?CE	TRBV6-1*00(225),TRBV6-5*00(210),TRBV6-6*00(210)		TRBJ2-3*00(225)		427|442|464|0|15||75.0;427|439|464|0|12||60.0;427|439|464|0|12||60.0		24|41|69|16|33||85.0		NA	NA	NA	NA	NA	NA	NA	NA	NA	NA	TGTGCCAGCAGTGAATCAGATACGCAGTATTTT	27	NA	NA	NA	NA	NA	NA	NA	CASSESDTQYF	NA	:::::::::0:-2:15:::::16:-4:33:::
BM30	56	1	0.00636943	TGTGCCAGCAGTGAAGGACTAGGAACAGATACGCAGTATTTT	EB;A8AE<DEE<CCEEAAE=DCEDBAEDECEEBECBE@CDCD	TRBV6-1*00(190),TRBV6-5*00(170),TRBV6-6*00(170)	TRBD2*00(30)	TRBJ2-3*00(214)		427|443|464|0|16||80.0;427|439|464|0|12||60.0;427|439|464|0|12||60.0	18|24|48|16|22||30.0	23|41|69|24|42||90.0		NA	NA	NA	NA	NA	NA	NA	NA	NA	NA	TGTGCCAGCAGTGAAGGACTAGGAACAGATACGCAGTATTTT	23	NA	NA	NA	NA	NA	NA	NA	CASSEGLGTDTQYF	NA	:::::::::0:-1:16:16:-2:-8:22:24:-3:42:::
BM30	57	1	0.00636943	TGTGCCAGTAAGGATCAGTTT	DEEE>EEEDEEEDDEEEEEEE	TRBV6-2*00(206),TRBV6-3*00(206)		TRBJ1-6*00(139)		427|435|464|0|8||40.0;427|435|464|0|8||40.0		42|45|73|18|21||15.0		NA	NA	NA	NA	NA	NA	NA	NA	NA	NA	TGTGCCAGTAAGGATCAGTTT	29	NA	NA	NA	NA	NA	NA	NA	CASKDQF	NA	:::::::::0:-9:8:::::18:-22:21:::
BM30	58	1	0.00636943	TGTGCCAGCAGTTACTGGAGCGGGAACACAGATACGCAGTATTTT	EEEDA>D?E;E7E;DE?EBE@CBDE;DABE=C8EEDBDBE@D>CD	TRBV6-2*00(179),TRBV6-3*00(179),TRBV6-5*00(163),TRBV6-6*00(163)	TRBD1*00(25),TRBD2*00(25)	TRBJ2-3*00(235)		427|447|464|0|20|SC443G|84.0;427|447|464|0|20|SC443G|84.0;427|447|464|0|20|SC443G|84.0;427|447|464|0|20|SC443G|84.0	11|16|36|20|25||25.0;15|20|48|20|25||25.0	22|41|69|26|45||95.0		NA	NA	NA	NA	NA	NA	NA	NA	NA	NA	TGTGCCAGCAGTTACTGGAGCGGGAACACAGATACGCAGTATTTT	22	NA	NA	NA	NA	NA	NA	NA	CASSYWSGNTDTQYF	NA	:::::::::0:3:20:20:1:-8:25:26:-2:45:::
BM30	59	1	0.00636943	TGTGCCAGCAGTTACTTCAATTACGAGCAGTACTTC	EEEDEAEBEEDEDAEEEE@AEE@D@EEEEEEEEDCE	TRBV6-2*00(235),TRBV6-3*00(235),TRBV6-5*00(219),TRBV6-6*00(219)		TRBJ2-7*00(215)		427|443|464|0|16||80.0;427|443|464|0|16||80.0;427|443|464|0|16||80.0;427|443|464|0|16||80.0		24|39|67|21|36||75.0		NA	NA	NA	NA	NA	NA	NA	NA	NA	NA	TGTGCCAGCAGTTACTTCAATTACGAGCAGTACTTC	31	NA	NA	NA	NA	NA	NA	NA	CASSYFNYEQYF	NA	:::::::::0:-1:16:::::21:-4:36:::
BM30	61	1	0.00636943	TGTGCCAGCAGCCCTAGATGGGACACTGAAGCTTTCTTT	D=E@DBCEDD>DDEDCEC?EBDBDBEECDCCEDDDEDCD	TRBV6-1*00(195),TRBV6-5*00(195),TRBV6-6*00(195),TRBV6-2*00(179),TRBV6-3*00(179)		TRBJ1-1*00(225)		427|438|464|0|11||55.0;427|438|464|0|11||55.0;427|438|464|0|11||55.0;427|438|464|0|11||55.0;427|438|464|0|11||55.0		23|40|68|22|39||85.0		NA	NA	NA	NA	NA	NA	NA	NA	NA	NA	TGTGCCAGCAGCCCTAGATGGGACACTGAAGCTTTCTTT	28	NA	NA	NA	NA	NA	NA	NA	CASSPRWDTEAFF	NA	:::::::::0:-6:11:::::22:-3:39:::
BM30	62	1	0.00636943	TGTGCCAGCAGTCCCAACGGGCCCTATGGCTACACCTTC	CEEADDE>EECADBDE>EDEABC96E>DDEA;DCCCDBE	TRBV6-1*00(200),TRBV6-5*00(200),TRBV6-6*00(200),TRBV6-2*00(184),TRBV6-3*00(184)	TRBD2*00(25)	TRBJ1-2*00(220)		427|439|464|0|12||60.0;427|439|464|0|12||60.0;427|439|464|0|12||60.0;427|439|464|0|12||60.0;427|439|464|0|12||60.0	29|34|48|18|23||25.0	24|40|68|23|39||80.0		NA	NA	NA	NA	NA	NA	NA	NA	NA	NA	TGTGCCAGCAGTCCCAACGGGCCCTATGGCTACACCTTC	21	NA	NA	NA	NA	NA	NA	NA	CASSPNGPYGYTF	NA	:::::::::0:-5:12:18:-13:2:23:23:-4:39:::
BM30	63	1	0.00636943	TGTGCCAGCAGTTACTCAGAGGGGAGCCAGCCCCAGCATTTT	?DD<EC8?DD>DCB??8BDBD6?BA@DDA<B@?E:?EAC9C=	TRBV6-5*00(210),TRBV6-6*00(210),TRBV6-2*00(194),TRBV6-3*00(194),TRBV6-8*00(194)	TRBD1*00(25),TRBD2*00(25)	TRBJ1-5*00(215)		427|444|464|0|17||85.0;427|444|464|0|17||85.0;427|444|464|0|17||85.0;427|444|464|0|17||85.0;424|441|461|0|17||85.0	17|22|36|19|24||25.0;25|30|48|21|26||25.0	27|42|70|27|42||75.0		NA	NA	NA	NA	NA	NA	NA	NA	NA	NA	TGTGCCAGCAGTTACTCAGAGGGGAGCCAGCCCCAGCATTTT	21	NA	NA	NA	NA	NA	NA	NA	CASSYSEGSQPQHF	NA	:::::::::0:0:17:19:-5:-2:24:27:-7:42:::
BM30	64	1	0.00636943	TGTGCCAGCACCAGGTTGGTAGGGACAGGGGCCCGGGCTTTCTTT	EDEDEDEDEEDEEDEEBDDBEEDE?EEEDEE>EEEEEEDE@EEDD	TRBV6-1*00(227),TRBV6-9*00(227),TRBV6-6*00(211)	TRBD1*00(50)	TRBJ1-1*00(95)		427|437|464|0|10||50.0;427|437|464|0|10||50.0;427|437|464|0|10||50.0	12|22|36|21|31||50.0	31|40|68|36|45||45.0		NA	NA	NA	NA	NA	NA	NA	NA	NA	NA	TGTGCCAGCACCAGGTTGGTAGGGACAGGGGCCCGGGCTTTCTTT	29	NA	NA	NA	NA	NA	NA	NA	CASTRLVGTGARAFF	NA	:::::::::0:-7:10:21:0:-2:31:36:-11:45:::
BM30	65	1	0.00636943	TGTGCCAGCGGCAGACAGATGAGTAATGAAAAACTGTTTTTT	DEDBE6BDCECE<EDBDE@EEECE=BCEBDE?>:EEDD=ADC	TRBV6-1*00(157),TRBV6-5*00(157),TRBV6-9*00(157),TRBV6-2*00(141),TRBV6-3*00(141)	TRBD1*00(25)	TRBJ1-4*00(225)		427|436|464|0|9||45.0;427|436|464|0|9||45.0;427|436|464|0|9||45.0;427|436|464|0|9||45.0;427|436|464|0|9||45.0	14|19|36|13|18||25.0	24|43|71|23|42||95.0		NA	NA	NA	NA	NA	NA	NA	NA	NA	NA	TGTGCCAGCGGCAGACAGATGAGTAATGAAAAACTGTTTTTT	21	NA	NA	NA	NA	NA	NA	NA	CASGRQMSNEKLFF	NA	:::::::::0:-8:9:13:-2:-5:18:23:-4:42:::
BM30	66	1	0.00636943	TGTGCCAGCAGCGCCCAGAATTCACCCCTCCACTTT	EEBDAECCEE=EEEDEE:ADDEE;BEDEEDECEDEE	TRBV7-6*00(215),TRBV7-7*00(199)		TRBJ1-6*00(214)		430|442|467|0|12||60.0;430|442|467|0|12||60.0		27|45|73|18|36||90.0		NA	NA	NA	NA	NA	NA	NA	NA	NA	NA	TGTGCCAGCAGCGCCCAGAATTCACCCCTCCACTTT	25	NA	NA	NA	NA	NA	NA	NA	CASSAQNSPLHF	NA	:::::::::0:-5:12:::::18:-7:36:::
BM30	68	1	0.00636943	TGTGCCAGCAGCTATGGACAAACTAATGAAAAACTGTTTTTT	EEC;DEDDECDB=@?EEBEECD?:DBDCDECEDBEDEDBD@D	TRBV7-9*00(225)	TRBD1*00(25)	TRBJ1-4*00(240)		430|443|467|0|13||65.0	13|18|36|15|20||25.0	21|43|71|20|42||110.0		NA	NA	NA	NA	NA	NA	NA	NA	NA	NA	TGTGCCAGCAGCTATGGACAAACTAATGAAAAACTGTTTTTT	25	NA	NA	NA	NA	NA	NA	NA	CASSYGQTNEKLFF	NA	:::::::::0:-4:13:15:-1:-6:20:20:-1:42:::
BM31	135	20	0.0524934	TGTGCCAGCAGCTTAGGCGAGGTAACTGAAGCTTTCTTT	FFFFFFFEFFFFFFFFFFFFFFEFEFEFFFFFFFFFFFF	TRBV11-1*00(433),TRBV11-3*00(417),TRBV11-2*00(385)		TRBJ1-1*00(135)		430|446|467|0|16||80.0;430|446|467|0|16||80.0;430|446|467|0|16||80.0		25|40|68|24|39||75.0		NA	NA	NA	NA	NA	NA	NA	NA	NA	NA	TGTGCCAGCAGCTTAGGCGAGGTAACTGAAGCTTTCTTT	36	NA	NA	NA	NA	NA	NA	NA	CASSLGEVTEAFF	NA	:::::::::0:-1:16:::::24:-5:39:::
BM31	165	15	0.0393701	TGTGCCAGCAGCTTCTCTACTTACGAGCAGTACTTC	FFFFFFEFFEFFFFFFFFEFFEEFFFFFFFEFFEFF	TRBV11-1*00(423),TRBV11-3*00(407),TRBV11-2*00(375)		TRBJ2-7*00(135)		430|444|467|0|14||70.0;430|444|467|0|14||70.0;430|444|467|0|14||70.0		24|39|67|21|36||75.0		NA	NA	NA	NA	NA	NA	NA	NA	NA	NA	TGTGCCAGCAGCTTCTCTACTTACGAGCAGTACTTC	36	NA	NA	NA	NA	NA	NA	NA	CASSFSTYEQYF	NA	:::::::::0:-3:14:::::21:-4:36:::
BM31	166	15	0.0393701	TGTGCCAGCAGCTTCAGGGTTTATAATTCACCCCTCCACTTT	FFEFFEFFFFFFFFFFFFFFFFFFEFEFFEFFFFEEFFFFFF	TRBV7-2*00(335.9),TRBV7-8*00(325.9)	TRBD1*00(25)	TRBJ1-6*00(245)		430|444|467|0|14||70.0;430|444|467|0|14||70.0	16|21|36|14|19||25.0	24|45|73|21|42||105.0		NA	NA	NA	NA	NA	NA	NA	NA	NA	NA	TGTGCCAGCAGCTTCAGGGTTTATAATTCACCCCTCCACTTT	36	NA	NA	NA	NA	NA	NA	NA	CASSFRVYNSPLHF	NA	:::::::::0:-3:14:14:-4:-3:19:21:-4:42:::
BM31	185	14	0.0367454	TGTGCCAGCAGTTTATTTCAGGGTGCAGATACGCAGTATTTT	FFFFEFFFFFFFFFEFFFFFFFFFFEFFFEEFFFFFFEEFFF	TRBV28*00(281.7)	TRBD1*00(25)	TRBJ2-3*00(225)		427|443|464|0|16||80.0	16|21|36|18|23||25.0	24|41|69|25|42||85.0		NA	NA	NA	NA	NA	NA	NA	NA	NA	NA	TGTGCCAGCAGTTTATTTCAGGGTGCAGATACGCAGTATTTT	36	NA	NA	NA	NA	NA	NA	NA	CASSLFQGADTQYF	NA	:::::::::0:-1:16:18:-4:-3:23:25:-4:42:::
BM31	215	12	0.0314961	TGTGCCAGCAGTTTACAGGGGAGGTACACTGAAGCTTTCTTT	FEFFFFFFEFFEEFEFFFFFEEFFFFEFFFFFFFFEFFFFFF	TRBV12-3*00(271.7),TRBV12-4*00(271.7)	TRBD1*00(30),TRBD2*00(30)	TRBJ1-1*00(225)		430|445|467|0|15||75.0;430|445|467|0|15||75.0	16|22|36|15|21||30.0;25|31|48|18|24||30.0	23|40|68|25|42||85.0		NA	NA	NA	NA	NA	NA	NA	NA	NA	NA	TGTGCCAGCAGTTTACAGGGGAGGTACACTGAAGCTTTCTTT	36	NA	NA	NA	NA	NA	NA	NA	CASSLQGRYTEAFF	NA	:::::::::0:-2:15:15:-4:-2:21:25:-3:42:::
BM31	216	12	0.0314961	TGTGCCAGCAGAATGGGACTAGCGGGGGCCAGGATGTGGGATGAGCAGTTCTTC	FEFFFFFFFFFFFFFFFFFFEFFFFFFFFFEFFFEFFFFFFFFFFFFFFFFFFF	TRBV12-3*00(248),TRBV12-4*00(248)	TRBD2*00(60)	TRBJ2-1*00(210)		430|441|467|0|11||55.0;430|441|467|0|11||55.0	16|28|48|14|26||60.0	28|42|70|40|54||70.0		NA	NA	NA	NA	NA	NA	NA	NA	NA	NA	TGTGCCAGCAGAATGGGACTAGCGGGGGCCAGGATGTGGGATGAGCAGTTCTTC	36	NA	NA	NA	NA	NA	NA	NA	CASRMGLAGARMWDEQFF	NA	:::::::::0:-6:11:14:0:-4:26:40:-8:54:::
BM31	266	10	0.0262467	TGTGCCAGCAGGGCGATGGGCCCCGAAGGGGATACGCAGTATTTT	EFEFFFFFFEFFFEFEEFFFFFFFEFFFFEFFEEFFFFFEEEFFF	TRBV2*00(312.4)	TRBD2*00(30)	TRBJ2-3*00(199)		430|441|467|0|11||55.0	29|35|48|17|23||30.0	26|41|69|30|45||75.0		NA	NA	NA	NA	NA	NA	NA	NA	NA	NA	TGTGCCAGCAGGGCGATGGGCCCCGAAGGGGATACGCAGTATTTT	36	NA	NA	NA	NA	NA	NA	NA	CASRAMGPEGDTQYF	NA	:::::::::0:-6:11:17:-13:3:23:30:-6:45:::
BM31	268	10	0.0262467	TGTGCCAGCGGAGCGCCTCAAACAGCCGATGGCTACACCTTC	EEFFFFFFEFEEFFFFFEFFEFFFFFFEFFFFFFEFFFFFFE	TRBV6-2*00(222),TRBV6-3*00(222)	TRBD1*00(25)	TRBJ1-2*00(210)		427|436|464|0|9||45.0;427|436|464|0|9||45.0	22|27|36|12|17||25.0	26|40|68|28|42||70.0		NA	NA	NA	NA	NA	NA	NA	NA	NA	NA	TGTGCCAGCGGAGCGCCTCAAACAGCCGATGGCTACACCTTC	36	NA	NA	NA	NA	NA	NA	NA	CASGAPQTADGYTF	NA	:::::::::0:-8:9:12:-10:3:17:28:-6:42:::
BM31	269	10	0.0262467	TATGCCAGCACTTACAAGGGGAGCACAGATACGCAGTATTTT	FEFFEFFFFFFFFEFFFFEFFFEFEFFEEEEFFFFFEFEFFF	TRBV6-2*00(234.4),TRBV6-3*00(234.4)	TRBD1*00(25)	TRBJ2-3*00(245)		427|442|464|0|15|SG428ASG437C|43.0;427|442|464|0|15|SG428ASG437C|43.0	17|22|36|16|21||25.0	20|41|69|21|42||105.0		NA	NA	NA	NA	NA	NA	NA	NA	NA	NA	TATGCCAGCACTTACAAGGGGAGCACAGATACGCAGTATTTT	36	NA	NA	NA	NA	NA	NA	NA	YASTYKGSTDTQYF	NA	:::::::::0:-2:15:16:-5:-2:21:21:0:42:::
BM31	309	9	0.023622	TGCGCCAGCATTGACAGGATAGACTATGGCTACACCTTC	FEFEFEFFEEFFFFFFFFEEFFEFFFFFFFEEFFFEFFF	TRBV10-1*00(230),TRBV10-2*00(214)		TRBJ1-2*00(225)		427|441|464|0|14|SG437T|54.0;427|441|464|0|14|SG437T|54.0		23|40|68|22|39||85.0		NA	NA	NA	NA	NA	NA	NA	NA	NA	NA	TGCGCCAGCATTGACAGGATAGACTATGGCTACACCTTC	36	NA	NA	NA	NA	NA	NA	NA	CASIDRIDYGYTF	NA	:::::::::0:-3:14:::::22:-3:39:::
BM31	310	9	0.023622	TGTGCCAGCAGCGCCCCCCAAGAGACCCAGTACCTC	FEEEEEEEEEEEFFEEFFFFEFEEEEEFFEEEFEEE	TRBV11-2*00(413),TRBV11-3*00(381),TRBV11-1*00(365)	TRBD1*00(25)	TRBJ2-5*00(219)		430|442|467|0|12||60.0;430|442|467|0|12||60.0;430|442|467|0|12||60.0	0|5|36|12|17||25.0	21|40|68|17|36|ST37C|79.0		NA	NA	NA	NA	NA	NA	NA	NA	NA	NA	TGTGCCAGCAGCGCCCCCCAAGAGACCCAGTACCTC	36	NA	NA	NA	NA	NA	NA	NA	CASSAPQETQYL	NA	:::::::::0:-5:12:12:12:-19:17:17:-1:36:::
BM31	311	9	0.023622	TGTGCCAGCAGTGCCGACGGCCCAGGTCTGAGTTACGAGCAGTACTTC	EEEEFEEEFFEEEEEEEEFFFFFEFFEFFFEFEEEEEEFFFFEEEEEE	TRBV2*00(320.4)	TRBD2*00(25)	TRBJ2-7*00(215)		430|443|467|0|13||65.0	30|35|48|18|23||25.0	24|39|67|33|48||75.0		NA	NA	NA	NA	NA	NA	NA	NA	NA	NA	TGTGCCAGCAGTGCCGACGGCCCAGGTCTGAGTTACGAGCAGTACTTC	36	NA	NA	NA	NA	NA	NA	NA	CASSADGPGLSYEQYF	NA	:::::::::0:-4:13:18:-14:3:23:33:-4:48:::
BM31	312	9	0.023622	TGTGCCAGCAGTCCCATCGACACCGGGGAGCTGTTTTTT	FFEEFFFFFFEEFFFEEFFEFFFFFFFFFEFFFFFEFFF	TRBV27*00(253)		TRBJ2-2*00(224)		427|439|464|0|12||60.0		23|43|71|19|39||100.0		NA	NA	NA	NA	NA	NA	NA	NA	NA	NA	TGTGCCAGCAGTCCCATCGACACCGGGGAGCTGTTTTTT	36	NA	NA	NA	NA	NA	NA	NA	CASSPIDTGELFF	NA	:::::::::0:-5:12:::::19:-3:39:::
BM31	313	9	0.023622	TGTGCCAGCAGCCAGGGTCCAGGGTCAGCCGATACGCAGTATTTT	EFEFEFEEEEEEFEFEEEFEEFEEEFEEEFEEEEEFFFFFEEFEF	TRBV4-2*00(433),TRBV4-3*00(417)	TRBD1*00(28)	TRBJ2-3*00(215)		427|441|464|0|14||70.0;427|441|464|0|14|SC429T|54.0	7|19|36|16|28|SC11ASA15T|28.0	26|41|69|30|45||75.0		NA	NA	NA	NA	NA	NA	NA	NA	NA	NA	TGTGCCAGCAGCCAGGGTCCAGGGTCAGCCGATACGCAGTATTTT	36	NA	NA	NA	NA	NA	NA	NA	CASSQGPGSADTQYF	NA	:::::::::0:-3:14:16:5:-5:28:30:-6:45:::
BM31	314	9	0.023622	TGTGCCAGCCATTCGGACAGGGAGGACTATGGCTACACCTTC	FEFFEEEFFFFFFEEFEFFFFEEFFFEEEFEFFEEFEFFFEE	TRBV6-1*00(220.2),TRBV6-9*00(220.2),TRBV6-6*00(204.2)	TRBD1*00(40)	TRBJ1-2*00(225)		427|436|464|0|9||45.0;427|436|464|0|9||45.0;427|436|464|0|9||45.0	13|21|36|14|22||40.0	23|40|68|25|42||85.0		NA	NA	NA	NA	NA	NA	NA	NA	NA	NA	TGTGCCAGCCATTCGGACAGGGAGGACTATGGCTACACCTTC	36	NA	NA	NA	NA	NA	NA	NA	CASHSDREDYGYTF	NA	:::::::::0:-8:9:14:-1:-3:22:25:-3:42:::
BM31	315	9	0.023622	TGTGCCAGCAGCAACGTTCAGGGGGCCACTGAAGCTTTCTTT	EEEEFEEFEFFEFEEFEEEEFFFFFFFFEFEFFEFFFEEFFE	TRBV7-2*00(343),TRBV7-8*00(333)	TRBD1*00(40)	TRBJ1-1*00(220)		430|442|467|0|12||60.0;430|442|467|0|12||60.0	16|24|36|18|26||40.0	24|40|68|26|42||80.0		NA	NA	NA	NA	NA	NA	NA	NA	NA	NA	TGTGCCAGCAGCAACGTTCAGGGGGCCACTGAAGCTTTCTTT	36	NA	NA	NA	NA	NA	NA	NA	CASSNVQGATEAFF	NA	:::::::::0:-5:12:18:-4:0:26:26:-4:42:::
BM31	359	8	0.0209974	TGTGCCAGCAGCTTAGACGCCGGCACAGTTTCGCATTATGGCTACACCTTC	FEEEEEEEFEEEEEFEEFEEFFFEEFEFFFEEFFEEEFEFFFEEEFFEEEE	TRBV11-2*00(438),TRBV11-3*00(406),TRBV11-1*00(385)	TRBD1*00(29)	TRBJ1-2*00(215)		430|447|467|0|17||85.0;430|447|467|0|17||85.0;430|446|467|0|16||80.0	10|19|36|19|28|SG14C|29.0	25|40|68|36|51||75.0		NA	NA	NA	NA	NA	NA	NA	NA	NA	NA	TGTGCCAGCAGCTTAGACGCCGGCACAGTTTCGCATTATGGCTACACCTTC	36	NA	NA	NA	NA	NA	NA	NA	CASSLDAGTVSHYGYTF	NA	:::::::::0:0:17:19:2:-5:28:36:-5:51:::
BM31	361	8	0.0209974	TGTGCCAGTAGTGCCACAGGGAGGGGTACTGAAGCTTTCTTT	EEEFFEFEEEEFFEFEFEFFFEFFFFEEFFEEFEEFEFEFFF	TRBV19*00(324)	TRBD2*00(35),TRBD1*00(30)	TRBJ1-1*00(135)		427|439|464|0|12||60.0	25|32|48|18|25||35.0;15|21|36|15|21||30.0	25|40|68|27|42||75.0		NA	NA	NA	NA	NA	NA	NA	NA	NA	NA	TGTGCCAGTAGTGCCACAGGGAGGGGTACTGAAGCTTTCTTT	36	NA	NA	NA	NA	NA	NA	NA	CASSATGRGTEAFF	NA	:::::::::0:-5:12:18:-9:0:25:27:-5:42:::
BM31	362	8	0.0209974	TGCAGTGCTAGAGATGAGGTCGAGGGGAATGGCTACACCTTC	EFEFFEFFEEFEFEEFFFFFEFFFFFEFEEEFFFEEFFEEFF	TRBV20-1*00(413)	TRBD1*00(25),TRBD2*00(25)	TRBJ1-2*00(210)		421|436|455|0|15||75.0	17|22|36|22|27||25.0;27|32|48|21|26||25.0	26|40|68|28|42||70.0		NA	NA	NA	NA	NA	NA	NA	NA	NA	NA	TGCAGTGCTAGAGATGAGGTCGAGGGGAATGGCTACACCTTC	36	NA	NA	NA	NA	NA	NA	NA	CSARDEVEGNGYTF	NA	:::::::::0:1:15:22:-5:-2:27:28:-6:42:::
BM31	363	8	0.0209974	TGCAGTGCTAGGGACTCGACAGGCAACACCGGGGAGCTGTTTTTT	EEFEFEFEFEFFFEFFFEEEFFFFEEEEEEFFEEFFEEEEEFEEE	TRBV20-1*00(393)	TRBD1*00(30)	TRBJ2-2*00(245)		421|432|455|0|11||55.0	14|20|36|17|23||30.0	22|43|71|24|45||105.0		NA	NA	NA	NA	NA	NA	NA	NA	NA	NA	TGCAGTGCTAGGGACTCGACAGGCAACACCGGGGAGCTGTTTTTT	36	NA	NA	NA	NA	NA	NA	NA	CSARDSTGNTGELFF	NA	:::::::::0:-3:11:17:-2:-4:23:24:-2:45:::
BM31	364	8	0.0209974	TGTGCCTGGGGTGTCGTCCTGACTTTC	EEFEEEEEFFEEEEEEEEEEEEEEEEE	TRBV30*00(566)		TRBJ2-6*00(205)		421|435|455|0|14|SA430G|54.0		32|45|73|14|27||65.0		NA	NA	NA	NA	NA	NA	NA	NA	NA	NA	TGTGCCTGGGGTGTCGTCCTGACTTTC	36	NA	NA	NA	NA	NA	NA	NA	CAWGVVLTF	NA	:::::::::0:0:14:::::14:-12:27:::
BM31	421	7	0.0183727	TGTGCTTGCCGTGAGGGCGGAGGTGGCTACACCTTC	FEFEFEFEFEFEFEFFFEFFFFFEFFFEEFEFFEFF	TRBV19*00(289)	TRBD2*00(30)	TRBJ1-2*00(205)		427|432|464|0|5||25.0	27|33|48|12|18||30.0	27|40|68|23|36||65.0		NA	NA	NA	NA	NA	NA	NA	NA	NA	NA	TGTGCTTGCCGTGAGGGCGGAGGTGGCTACACCTTC	36	NA	NA	NA	NA	NA	NA	NA	CACREGGGGYTF	NA	:::::::::0:-12:5:12:-11:1:18:23:-7:36:::
BM31	422	7	0.0183727	TGCAGTCCCCGCCAGGACAGGGGGCGAGATAGCTATGGCTACACCTTC	EEEEEEFFFEEEFEFEEEEFEFFEEFEFFEFEEEEFEFEFEEEEEEFE	TRBV20-1*00(368)	TRBD1*00(60)	TRBJ1-2*00(220)		421|427|455|0|6||30.0	13|25|36|14|26||60.0	24|40|68|32|48||80.0		NA	NA	NA	NA	NA	NA	NA	NA	NA	NA	TGCAGTCCCCGCCAGGACAGGGGGCGAGATAGCTATGGCTACACCTTC	36	NA	NA	NA	NA	NA	NA	NA	CSPRQDRGRDSYGYTF	NA	:::::::::0:-8:6:14:-1:1:26:32:-4:48:::
BM31	423	7	0.0183727	TGTGCCAGCCATAGTACTTCCGGGACGGAGTTGGAGCCCCAGCATTTT	FFEFFFEFEFEEFFEEFFFFFFFFEEFEEFEFEFEFFFFFFEFEFFFF	TRBV6-2*00(238),TRBV6-3*00(238)	TRBD1*00(35),TRBD2*00(35)	TRBJ1-5*00(210)		427|436|464|0|9||45.0;427|436|464|0|9||45.0	10|17|36|19|26||35.0;14|21|48|19|26||35.0	28|42|70|34|48||70.0		NA	NA	NA	NA	NA	NA	NA	NA	NA	NA	TGTGCCAGCCATAGTACTTCCGGGACGGAGTTGGAGCCCCAGCATTTT	36	NA	NA	NA	NA	NA	NA	NA	CASHSTSGTELEPQHF	NA	:::::::::0:-8:9:19:2:-7:26:34:-8:48:::
BM31	479	6	0.015748	TGTGCCAGCAGTCCTGACAGACATAGCAATCAGCCCCAGCATTTT	FEEEFFFFFFEEFFEFEFFEFFEEFFFFEEFFFEEFFFEFFFEFE	TRBV12-3*00(253),TRBV12-4*00(253)	TRBD1*00(25)	TRBJ1-5*00(239)		430|442|467|0|12||60.0;430|442|467|0|12||60.0	14|19|36|15|20||25.0	19|42|70|22|45||115.0		NA	NA	NA	NA	NA	NA	NA	NA	NA	NA	TGTGCCAGCAGTCCTGACAGACATAGCAATCAGCCCCAGCATTTT	36	NA	NA	NA	NA	NA	NA	NA	CASSPDRHSNQPQHF	NA	:::::::::0:-5:12:15:-2:-5:20:22:1:45:::
BM31	480	6	0.015748	TGTTCCAGCAGTAGCACCTGGACAAAACAAGAGACCCAGTACTTC	FEEFEFFEEFFEEFEFEEFEFFEFFFFEFFEFFEFEFFEFEFFFE	TRBV12-3*00(237),TRBV12-4*00(237)	TRBD1*00(25)	TRBJ2-5*00(230)		430|442|467|0|12|SG433T|44.0;430|442|467|0|12|SG433T|44.0	13|18|36|19|24||25.0	22|40|68|27|45||90.0		NA	NA	NA	NA	NA	NA	NA	NA	NA	NA	TGTTCCAGCAGTAGCACCTGGACAAAACAAGAGACCCAGTACTTC	36	NA	NA	NA	NA	NA	NA	NA	CSSSSTWTKQETQYF	NA	:::::::::0:-5:12:19:-1:-6:24:27:-2:45:::
BM31	481	6	0.015748	TGTGCCAGCAGCCCCTCGTACAATGAGCAGTTCTTC	FEEEFEFEFFEFFFFEEEFEEFFFFFFEFFFFEFFF	TRBV16*00(303)		TRBJ2-1*00(234)		430|443|467|0|13||65.0		20|42|70|14|36|SC23G|94.0		NA	NA	NA	NA	NA	NA	NA	NA	NA	NA	TGTGCCAGCAGCCCCTCGTACAATGAGCAGTTCTTC	36	NA	NA	NA	NA	NA	NA	NA	CASSPSYNEQFF	NA	:::::::::0:-4:13:::::14:0:36:::
BM31	482	6	0.015748	TGCAGTGCTGAACAGGGAAATACGCAGTATTTT	FEFFFEEFFFFEEFEEEFEEEEEFEFEEEEEEE	TRBV20-1*00(377.7)	TRBD1*00(30)	TRBJ2-3*00(210)		421|430|455|0|9||45.0	15|21|36|11|17||30.0	27|41|69|19|33||70.0		NA	NA	NA	NA	NA	NA	NA	NA	NA	NA	TGCAGTGCTGAACAGGGAAATACGCAGTATTTT	36	NA	NA	NA	NA	NA	NA	NA	CSAEQGNTQYF	NA	:::::::::0:-5:9:11:-3:-3:17:19:-7:33:::
BM31	483	6	0.015748	TGTGCCAGCAGTCCTGGACTAGCGGGAGGAGGGGGGTGGGGGAGCACAGATACGCAGTATTTT	EEEEEFEEFEFEEFFEEEEFEFFEEEEFEEFEFFEFEEFEFFEFEFEEFEEEEEFEEFEEEEE	TRBV28*00(264)	TRBD2*00(70)	TRBJ2-3*00(245)		427|439|464|0|12||60.0	17|31|48|15|29||70.0	20|41|69|42|63||105.0		NA	NA	NA	NA	NA	NA	NA	NA	NA	NA	TGTGCCAGCAGTCCTGGACTAGCGGGAGGAGGGGGGTGGGGGAGCACAGATACGCAGTATTTT	36	NA	NA	NA	NA	NA	NA	NA	CASSPGLAGGGGWGSTDTQYF	NA	:::::::::0:-5:12:15:-1:-1:29:42:0:63:::
BM31	485	6	0.015748	TGCAGCGTTGAGTCAGGGTTTGGTGAAAAACTGTTTTTT	FFFFFFFEFFFFEFFFFFEFFEFEEFFEFEEFFEFFFFF	TRBV29-1*00(278)	TRBD1*00(25)	TRBJ1-4*00(194)		421|432|455|0|11||55.0	16|21|36|13|18||25.0	27|43|71|23|39||80.0		NA	NA	NA	NA	NA	NA	NA	NA	NA	NA	TGCAGCGTTGAGTCAGGGTTTGGTGAAAAACTGTTTTTT	36	NA	NA	NA	NA	NA	NA	NA	CSVESGFGEKLFF	NA	:::::::::0:-3:11:13:-4:-3:18:23:-7:39:::
BM31	486	6	0.015748	TGTGCCAGCAGAGGCAGCGTGTACACTGAAGCTTTCTTT	FFFEFEEEFFEFFFEEFEEEFEEEEEFEFEEFFEEEEEF	TRBV6-1*00(232),TRBV6-5*00(232),TRBV6-8*00(232),TRBV6-6*00(216)		TRBJ1-1*00(225)		427|438|464|0|11||55.0;427|438|464|0|11||55.0;424|435|461|0|11||55.0;427|438|464|0|11||55.0		23|40|68|22|39||85.0		NA	NA	NA	NA	NA	NA	NA	NA	NA	NA	TGTGCCAGCAGAGGCAGCGTGTACACTGAAGCTTTCTTT	36	NA	NA	NA	NA	NA	NA	NA	CASRGSVYTEAFF	NA	:::::::::0:-6:11:::::22:-3:39:::
BM31	537	5	0.0131234	TGTGCCAGTACCTGGACAGGGGGCTCCGCTCAGCCCCAGAATTTT	EEEEEFFEEEEEFEEEEFFEFEFEEFEEEFFFEEFFFEEFEEFEE	TRBV19*00(314)	TRBD1*00(55)	TRBJ1-5*00(204)		427|437|464|0|10||50.0	13|24|36|13|24||55.0	26|42|70|29|45|SC36A|64.0		NA	NA	NA	NA	NA	NA	NA	NA	NA	NA	TGTGCCAGTACCTGGACAGGGGGCTCCGCTCAGCCCCAGAATTTT	36	NA	NA	NA	NA	NA	NA	NA	CASTWTGGSAQPQNF	NA	:::::::::0:-7:10:13:-1:0:24:29:-6:45:::
BM31	538	5	0.0131234	TGCAGTGCTAGAGGTGGCAGCAATCAGCCCCAGCATTTT	EFEFFFEFEFEFEFEEEFFFEFEEEFEEEFEFEEEEEFE	TRBV20-1*00(403)		TRBJ1-5*00(245)		421|434|455|0|13||65.0		21|42|70|18|39||105.0		NA	NA	NA	NA	NA	NA	NA	NA	NA	NA	TGCAGTGCTAGAGGTGGCAGCAATCAGCCCCAGCATTTT	36	NA	NA	NA	NA	NA	NA	NA	CSARGGSNQPQHF	NA	:::::::::0:-1:13:::::18:-1:39:::
BM31	539	5	0.0131234	TGTGCCAGCAAACCCACGGGACAGAGGGTTTGCTACACTGAAGATTTCTTT	FEEEFFFFEEEEEFEEEEEEEEFFEFFFEEEFFEEFFFEFFFEFEFFFEFF	TRBV27*00(243)	TRBD1*00(44)	TRBJ1-1*00(209)		427|437|464|0|10||50.0	11|23|36|16|28|SG19A|44.0	23|40|68|34|51|SC32A|69.0		NA	NA	NA	NA	NA	NA	NA	NA	NA	NA	TGTGCCAGCAAACCCACGGGACAGAGGGTTTGCTACACTGAAGATTTCTTT	36	NA	NA	NA	NA	NA	NA	NA	CASKPTGQRVCYTEDFF	NA	:::::::::0:-7:10:16:1:-1:28:34:-3:51:::
BM31	540	5	0.0131234	TGTGCCTGGAGTGGGATTGGAAACACCATATATTTT	EFEFFEEEEEFEEEFEEEFFEEEEEEEFEFEEFEEE	TRBV30*00(567)		TRBJ1-3*00(235)		421|434|455|0|13||65.0		23|42|70|17|36||95.0		NA	NA	NA	NA	NA	NA	NA	NA	NA	NA	TGTGCCTGGAGTGGGATTGGAAACACCATATATTTT	36	NA	NA	NA	NA	NA	NA	NA	CAWSGIGNTIYF	NA	:::::::::0:-1:13:::::17:-3:36:::
BM31	541	5	0.0131234	TGTGCCAGCAGTGACCGGGCCAGGATTGCAACTAATGAAAAACTGTTTTTT	EEEEFFEFEEFEEFEEEFEEEEEFEEFEEFEFEEFEEFFEEEFFEFFEFFE	TRBV6-1*00(247),TRBV6-5*00(221),TRBV6-6*00(221),TRBV6-8*00(221)	TRBD1*00(34)	TRBJ1-4*00(260)		427|441|464|0|14||70.0;427|439|464|0|12||60.0;427|439|464|0|12||60.0;424|436|461|0|12||60.0	10|20|36|14|24|SA15C|34.0	17|43|71|25|51||130.0		NA	NA	NA	NA	NA	NA	NA	NA	NA	NA	TGTGCCAGCAGTGACCGGGCCAGGATTGCAACTAATGAAAAACTGTTTTTT	36	NA	NA	NA	NA	NA	NA	NA	CASSDRARIATNEKLFF	NA	:::::::::0:-3:14:14:2:-4:24:25:3:51:::
BM31	543	5	0.0131234	TGTGCCAGCACCAAGCGGACAGGGTTAGAGACCCAGTACTTC	EEEEFEEEEEFEFEFEEFEEEEEFEEEEFEEFFFFFFEFEEE	TRBV6-2*00(243),TRBV6-3*00(243)	TRBD1*00(40)	TRBJ2-5*00(220)		427|437|464|0|10||50.0;427|437|464|0|10||50.0	13|21|36|16|24||40.0	24|40|68|26|42||80.0		NA	NA	NA	NA	NA	NA	NA	NA	NA	NA	TGTGCCAGCACCAAGCGGACAGGGTTAGAGACCCAGTACTTC	36	NA	NA	NA	NA	NA	NA	NA	CASTKRTGLETQYF	NA	:::::::::0:-7:10:16:-1:-3:24:26:-4:42:::
BM31	583	4	0.0104987	TGTGCCAGCAGTTTAGGCCCCAATCAGCCCCAGCATTTT	FEFFFFFFEFFFFFFFFFFFEEEFFFFFFFEFFEEFFFE	TRBV12-3*00(209),TRBV12-4*00(209)		TRBJ1-5*00(235)		430|446|467|0|16||80.0;430|446|467|0|16||80.0		23|42|70|20|39||95.0		NA	NA	NA	NA	NA	NA	NA	NA	NA	NA	TGTGCCAGCAGTTTAGGCCCCAATCAGCCCCAGCATTTT	36	NA	NA	NA	NA	NA	NA	NA	CASSLGPNQPQHF	NA	:::::::::0:-1:16:::::20:-3:39:::
BM31	584	4	0.0104987	TGTGCCAGCAGTTTAATTAGGTTCAATGAGCAGTTCTTC	FFEFFFFFEFFEFEEEEEFFFFFFFEFFEFFFFEEFFEE	TRBV12-3*00(268),TRBV12-4*00(268)		TRBJ2-1*00(220)		430|445|467|0|15||75.0;430|445|467|0|15||75.0		26|42|70|23|39||80.0		NA	NA	NA	NA	NA	NA	NA	NA	NA	NA	TGTGCCAGCAGTTTAATTAGGTTCAATGAGCAGTTCTTC	36	NA	NA	NA	NA	NA	NA	NA	CASSLIRFNEQFF	NA	:::::::::0:-2:15:::::23:-6:39:::
BM31	585	4	0.0104987	TGTGCCAGCAGTTTACTAGCGGGACTTAGCACAGATACGCAGTATTTT	EEEFFFEEEEFEEEEFFEFEFFEEFEEFFFFFFEFEEEFFEFFEEEFF	TRBV12-3*00(268),TRBV12-4*00(268)	TRBD2*00(45)	TRBJ2-3*00(250)		430|445|467|0|15||75.0;430|445|467|0|15||75.0	20|29|48|15|24||45.0	19|41|69|26|48||110.0		NA	NA	NA	NA	NA	NA	NA	NA	NA	NA	TGTGCCAGCAGTTTACTAGCGGGACTTAGCACAGATACGCAGTATTTT	36	NA	NA	NA	NA	NA	NA	NA	CASSLLAGLSTDTQYF	NA	:::::::::0:-2:15:15:-4:-3:24:26:1:48:::
BM31	586	4	0.0104987	TGTGCCAGTAGTATTATCGGACAGAGCAATCAGCCCCAGCATTTT	EEEEFFFFEFEEFEFEEEFEEEFFFEFFFFEEFEEFFFFEFEFFE	TRBV19*00(334)	TRBD1*00(30)	TRBJ1-5*00(245)		427|441|464|0|14||70.0	13|19|36|18|24||30.0	21|42|70|24|45||105.0		NA	NA	NA	NA	NA	NA	NA	NA	NA	NA	TGTGCCAGTAGTATTATCGGACAGAGCAATCAGCCCCAGCATTTT	36	NA	NA	NA	NA	NA	NA	NA	CASSIIGQSNQPQHF	NA	:::::::::0:-3:14:18:-1:-5:24:24:-1:45:::
BM31	587	4	0.0104987	TGTGCCAGCAGTTTATCCCAGGGTAATCAGCCCCAGCATTTT	FEFEFFFFEFFEEEFEFFFFEEFEFEEEFEFFFFFEFEEFFF	TRBV27*00(278)	TRBD1*00(25)	TRBJ1-5*00(230)		427|444|464|0|17||85.0	16|21|36|18|23||25.0	24|42|70|24|42||90.0		NA	NA	NA	NA	NA	NA	NA	NA	NA	NA	TGTGCCAGCAGTTTATCCCAGGGTAATCAGCCCCAGCATTTT	36	NA	NA	NA	NA	NA	NA	NA	CASSLSQGNQPQHF	NA	:::::::::0:0:17:18:-4:-3:23:24:-4:42:::
BM31	588	4	0.0104987	TGTGCCAGCACCCTGACAGGGAGGCTAGCCAAAAACATTCAGTACTTC	EFEEEFEEEEFFEEEEFFEEEFEEFEFEFEEFFFEEEFEEFEEEEEEE	TRBV27*00(296)	TRBD1*00(35)	TRBJ2-4*00(120)		427|437|464|0|10||50.0	14|21|36|14|21||35.0	16|42|70|22|48||130.0		NA	NA	NA	NA	NA	NA	NA	NA	NA	NA	TGTGCCAGCACCCTGACAGGGAGGCTAGCCAAAAACATTCAGTACTTC	36	NA	NA	NA	NA	NA	NA	NA	CASTLTGRLAKNIQYF	NA	:::::::::0:-7:10:14:-2:-3:21:22:4:48:::
BM31	589	4	0.0104987	TGTGCCAGCAGATTCCAGGGGGTGAGGTATGGCTACACCTTC	EEEFEEFFEFFEEEEEEFEFEFEEEEFFEEEEFEEFEFEEFE	TRBV28*00(259)	TRBD1*00(35)	TRBJ1-2*00(215)		427|438|464|0|11||55.0	16|23|36|15|22||35.0	25|40|68|27|42||75.0		NA	NA	NA	NA	NA	NA	NA	NA	NA	NA	TGTGCCAGCAGATTCCAGGGGGTGAGGTATGGCTACACCTTC	36	NA	NA	NA	NA	NA	NA	NA	CASRFQGVRYGYTF	NA	:::::::::0:-6:11:15:-4:-1:22:27:-5:42:::
BM31	591	4	0.0104987	TGTGCCAGCAGTGTACAGGGTCTAGGGTTTAACTATGGCTACACCTTC	EFEEEEFEEFFEFEEFFFFEEFFEEEFEFFEFFFEEFFFEEFEFEEFE	TRBV6-2*00(237),TRBV6-3*00(237),TRBV6-1*00(210)	TRBD1*00(30)	TRBJ1-2*00(235)		427|439|464|0|12||60.0;427|439|464|0|12||60.0;427|440|464|0|13||65.0	15|21|36|14|20||30.0	21|40|68|29|48||95.0		NA	NA	NA	NA	NA	NA	NA	NA	NA	NA	TGTGCCAGCAGTGTACAGGGTCTAGGGTTTAACTATGGCTACACCTTC	36	NA	NA	NA	NA	NA	NA	NA	CASSVQGLGFNYGYTF	NA	:::::::::0:-5:12:14:-3:-3:20:29:-1:48:::
BM31	592	4	0.0104987	TGTGCCAGCACTTACAAGGGGAGCACAGATACGCAGTATTTT	FFEFEFFEEEFEFEFFFFEFEFEFEFFEEEEEEEFFEEEFFF	TRBV6-2*00(252),TRBV6-3*00(252)	TRBD1*00(25)	TRBJ2-3*00(245)		427|442|464|0|15|SG437C|59.0;427|442|464|0|15|SG437C|59.0	17|22|36|16|21||25.0	20|41|69|21|42||105.0		NA	NA	NA	NA	NA	NA	NA	NA	NA	NA	TGTGCCAGCACTTACAAGGGGAGCACAGATACGCAGTATTTT	36	NA	NA	NA	NA	NA	NA	NA	CASTYKGSTDTQYF	NA	:::::::::0:-2:15:16:-5:-2:21:21:0:42:::
BM31	593	4	0.0104987	TGTGCCAGCAGTTACCCGGGCGTTCTAGCCAAAAACATTCAGTACTTC	EEEEFEEEFEEEEAEFFEEEEEEEFEEEEEEEEFEEEEEEEFEEFFEE	TRBV6-2*00(252),TRBV6-3*00(252)	TRBD1*00(25),TRBD2*00(25)	TRBJ2-4*00(250)		427|442|464|0|15||75.0;427|442|464|0|15||75.0	10|15|36|15|20||25.0;14|19|48|15|20||25.0	18|42|70|24|48||120.0		NA	NA	NA	NA	NA	NA	NA	NA	NA	NA	TGTGCCAGCAGTTACCCGGGCGTTCTAGCCAAAAACATTCAGTACTTC	32	NA	NA	NA	NA	NA	NA	NA	CASSYPGVLAKNIQYF	NA	:::::::::0:-2:15:15:2:-9:20:24:2:48:::
BM31	614	3	0.00787402	TGCGCCAGCAGTGACTCATTATATGGCTACACCTTC	EEEEEFEEEEEEEEEEEEEEEEEEEEEEEEEFFEEE	TRBV10-1*00(262)		TRBJ1-2*00(215)		427|441|464|0|14||70.0		25|40|68|21|36||75.0		NA	NA	NA	NA	NA	NA	NA	NA	NA	NA	TGCGCCAGCAGTGACTCATTATATGGCTACACCTTC	36	NA	NA	NA	NA	NA	NA	NA	CASSDSLYGYTF	NA	:::::::::0:-3:14:::::21:-5:36:::
BM31	615	3	0.00787402	TGTGCCACCAGAAGTGGAGGGGACGCTCAAGAGACCCAGTACTTC	EEEFEEEEEEEEEEEFEEFEEFEEEEEEFFEEFEEEEFFEEFEEE	TRBV15*00(236)	TRBD2*00(30),TRBD1*00(29)	TRBJ2-5*00(230)		427|438|464|0|11||55.0	26|32|48|15|21||30.0;17|26|36|17|26|SG22A|29.0	22|40|68|27|45||90.0		NA	NA	NA	NA	NA	NA	NA	NA	NA	NA	TGTGCCACCAGAAGTGGAGGGGACGCTCAAGAGACCCAGTACTTC	36	NA	NA	NA	NA	NA	NA	NA	CATRSGGDAQETQYF	NA	:::::::::0:-6:11:15:-10:0:21:27:-2:45:::
BM31	616	3	0.00787402	TGTGCCAGCAGTTTACCGGGGGGTACGCAAGAGACCCAGTACTTC	FEEEEFEEEFEEEEEEEEEEFEEEEEEEEEEEEEEEEEEEEEEEE	TRBV28*00(273.7)	TRBD1*00(25),TRBD2*00(25)	TRBJ2-5*00(234)		427|442|464|0|15||75.0	10|15|36|15|20||25.0;14|19|48|15|20||25.0	17|40|68|21|45|I22G|94.0		NA	NA	NA	NA	NA	NA	NA	NA	NA	NA	TGTGCCAGCAGTTTACCGGGGGGTACGCAAGAGACCCAGTACTTC	36	NA	NA	NA	NA	NA	NA	NA	CASSLPGGTQETQYF	NA	:::::::::0:-2:15:15:2:-9:20:21:3:45:::
BM31	617	3	0.00787402	TGTGCCAGCTTTGACGGAAACACCGGGGAGCTGTTTTTT	FEFEFEEFEEFFEEFEFEEEFEEFEFFFEEEFFEEFEFF	TRBV6-2*00(222),TRBV6-3*00(222)		TRBJ2-2*00(245)		427|436|464|0|9||45.0;427|436|464|0|9||45.0		22|43|71|18|39||105.0		NA	NA	NA	NA	NA	NA	NA	NA	NA	NA	TGTGCCAGCTTTGACGGAAACACCGGGGAGCTGTTTTTT	36	NA	NA	NA	NA	NA	NA	NA	CASFDGNTGELFF	NA	:::::::::0:-8:9:::::18:-2:39:::
BM31	618	3	0.00787402	TGTGCCAGCAGCTCCATCCGACAGGGGGTGACCCGCACCGGGGAGCTGTTTTTT	FEEFEEEEEEEEEEFEEEEEEFEFEFEEEEEFEEEEEEEEEEEEEEEEEEFEEE	TRBV7-8*00(354),TRBV7-2*00(332)	TRBD1*00(45)	TRBJ2-2*00(235)		430|443|467|0|13||65.0;430|443|467|0|13||65.0	14|23|36|19|28||45.0	24|43|71|35|54||95.0		NA	NA	NA	NA	NA	NA	NA	NA	NA	NA	TGTGCCAGCAGCTCCATCCGACAGGGGGTGACCCGCACCGGGGAGCTGTTTTTT	36	NA	NA	NA	NA	NA	NA	NA	CASSSIRQGVTRTGELFF	NA	:::::::::0:-4:13:19:-2:-1:28:35:-4:54:::
BM31	635	2	0.00524934	TGTGCCAGCAGCTTAGCCGGGCTCAGCAATCAGCCCCAGCATTTT	EEEEEEEFEEEFEEEEEFEEEEEEFEEEEEEEFEEEEEEEEEEEE	TRBV11-2*00(422),TRBV11-3*00(390),TRBV11-1*00(379)	TRBD1*00(25),TRBD2*00(25)	TRBJ1-5*00(245)		430|446|467|0|16||80.0;430|446|467|0|16||80.0;430|447|467|0|17||85.0	10|15|36|16|21||25.0;14|19|48|16|21||25.0	21|42|70|24|45||105.0		NA	NA	NA	NA	NA	NA	NA	NA	NA	NA	TGTGCCAGCAGCTTAGCCGGGCTCAGCAATCAGCCCCAGCATTTT	36	NA	NA	NA	NA	NA	NA	NA	CASSLAGLSNQPQHF	NA	:::::::::0:-1:16:16:2:-9:21:24:-1:45:::
BM31	636	2	0.00524934	TGTGCCAGCAGCCAAGTCGCAGGGAGCACTGAAGCTTTCTTT	EFEEFEEEEEEFFEEFEEEEEFFFEFEEEEEFEEFFEEEEEE	TRBV14*00(373)	TRBD1*00(25),TRBD2*00(25)	TRBJ1-1*00(140)		430|446|467|0|16||80.0	16|21|36|19|24||25.0;25|30|48|21|26||25.0	24|40|68|26|42||80.0		NA	NA	NA	NA	NA	NA	NA	NA	NA	NA	TGTGCCAGCAGCCAAGTCGCAGGGAGCACTGAAGCTTTCTTT	36	NA	NA	NA	NA	NA	NA	NA	CASSQVAGSTEAFF	NA	:::::::::0:-1:16:19:-4:-3:24:26:-4:42:::
BM31	637	2	0.00524934	TGTGCCAGCAGTTACGGGACTAGCGGTACCCCCCCCCACGAGCAGTACTTC	FEEEEFEEEEEEEDFFEEEEEEEEEEDEEFFFEFEFEEEEEEEFEEEEEFE	TRBV6-2*00(268),TRBV6-3*00(268)	TRBD2*00(55)	TRBJ2-7*00(210)		427|442|464|0|15||75.0;427|442|464|0|15||75.0	16|27|48|15|26||55.0	25|39|67|37|51||70.0		NA	NA	NA	NA	NA	NA	NA	NA	NA	NA	TGTGCCAGCAGTTACGGGACTAGCGGTACCCCCCCCCACGAGCAGTACTTC	35	NA	NA	NA	NA	NA	NA	NA	CASSYGTSGTPPHEQYF	NA	:::::::::0:-2:15:15:0:-5:26:37:-5:51:::
BM31	657	1	0.00262467	TGTGCCAGCAGTGACAGGTTTTATGGCTACACCTTC	FEEEEEEFFEFEEEFEFFFEFEEFEEEEEEEFEEEE	TRBV2*00(329)		TRBJ1-2*00(215)		430|444|467|0|14||70.0		25|40|68|21|36||75.0		NA	NA	NA	NA	NA	NA	NA	NA	NA	NA	TGTGCCAGCAGTGACAGGTTTTATGGCTACACCTTC	36	NA	NA	NA	NA	NA	NA	NA	CASSDRFYGYTF	NA	:::::::::0:-3:14:::::21:-5:36:::
BM31	658	1	0.00262467	TACAGTCCCCGCCAGGACAGGGGGCGAGATAGCTATGGCTACACCTTC	EEFEEEEEEFEEFEEFEEEEEEEEEEEEE9EEEEEEEDEEEFEEEEFE	TRBV20-1*00(336)	TRBD1*00(60)	TRBJ1-2*00(220)		421|427|455|0|6|SG422A|14.0	13|25|36|14|26||60.0	24|40|68|32|48||80.0		NA	NA	NA	NA	NA	NA	NA	NA	NA	NA	TACAGTCCCCGCCAGGACAGGGGGCGAGATAGCTATGGCTACACCTTC	24	NA	NA	NA	NA	NA	NA	NA	YSPRQDRGRDSYGYTF	NA	:::::::::0:-8:6:14:-1:1:26:32:-4:48:::
BM31	659	1	0.00262467	TGTGCCAGCTGCCGGACAGAGAATAATTCACCCCTCCACTTT	FEEEEFEEFEFFEEEEFFEFFEEEFEEEEEEEEEEFFFFEEE	TRBV6-2*00(238),TRBV6-3*00(238)	TRBD1*00(30)	TRBJ1-6*00(224)		427|436|464|0|9||45.0;427|436|464|0|9||45.0	13|19|36|13|19||30.0	25|45|73|22|42||100.0		NA	NA	NA	NA	NA	NA	NA	NA	NA	NA	TGTGCCAGCTGCCGGACAGAGAATAATTCACCCCTCCACTTT	36	NA	NA	NA	NA	NA	NA	NA	CASCRTENNSPLHF	NA	:::::::::0:-8:9:13:-1:-5:19:22:-5:42:::
BM31	661	1	0.00262467	TGTGCCAGCAGTTACAAGGGGGCATCTTCACCCCTCCACTTT	FEEEEEEEEEEEEEEEEEEEFEEFEEEFEEEEEFEEEEFEEE	TRBV6-5*00(252),TRBV6-8*00(252),TRBV6-1*00(237),TRBV6-6*00(236)	TRBD1*00(35)	TRBJ1-6*00(220)		427|442|464|0|15||75.0;424|439|461|0|15||75.0;427|439|464|0|12||60.0;427|442|464|0|15||75.0	17|24|36|16|23||35.0	29|45|73|26|42||80.0		NA	NA	NA	NA	NA	NA	NA	NA	NA	NA	TGTGCCAGCAGTTACAAGGGGGCATCTTCACCCCTCCACTTT	36	NA	NA	NA	NA	NA	NA	NA	CASSYKGASSPLHF	NA	:::::::::0:-2:15:16:-5:0:23:26:-9:42:::
BM31	662	1	0.00262467	TGTGCCAGCAGTTACCATCATTCGGTAGAGCAGTTCTTC	FEEEEEFFFFEEEEFFFEFEFEEFFEEFEEFEFFEEEEE	TRBV6-5*00(252),TRBV6-8*00(252),TRBV6-1*00(237),TRBV6-6*00(236)		TRBJ2-1*00(200)		427|442|464|0|15||75.0;424|439|461|0|15||75.0;427|439|464|0|12||60.0;427|442|464|0|15||75.0		30|42|70|27|39||60.0		NA	NA	NA	NA	NA	NA	NA	NA	NA	NA	TGTGCCAGCAGTTACCATCATTCGGTAGAGCAGTTCTTC	36	NA	NA	NA	NA	NA	NA	NA	CASSYHHSVEQFF	NA	:::::::::0:-2:15:::::27:-10:39:::
BM31	663	1	0.00262467	TGTGCCAGCAGCCCCGGACCAGCGAACACTGAAGCTTTCTTT	EEEEEEEEEEEEDEEEEEEEEEEEEEEEEEEEEEEEEEEEEE	TRBV7-8*00(349),TRBV7-2*00(327)	TRBD1*00(25),TRBD2*00(25)	TRBJ1-1*00(235)		430|442|467|0|12||60.0;430|442|467|0|12||60.0	9|14|36|12|17||25.0;13|18|48|12|17||25.0	21|40|68|23|42||95.0		NA	NA	NA	NA	NA	NA	NA	NA	NA	NA	TGTGCCAGCAGCCCCGGACCAGCGAACACTGAAGCTTTCTTT	35	NA	NA	NA	NA	NA	NA	NA	CASSPGPANTEAFF	NA	:::::::::0:-5:12:12:3:-10:17:23:-1:42:::
BM32	4	25	0.471698	TGTGCCAGCAGCTTCGGTACAGATACGCAGTATTTT	FFFFEFFFFFFFFFFFFFEFFFFEEFFFFFFFFFFF	TRBV5-6*00(108)		TRBJ2-3*00(230)	TRBC2*00(76)	427|441|463|0|14||70.0		23|41|69|18|36||90.0		NA	NA	NA	NA	NA	NA	NA	NA	NA	NA	TGTGCCAGCAGCTTCGGTACAGATACGCAGTATTTT	36	NA	NA	NA	NA	NA	NA	NA	CASSFGTDTQYF	NA	:::::::::0:-2:14:::::18:-3:36:::
BM32	10	7	0.132075	TGTGCCAGCAGTTTACCCCTTTCCGGGACAGGGGGCACTGAAGCTTTCTTT	EEEEEEAEEEEEEEDEEEEEEEEEEEEEDEDEDECEEEDBDEDEDECDEEE	TRBV28*00(201.4)	TRBD1*00(65)	TRBJ1-1*00(158)		427|442|464|0|15||75.0	10|23|36|22|35||65.0	24|40|68|35|51||80.0		NA	NA	NA	NA	NA	NA	NA	NA	NA	NA	TGTGCCAGCAGTTTACCCCTTTCCGGGACAGGGGGCACTGAAGCTTTCTTT	32	NA	NA	NA	NA	NA	NA	NA	CASSLPLSGTGGTEAFF	NA	:::::::::0:-2:15:22:2:-1:35:35:-4:51:::
BM32	12	3	0.0566038	TGTGCCACCAGCAGAGTAATGGGAGGCTCCTATAATTCACCCCTCCACTTT	DEEEDFEEEEEAEEEEEEEEEEEEBEE<EEEEEDEEECEBEEEDEEEEEEE	TRBV15*00(210.5)	TRBD2*00(25)	TRBJ1-6*00(270)		427|443|464|0|16||80.0	25|30|48|20|25||25.0	19|45|73|25|51||130.0		NA	NA	NA	NA	NA	NA	NA	NA	NA	NA	TGTGCCACCAGCAGAGTAATGGGAGGCTCCTATAATTCACCCCTCCACTTT	27	NA	NA	NA	NA	NA	NA	NA	CATSRVMGGSYNSPLHF	NA	:::::::::0:-1:16:20:-9:-2:25:25:1:51:::
BM32	13	2	0.0377358	TGTGCCATCAGTGAGATAGCGGACACTGAAGCTTTCTTT	EEEEEEBEEEEEDEEDCEAEEDDEDEEEEEDEEEEFEEE	TRBV10-3*00(191)	TRBD2*00(30)	TRBJ1-1*00(225)		427|442|464|0|15||75.0	21|27|48|16|22||30.0	23|40|68|22|39||85.0		NA	NA	NA	NA	NA	NA	NA	NA	NA	NA	TGTGCCATCAGTGAGATAGCGGACACTGAAGCTTTCTTT	32	NA	NA	NA	NA	NA	NA	NA	CAISEIADTEAFF	NA	:::::::::0:-2:15:16:-5:-5:22:22:-3:39:::
BM32	14	2	0.0377358	TGTGCCAGCGGTGACAGCTATGGCTACACCTTC	EDEEDD@ED>ED?;EEBDDDEDDBC6E;D:ECB	TRBV2*00(224)		TRBJ1-2*00(220)		430|444|467|0|14|SA439G|54.0		24|40|68|17|33||80.0		NA	NA	NA	NA	NA	NA	NA	NA	NA	NA	TGTGCCAGCGGTGACAGCTATGGCTACACCTTC	21	NA	NA	NA	NA	NA	NA	NA	CASGDSYGYTF	NA	:::::::::0:-3:14:::::17:-4:33:::
BM32	15	2	0.0377358	TGTGCCAGCAGGCACGGGACAGCAGGGGTTAGGGAGCAGTACTTC	DDEDDDBDEDEDDBBEEEEDEEEEEEEECAEBDDDDEDDDBEECC	TRBV6-1*00(165),TRBV6-5*00(165),TRBV6-6*00(165)	TRBD1*00(40)	TRBJ2-7*00(160)		427|438|464|0|11||55.0;427|438|464|0|11||55.0;427|438|464|0|11||55.0	11|19|36|14|22||40.0	27|39|67|33|45||60.0		NA	NA	NA	NA	NA	NA	NA	NA	NA	NA	TGTGCCAGCAGGCACGGGACAGCAGGGGTTAGGGAGCAGTACTTC	32	NA	NA	NA	NA	NA	NA	NA	CASRHGTAGVREQYF	NA	:::::::::0:-6:11:14:1:-5:22:33:-7:45:::
BM32	16	2	0.0377358	TGTGCCAGCAGCCGGCGGACAGGTGGAAACGAGCAGTACTTC	DDDDCED>D8@BEE@DEB<DEEEEEEDCBCEBD>A@E@DECD	TRBV7-6*00(185),TRBV7-7*00(169)	TRBD1*00(35)	TRBJ2-7*00(210)		430|442|467|0|12||60.0;430|442|467|0|12||60.0	13|20|36|16|23||35.0	25|39|67|28|42||70.0		NA	NA	NA	NA	NA	NA	NA	NA	NA	NA	TGTGCCAGCAGCCGGCGGACAGGTGGAAACGAGCAGTACTTC	23	NA	NA	NA	NA	NA	NA	NA	CASSRRTGGNEQYF	NA	:::::::::0:-5:12:16:-1:-4:23:28:-5:42:::
BM32	17	1	0.0188679	TGTGCCATCAGTGAACAGGCGAGTGACTATGAGGATGGCTACACCTTC	?AD@CCC@CDDDDC@BD9CDEDEDDAACBEDE@ACC@=:BDB9C9=C>	TRBV10-3*00(165),TRBV6-1*00(154)	TRBD1*00(25),TRBD2*00(25)	TRBJ1-2*00(210)		427|441|464|0|14||70.0;427|442|464|0|15|SG434T|59.0	15|20|36|14|19||25.0;18|23|48|24|29||25.0	26|40|68|34|48||70.0		NA	NA	NA	NA	NA	NA	NA	NA	NA	NA	TGTGCCATCAGTGAACAGGCGAGTGACTATGAGGATGGCTACACCTTC	24	NA	NA	NA	NA	NA	NA	NA	CAISEQASDYEDGYTF	NA	:::::::::0:-3:14:14:-3:-4:19:34:-6:48:::
BM32	18	1	0.0188679	TGTGCCATCAGTGATTCGGCGCAGGGGAGTGGAAACACCATATATTTT	EEEECECEEEEEEEEDEDE?EEEEDEF>EEBCEEEAEDEEEAECE<ED	TRBV10-3*00(169),TRBV6-1*00(149)	TRBD1*00(30)	TRBJ1-3*00(235)		427|445|464|0|18|SG441T|74.0;427|441|464|0|14|SG434T|54.0	16|22|36|21|27||30.0	23|42|70|29|48||95.0		NA	NA	NA	NA	NA	NA	NA	NA	NA	NA	TGTGCCATCAGTGATTCGGCGCAGGGGAGTGGAAACACCATATATTTT	27	NA	NA	NA	NA	NA	NA	NA	CAISDSAQGSGNTIYF	NA	:::::::::0:1:18:21:-4:-2:27:29:-3:48:::
BM32	19	1	0.0188679	TGTGCCATCAGTGAGTCTCCTAGCGGGAGTACTCTGGATACGCAGTATTTT	EEEEEE@EDEEEEECEEEEEEEEEEEDEBEEECEEEEEEBEEEEEEEEE?E	TRBV10-3*00(205)	TRBD2*00(50)	TRBJ2-3*00(147)		427|444|464|0|17||85.0	20|30|48|19|29||50.0	26|41|69|36|51||75.0		NA	NA	NA	NA	NA	NA	NA	NA	NA	NA	TGTGCCATCAGTGAGTCTCCTAGCGGGAGTACTCTGGATACGCAGTATTTT	30	NA	NA	NA	NA	NA	NA	NA	CAISESPSGSTLDTQYF	NA	:::::::::0:0:17:19:-4:-2:29:36:-6:51:::
BM32	21	1	0.0188679	TGTGCCAGCAGTTTGGGTGGAAAGCAGTTCTTC	EEDC6CCEEEEEAACEEDEEEEECCEDE@EECD	TRBV12-3*00(204),TRBV12-4*00(204)		TRBJ2-1*00(195)		430|444|467|0|14||70.0;430|444|467|0|14||70.0		31|42|70|22|33||55.0		NA	NA	NA	NA	NA	NA	NA	NA	NA	NA	TGTGCCAGCAGTTTGGGTGGAAAGCAGTTCTTC	21	NA	NA	NA	NA	NA	NA	NA	CASSLGGKQFF	NA	:::::::::0:-3:14:::::22:-11:33:::
BM32	22	1	0.0188679	TGTGCCAGCAGCTACGGTAGCACCCTCGTTGGGGCCCAGTACTTC	BEDEED@EE<DEDBDEECCCEADEDD?EDCEBDDECADED<DD@B	TRBV12-3*00(190),TRBV12-4*00(190)	TRBD2*00(25)	TRBJ2-5*00(195)		430|441|467|0|11||55.0;430|441|467|0|11||55.0	0|5|48|22|27||25.0	29|40|68|34|45||55.0		NA	NA	NA	NA	NA	NA	NA	NA	NA	NA	TGTGCCAGCAGCTACGGTAGCACCCTCGTTGGGGCCCAGTACTTC	27	NA	NA	NA	NA	NA	NA	NA	CASSYGSTLVGAQYF	NA	:::::::::0:-6:11:22:16:-27:27:34:-9:45:::
BM32	23	1	0.0188679	TGTGCCAGTAGTATCATATCGGGGCAGGGGCACAATGAGCAGTTCTTC	EDEEDEEEEEEDEDEEEDEEEEEEEEEEEEEBEEEEEEDEEEEEEEEE	TRBV19*00(145)	TRBD1*00(39)	TRBJ2-1*00(225)		427|441|464|0|14||70.0	11|22|36|19|30|SA15G|39.0	25|42|70|31|48||85.0		NA	NA	NA	NA	NA	NA	NA	NA	NA	NA	TGTGCCAGTAGTATCATATCGGGGCAGGGGCACAATGAGCAGTTCTTC	33	NA	NA	NA	NA	NA	NA	NA	CASSIISGQGHNEQFF	NA	:::::::::0:-3:14:19:1:-2:30:31:-5:48:::
BM32	24	1	0.0188679	TGTGCCAGCAGGCAGGGGTACGAGCAGTACTTC	CEA>DEEDAEBC@B@@E<D>D<B?EE?B<EAC?	TRBV2*00(225)	TRBD1*00(30)	TRBJ2-7*00(215)		430|441|467|0|11||55.0	16|22|36|12|18||30.0	24|39|67|18|33||75.0		NA	NA	NA	NA	NA	NA	NA	NA	NA	NA	TGTGCCAGCAGGCAGGGGTACGAGCAGTACTTC	27	NA	NA	NA	NA	NA	NA	NA	CASRQGYEQYF	NA	:::::::::0:-6:11:12:-4:-2:18:18:-4:33:::
BM32	25	1	0.0188679	TGTGCCAGCGGGACTAGCGGGGACCAAGAGACCCAGTACTTC	FEEEEEEFEEEEEEFEFFEEFEEEFEEFEFEEFEEEEEEEEE	TRBV24-1*00(258)	TRBD2*00(65)	TRBJ2-5*00(240)		427|434|465|0|7||35.0	15|28|48|8|21||65.0	20|40|68|22|42||100.0		NA	NA	NA	NA	NA	NA	NA	NA	NA	NA	TGTGCCAGCGGGACTAGCGGGGACCAAGAGACCCAGTACTTC	36	NA	NA	NA	NA	NA	NA	NA	CASGTSGDQETQYF	NA	:::::::::0:-11:7:8:1:-4:21:22:0:42:::
BM32	26	1	0.0188679	TGTGCCAGCAGTTTGCGTGGCCGGGGCACAGATACGCAGTATTTT	C6AADD9EE>DEEECCBEEEAECEDAE8ECBECEBCBEEEDED@D	TRBV27*00(165)	TRBD1*00(25),TRBD2*00(25)	TRBJ2-3*00(240)		427|441|464|0|14||70.0	10|15|36|20|25||25.0;14|19|48|20|25||25.0	21|41|69|25|45||100.0		NA	NA	NA	NA	NA	NA	NA	NA	NA	NA	TGTGCCAGCAGTTTGCGTGGCCGGGGCACAGATACGCAGTATTTT	21	NA	NA	NA	NA	NA	NA	NA	CASSLRGRGTDTQYF	NA	:::::::::0:-3:14:20:2:-9:25:25:-1:45:::
BM32	28	1	0.0188679	TGTGCCAGCTTACCATTTTCGATGAACACTGAAGCTTTCTTT	EEEEEEEEEEEEEEEEEDEEEEEEEEEEEEEEEEEEEEEFFE	TRBV28*00(249)		TRBJ1-1*00(245)		427|436|464|0|9||45.0		19|40|68|21|42||105.0		NA	NA	NA	NA	NA	NA	NA	NA	NA	NA	TGTGCCAGCTTACCATTTTCGATGAACACTGAAGCTTTCTTT	35	NA	NA	NA	NA	NA	NA	NA	CASLPFSMNTEAFF	NA	:::::::::0:-8:9:::::21:1:42:::
BM33	0	65	0.215232	TGTGCCAGCAGCTACCGAGGGGGTACTGAAGCTTTCTTT	EEEEDEEEEECEEDEEEEEEEEEEEEEEEEEEEEEEEEE	TRBV5-5*00(197.1)	TRBD1*00(30)	TRBJ1-1*00(205.7)		427|440|463|0|13||65.0	17|23|36|17|23||30.0	25|40|68|24|39||75.0		NA	NA	NA	NA	NA	NA	NA	NA	NA	NA	TGTGCCAGCAGCTACCGAGGGGGTACTGAAGCTTTCTTT	34	NA	NA	NA	NA	NA	NA	NA	CASSYRGGTEAFF	NA	:::::::::0:-3:13:17:-5:-1:23:24:-5:39:::
BM33	1	54	0.178808	TGTGCCAGCAGTTTAAATCCGCGTCTAGCGGGAGGGGCAGATACGCAGTATTTT	EEEEEEEEEEEEEEEEEEEEEEEDEEEEEEEEEEEEEEEEEEEEEEEEEEEDEE	TRBV12-3*00(124.5),TRBV12-4*00(124.5)	TRBD2*00(60)	TRBJ2-3*00(219.2)		430|445|467|0|15||75.0;430|445|467|0|15||75.0	20|32|48|24|36||60.0	24|41|69|37|54||85.0		NA	NA	NA	NA	NA	NA	NA	NA	NA	NA	TGTGCCAGCAGTTTAAATCCGCGTCTAGCGGGAGGGGCAGATACGCAGTATTTT	35	NA	NA	NA	NA	NA	NA	NA	CASSLNPRLAGGADTQYF	NA	:::::::::0:-2:15:24:-4:0:36:37:-4:54:::
BM33	22	9	0.0298013	TGTGCCAGTAGCCCGAACGTTGGGTACGAGCAGTACTTC	EEEECEEDEDEEDBEEDEDDEEDEDAEEDDEEEECDECC	TRBV19*00(167.6)		TRBJ2-7*00(203)		427|438|464|0|11||55.0		24|39|67|24|39||75.0		NA	NA	NA	NA	NA	NA	NA	NA	NA	NA	TGTGCCAGTAGCCCGAACGTTGGGTACGAGCAGTACTTC	32	NA	NA	NA	NA	NA	NA	NA	CASSPNVGYEQYF	NA	:::::::::0:-6:11:::::24:-4:39:::
BM33	23	9	0.0298013	TGTGCCACCACCCGTCGGGGGGCAGGGGGAATGGGCTACGAGCAGTACTTC	EEEEFFEFFFFFFFEEFFFFFFEEFFFFFFFEFFFFEEFFEFEFFFEFFFE	TRBV28*00(239)	TRBD1*00(39)	TRBJ2-7*00(220)		427|434|464|0|7||35.0	12|23|36|18|29|SA15G|39.0	23|39|67|35|51||80.0		NA	NA	NA	NA	NA	NA	NA	NA	NA	NA	TGTGCCACCACCCGTCGGGGGGCAGGGGGAATGGGCTACGAGCAGTACTTC	36	NA	NA	NA	NA	NA	NA	NA	CATTRRGAGGMGYEQYF	NA	:::::::::0:-10:7:18:0:-1:29:35:-3:51:::
BM33	24	9	0.0298013	TGTGCCAGCAGCTTTTTCGACAGGGGTAGAGAGACCCAGTACTTC	EEEEDEDDEEDDEEDEECEECEEEEEDEEDEEEEDBEEEEAEEDC	TRBV7-9*00(205)	TRBD1*00(40)	TRBJ2-5*00(214.9)		430|444|467|0|14||70.0	14|22|36|18|26||40.0	24|40|68|29|45||80.0		NA	NA	NA	NA	NA	NA	NA	NA	NA	NA	TGTGCCAGCAGCTTTTTCGACAGGGGTAGAGAGACCCAGTACTTC	32	NA	NA	NA	NA	NA	NA	NA	CASSFFDRGRETQYF	NA	:::::::::0:-3:14:18:-2:-2:26:29:-4:45:::
BM33	35	8	0.0264901	TGTGCCAGCAGTTACTCGGAGGAATACGAGCAGTACTTC	DEEEBEDEEEEEDEEDEDBDEEDDD<EEEEEEEDCDCEE	TRBV6-2*00(210),TRBV6-3*00(210),TRBV6-5*00(202),TRBV6-6*00(202)		TRBJ2-7*00(160.5)		427|445|464|0|18||90.0;427|445|464|0|18||90.0;427|445|464|0|18||90.0;427|445|464|0|18||90.0		24|39|67|24|39||75.0		NA	NA	NA	NA	NA	NA	NA	NA	NA	NA	TGTGCCAGCAGTTACTCGGAGGAATACGAGCAGTACTTC	27	NA	NA	NA	NA	NA	NA	NA	CASSYSEEYEQYF	NA	:::::::::0:1:18:::::24:-4:39:::
BM33	48	7	0.0231788	TGTGCCAGTAGTATTTTTGGTGAGCAGTTCTTC	EEEEEDEDDBEEEEEEDEEEDEEEDEDEDECEE	TRBV19*00(206.4)		TRBJ2-1*00(201.8)		427|441|464|0|14||70.0		29|42|70|20|33||65.0		NA	NA	NA	NA	NA	NA	NA	NA	NA	NA	TGTGCCAGTAGTATTTTTGGTGAGCAGTTCTTC	33	NA	NA	NA	NA	NA	NA	NA	CASSIFGEQFF	NA	:::::::::0:-3:14:::::20:-9:33:::
BM33	49	7	0.0231788	TGCAGTGCTGGAATGGGAACGGGGGGCGGAGCAGATACGCAGTATTTT	DEEEEEEDEEDDECEEEEEBEEEEDEEEEEEEEEEEEECEEEEECEEE	TRBV20-1*00(130)	TRBD1*00(35)	TRBJ2-3*00(198.3)		421|430|455|0|9||45.0	18|25|36|21|28||35.0	24|41|69|31|48||85.0		NA	NA	NA	NA	NA	NA	NA	NA	NA	NA	TGCAGTGCTGGAATGGGAACGGGGGGCGGAGCAGATACGCAGTATTTT	33	NA	NA	NA	NA	NA	NA	NA	CSAGMGTGGGADTQYF	NA	:::::::::0:-5:9:21:-6:1:28:31:-4:48:::
BM33	50	7	0.0231788	TGTGCCAGCAGCGGTAGTCTAGCGGGGGGCTACGAGCAGTACTTC	EEDEDEEEEEEEEDEEECEEDDEEEEEEEEE?DEEEEEDEEEDEE	TRBV9*00(169.7)	TRBD2*00(40)	TRBJ2-7*00(201.3)		427|440|463|0|13||65.0	20|28|48|18|26||40.0	23|39|67|29|45||80.0		NA	NA	NA	NA	NA	NA	NA	NA	NA	NA	TGTGCCAGCAGCGGTAGTCTAGCGGGGGGCTACGAGCAGTACTTC	30	NA	NA	NA	NA	NA	NA	NA	CASSGSLAGGYEQYF	NA	:::::::::0:-3:13:18:-4:-4:26:29:-3:45:::
BM33	79	6	0.0198676	TGTGCCACCTTAGAGGGTCTAGCGGGAGCTCTGACCCAGTACTTC	EEECBEEEEEEEEEEEEDDCDEDEEEDEEDEDEEDEDEEECEEED	TRBV10-3*00(152.8)	TRBD2*00(54)	TRBJ2-5*00(205)		427|434|464|0|7||35.0	16|30|48|14|28|SA19T|54.0	27|40|68|32|45||65.0		NA	NA	NA	NA	NA	NA	NA	NA	NA	NA	TGTGCCACCTTAGAGGGTCTAGCGGGAGCTCTGACCCAGTACTTC	33	NA	NA	NA	NA	NA	NA	NA	CATLEGLAGALTQYF	NA	:::::::::0:-10:7:14:0:-2:28:32:-7:45:::
BM33	119	5	0.0165563	TGTGCCAGCGTCTGGACGGGCGAAAAACTGTTTTTT	EFEEEEEEEEECEEEEEEEEFEEEDEEFEEBEEEFE	TRBV3-1*00(111.8),TRBV3-2*00(111.8)		TRBJ1-4*00(215)		427|436|464|0|9||45.0;427|436|464|0|9||45.0		28|43|71|21|36||75.0		NA	NA	NA	NA	NA	NA	NA	NA	NA	NA	TGTGCCAGCGTCTGGACGGGCGAAAAACTGTTTTTT	33	NA	NA	NA	NA	NA	NA	NA	CASVWTGEKLFF	NA	:::::::::0:-8:9:::::21:-8:36:::
BM33	120	5	0.0165563	TGTGCCTGGAGTTCAAAAGGGTCCTCTGGAAACACCATATATTTT	EEEEEEEEEEECEEEEEBEEEEEEEEEEEEEEEEEEEEEEEEEEE	TRBV30*00(231)		TRBJ1-3*00(125)	TRBC1*00(380),TRBC2*00(348)	421|433|455|0|12||60.0		20|42|70|23|45||110.0	;	NA	NA	NA	NA	NA	NA	NA	NA	NA	NA	TGTGCCTGGAGTTCAAAAGGGTCCTCTGGAAACACCATATATTTT	33	NA	NA	NA	NA	NA	NA	NA	CAWSSKGSSGNTIYF	NA	:::::::::0:-2:12:::::23:0:45:::
BM33	122	5	0.0165563	TGTGCCAGCAGTGAAGCCCAAGGACTAGCGGGAGGGTGGGGAAGAGAGACCCAGTACTTC	FFFFFFFEEFFEFFEEFFEFFFFEEEEFEEFFFFEFEFFEEFFEFFFEEEFFFFEEFEEF	TRBV6-1*00(331)	TRBD2*00(75)	TRBJ2-5*00(116)		427|444|464|0|17||85.0	17|32|48|21|36||75.0	24|40|68|44|60||80.0		NA	NA	NA	NA	NA	NA	NA	NA	NA	NA	TGTGCCAGCAGTGAAGCCCAAGGACTAGCGGGAGGGTGGGGAAGAGAGACCCAGTACTTC	36	NA	NA	NA	NA	NA	NA	NA	CASSEAQGLAGGWGRETQYF	NA	:::::::::0:0:17:21:-1:0:36:44:-4:60:::
BM33	123	5	0.0165563	TGTGCCAGCAGGGCAACCGGGACAGGGGTTAGCAATCAGCCCCAGCATTTT	FFEFFFEFEEFEFEEEFFEEFFFFFFEFEEEEEEFEFFEEFEFEEEEFEFF	TRBV6-1*00(212.8),TRBV6-5*00(212.8),TRBV6-8*00(212.8),TRBV6-6*00(196.8)	TRBD1*00(60)	TRBJ1-5*00(250)		427|438|464|0|11||55.0;427|438|464|0|11||55.0;424|435|461|0|11||55.0;427|438|464|0|11||55.0	10|22|36|16|28||60.0	20|42|70|29|51||110.0		NA	NA	NA	NA	NA	NA	NA	NA	NA	NA	TGTGCCAGCAGGGCAACCGGGACAGGGGTTAGCAATCAGCCCCAGCATTTT	36	NA	NA	NA	NA	NA	NA	NA	CASRATGTGVSNQPQHF	NA	:::::::::0:-6:11:16:2:-2:28:29:0:51:::
BM33	168	4	0.013245	TGCAGCGTTGGTTGGGGATCCCAAGAGACCCAGTACTTC	AEEEDCDEE=EEDEEDBEDEEDECEE@EDEDEBEEEDEE	TRBV29-1*00(215)		TRBJ2-5*00(235)		421|431|455|0|10||50.0		21|40|68|20|39||95.0		NA	NA	NA	NA	NA	NA	NA	NA	NA	NA	TGCAGCGTTGGTTGGGGATCCCAAGAGACCCAGTACTTC	28	NA	NA	NA	NA	NA	NA	NA	CSVGWGSQETQYF	NA	:::::::::0:-4:10:::::20:-1:39:::
BM33	169	4	0.013245	TGTGCCAGCAGTGAATTGGAGGACGGATATTCACCCCTCCACTTT	EEEDAEEEDEEEEEEEEEEEEEEEEEEEDEEEDEEDEEEEEEEEE	TRBV6-1*00(185),TRBV6-5*00(170),TRBV6-6*00(170),TRBV10-3*00(164),TRBV6-4*00(164)	TRBD2*00(25)	TRBJ1-6*00(225)		427|442|464|0|15||75.0;427|439|464|0|12||60.0;427|439|464|0|12||60.0;427|441|464|0|14|ST434G|54.0;427|441|464|0|14||70.0	26|31|48|17|22||25.0	28|45|73|28|45||85.0		NA	NA	NA	NA	NA	NA	NA	NA	NA	NA	TGTGCCAGCAGTGAATTGGAGGACGGATATTCACCCCTCCACTTT	32	NA	NA	NA	NA	NA	NA	NA	CASSELEDGYSPLHF	NA	:::::::::0:-2:15:17:-10:-1:22:28:-8:45:::
BM33	170	4	0.013245	TGTGCCAGCAGTTCGACTCCCGACTCTGGAAACACCATATATTTT	EEADBCEBEEEEEDDDE;BCEEDDDDEEEEEEEECDEEEEDDD@E	TRBV6-5*00(155),TRBV6-6*00(155),TRBV6-1*00(150)	TRBD2*00(30)	TRBJ1-3*00(250)		427|440|464|0|13||65.0;427|440|464|0|13||65.0;427|439|464|0|12||60.0	2|8|48|16|22||30.0	20|42|70|23|45||110.0		NA	NA	NA	NA	NA	NA	NA	NA	NA	NA	TGTGCCAGCAGTTCGACTCCCGACTCTGGAAACACCATATATTTT	26	NA	NA	NA	NA	NA	NA	NA	CASSSTPDSGNTIYF	NA	:::::::::0:-4:13:16:14:-24:22:23:0:45:::
BM33	171	4	0.013245	TGTGCCAGCAGCGTACAAACTCTAGACTATGGCTACACCTTC	FFEEFFFFFEFEFEEFFFEFFFEFEEFEEFFFFFEEEFFEEF	TRBV9*00(368)		TRBJ1-2*00(225)		427|442|463|0|15||75.0		23|40|68|25|42||85.0		NA	NA	NA	NA	NA	NA	NA	NA	NA	NA	TGTGCCAGCAGCGTACAAACTCTAGACTATGGCTACACCTTC	36	NA	NA	NA	NA	NA	NA	NA	CASSVQTLDYGYTF	NA	:::::::::0:-1:15:::::25:-3:42:::
BM33	224	3	0.00993378	TGTGCCAGCAGTTTCTACAGGGGGAACACTGAAGCTTTCTTT	FEEEEEFEFEFEEEEFEFFEEEEFFEEEEFFEEEEEFFEFEE	TRBV12-3*00(263),TRBV12-4*00(263)	TRBD1*00(35)	TRBJ1-1*00(235)		430|444|467|0|14||70.0;430|444|467|0|14||70.0	15|22|36|16|23||35.0	21|40|68|23|42||95.0		NA	NA	NA	NA	NA	NA	NA	NA	NA	NA	TGTGCCAGCAGTTTCTACAGGGGGAACACTGAAGCTTTCTTT	36	NA	NA	NA	NA	NA	NA	NA	CASSFYRGNTEAFF	NA	:::::::::0:-3:14:16:-3:-2:23:23:-1:42:::
BM33	225	3	0.00993378	TGTGCCAGTAGTGGTCGGGAGGGTCGAGAGACCCAGTACTTC	EEEEEEEEEEEEEEDEEEEEEEEDEEEEEEDEEEEEEDEEEE	TRBV19*00(81)	TRBD2*00(40)	TRBJ2-5*00(220)	TRBC2*00(454),TRBC1*00(399)	427|439|464|0|12||60.0	24|32|48|15|23||40.0	24|40|68|26|42||80.0	;	NA	NA	NA	NA	NA	NA	NA	NA	NA	NA	TGTGCCAGTAGTGGTCGGGAGGGTCGAGAGACCCAGTACTTC	35	NA	NA	NA	NA	NA	NA	NA	CASSGREGRETQYF	NA	:::::::::0:-5:12:15:-8:0:23:26:-4:42:::
BM33	226	3	0.00993378	TGTGCCAGCAGTGAGATGGGCGGGGAGCTGTTTTTT	FEEFEEEFEEEEEEEEEFEFEFFEEEEEEEEFFFEF	TRBV2*00(329)		TRBJ2-2*00(220)		430|444|467|0|14||70.0		27|43|71|20|36||80.0		NA	NA	NA	NA	NA	NA	NA	NA	NA	NA	TGTGCCAGCAGTGAGATGGGCGGGGAGCTGTTTTTT	36	NA	NA	NA	NA	NA	NA	NA	CASSEMGGELFF	NA	:::::::::0:-3:14:::::20:-7:36:::
BM33	227	3	0.00993378	TGTGCCACCAGTGATTTAGCGGGAGGGACAGATACGCAGTATTTT	EEEEEEEEEEEFEEEEEEEEEFEEEEEEEEFEEEEEFFEFEEEEE	TRBV24-1*00(395)	TRBD2*00(50)	TRBJ2-3*00(230)		427|444|465|0|17||85.0	22|32|48|17|27||50.0	23|41|69|27|45||90.0		NA	NA	NA	NA	NA	NA	NA	NA	NA	NA	TGTGCCACCAGTGATTTAGCGGGAGGGACAGATACGCAGTATTTT	36	NA	NA	NA	NA	NA	NA	NA	CATSDLAGGTDTQYF	NA	:::::::::0:-1:17:17:-6:0:27:27:-3:45:::
BM33	230	3	0.00993378	TGTGCCAGCAGTTATCAGGGGGCCACTGAAGCTTTCTTT	FEEEEEEEEFEEEEFFFFEEFFEFEEEFFFEEEFFEFFE	TRBV6-5*00(247),TRBV6-8*00(247),TRBV6-1*00(237),TRBV6-6*00(231),TRBV6-9*00(220)	TRBD1*00(40)	TRBJ1-1*00(220)		427|441|464|0|14||70.0;424|438|461|0|14||70.0;427|439|464|0|12||60.0;427|441|464|0|14||70.0;427|442|464|0|15||75.0	16|24|36|15|23||40.0	24|40|68|23|39||80.0		NA	NA	NA	NA	NA	NA	NA	NA	NA	NA	TGTGCCAGCAGTTATCAGGGGGCCACTGAAGCTTTCTTT	36	NA	NA	NA	NA	NA	NA	NA	CASSYQGATEAFF	NA	:::::::::0:-3:14:15:-4:0:23:23:-4:39:::
BM33	232	3	0.00993378	TGTGCCAGCAGACAGGGGACCCGGGAGACCCAGTACTTC	EEEEEEFEEFFEFEEEEEEFFFEEFEFEEEFEFEEFEFF	TRBV6-1*00(232),TRBV6-5*00(232),TRBV6-8*00(232),TRBV6-6*00(216)	TRBD1*00(35)	TRBJ2-5*00(215)		427|438|464|0|11||55.0;427|438|464|0|11||55.0;424|435|461|0|11||55.0;427|438|464|0|11||55.0	15|22|36|11|18||35.0	25|40|68|24|39||75.0		NA	NA	NA	NA	NA	NA	NA	NA	NA	NA	TGTGCCAGCAGACAGGGGACCCGGGAGACCCAGTACTTC	36	NA	NA	NA	NA	NA	NA	NA	CASRQGTRETQYF	NA	:::::::::0:-6:11:11:-3:-2:18:24:-5:39:::
BM33	233	3	0.00993378	TGTGCCAGCAGCAAACGGGGCGTGATAGATACGCAGTATTTT	EEEDDEEEEEEDEEBDDEEEEEEEEEEDECEEEEBCEEEEEE	TRBV7-3*00(176.3)	TRBD1*00(30)	TRBJ2-3*00(197.3)		430|442|467|0|12||60.0	19|25|36|16|22||30.0	25|41|69|26|42||80.0		NA	NA	NA	NA	NA	NA	NA	NA	NA	NA	TGTGCCAGCAGCAAACGGGGCGTGATAGATACGCAGTATTTT	33	NA	NA	NA	NA	NA	NA	NA	CASSKRGVIDTQYF	NA	:::::::::0:-5:12:16:-7:1:22:26:-5:42:::
BM33	234	3	0.00993378	TGTGCCAGCAGCTTTTCAGGGCTGTCCTACGAGCAGTACTTC	EEEEEEEEEFEEEEEEEEEFEEEEEEEFEEEEEEEEEEEEEE	TRBV7-9*00(369)	TRBD1*00(25),TRBD2*00(25)	TRBJ2-7*00(230)		430|444|467|0|14||70.0	16|21|36|16|21||25.0;28|33|48|17|22||25.0	21|39|67|24|42||90.0		NA	NA	NA	NA	NA	NA	NA	NA	NA	NA	TGTGCCAGCAGCTTTTCAGGGCTGTCCTACGAGCAGTACTTC	36	NA	NA	NA	NA	NA	NA	NA	CASSFSGLSYEQYF	NA	:::::::::0:-3:14:16:-4:-3:21:24:-1:42:::
BM33	278	2	0.00662252	TGTGCCAGCAGTGCGCAGGGAGGCGGTGGAAACACCATATATTTT	DEEDEEEEEEEEECEEDEEEEEEBEDCEEEDEEBBECEEE@EEEE	TRBV2*00(175)	TRBD2*00(30)	TRBJ1-3*00(235)		430|443|467|0|13||65.0	25|31|48|17|23||30.0	23|42|70|26|45||95.0		NA	NA	NA	NA	NA	NA	NA	NA	NA	NA	TGTGCCAGCAGTGCGCAGGGAGGCGGTGGAAACACCATATATTTT	31	NA	NA	NA	NA	NA	NA	NA	CASSAQGGGGNTIYF	NA	:::::::::0:-4:13:17:-9:-1:23:26:-3:45:::
BM33	279	2	0.00662252	TGCAGTGCTAGTTCGGGAGGTGAAGCTTTCTTT	EEEEEEEEEEEEEEEEEEEEEEEEEEEEEEEEE	TRBV20-1*00(104)	TRBD2*00(35)	TRBJ1-1*00(189)	TRBC1*00(386),TRBC2*00(344)	421|432|455|0|11||55.0	24|31|48|13|20||35.0	27|40|68|20|33||65.0	;	NA	NA	NA	NA	NA	NA	NA	NA	NA	NA	TGCAGTGCTAGTTCGGGAGGTGAAGCTTTCTTT	36	NA	NA	NA	NA	NA	NA	NA	CSASSGGEAFF	NA	:::::::::0:-3:11:13:-8:-1:20:20:-7:33:::
BM33	280	2	0.00662252	TGCAGTGCTACCACGATGGTCTTTTTCAGGGCGTATTGGCATACGCAGTATTTT	EEEEEEEEEDEFEEEEEEEEEEEEEEEEEEEEEEEEEEEEEEEEEEEEEEEEEE	TRBV20-1*00(388)	TRBD1*00(25),TRBD2*00(25)	TRBJ2-3*00(210)		421|431|455|0|10||50.0	16|21|36|26|31||25.0;28|33|48|27|32||25.0	27|41|69|40|54||70.0		NA	NA	NA	NA	NA	NA	NA	NA	NA	NA	TGCAGTGCTACCACGATGGTCTTTTTCAGGGCGTATTGGCATACGCAGTATTTT	35	NA	NA	NA	NA	NA	NA	NA	CSATTMVFFRAYWHTQYF	NA	:::::::::0:-4:10:26:-4:-3:31:40:-7:54:::
BM33	281	2	0.00662252	TGCAGTGCTAAAGGACTAGCAGCCTACGAGCAGTACTTC	EEEEEEEEEEFEEEEEEEEEEFEFEEFEEEDEEEDEEED	TRBV20-1*00(299)	TRBD2*00(40)	TRBJ2-7*00(209)	TRBC2*00(65)	421|431|455|0|10||50.0	17|25|48|12|20||40.0	22|39|67|22|39||85.0		NA	NA	NA	NA	NA	NA	NA	NA	NA	NA	TGCAGTGCTAAAGGACTAGCAGCCTACGAGCAGTACTTC	35	NA	NA	NA	NA	NA	NA	NA	CSAKGLAAYEQYF	NA	:::::::::0:-4:10:12:-1:-7:20:22:-2:39:::
BM33	282	2	0.00662252	TGTGCCTGGGAGGGACAGGGTGAAGGCTACACCTTC	EEEEDEEEEEEEEEEEEEEEEEEEEEEEDEEEEEEE	TRBV30*00(536)	TRBD1*00(45)	TRBJ1-2*00(200)		421|430|455|0|9||45.0	12|21|36|11|20||45.0	28|40|68|24|36||60.0		NA	NA	NA	NA	NA	NA	NA	NA	NA	NA	TGTGCCTGGGAGGGACAGGGTGAAGGCTACACCTTC	35	NA	NA	NA	NA	NA	NA	NA	CAWEGQGEGYTF	NA	:::::::::0:-5:9:11:0:-3:20:24:-8:36:::
BM33	283	2	0.00662252	TGTGCCAGCAGCCGGGGGGGGCCCTTATCCCATCAGCCCCAGCATTTT	EEEEEEEEEEEEEEEEEEEEFEEEEDEEEFEEEDEEEEEEEEEEEEEE	TRBV5-6*00(180),TRBV5-5*00(164)	TRBD2*00(39),TRBD1*00(34)	TRBJ1-5*00(225)		427|439|463|0|12||60.0;427|439|463|0|12||60.0	25|36|48|14|25|SA28G|39.0;18|28|36|14|24|SC23G|34.0	25|42|70|31|48||85.0		NA	NA	NA	NA	NA	NA	NA	NA	NA	NA	TGTGCCAGCAGCCGGGGGGGGCCCTTATCCCATCAGCCCCAGCATTTT	35	NA	NA	NA	NA	NA	NA	NA	CASSRGGPLSHQPQHF	NA	:::::::::0:-4:12:14:-9:4:25:31:-5:48:::
BM33	284	2	0.00662252	TGTGCCAGCAGTTACATGGGGGGCCTATCCTATGGCTACACCTTC	EEEEEEFEEEEEEEEEEEEEEFEEEFEEEEEEEEEEEDEEEFEEE	TRBV6-2*00(252),TRBV6-3*00(252)	TRBD1*00(30)	TRBJ1-2*00(220)		427|442|464|0|15||75.0;427|442|464|0|15||75.0	18|24|36|18|24||30.0	24|40|68|29|45||80.0		NA	NA	NA	NA	NA	NA	NA	NA	NA	NA	TGTGCCAGCAGTTACATGGGGGGCCTATCCTATGGCTACACCTTC	35	NA	NA	NA	NA	NA	NA	NA	CASSYMGGLSYGYTF	NA	:::::::::0:-2:15:18:-6:0:24:29:-4:45:::
BM33	285	2	0.00662252	TGTGCCAGCAGTTTGTGGACAGGGGAGGGGACCGGGGAGCTGTTTTTT	FEFFEEEEEEEEEFEEFEEFEEFEFEFEEEEEEFEFEEEEEFEEFEEF	TRBV6-2*00(258),TRBV6-3*00(258)	TRBD1*00(45)	TRBJ2-2*00(214)		427|440|464|0|13||65.0;427|440|464|0|13||65.0	13|22|36|16|25||45.0	25|43|71|30|48||90.0		NA	NA	NA	NA	NA	NA	NA	NA	NA	NA	TGTGCCAGCAGTTTGTGGACAGGGGAGGGGACCGGGGAGCTGTTTTTT	36	NA	NA	NA	NA	NA	NA	NA	CASSLWTGEGTGELFF	NA	:::::::::0:-4:13:16:-1:-2:25:30:-5:48:::
BM33	286	2	0.00662252	TGTGCCAGCAGCTTAATTGGGGGCGGGACTGAAGCTTTCTTT	EEEEEFEEEEEEEEEFEEEEEEEEEFEEFEEEFEEEEEEEEE	TRBV7-3*00(369)	TRBD1*00(35)	TRBJ1-1*00(215)		430|446|467|0|16||80.0	18|25|36|18|25||35.0	25|40|68|27|42||75.0		NA	NA	NA	NA	NA	NA	NA	NA	NA	NA	TGTGCCAGCAGCTTAATTGGGGGCGGGACTGAAGCTTTCTTT	36	NA	NA	NA	NA	NA	NA	NA	CASSLIGGGTEAFF	NA	:::::::::0:-1:16:18:-6:1:25:27:-5:42:::
BM33	287	2	0.00662252	TGTGCCAGCAGCCCCATACAGGGGGCGGGAAATGAGCAGTTCTTC	EEEDEEBEEEBDDDEEEDBEEEEEE?EEEEEDDEDEDDEE>DDAD	TRBV11-1*00(134),TRBV7-3*00(134),TRBV7-7*00(134),TRBV7-9*00(134)	TRBD1*00(50)	TRBJ2-1*00(215)		430|442|467|0|12||60.0;430|442|467|0|12||60.0;430|442|467|0|12||60.0;430|442|467|0|12||60.0	15|25|36|17|27||50.0	27|42|70|30|45||75.0		NA	NA	NA	NA	NA	NA	NA	NA	NA	NA	TGTGCCAGCAGCCCCATACAGGGGGCGGGAAATGAGCAGTTCTTC	29	NA	NA	NA	NA	NA	NA	NA	CASSPIQGAGNEQFF	NA	:::::::::0:-5:12:17:-3:1:27:30:-7:45:::
BM33	317	1	0.00331126	TGCGCCAGCACCGCAACTGGAAGTGGCACTGAAGCTTTCTTT	EEDDEDAAE:EEDEE;DBEEDE>E>CD>ECDCDDDEBDB<DE	TRBV10-2*00(175)		TRBJ1-1*00(140)		427|437|464|0|10||50.0		24|40|68|26|42||80.0		NA	NA	NA	NA	NA	NA	NA	NA	NA	NA	TGCGCCAGCACCGCAACTGGAAGTGGCACTGAAGCTTTCTTT	25	NA	NA	NA	NA	NA	NA	NA	CASTATGSGTEAFF	NA	:::::::::0:-7:10:::::26:-4:42:::
BM33	319	1	0.00331126	TGTGCCAGCAGCTTAGACAGCTCCTACGAGCAGTACTTC	EBEEEDDCEEDDCED6CCCAEDCEBDCCCCEDAE<ECDD	TRBV11-3*00(225),TRBV11-1*00(204)		TRBJ2-7*00(165)		430|447|467|0|17||85.0;430|446|467|0|16||80.0		18|39|67|18|39||105.0		NA	NA	NA	NA	NA	NA	NA	NA	NA	NA	TGTGCCAGCAGCTTAGACAGCTCCTACGAGCAGTACTTC	21	NA	NA	NA	NA	NA	NA	NA	CASSLDSSYEQYF	NA	:::::::::0:0:17:::::18:2:39:::
BM33	320	1	0.00331126	TGTGCCAGCAGTTTAAAGGGGTCCTATGGCTACACCTTC	EEEDEEEEEEEEEEEEEE?DDDDEBDECECEDDED9EED	TRBV12-3*00(215),TRBV12-4*00(215)	TRBD1*00(25)	TRBJ1-2*00(220)		430|445|467|0|15||75.0;430|445|467|0|15||75.0	17|22|36|16|21||25.0	24|40|68|23|39||80.0		NA	NA	NA	NA	NA	NA	NA	NA	NA	NA	TGTGCCAGCAGTTTAAAGGGGTCCTATGGCTACACCTTC	24	NA	NA	NA	NA	NA	NA	NA	CASSLKGSYGYTF	NA	:::::::::0:-2:15:16:-5:-2:21:23:-4:39:::
BM33	321	1	0.00331126	TGTGCCAGCAGTTTTTCAGGGCGTATAAGAAATGGCTACACCTTC	FEEEDEEEEEEEEEEEEEEEEEEEEEEEEEEEEDEDEDEEEEEEE	TRBV12-3*00(180),TRBV12-4*00(180)	TRBD1*00(25),TRBD2*00(25)	TRBJ1-2*00(210)		430|444|467|0|14||70.0;430|444|467|0|14||70.0	16|21|36|16|21||25.0;28|33|48|17|22||25.0	26|40|68|31|45||70.0		NA	NA	NA	NA	NA	NA	NA	NA	NA	NA	TGTGCCAGCAGTTTTTCAGGGCGTATAAGAAATGGCTACACCTTC	35	NA	NA	NA	NA	NA	NA	NA	CASSFSGRIRNGYTF	NA	:::::::::0:-3:14:16:-4:-3:21:31:-6:45:::
BM33	322	1	0.00331126	TGTGCCAGTAAGGACGCGAAAAGAAACACCATATATTTT	EEEEDCDED@DDECAEEEEEDDDD=EEBBEDEEDDDDEE	TRBV12-3*00(180),TRBV12-4*00(180)		TRBJ1-3*00(225)		430|438|467|0|8||40.0;430|438|467|0|8||40.0		25|42|70|22|39||85.0		NA	NA	NA	NA	NA	NA	NA	NA	NA	NA	TGTGCCAGTAAGGACGCGAAAAGAAACACCATATATTTT	28	NA	NA	NA	NA	NA	NA	NA	CASKDAKRNTIYF	NA	:::::::::0:-9:8:::::22:-5:39:::
BM33	324	1	0.00331126	TGTGCCAGCAGTCGGACCGACAATGAGCAGTTCTTC	EEEEFEFEEEEEEEEEEEEEFEEEEEEEEEEEEEEE	TRBV12-3*00(253),TRBV12-4*00(253)		TRBJ2-1*00(225)		430|442|467|0|12||60.0;430|442|467|0|12||60.0		25|42|70|19|36||85.0		NA	NA	NA	NA	NA	NA	NA	NA	NA	NA	TGTGCCAGCAGTCGGACCGACAATGAGCAGTTCTTC	36	NA	NA	NA	NA	NA	NA	NA	CASSRTDNEQFF	NA	:::::::::0:-5:12:::::19:-5:36:::
BM33	325	1	0.00331126	TGTGCCAGCAGCCACTACCCGGGACAGGGGGTTGATGAGCAGTTCTTC	D7EBEAB;DAECDBBC8@@@E?D=DCEAE?E@ECDBE:CDCD>?BD@B	TRBV12-3*00(114),TRBV12-4*00(114)	TRBD1*00(70)	TRBJ2-1*00(210)		430|441|467|0|11||55.0;430|441|467|0|11||55.0	9|23|36|17|31||70.0	28|42|70|34|48||70.0		NA	NA	NA	NA	NA	NA	NA	NA	NA	NA	TGTGCCAGCAGCCACTACCCGGGACAGGGGGTTGATGAGCAGTTCTTC	22	NA	NA	NA	NA	NA	NA	NA	CASSHYPGQGVDEQFF	NA	:::::::::0:-6:11:17:3:-1:31:34:-8:48:::
BM33	326	1	0.00331126	TGTGCCAGCAGTCTAGAGGGGACAGATACGCAGTATTTT	EEEEEEEEEEEDDEEEDEEBEAEEEDCDEEEEEDEEEEE	TRBV12-3*00(257),TRBV12-4*00(257)	TRBD1*00(25)	TRBJ2-3*00(230)		430|446|467|0|16|ST442C|64.0;430|446|467|0|16|ST442C|64.0	17|22|36|16|21||25.0	23|41|69|21|39||90.0		NA	NA	NA	NA	NA	NA	NA	NA	NA	NA	TGTGCCAGCAGTCTAGAGGGGACAGATACGCAGTATTTT	32	NA	NA	NA	NA	NA	NA	NA	CASSLEGTDTQYF	NA	:::::::::0:-1:16:16:-5:-2:21:21:-3:39:::
BM33	328	1	0.00331126	TGTGCCAGCAGCTTAGAGGTTAACACTGAAGCTTTCTTT	D=D@8>=CCAB@CDDCCEDD;EDD8@EEEE<CD=C>BAE	TRBV13*00(220)		TRBJ1-1*00(230)		457|473|494|0|16||80.0		22|40|68|21|39||90.0		NA	NA	NA	NA	NA	NA	NA	NA	NA	NA	TGTGCCAGCAGCTTAGAGGTTAACACTGAAGCTTTCTTT	23	NA	NA	NA	NA	NA	NA	NA	CASSLEVNTEAFF	NA	:::::::::0:-1:16:::::21:-2:39:::
BM33	329	1	0.00331126	TGTGCCAGCAGCCCGGGTCGAGATACGCAGTATTTT	ECEEEEEEEEEEDEEEE=CEEEEE8EEDEDCEEDDD	TRBV14*00(205)		TRBJ2-3*00(220)		430|443|467|0|13||65.0		25|41|69|20|36||80.0		NA	NA	NA	NA	NA	NA	NA	NA	NA	NA	TGTGCCAGCAGCCCGGGTCGAGATACGCAGTATTTT	23	NA	NA	NA	NA	NA	NA	NA	CASSPGRDTQYF	NA	:::::::::0:-4:13:::::20:-5:36:::
BM33	331	1	0.00331126	TGTGCCAGCTCACCTGGCAGACACACTGAAGCTTTCTTT	EEEEFFECEEFBEEEEEEEEEEEEEEEFEEEEEEEEEFD	TRBV18*00(604)		TRBJ1-1*00(225)		430|444|467|0|14||70.0		23|40|68|22|39||85.0		NA	NA	NA	NA	NA	NA	NA	NA	NA	NA	TGTGCCAGCTCACCTGGCAGACACACTGAAGCTTTCTTT	33	NA	NA	NA	NA	NA	NA	NA	CASSPGRHTEAFF	NA	:::::::::0:-3:14:::::22:-3:39:::
BM33	332	1	0.00331126	TGTGCCAGTAGTATAATGGGCCGGAACACTGAAGCTTTCTTT	EEDEEEDEDECDDEE9EDEC?DAEEBEDEEEEEEEDEDEEED	TRBV19*00(200)	TRBD2*00(25)	TRBJ1-1*00(235)		427|442|464|0|15||75.0	29|34|48|17|22||25.0	21|40|68|23|42||95.0		NA	NA	NA	NA	NA	NA	NA	NA	NA	NA	TGTGCCAGTAGTATAATGGGCCGGAACACTGAAGCTTTCTTT	24	NA	NA	NA	NA	NA	NA	NA	CASSIMGRNTEAFF	NA	:::::::::0:-2:15:17:-13:2:22:23:-1:42:::
BM33	333	1	0.00331126	TGTGCCAGTAGTACCTACAGGGGAACTAATGAAAAACTGTTTTTT	EEEEEEFFCEEEDEFEEFEEEFEFEEEFFEFFEFEEEEEFFEEEE	TRBV19*00(329)	TRBD1*00(35)	TRBJ1-4*00(240)		427|440|464|0|13||65.0	15|22|36|16|23||35.0	21|43|71|23|45||110.0		NA	NA	NA	NA	NA	NA	NA	NA	NA	NA	TGTGCCAGTAGTACCTACAGGGGAACTAATGAAAAACTGTTTTTT	34	NA	NA	NA	NA	NA	NA	NA	CASSTYRGTNEKLFF	NA	:::::::::0:-4:13:16:-3:-2:23:23:-1:45:::
BM33	334	1	0.00331126	TGTGCCAGTAGTAGAGGGGCGAGGGATCAGCCCCAGCATTTT	E8ABBEEBBBB:ECDEDDDEEDD?E;DDDCE<=EEDCECDEE	TRBV19*00(174)	TRBD1*00(30)	TRBJ1-5*00(225)		427|440|464|0|13||65.0	19|25|36|15|21||30.0	25|42|70|25|42||85.0		NA	NA	NA	NA	NA	NA	NA	NA	NA	NA	TGTGCCAGTAGTAGAGGGGCGAGGGATCAGCCCCAGCATTTT	23	NA	NA	NA	NA	NA	NA	NA	CASSRGARDQPQHF	NA	:::::::::0:-4:13:15:-7:1:21:25:-5:42:::
BM33	338	1	0.00331126	TGTGCCAGCAGTTCAACGTCCGGCGGACAGGGCACTGAAGCTTTCTTT	@E6EDBBEDBEE9@CBED<EEEEBEECEEEEDEAEDEBC@EDDBEAEE	TRBV2*00(155)	TRBD1*00(40)	TRBJ1-1*00(220)		430|442|467|0|12||60.0	13|21|36|24|32||40.0	24|40|68|32|48||80.0		NA	NA	NA	NA	NA	NA	NA	NA	NA	NA	TGTGCCAGCAGTTCAACGTCCGGCGGACAGGGCACTGAAGCTTTCTTT	21	NA	NA	NA	NA	NA	NA	NA	CASSSTSGGQGTEAFF	NA	:::::::::0:-5:12:24:-1:-3:32:32:-4:48:::
BM33	339	1	0.00331126	TGTGCCAGCAGGATGAGGGTATACAATGAGCAGTTCTTC	AEBE<DEE9EEEECECECEDAE?EEDECEEDECEDED>B	TRBV2*00(170)	TRBD2*00(25)	TRBJ2-1*00(230)		430|441|467|0|11||55.0	27|32|48|14|19||25.0	24|42|70|21|39||90.0		NA	NA	NA	NA	NA	NA	NA	NA	NA	NA	TGTGCCAGCAGGATGAGGGTATACAATGAGCAGTTCTTC	24	NA	NA	NA	NA	NA	NA	NA	CASRMRVYNEQFF	NA	:::::::::0:-6:11:14:-11:0:19:21:-4:39:::
BM33	340	1	0.00331126	TGTGCCAGCAGTGAAGCGCTTGGCAGGGCCTACGAGCAGTACTTC	EEEEEEEEEEEEDEECDEEDDEEEEEEEEEECEEEEEEEEDEEED	TRBV2*00(215)	TRBD1*00(25)	TRBJ2-7*00(225)		430|451|467|0|21||105.0	16|21|36|23|28||25.0	22|39|67|28|45||85.0		NA	NA	NA	NA	NA	NA	NA	NA	NA	NA	TGTGCCAGCAGTGAAGCGCTTGGCAGGGCCTACGAGCAGTACTTC	34	NA	NA	NA	NA	NA	NA	NA	CASSEALGRAYEQYF	NA	:::::::::0:4:21:23:-4:-3:28:28:-2:45:::
BM33	341	1	0.00331126	TGCAGTGCTAGCGGCTACACCTTC	DBC;EDDB?DDBEE9B9EE<6EEE	TRBV20-1*00(270)		TRBJ1-2*00(200)		421|432|455|0|11||55.0		28|40|68|12|24||60.0		NA	NA	NA	NA	NA	NA	NA	NA	NA	NA	TGCAGTGCTAGCGGCTACACCTTC	21	NA	NA	NA	NA	NA	NA	NA	CSASGYTF	NA	:::::::::0:-3:11:::::12:-8:24:::
BM33	342	1	0.00331126	TGCAGTGCTAGAGATCTGCCCAGGTCCCTCTATGGCTACACCTTC	FFEEEEEEEEEFEEEEEECEEEEEEEED?EEEEEEDE6EEEEEEE	TRBV20-1*00(423)	TRBD1*00(25),TRBD2*00(25)	TRBJ1-2*00(220)		421|438|455|0|17||85.0	7|12|36|23|28||25.0;11|16|48|23|28||25.0	24|40|68|29|45||80.0		NA	NA	NA	NA	NA	NA	NA	NA	NA	NA	TGCAGTGCTAGAGATCTGCCCAGGTCCCTCTATGGCTACACCTTC	21	NA	NA	NA	NA	NA	NA	NA	CSARDLPRSLYGYTF	NA	:::::::::0:3:17:23:5:-12:28:29:-4:45:::
BM33	344	1	0.00331126	TGCAGTGCTAGCGGGGGGGCAGATACGCAGTATTTT	EDD7CBBDE7CEEEEDEEEDEEEEDCDAEEEDEDEE	TRBV20-1*00(195)	TRBD1*00(25)	TRBJ2-3*00(225)		421|432|455|0|11||55.0	18|23|36|12|17||25.0	24|41|69|19|36||85.0		NA	NA	NA	NA	NA	NA	NA	NA	NA	NA	TGCAGTGCTAGCGGGGGGGCAGATACGCAGTATTTT	22	NA	NA	NA	NA	NA	NA	NA	CSASGGADTQYF	NA	:::::::::0:-3:11:12:-6:-1:17:19:-4:36:::
BM33	345	1	0.00331126	TGTGCCAGCAGGTCTCGGCACCTGAACACTGAAGCTTTCTTT	EEEEDDEECDCEDE:DECDCEDEEADEDEDEEEACE<EEEDE	TRBV28*00(180)		TRBJ1-1*00(240)		427|438|464|0|11||55.0		20|40|68|22|42||100.0		NA	NA	NA	NA	NA	NA	NA	NA	NA	NA	TGTGCCAGCAGGTCTCGGCACCTGAACACTGAAGCTTTCTTT	25	NA	NA	NA	NA	NA	NA	NA	CASRSRHLNTEAFF	NA	:::::::::0:-6:11:::::22:0:42:::
BM33	346	1	0.00331126	TGTGCCACCGTCTTTACAGGGGAAAATGAAAAACTGTTTTTT	EEDDEEEDDEEEEDDEDEEEEDEEEECEEEEEEEEEEEDEEE	TRBV28*00(195)	TRBD1*00(35)	TRBJ1-4*00(220)		427|434|464|0|7||35.0	15|22|36|15|22||35.0	25|43|71|24|42||90.0		NA	NA	NA	NA	NA	NA	NA	NA	NA	NA	TGTGCCACCGTCTTTACAGGGGAAAATGAAAAACTGTTTTTT	34	NA	NA	NA	NA	NA	NA	NA	CATVFTGENEKLFF	NA	:::::::::0:-10:7:15:-3:-2:22:24:-5:42:::
BM33	347	1	0.00331126	TGTGCCAGCAGTTTCCCCGGGACAGGGAATTCACCCCTCCACTTT	EEDDB7DDDD@DDCDC?DECE9EEBEEECDEECDB@EDE@CBEEE	TRBV28*00(180)	TRBD1*00(60)	TRBJ1-6*00(230)		427|441|464|0|14||70.0	9|21|36|15|27||60.0	27|45|73|27|45||90.0		NA	NA	NA	NA	NA	NA	NA	NA	NA	NA	TGTGCCAGCAGTTTCCCCGGGACAGGGAATTCACCCCTCCACTTT	22	NA	NA	NA	NA	NA	NA	NA	CASSFPGTGNSPLHF	NA	:::::::::0:-3:14:15:3:-3:27:27:-7:45:::
BM33	348	1	0.00331126	TGTGCCAGCAGCTCACACGGTCCAGAGTATAATTCACCCCTCCACTTT	EEEDD<EEAC?D@E@C7@ECD<CD>EEEDDC@@ED?C@A@=DDACCCC	TRBV28*00(145)		TRBJ1-6*00(229)		427|438|464|0|11||55.0		24|45|73|27|48||105.0		NA	NA	NA	NA	NA	NA	NA	NA	NA	NA	TGTGCCAGCAGCTCACACGGTCCAGAGTATAATTCACCCCTCCACTTT	22	NA	NA	NA	NA	NA	NA	NA	CASSSHGPEYNSPLHF	NA	:::::::::0:-6:11:::::27:-4:48:::
BM33	349	1	0.00331126	TGTGCCAGCAGTTTTGGGGAAGAAGGTGAGCAGTTCTTC										NA	NA	NA	NA	NA	NA	NA	NA	NA	NA		NA	NA	NA	NA	NA	NA	NA	NA		NA
BM33	351	1	0.00331126	TGCAGCGCCCGACAGGGCGCGAACACTGAAGCTTTCTTT	EDEEEEEEEEEEFEEECEEEEEEEEEEEEEEEEEFEEFD	TRBV29-1*00(258)	TRBD1*00(35)	TRBJ1-1*00(235)		421|428|455|0|7||35.0	14|21|36|10|17||35.0	21|40|68|20|39||95.0		NA	NA	NA	NA	NA	NA	NA	NA	NA	NA	TGCAGCGCCCGACAGGGCGCGAACACTGAAGCTTTCTTT	34	NA	NA	NA	NA	NA	NA	NA	CSARQGANTEAFF	NA	:::::::::0:-7:7:10:-2:-3:17:20:-1:39:::
BM33	353	1	0.00331126	TGCAGCGTTGAGGAGAACGCGAACACCGGGGAGCTGTTTTTT	DED?CAEB>E?EEEEE=EDED@@;@DEEEEDEE;DDCBEDEE	TRBV29-1*00(180)		TRBJ2-2*00(265)		421|432|455|0|11||55.0		18|43|71|17|42||125.0		NA	NA	NA	NA	NA	NA	NA	NA	NA	NA	TGCAGCGTTGAGGAGAACGCGAACACCGGGGAGCTGTTTTTT	26	NA	NA	NA	NA	NA	NA	NA	CSVEENANTGELFF	NA	:::::::::0:-3:11:::::17:2:42:::
BM33	354	1	0.00331126	TGCAGCGTTGAAGGGACAGGGGGAATCTACGAGCAGTACTTC	EEAD@BC=AEEBDEE>DDEE@DED@D@D6DEBEDEDE?CDBE	TRBV29-1*00(190)	TRBD1*00(50)	TRBJ2-7*00(220)		421|434|455|0|13||65.0	13|23|36|13|23||50.0	23|39|67|26|42||80.0		NA	NA	NA	NA	NA	NA	NA	NA	NA	NA	TGCAGCGTTGAAGGGACAGGGGGAATCTACGAGCAGTACTTC	21	NA	NA	NA	NA	NA	NA	NA	CSVEGTGGIYEQYF	NA	:::::::::0:-1:13:13:-1:-1:23:26:-3:42:::
BM33	355	1	0.00331126	TGTGCCAGCAGTGTTGTAGGATCCTACAATGAGCAGTTCTTC	EEC:ADCDC?BEEBDE?E?BD>AE>:BA@DEDEDEBDC8DAC	TRBV6-1*00(170),TRBV6-5*00(165),TRBV6-6*00(165),TRBV10-3*00(154),TRBV6-4*00(154)		TRBJ2-1*00(245)		427|440|464|0|13||65.0;427|439|464|0|12||60.0;427|439|464|0|12||60.0;427|440|464|0|13|ST434G|49.0;427|440|464|0|13||65.0		21|42|70|21|42||105.0		NA	NA	NA	NA	NA	NA	NA	NA	NA	NA	TGTGCCAGCAGTGTTGTAGGATCCTACAATGAGCAGTTCTTC	23	NA	NA	NA	NA	NA	NA	NA	CASSVVGSYNEQFF	NA	:::::::::0:-4:13:::::21:-1:42:::
BM33	356	1	0.00331126	TGTGCCAGCAGTTACTCGAGCCTAGCGGGGTACTACGAGCAGTACTTC	EEFD;EEC?EEEEAEEECEEEEEEEEEEEEDEEEEEEEEEFEEEEEEE	TRBV6-2*00(545),TRBV6-3*00(545)	TRBD2*00(40)	TRBJ2-7*00(172)		427|447|464|0|20||100.0;427|447|464|0|20||100.0	20|28|48|21|29||40.0	23|39|67|32|48||80.0		NA	NA	NA	NA	NA	NA	NA	NA	NA	NA	TGTGCCAGCAGTTACTCGAGCCTAGCGGGGTACTACGAGCAGTACTTC	26	NA	NA	NA	NA	NA	NA	NA	CASSYSSLAGYYEQYF	NA	:::::::::0:3:20:21:-4:-4:29:32:-3:48:::
BM33	357	1	0.00331126	TGTGCCAGCAGTGACATGGGGCAGGGGGTGGGTGCTTTCTTT	?8E>C@BD?;CEEAD@EEEEDD<EDEBEDDCCB:@BCCBDEE	TRBV6-4*00(184),TRBV6-1*00(163)	TRBD1*00(39)	TRBJ1-1*00(185)		427|442|464|0|15||75.0;427|441|464|0|14||70.0	12|23|36|17|28|SA15G|39.0	31|40|68|33|42||45.0		NA	NA	NA	NA	NA	NA	NA	NA	NA	NA	TGTGCCAGCAGTGACATGGGGCAGGGGGTGGGTGCTTTCTTT	23	NA	NA	NA	NA	NA	NA	NA	CASSDMGQGVGAFF	NA	:::::::::0:-2:15:17:0:-1:28:33:-11:42:::
BM33	358	1	0.00331126	TGTGCCAGCAGTGATGGGGGCTCCACAGATACGCAGTATTTT	ADECD@EE;DCEEDBCEE>DA>@;?EDDAAAED>DEE@EDEE	TRBV6-4*00(180),TRBV6-1*00(164)	TRBD1*00(30)	TRBJ2-3*00(235)		427|441|464|0|14||70.0;427|441|464|0|14||70.0	18|24|36|15|21||30.0	22|41|69|23|42||95.0		NA	NA	NA	NA	NA	NA	NA	NA	NA	NA	TGTGCCAGCAGTGATGGGGGCTCCACAGATACGCAGTATTTT	26	NA	NA	NA	NA	NA	NA	NA	CASSDGGSTDTQYF	NA	:::::::::0:-3:14:15:-6:0:21:23:-2:42:::
BM33	360	1	0.00331126	TGTGCCAGCAGTTACCAGTTTGGCGGGGATACAGATACGCAGTATTTT	EDCEDEECDDEED8DEECED>DDEECDDC8BEDD;CBE8EBCE;D?DE	TRBV6-5*00(155),TRBV6-6*00(155),TRBV6-1*00(140),TRBV6-4*00(140),TRBV6-2*00(139)	TRBD2*00(25)	TRBJ2-3*00(230)		427|442|464|0|15||75.0;427|442|464|0|15||75.0;427|439|464|0|12||60.0;427|439|464|0|12||60.0;427|442|464|0|15||75.0	23|28|48|22|27||25.0	23|41|69|30|48||90.0		NA	NA	NA	NA	NA	NA	NA	NA	NA	NA	TGTGCCAGCAGTTACCAGTTTGGCGGGGATACAGATACGCAGTATTTT	23	NA	NA	NA	NA	NA	NA	NA	CASSYQFGGDTDTQYF	NA	:::::::::0:-2:15:22:-7:-4:27:30:-3:48:::
BM33	361	1	0.00331126	TGTGCCAGCAGAGACAGATTCTATGAGCAGTACTTC	:E:DE<EDEDEEEDCEEEADEADDEEE>DC8BEDDE	TRBV6-1*00(210),TRBV6-5*00(210),TRBV6-6*00(210),TRBV6-2*00(194),TRBV6-3*00(194)	TRBD1*00(25)	TRBJ2-7*00(188)		427|438|464|0|11||55.0;427|438|464|0|11||55.0;427|438|464|0|11||55.0;427|438|464|0|11||55.0;427|438|464|0|11||55.0	14|19|36|12|17||25.0	23|39|67|20|36|SC26T|64.0		NA	NA	NA	NA	NA	NA	NA	NA	NA	NA	TGTGCCAGCAGAGACAGATTCTATGAGCAGTACTTC	23	NA	NA	NA	NA	NA	NA	NA	CASRDRFYEQYF	NA	:::::::::0:-6:11:12:-2:-5:17:20:-3:36:::
BM33	362	1	0.00331126	TGTGCCAGCAGCTCCTTGGGGGTTGAGCAGTTCTTC	EEEEEEEEEEEEDEEEEEEEEEEDEEEEDEEDEEEE	TRBV7-2*00(200),TRBV7-8*00(184)	TRBD1*00(25)	TRBJ2-1*00(205)		430|443|467|0|13||65.0;430|443|467|0|13||65.0	18|23|36|17|22||25.0	29|42|70|23|36||65.0		NA	NA	NA	NA	NA	NA	NA	NA	NA	NA	TGTGCCAGCAGCTCCTTGGGGGTTGAGCAGTTCTTC	35	NA	NA	NA	NA	NA	NA	NA	CASSSLGVEQFF	NA	:::::::::0:-4:13:17:-6:-1:22:23:-9:36:::
BM33	363	1	0.00331126	TGTGCCAGCAGCCAAACAGGGGGCACCATATATTTT	>ECA?DB;:BBDCCBCCC@AC=CCC@ED@EDBCDEB	TRBV7-7*00(215),TRBV7-6*00(199)	TRBD1*00(40)	TRBJ1-3*00(205)		430|442|467|0|12||60.0;430|442|467|0|12||60.0	15|23|36|15|23||40.0	29|42|70|23|36||65.0		NA	NA	NA	NA	NA	NA	NA	NA	NA	NA	TGTGCCAGCAGCCAAACAGGGGGCACCATATATTTT	25	NA	NA	NA	NA	NA	NA	NA	CASSQTGGTIYF	NA	:::::::::0:-5:12:15:-3:-1:23:23:-9:36:::
BM33	364	1	0.00331126	TGTGCCAGCAGCTTAGAAAGGGGCAATCAGCCCCAGCATTTT	EDEE<EC=ECECCEEAEADE<E=EC>?B@EEEDEEADDBCAE	TRBV7-8*00(205),TRBV7-2*00(189)		TRBJ1-5*00(240)		430|446|467|0|16||80.0;430|446|467|0|16||80.0		22|42|70|22|42||100.0		NA	NA	NA	NA	NA	NA	NA	NA	NA	NA	TGTGCCAGCAGCTTAGAAAGGGGCAATCAGCCCCAGCATTTT	27	NA	NA	NA	NA	NA	NA	NA	CASSLERGNQPQHF	NA	:::::::::0:-1:16:::::22:-2:42:::
BM33	366	1	0.00331126	TGTGCCAGCAGCTTAAATAGCGGCTCCTACGAGCAGTACTTC	EBEDDDEEEECEEEEEEDEDEDEEEEECEDEEDEEDE>ECEE	TRBV7-8*00(200),TRBV7-2*00(184)	TRBD2*00(25)	TRBJ2-7*00(160)		430|445|467|0|15||75.0;430|445|467|0|15||75.0	21|26|48|17|22||25.0	19|39|67|22|42||100.0		NA	NA	NA	NA	NA	NA	NA	NA	NA	NA	TGTGCCAGCAGCTTAAATAGCGGCTCCTACGAGCAGTACTTC	29	NA	NA	NA	NA	NA	NA	NA	CASSLNSGSYEQYF	NA	:::::::::0:-2:15:17:-5:-6:22:22:1:42:::
BM33	367	1	0.00331126	TGTGCCAGCAGCTTAGCAGGAATTAACACTGAAGCTTTCTTT	@6?@@@=C6BBCBCD>B88D@>CCC@?=>BCA>7;DBAD=CD	TRBV7-9*00(210)		TRBJ1-1*00(230)		430|447|467|0|17||85.0		22|40|68|24|42||90.0		NA	NA	NA	NA	NA	NA	NA	NA	NA	NA	TGTGCCAGCAGCTTAGCAGGAATTAACACTGAAGCTTTCTTT	21	NA	NA	NA	NA	NA	NA	NA	CASSLAGINTEAFF	NA	:::::::::0:0:17:::::24:-2:42:::
BM33	368	1	0.00331126	TGTGCCAGCAGCGCGGAGGGCTATAATTCACCCCTCCACTTT	DDD6BD@=E?=BD;AB<AD@D>@==8D@EB?9??C;E6D<D@	TRBV9*00(190)	TRBD2*00(30)	TRBJ1-6*00(250)		427|440|463|0|13||65.0	26|32|48|14|20||30.0	23|45|73|20|42||110.0		NA	NA	NA	NA	NA	NA	NA	NA	NA	NA	TGTGCCAGCAGCGCGGAGGGCTATAATTCACCCCTCCACTTT	21	NA	NA	NA	NA	NA	NA	NA	CASSAEGYNSPLHF	NA	:::::::::0:-3:13:14:-10:0:20:20:-3:42:::
BM33	369	1	0.00331126	TGTGCCAGCAGCGTCCCGAACACCGGGGAGCTGTTTTTT	EEDEDDC@EEEDED@E@EEDDEEAEEEEECEEEEC8E=C	TRBV9*00(210)		TRBJ2-2*00(239)		427|441|463|0|14||70.0		20|43|71|16|39||115.0		NA	NA	NA	NA	NA	NA	NA	NA	NA	NA	TGTGCCAGCAGCGTCCCGAACACCGGGGAGCTGTTTTTT	23	NA	NA	NA	NA	NA	NA	NA	CASSVPNTGELFF	NA	:::::::::0:-2:14:::::16:0:39:::
BM34	45	7	0.25	TGTGCCAGCTTTCCATCTTTCGACAGGGGAAGCGAGCAGTACTTC	FFEEEFEEFEFFFFEFFFFFEEEFEFEEFFEFEEEEEEFEEFFEF	TRBV6-8*00(211),TRBV6-1*00(206),TRBV6-5*00(206),TRBV6-6*00(190)	TRBD1*00(40)	TRBJ2-7*00(205)		424|433|461|0|9||45.0;427|436|464|0|9||45.0;427|436|464|0|9||45.0;427|436|464|0|9||45.0	14|22|36|21|29||40.0	26|39|67|32|45||65.0		NA	NA	NA	NA	NA	NA	NA	NA	NA	NA	TGTGCCAGCTTTCCATCTTTCGACAGGGGAAGCGAGCAGTACTTC	36	NA	NA	NA	NA	NA	NA	NA	CASFPSFDRGSEQYF	NA	:::::::::0:-8:9:21:-2:-2:29:32:-6:45:::
[truncated: 2,141 more rows]
