# Supplementary material for: Heterogeneity of tumor immune microenvironment of EGFR/ALK-positive tumors versus EGFR/ALK-negative tumors in resected brain metastases from lung adenocarcinoma
Source: HighWire-hosted journal article supplement (doi:10.1136/jitc-2022-006243), 2023-03-01
Supplement: jitc-2022-006243supp017_data_supplement.xlsx [file jitc-2022-006243supp017_data_supplement.xlsx]

## Sheet: Sheet1
TableS6. immunohistochemical evaluation.
	Pathologist 1					Pathologist 2									Pathologist 1					Pathologist 2									Pathologist 1					Pathologist 2
ID-FOXP3	Area 1	Area 2	Area 3	Area 4	Area 5	Area 1	Area 2	Area 3	Area 4	Area 5	Group	Averag count of cells		ID-CD8	Area 1	Area 2	Area 3	Area 4	Area 5	Area 1	Area 2	Area 3	Area 4	Area 5	Group	Averag count of cells		ID-CD163	Area 1	Area 2	Area 3	Area 4	Area 5	Area 1	Area 2	Area 3	Area 4	Area 5	Group	Averag count of cells
BM01	4	1	0	0	0	1	0	0	0	0	WT	0.6		BM01	0	0	0	0	0	0	0	0	0	0	WT	0		BM01	20	17	21	28	40	17	13	28	45	52	WT	28.1
BM02	4	0	0	0	0	1	0	0	0	0	WT	0.5		BM02	9	14	10	16	16	5	12	8	11	13	WT	11.4		BM02	28	35	16	30	27	32	20	12	20	35	WT	25.5
BM03	25	32	14	31	9	18	27	15	34	4	EGFR	20.9		BM03	0	0	0	0	0	0	0	0	0	0	EGFR	0		BM03	16	51	17	6	6	17	48	20	7	8	EGFR	19.6
BM04	2	7	8	9	2	1	8	6	7	1	WT	5.1		BM04	20	16	15	12	8	18	6	8	5	3	WT	11.1		BM04	51	71	50	51	62	60	73	58	53	68	WT	59.7
BM05	7	8	2	3	0	5	2	1	1	0	EGFR	2.9		BM05	14	3	7	2	0	7	3	5	0	0	EGFR	4.1		BM05	31	20	15	7	10	23	25	16	7	11	EGFR	16.5
BM06	1	1	2	2	2	1	2	1	1	1	EGFR	1.4		BM06	9	0	6	0	0	0	0	0	0	0	EGFR	1.5		BM06	10	27	19	20	8	17	30	20	28	10	EGFR	18.9
BM07	7	7	3	3	5	7	6	2	5	3	ALK	4.8		BM07	2	8	3	2	0	3	8	2	1	0	ALK	2.9		BM07	74	93	81	69	71	70	78	82	71	65	ALK	75.4
BM08	0	0	0	0	0	0	0	0	0	0	EGFR	0		BM08	28	19	20	25	21	23	27	29	31	18	EGFR	24.1		BM08	48	37	52	7	51	57	39	72	11	77	EGFR	45.1
BM09	10	11	19	0	0	8	9	17	0	0	EGFR	7.4		BM09	6	0	0	1	0	1	0	0	0	0	EGFR	0.8		BM09	6	31	9	16	42	9	35	11	28	53	EGFR	24
BM10	0	0	0	0	0	0	0	0	0	0	WT	0		BM10	13	2	21	16	4	7	1	10	11	0	WT	8.5		BM10	21	16	25	20	27	28	18	28	22	38	WT	24.3
BM11	3	3	0	0	0	3	2	0	0	0	EGFR	1.1		BM11	42	27	44	18	7	40	22	41	9	2	EGFR	25.2		BM11	47	72	58	65	73	52	82	54	59	88	EGFR	65
BM12	47	40	44	51	15	45	43	52	53	12	WT	40.2		BM12	22	14	18	17	36	28	11	15	38	18	WT	21.7		BM12	30	21	12	38	18	41	25	7	48	15	WT	25.5
BM13	4	0	0	0	0	1	0	0	0	0	WT	0.5		BM13	16	8	12	7	7	18	10	12	5	5	WT	10		BM13	5	20	7	8	4	4	22	15	12	3	WT	10
BM14	1	1	0	0	0	0	0	0	0	0	ALK	0.2		BM14	4	0	0	0	0	1	0	0	0	0	ALK	0.5		BM14	79	72	78	74	68	89	93	73	74	78	ALK	77.8
BM15	0	0	0	0	0	0	0	0	0	0	EGFR	0		BM15	0	0	0	0	0	0	0	0	0	0	EGFR	0		BM15	4	11	7	9	7	4	10	6	14	3	EGFR	7.5
BM16	14	8	12	31	6	12	7	7	22	5	EGFR	12.4		BM16	16	8	19	24	10	12	5	14	22	8	EGFR	13.8		BM16	28	50	41	17	29	36	63	52	22	35	EGFR	37.3
BM17	1	2	2	2	0	1	1	0	0	0	EGFR	0.9		BM17	0	0	0	0	0	0	0	0	0	0	EGFR	0		BM17	41	37	38	30	60	45	42	37	31	80	EGFR	44.1
BM18	0	0	0	0	0	0	0	0	0	0	ALK	0		BM18	8	0	0	0	0	7	0	0	0	0	ALK	1.5		BM18	58	68	52	41	35	75	78	38	37	28	ALK	51
BM19	31	36	32	41	30	28	30	31	37	25	EGFR	32.1		BM19	0	0	0	0	0	0	0	0	0	0	EGFR	0		BM19	31	26	23	25	44	40	22	12	38	48	EGFR	30.9
BM20	7	4	18	6	0	2	21	2	0	0	EGFR	6		BM20	25	34	8	1	2	30	38	10	0	0	EGFR	14.8		BM20	37	35	28	41	27	28	37	22	50	17	EGFR	32.2
BM21	5	0	0	0	0	0	0	0	0	0	ALK	0.5		BM21	18	24	0	0	0	15	28	0	0	0	ALK	8.5		BM21	59	36	45	50	38	68	34	41	51	42	ALK	46.4
BM22	1	1	0	0	0	0	0	0	0	0	EGFR	0.2		BM22	5	4	16	12	3	3	3	12	10	3	EGFR	7.1		BM22	6	8	6	7	0	12	9	6	4	0	EGFR	5.8
BM23	2	6	14	2	5	3	5	4	0	0	EGFR	4.1		BM23	55	30	52	37	46	51	37	41	53	36	EGFR	43.8		BM23	50	48	25	17	58	55	52	43	28	57	EGFR	43.3
BM24	25	13	28	27	12	20	10	24	22	13	EGFR	19.4		BM24	56	32	28	18	10	20	14	13	32	22	EGFR	24.5		BM24	NA	NA	NA	NA	NA	N/A	N/A	N/A	N/A	N/A	EGFR	/
BM25	0	0	0	0	0	0	0	0	0	0	ALK	0		BM25	28	34	0	0	0	37	45	0	0	0	ALK	14.4		BM25	65	82	66	62	77	58	92	64	55	75	ALK	69.6
BM26	2	0	0	0	0	0	0	0	0	0	EGFR	0.2		BM26	8	18	28	13	9	3	6	12	7	8	EGFR	11.2		BM26	15	26	20	37	12	20	24	17	48	15	EGFR	23.4
BM27	0	0	0	0	0	0	0	0	0	0	KRAS	0		BM27	7	0	0	0	0	5	0	0	0	0	KRAS	1.2		BM27	50	20	35	41	28	45	12	41	46	40	KRAS	35.8
BM28	30	71	35	32	28	25	62	18	30	32	EGFR	36.3		BM28	12	30	33	24	12	30	48	42	28	15	EGFR	27.4		BM28	51	45	61	62	35	61	55	72	66	40	EGFR	54.8
BM29	1	1	1	0	0	1	1	0	0	0	KRAS	0.5		BM29	0	0	0	0	0	0	0	0	0	0	KRAS	0		BM29	30	11	32	39	38	42	14	42	50	62	KRAS	36
BM30	8	9	10	2	1	6	5	4	1	0	EGFR	4.6		BM30	10	14	11	7	0	5	16	6	0	0	EGFR	6.9		BM30	30	28	45	35	36	25	22	55	40	30	EGFR	34.6
BM31	2	1	0	0	0	0	0	0	0	0	KRAS	0.3		BM31	39	95	0	0	0	32	88	0	0	0	KRAS	25.4		BM31	38	34	58	40	64	45	36	65	45	66	KRAS	49.1
BM32	0	0	0	0	0	0	0	0	0	0	ALK	0		BM32	39	20	42	44	19	30	40	45	11	5	ALK	29.5		BM32	49	46	38	27	28	43	51	34	22	25	ALK	36.3
BM33	8	8	7	10	13	12	7	4	6	5	EGFR	8		BM33	28	7	17	19	4	21	22	28	4	2	EGFR	15.2		BM33	25	30	40	36	17	31	22	37	42	16	EGFR	29.6
BM34	0	0	0	0	0	0	0	0	0	0	WT	0		BM34	26	12	70	22	0	23	7	42	15	0	WT	21.7		BM34	26	10	29	16	22	22	5	50	10	28	WT	21.8
BM36	9	2	16	7	6	5	1	10	4	5	ALK	6.5		BM36	0	0	0	0	0	0	0	0	0	0	ALK	0		BM36	66	62	34	30	28	72	32	26	23	25	ALK	39.8
BM37	14	15	9	8	1	12	10	5	4	1	WT	7.9		BM37	20	75	28	40	65	12	46	44	18	42	WT	39		BM37	7	8	21	15	24	35	25	40	12	10	WT	19.7
BM38	2	2	5	0	0	1	1	1	0	0	KRAS	1.2		BM38	61	67	64	48	42	42	55	45	37	24	KRAS	48.5		BM38	30	12	20	8	7	38	7	14	5	3	KRAS	14.4
BM39	2	4	5	4	0	5	4	3	0	0	ALK	2.7		BM39	5	0	0	0	0	3	0	0	0	0	ALK	0.8		BM39	28	25	27	26	23	25	18	16	18	16	ALK	22.2
BM40	30	12	28	27	29	28	30	25	22	15	EGFR	24.6		BM40	6	5	10	8	2	3	5	9	4	0	EGFR	5.2		BM40	26	18	72	66	23	22	23	72	74	31	EGFR	42.7
BM41	2	3	4	0	0	3	2	2	0	0	WT	1.6		BM41	10	0	0	0	0	2	0	0	0	0	WT	1.2		BM41	35	18	23	24	20	42	16	20	24	18	WT	24
BM42	1	2	0	0	0	0	0	0	0	0	WT	0.3		BM42	18	17	285	120	130	25	8	260	102	115	WT	108		BM42	44	38	34	48	39	52	58	35	58	46	WT	45.2
BM43	0	0	0	0	0	0	0	0	0	0	KRAS	0		BM43	42	56	62	45	53	37	35	39	41	51	KRAS	46.1		BM43	22	30	45	58	50	26	43	72	74	61	KRAS	48.1
BM44	10	4	12	7	8	11	3	13	6	7	WT	8.1		BM44	38	42	45	30	25	27	31	46	29	23	WT	33.6		BM44	38	54	39	71	73	42	47	35	81	82	WT	56.2
BM45	24	13	23	26	23	27	15	26	28	19	EGFR	22.4		BM45	8	68	38	34	3	10	78	40	45	1	EGFR	32.5		BM45	41	71	66	72	60	37	87	80	78	72	EGFR	66.4
BM46	18	11	12	0	0	15	7	8	0	0	EGFR	7.1		BM46	0	0	0	0	0	0	0	0	0	0	EGFR	0		BM46	40	25	23	30	29	47	34	30	34	30	EGFR	32.2
BM47	0	0	0	0	0	0	0	0	0	0	WT	0		BM47	NA	NA	NA	NA	NA	N/A	N/A	N/A	N/A	N/A	WT	/		BM47	NA	NA	NA	NA	NA	N/A	N/A	N/A	N/A	N/A	WT	/
BM48	18	13	31	9	11	10	7	8	21	5	EGFR	13.3		BM48	0	1	2	0	0	0	0	0	0	0	EGFR	0.3		BM48	37	18	67	52	20	60	16	92	66	21	EGFR	44.9
BM49	3	9	7	0	0	3	5	6	0	0	KRAS	3.3		BM49	63	21	12	44	0	58	20	21	47	0	KRAS	28.6		BM49	20	46	78	62	49	12	52	82	65	55	KRAS	52.1
BM52	2	1	1	2	0	1	1	0	0	0	EGFR	0.8		BM52	0	0	0	0	0	0	0	0	0	0	EGFR	0		BM52	34	30	25	32	48	40	35	35	46	60	EGFR	38.5
BM53	1	0	0	0	0	0	0	0	0	0	ALK	0.1		BM53	0	0	0	0	0	0	0	0	0	0	ALK	0		BM53	83	58	70	47	75	98	72	81	45	72	ALK	70.1
BM54	8	5	9	12	21	6	2	4	4	18	EGFR	8.9		BM54	18	47	10	31	0	11	35	4	34	0	EGFR	19		BM54	22	12	16	10	17	20	15	17	6	15	EGFR	15
BM55	1	2	0	0	0	1	0	0	0	0	EGFR	0.4		BM55	25	35	45	20	15	32	37	41	31	7	EGFR	28.8		BM55	28	22	26	33	27	31	24	30	34	25	EGFR	28
BM56	2	2	0	0	0	1	0	0	0	0	EGFR	0.5		BM56	11	31	7	0	0	5	4	8	0	0	EGFR	6.6		BM56	11	12	5	7	0	10	3	6	11	0	EGFR	6.5
BM57	0	0	0	0	0	0	0	0	0	0	WT	0		BM57	12	48	18	3	0	36	17	18	1	0	WT	15.3		BM57	54	52	56	45	42	65	68	60	39	38	WT	51.9
BM58	0	0	0	0	0	0	0	0	0	0	WT	0		BM58	90	15	25	18	10	68	21	17	12	10	WT	28.6		BM58	22	30	61	72	32	34	38	75	82	28	WT	47.4
BM59	1	2	1	3	2	1	1	2	1	0	KRAS	1.4		BM59	35	15	66	47	18	28	22	68	45	15	KRAS	35.9		BM59	18	29	19	38	23	13	17	10	35	28	KRAS	23
BM60	2	0	0	0	0	3	0	0	0	0	WT	0.5		BM60	10	15	20	14	16	10	12	13	11	10	WT	13.1		BM60	32	13	14	18	25	25	17	10	16	27	WT	19.7
BM61	1	0	0	0	0	1	0	0	0	0	KRAS	0.2		BM61	85	95	91	110	88	82	87	77	95	68	KRAS	87.8		BM61	61	54	48	50	62	72	65	60	55	68	KRAS	59.5
BM62	5	8	3	5	0	4	5	2	2	0	WT	3.4		BM62	70	45	98	100	55	62	41	92	96	42	WT	70.1		BM62	70	62	61	44	40	62	61	55	50	46	WT	55.1
BM63	2	0	0	0	0	0	0	0	0	0	EGFR	0.2		BM63	16	4	12	18	8	24	7	27	23	6	EGFR	14.5		BM63	50	41	42	37	36	61	55	63	45	32	EGFR	46.2
BM64	22	30	29	21	16	20	25	26	17	10	EGFR	21.6		BM64	21	0	0	0	0	3	0	0	0	0	EGFR	2.4		BM64	52	58	21	18	38	55	62	25	22	35	EGFR	38.6
BM65	1	4	3	2	6	4	3	1	0	0	EGFR	2.4		BM65	27	31	17	13	21	29	37	26	27	25	EGFR	25.3		BM65	16	15	14	10	23	22	23	21	32	10	EGFR	18.6
BM66	2	0	0	0	0	2	0	0	0	0	KRAS	0.4		BM66	2	0	0	0	0	0	0	0	0	0	KRAS	0.2		BM66	35	25	30	37	51	42	37	48	32	62	KRAS	39.9
BM67	4	12	11	7	0	6	3	4	0	0	EGFR	4.7		BM67	20	11	5	18	28	8	20	9	22	25	EGFR	16.6		BM67	27	26	31	46	25	18	31	27	54	18	EGFR	30.3
BM69	2	0	0	0	0	0	0	0	0	0	EGFR	0.2		BM69	0	2	3	1	0	0	2	2	3	0	EGFR	1.3		BM69	18	20	7	19	5	6	11	4	12	2	EGFR	10.4
BM70	1	4	9	5	0	4	5	0	0	0	KRAS	2.8		BM70	48	28	66	40	0	41	13	38	32	0	KRAS	30.6		BM70	45	37	28	42	19	35	41	32	46	23	KRAS	34.8
